# Supplementary material for: Cobalt-Catalyzed Cross-Electrophile Coupling of Alkynyl Sulfides with Unactivated Chlorosilanes
Source: Research Square preprint supplement (doi:10.21203/rs.3.rs-3883309/v1), 2024-01-29
Supplement: Supplementary file 1 [file 3b2b18690b46a6f37885c495.docx]

**Supporting Information**

**Cobalt-Catalyzed Cross-Electrophile Coupling of Alkynyl Sulfides with** **Unactivated Chlorosilanes**

Donghui Xing, Jinlin Liu, Dingxin Cai, Bin Huang, Huanfeng Jiang, Liangbin Huang*

State Key Laboratory of Pulp & Paper Engineering, Key Laboratory of Functional Molecular Engineering of Guangdong Province, School of Chemistry and Chemical Engineering, South China University of Technology, Guangzhou 510640, China.
E-mail: huanglb@scut.edu.cn.

Table of Contents

[**1. General Information** 1](#_Toc153322573)

[**2. Optimization of Reaction Conditions** 2](#_Toc153322574)

[**2.1 General Procedure for the Optimization Reactions** 2](#_Toc153322575)

[**Table S1: Screening of Additives** 3](#_Toc153322576)

[**Table S2: Screening of Solvents** 4](#_Toc153322577)

[**Table S3: Screening of Ligands** 5](#_Toc153322578)

[**Table S4: Screening of Cobalt Catalysts** 6](#_Toc153322579)

[**Table S5: Screening of Other Reaction Parameters.** 7](#_Toc153322580)

[**3. Synthesis of Substrates** 8](#_Toc153322581)

[**3.1. Synthesis of Alkynyl Sulfides** 8](#_Toc153322582)

[**3.2. Synthesis of Chlorosilanes** 20](#_Toc153322583)

[**4. Experimental Procedures and Characterization of Products** 21](#_Toc153322584)

[**4.1. General Procedure F** 21](#_Toc153322585)

[**4.2. Characterization Data of Products** 21](#_Toc153322586)

[**4.3. Gram-Scale Experiment** 49](#_Toc153322587)

[**4.4. Product Derivatizations** 49](#_Toc153322588)

[**5. Mechanistic studies** 54](#_Toc153322589)

[**5.1. Radical trapping experiments** 54](#_Toc153322590)

[**5.2. Radical clock experiment** 54](#_Toc153322591)

[**5.3. Control experiments** 55](#_Toc153322592)

[**6. NMR Spectra** 57](#_Toc153322593)

[**7. Reference** 176](#_Toc153322594)

**1. General Information**

**Reagents and Solvents**

Unless otherwise noted, all chemicals used in the preparation of starting materials were commercially available and were used as received without further purifications. Metal catalysts and ligands were purchased from Acros, Laajoo, Energy Chemical, Bidepharm, and Accela. Other chemicals were purchased from Macklin, Adamas, and Innochem, and were directly used without further purifications.

Anhydrous solvents were purchased from Energy Chemical and Innochem. Toluene was distilled from sodium/benzophenone and stored under nitrogen before use.

**Analytical Methods**

1H, 13C and 19F NMR spectra were recorded using a Bruker DRX-400 spectrometer or a Bruker DRX-500 spectrometer using CDCl3 as solvent. The chemical shifts are referenced to signals at 7.26 and 77.0 ppm, respectively, and chloroform is solvent with TMS as the internal standard. Chemical shifts are reported in parts per million (ppm), multiplicities are indicated by s (singlet), d (doublet), t (triplet), q (quartet), m (multiplet) and br (broad). Coupling constants (J) are reported in Hertz. Melting points were measured using a melting point instrument. Mass spectra were recorded on a Thermo Scientific ISQ gas chromatograph-mass spectrometer. GC analyses were performed on an Agilent 7890B GC equipped with HP-5 columns (30 m × 320 μm × 0.25 μm), FID detectors, and hydrogen as the carrier gas. GC/MS analyses were performed on a Shimadzu GCMS-QP2010SE equipped with an RTX-5MS column (30 m × 0.25 mm × 0.25 μm) with a quadrupole mass analyzer using helium as the carrier gas. TLC was performed by using commercially prepared 100-400 mesh silica gel plates and visualization was effected at 254 nm.

**2. Optimization of Reaction Conditions**

**2.1 General Procedure for the Optimization Reactions**

The procedure was conducted in a nitrogen-filled glove box. To a reaction vial equipped with a magnetic stir bar was added the indicated catalyst (10 mol%), ligand (15 mol%), and reductant (0.20 mmol, 2.0 equiv). A solution of substrate **1a** (17.8 mg, 0.10 mmol, 1.0 equiv) and TMSCl (32.6 mg, 0.30 mmol, 3.0 equiv) in 1.0 mL of the indicated solvent was then added by syringe, and the resultung mixture was maintained with stirring at room temperature for 4-6 h. After the indicated reaction time, the mixture was diluted with EtOAc (10 mL) and washed with water. The organic phase was then dried over anhydrous Na2SO4, filtered, and concentrated in vacuo. The residue was dissolved with 2 mL EtOAc and subjected to GC analysis with dodecane as the internal standard**.**

**Table S1: Screening of Additives**

| **Entry** | **additive** | **Yield (%)**[a,b] | |
| --- | --- | --- | --- |
| 1 | -- | 43 |
| 2 | NaI | 38 |
| 3 | LiI | 36 |
| 4 | LiBr | 40 |
| 5 | LiCl | 41 |
| 6 | MgCl2 | 35 |
| 7 | MgBr2 | 37 |
| 8 | ZnCl2 | 33 |
| 9 | ZnI2 | 31 |

[a] All reactions were performed on a 0.10 mmol scale. [b] Yield was determined by GC analysis with dodecane as an internal standard.

**Table S2: Screening of Solvents**

| **Entry** | **Solvent** | **Yield (%)**[a,b] |
| --- | --- | --- |
| 1 | DMF | 43 |
| 2 | DMA | 31 |
| 3 | NMP | 39 |
| 4 | DMSO | n.d. |
| 5 | MeCN | trace |
| 6 | DCE | n.d. |
| 7 | THF | trace |
| 8 | dioxane | n.d. |
| 9 | toluene | n.d. |
| 10 | hexane | n.d. |

[a] All reactions were performed on a 0.10 mmol scale. [b] Yield was determined by GC analysis with dodecane as an internal standard.

**Table S3: Screening of Ligands**

[a] All reactions were performed on a 0.10 mmol scale. [b] Yield was determined by GC analysis with dodecane as an internal standard.

**Table S4: Screening of Cobalt Catalysts**

| **Entry** | **[Co]** | **Yield (%)**[a,b] | |
| --- | --- | --- | --- |
| 1 | CoI2 | 87 |
| 2 | CoBr2 | 38 |
| 3 | CoCl2 | 69 |
| 4 | Co(acac)2 | 70 |
| 5 | Co(acac)3 | 73 |
| 6 | Co(OAc)2 | 72 |

[a] All reactions were performed on a 0.10 mmol scale. [b] Yield was determined by GC analysis with dodecane as an internal standard.

**Table S5: Screening of Other Reaction Parameters.**

| **Entry** | **Variations** | **Yield (%)**[a,b] | |
| --- | --- | --- | --- |
| **1** | **none** | **87(85)**[c] |
| 2 | 0 °C instead of rt | n.d. |
| 3 | 70 °C instead of rt | 72 |
| 4 | Mn instead of Zn | n.d. |
| 5 | Mn instead of Zn | 67[d] |
| 6 | Mn instead of Zn | 35[e] |
| 7 | w/o Zn | n.d. |
| 8 | w/o CoI2 | n.d. |
| 9 | w/o tpy | n.d. |
| 10 | 2 equiv TMSCl | 86 |
| 11 | 3 equiv Zn | 82 |
| 12 | DMF(0.2M) | 47 |
| 13 | NiI2 | 45 |
| 14 | Fe(acac)2 | n.d. |
| 15 | CrCl2 | 29 |

[a] All reactions were performed on a 0.10 mmol scale. [b] Yield was determined by GC analysis with dodecane as an internal standard. [c] Isolated yield after flash chromatography on silica gel. [d] Using 1 equiv ZnI2 as the additive. [e] Using 1 equiv Zn(OTf)2 as the additive; n.d. = no detected; w/o = without.

**3. Synthesis of Substrates**

**3.1. Synthesis of Alkynyl Sulfides**

**The alkynyl sulfides used in this paper:**

All the substrates above were synthesized according to the literature reports.[[1](#_ENREF_1)] All spectroscopic data of known molecules match those previously reported in the literature. Some new alkynyl sulfides were synthesized with the following procedures.

**General Procedure A (Most of the substrates were synthesized by this method)**

According to our previous literature procedure[[1b](#_ENREF_2)], the respective 1,2,3-thiadiazole (1.0 equiv), K3PO4 (2.0 equiv) and MeI (2.0 equiv) were suspended in MeCN at room temperature and stirred for 24 h at 70 oC. The mixture was quenched by 1N-HCl. Then the reaction mixture was diluted with ethyl acetate, washed with water, the organic phases were dried over anhydrous Na2SO4, filtered and concentrated in vacuum. The residue was purified by flash column chromatography on silica gel with petroleum ether/ethyl acetate as the eluent to afford the corresponding products.

**General Procedure B**

According to a literature procedure[[1c](#_ENREF_3)], the respective (hetero)aryl iodide (1.0 equiv), Pd(PPh3)Cl2 (1 mol%), CuI (10 mol%) and K2CO3 (6.0 equiv) were added to a Schlenk flask equipped with a PTFE-coated stir bar under argon. 1-methylthio-2-(trimethylsilyl)-ethyne (1.2 equiv) and solvent MeOH/Et3N/THF (0.25 M, 1:2:2 v:v:v) were added and the reaction mixture was stirred for 16 h at rt. Upon completion, the reaction mixture was filtered, concentrated in vacuo and the crude material was purified by column chromatography on silica gel to afford the desired products.

**General Procedure C**

According to a literature procedure[[1e](#_ENREF_5)], a mixture of arylacetylene (1.0 equiv), TolSO2SMe (1.5 equiv), CuI (5.0 mol %), Xantphos (6.0 mol %), and K2CO3 (1.5 equiv) was suspended in DMSO at room temperature and stirred for 24 h at the same temperature. After filtration of the mixture through a pad of Celite, the filtrate was concentrated under reduced pressure. To the residue was added ethyl acetate and the mixture was washed with aqueous saturated solution of sodium bicarbonate and brine, and then dried (Na2SO4). After filtration, the filtrate was concentrated under reduced pressure. The crude residue was purified by column chromatography using silica gel with petrol ether/ethyl acetate as the eluent to afford the corresponding products.

**General Procedure D**

According to a literature procedure[[2](#_ENREF_6)], a suspension of methyl 4-((methylthio)ethynyl)benzoate (1.0 equiv) in a 1:1 mixture of MeOH/H2O (40 mL) was treated with NaOH (3.0 equiv). The mixture was stirred at 40 oC for 2 h. The mixture was then diluted with H2O and the MeOH was mostly removed in vacuo. The H2O solution was washed with ether, acidified to pH 1 with 2 M HCl solution and extracted with EtOAc. The combined EtOAc extracts were washed with brine, dried over MgSO4, and concentrated in vacuo to give corresponding carboxylic acid as a white solid.

**General Procedure E**

According to a literature procedure[[3](#_ENREF_7)], to a 50 mL heat-gun dried round bottom flask were added 10 mL dry methylene chloride (DCM), 4-((methylthio)ethynyl)benzoic acid (1.0 equiv). The round bottom flask with the DCM and 4-((methylthio)ethynyl)benzoic acid were posed into an ice bath. Then oxalyl chloride (1.1 equiv) and two drops DMF were added into the flask. The gas formation was observed. The mixture remained stirring for another 1 hour at room temperature. Then desired coupling amine or alcohol (1.1 equiv), NEt3 (1.1 equiv) in 3 mL DCM were added into the previous mixture dropwise at 0 oC. After the addition, the mixture were kept stirring for another 8 hours at room temperature. The mixture was concentrated in vacuo, the residue was directly purified by flash column chromatography on silica gel to give the desired product (amide or ester).

**Characterization of New Alkynyl Sulfides**

**((4-(benzyloxy)phenyl)ethynyl)(methyl)sulfane (1b)**

It’s synthesized according to general **procedure A**. White solid, 73% yield (flash column chromatography eluent, petrol ether/ ethyl acetate = 100/1).

**1H NMR** (400 MHz, Chloroform-*d*) δ 7.78 – 7.25 (m, 7H), 6.94 (s, 2H), 5.09 (s, 2H), 2.48 (s, 3H).

**13C NMR** (101 MHz, Chloroform-*d*) δ 158.7, 136.5, 133.4, 128.6, 128.1, 127.4, 115.7, 114.8, 79.1, 70.0, 19.5.

**Melting point**: 63-64 °C

**HRMS-ESI (m/z):** [M+H]+ Calcd for C16H15OS 255.0838; Found: 255.0833.

**4-((methylthio)ethynyl)phenyl acetate (1f)**

It’s synthesized according to general **procedure A**. Yellow oil, 63% yield (flash column chromatography eluent, petrol ether/ ethyl acetate = 50/1).

**1H NMR** (500 MHz, Chloroform-*d*) δ 7.33 (d, *J* = 8.6 Hz, 2H), 6.95 (d, *J* = 8.6 Hz, 2H), 2.37 (s, 3H), 2.19 (s, 3H).

**13C NMR** (126 MHz, Chloroform-*d*) δ 169.0, 150.2, 132.5, 121.5, 120.9, 90.9, 81.0, 21.0, 19.2.

**HRMS-ESI (m/z):** [M+H]+ Calcd for C11H11O2S 207.0474; Found: 207.0471.

**methyl((4-(trifluoromethoxy)phenyl)ethynyl)sulfane (1g)**

It’s synthesized according to general **procedure A**. Yellow oil, 88% yield (flash column chromatography eluent, petrol ether/ ethyl acetate = 100/1).

**1H NMR** (500 MHz, Chloroform-*d*) δ 7.42 (d, *J* = 8.8 Hz, 2H), 7.13 (d, *J* = 8.1 Hz, 2H), 2.47 (s, 3H).

**13C NMR** (126 MHz, Chloroform-*d*) δ 148.7, 132.9, 122.2, 120.8, 120.4 (q, *J* = 257.7 Hz), 90.5, 82.2, 19.3.

**19F NMR** (471 MHz, Chloroform-*d*) δ -57.85.

**HRMS-ESI (m/z):** [M+H]+ Calcd for C10H8F3OS 233.0242; Found: 233.0239.

**N,N-dimethyl-4-((methylthio)ethynyl)benzamide (1o)**

It’s synthesized according to general **procedure E**. White solid, 51% yield (flash column chromatography eluent, petrol ether/ ethyl acetate = 5/1).

**1H NMR** (500 MHz, Chloroform-*d*) δ 7.41 – 7.34 (m, 2H), 7.33 – 7.27 (m, 2H), 3.04 (s, 3H), 2.91 (s, 3H), 2.44 (s, 3H).

**13C NMR** (126 MHz, Chloroform-*d*) δ 170.7, 135.3, 130.9, 127.0, 124.6, 91.1, 82.7, 39.3, 35.2, 19.2.

**Melting point**: 69-70 °C

**HRMS-ESI (m/z):** [M+H]+ Calcd for C12H14NOS 220.0791; Found: 220.0788.

**4-((methylthio)ethynyl)benzoic acid (1p)**

It’s synthesized according to general **procedure D**. White solid, 96% yield.

**1H NMR** (500 MHz, DMSO-*d*6) δ 13.07 (s, 1H), 7.93 (d, *J* = 7.4 Hz, 2H), 7.52 (d, *J* = 7.5 Hz, 2H), 2.55 (s, 3H).

**13C NMR** (126 MHz, DMSO-*d*6) δ 166.8, 130.9, 130.1, 129.6, 127.0, 91.1, 85.4, 19.0.

**Melting point**: 209-210 °C

**HRMS-ESI (m/z):** [M-H]+ Calcd for C10H7O2S 191.0172; Found: 191.0164.

**((4-ethynylphenyl)ethynyl)(methyl)sulfane (1r)**

It’s synthesized according to general **procedure B**. Yellow oil, 78% yield (flash column chromatography eluent, petrol ether/ ethyl acetate = 100/1).

**1H NMR** (500 MHz, Chloroform-*d*) δ 7.41 (d, *J* = 8.4 Hz, 2H), 7.34 (d, *J* = 8.5 Hz, 2H), 3.15 (s, 1H), 2.48 (s, 3H).

**13C NMR** (126 MHz, Chloroform-*d*) δ 132.0, 131.1, 123.9, 121.5, 91.4, 83.5, 83.2, 78.8, 19.3.

**HRMS-ESI (m/z):** [M+H]+ Calcd for C11H9S 173.0419; Found: 173.0418.

**6-((methylthio)ethynyl)quinoline (1ae)**

It’s synthesized according to general **procedure B**. Brown solid, 68% yield (flash column chromatography eluent, petrol ether/ ethyl acetate = 100/1).

**1H NMR** (400 MHz, Chloroform-*d*) δ 8.89 – 8.80 (m, 1H), 8.07 – 7.93 (m, 2H), 7.87 – 7.78 (m, 1H), 7.68 – 7.59 (m, 1H), 7.40 – 7.28 (m, 1H), 2.48 (s, 3H).

**13C NMR** (101 MHz, Chloroform-*d*) δ 150.7, 147.3, 135.5, 131.8, 130.5, 129.4, 127.8, 121.6, 91.5, 82.7, 19.3.

**Melting point**: 38-39 °C

**HRMS-ESI (m/z):** [M+H]+ Calcd for C12H10NS 200.0528; Found: 200.0527.

**5-((methylthio)ethynyl)benzo[b]thiophene (1ah)**

It’s synthesized according to general **procedure A**. Yellow oil, 83% yield (flash column chromatography eluent, petrol ether/ ethyl acetate = 100/1).

**1H NMR** (500 MHz, Chloroform-*d*) δ 7.91 – 7.87 (m, 1H), 7.79 (d, *J* = 8.3 Hz, 1H), 7.46 (d, *J* = 5.4 Hz, 1H), 7.38 (dd, *J* = 8.4, 1.6 Hz, 1H), 7.29 (d, *J* = 5.4 Hz, 1H), 2.50 (s, 3H).

**13C NMR** (126 MHz, Chloroform-*d*) δ 139.46, 139.45, 127.32, 127.26, 126.9, 123.6, 122.3, 119.2, 92.0, 80.2, 19.4.

**HRMS-ESI (m/z):** [M+H]+ Calcd for C11H9S2 205.0140; Found: 205.0139.

**9-methyl-2-((methylthio)ethynyl)-9H-carbazole (1ai)**

It’s synthesized according to general **procedure B**. Yellow oil, 60% yield (flash column chromatography eluent, petrol ether/ ethyl acetate = 100/1).

**1H NMR** (500 MHz, Chloroform-*d*) δ 8.07 (d, *J* = 1.1 Hz, 1H), 7.91 (d, *J* = 7.7 Hz, 1H), 7.42 (dd, *J* = 8.4, 1.6 Hz, 1H), 7.38 – 7.33 (m, 1H), 7.21 (d, *J* = 8.2 Hz, 1H), 7.14 – 7.11 (m, 2H), 3.61 (s, 3H), 2.39 (s, 3H).

**13C NMR** (126 MHz, Chloroform-*d*) δ 141.2, 140.5, 129.6, 126.1, 124.4, 122.5, 122.2, 120.3, 119.3, 113.2, 108.6, 108.3, 93.0, 78.1, 29.0, 19.6.

**HRMS-ESI (m/z):** [M+H]+ Calcd for C16H14NS 252.0841; Found: 252.0837.

**2-((methylthio)ethynyl)dibenzo[b,d]furan (1aj)**

It’s synthesized according to general **procedure A**. White solid, 51% yield (flash column chromatography eluent, petrol ether/ ethyl acetate = 100/1).

**1H NMR** (400 MHz, Chloroform-*d*) δ 8.08 – 8.01 (m, 1H), 7.91 (d, *J* = 7.6 Hz, 1H), 7.57 – 7.44 (m, 4H), 7.35 (t, *J* = 7.8 Hz, 1H), 2.52 (s, 3H).

**13C NMR** (101 MHz, Chloroform-*d*) δ 156.5, 155.7, 130.9, 127.6, 124.4, 124.2, 123.5, 123.0, 120.7, 117.9, 111.7, 111.7, 91.8, 79.7, 19.4.

**Melting point**: 63-64 °C

**HRMS-ESI (m/z):** [M+H]+ Calcd for C15H11OS 239.0525; Found: 239.0521.

**5,6-dimethoxy-2-((1-(4-((methylthio)ethynyl)benzoyl)piperidin-4-yl)methyl)-2,3-dihydro-1H-inden-1-one (1ak)**

It’s synthesized according to general **procedure E**. White solid, 74% yield (flash column chromatography eluent, petrol ether/ ethyl acetate = 3/1).

**1H NMR** (500 MHz, Chloroform-*d*) δ 7.43 (d, *J* = 8.3 Hz, 2H), 7.34 (d, *J* = 8.3 Hz, 2H), 7.17 (s, 1H), 6.87 (s, 1H), 4.70 (s, 1H), 3.94 (d, *J* = 28.9 Hz, 6H), 3.84 – 3.64 (m, 1H), 3.33 – 3.23 (m, 1H), 3.02 (s, 1H), 2.86 – 2.66 (m, 3H), 2.49 (s, 3H), 2.01 – 1.58 (m, 5H), 1.46 – 1.29 (m, 2H).

**13C NMR** (126 MHz, Chloroform-*d*) δ 207.3, 169.5, 155.5, 149.4, 148.5, 135.4, 131.1, 129.0, 126.9, 124.6, 107.2, 104.2, 91.2, 82.7, 56.2, 56.0, 47.9, 44.9, 42.4, 38.5, 34.5, 33.3, 32.3, 31.3, 19.3.

**Melting point**: 133-134 °C

**HRMS-ESI (m/z):** [M+H]+ Calcd for C27H30NO4S 490.2408; Found: 490.2403.

**(4-(8-chloro-5,6-dihydro-11H-benzo[5,6]cyclohepta[1,2-b]pyridin-11-ylidene)piperidin-1-yl)(4-((methylthio)ethynyl)phenyl)methanone (1al)**

It’s synthesized according to general **procedure E**. White solid, 83% yield (flash column chromatography eluent, petrol ether/ ethyl acetate = 1/1).

**1H NMR** (500 MHz, Chloroform-*d*) δ 8.28 (s, 1H), 7.46 – 7.24 (m, 5H), 7.13 – 6.95 (m, 4H), 4.20 – 3.95 (m, 1H), 3.55 (s, 1H), 3.36 – 3.10 (m, 4H), 2.78 – 2.68 (m, 2H), 2.54 – 2.17 (m, 7H).

**13C NMR** (126 MHz, Chloroform-*d*) δ 169.7, 156.4, 146.4, 139.4, 137.6, 136.0, 134.8, 134.4, 133.2, 131.9, 131.4, 131.0, 130.2, 128.8, 126.7, 126.0, 124.7, 122.2, 91.1, 82.9, 48.3, 43.1, 31.4, 31.3, 30.2, 19.1, 17.0.

**Melting point**: 91-92 °C

**HRMS-ESI (m/z):** [M+H]+ Calcd for C29H26ClN2OS 511.1967; Found: 511.1964.

**3,7-dimethyloct-6-en-1-yl 4-((methylthio)ethynyl)benzoate compound with 4-((methylthio)ethynyl)phenyl 5-(2,5-dimethylphenoxy)-2,2-dimethylpentanoate (1:1) (1ao)**

It’s synthesized according to general **procedure B**. Yellow oil, 46% yield (flash column chromatography eluent, petrol ether/ ethyl acetate = 20/1).

**1H NMR** (500 MHz, Chloroform-*d*) δ 7.41 (d, *J* = 6.8 Hz, 2H), 7.00 (d, *J* = 7.4 Hz, 1H), 6.97 (d, *J* = 6.9 Hz, 2H), 6.67 (d, *J* = 7.3 Hz, 1H), 6.62 (s, 1H), 3.98 (s, 2H), 2.48 (d, *J* = 1.8 Hz, 3H), 2.31 (s, 3H), 2.17 (s, 3H), 1.87 (s, 4H), 1.36 (s, 6H).

**13C NMR** (126 MHz, Chloroform-*d*) δ 176.1, 156.8, 150.7, 136.5, 132.6, 130.3, 123.6, 121.6, 120.8, 120.7, 111.9, 91.0, 80.9, 67.7, 42.5, 37.1, 25.2, 25.1, 21.4, 19.3, 15.8.

**HRMS-ESI (m/z):** [M+H]+ Calcd for C24H29O3S 357.2244; Found: 357.2240.

**(3S,8S,9S,10R,13R,14S,17R)-10,13-dimethyl-17-((R)-6-methylheptan-2-yl)-2,3,4,7,8,9,10,11,12,13,14,15,16,17-tetradecahydro-1H-cyclopenta[a]phenanthren-3-yl 4-((methylthio)ethynyl)benzoate (1ap)**

It’s synthesized according to general **procedure E**. White solid, 50% yield (flash column chromatography eluent, petrol ether/ ethyl acetate = 20/1).

**1H NMR** (500 MHz, Chloroform-*d*) δ 7.95 (d, *J* = 8.3 Hz, 2H), 7.42 (d, *J* = 8.2 Hz, 2H), 5.45 – 5.37 (m, 1H), 4.89 – 4.79 (m, 1H), 2.49 (s, 3H), 2.45 (d, *J* = 7.7 Hz, 2H), 2.04 – 1.95 (m, 3H), 1.90 (d, *J* = 13.4 Hz, 1H), 1.86 – 1.79 (m, 1H), 1.78 – 1.62 (m, 2H), 1.59 – 1.44 (m, 6H), 1.35 (dd, *J* = 15.3, 8.3 Hz, 3H), 1.24 – 1.08 (m, 7H), 1.06 (s, 3H), 1.03 – 0.96 (m, 3H), 0.92 (d, *J* = 6.5 Hz, 3H), 0.87 (dd, *J* = 6.6, 2.1 Hz, 6H), 0.68 (s, 3H).

**13C NMR** (126 MHz, Chloroform-*d*) δ 165.4, 139.5, 130.7, 129.7, 129.4, 127.8, 122.8, 91.6, 84.8, 74.7, 56.6, 56.1, 50.0, 42.3, 39.9, 39.5, 38.2, 37.0, 36.6, 36.2, 35.8, 31.89, 31.82, 28.2, 28.0, 27.8, 24.3, 23.8, 22.8, 22.5, 21.0, 19.3, 18.7, 11.8.

**Melting point**: 132-133 °C

**HRMS-ESI (m/z):** [M+H]+ Calcd for C37H53O2S 587.4279; Found: 587.4275.

**((2-bromophenyl)ethynyl)(methyl)sulfane (1as)**

It’s synthesized according to general **procedure A**. Yellow oil, 91% yield (flash column chromatography eluent, petrol ether/ ethyl acetate = 100/1).

**1H NMR** (500 MHz, Chloroform-*d*) δ 7.59 – 7.53 (m, 1H), 7.41 (dd, *J* = 7.7, 1.5 Hz, 1H), 7.25 – 7.20 (m, 1H), 7.15 – 7.09 (m, 1H), 2.52 (s, 3H).

**13C NMR** (126 MHz, Chloroform-*d*) δ 132.7, 132.3, 128.9, 126.9, 125.5, 124.9, 90.6, 86.5, 19.4.

**HRMS-ESI (m/z):** [M+H]+ Calcd for C9H8BrS 226.9525; Found: 226.9521.

**4-((methylthio)ethynyl)phenyl 4-methylbenzenesulfonate (1au)**

It’s synthesized according to general **procedure A**. Yellow oil, 81% yield (flash column chromatography eluent, petrol ether/ ethyl acetate = 50/1).

**1H NMR** (400 MHz, Chloroform-*d*) δ 7.65 (d, *J* = 8.3 Hz, 2H), 7.30 – 7.25 (m, 4H), 6.92 – 6.87 (m, 2H), 2.41 (s, 3H), 2.39 (s, 3H).

**13C NMR** (101 MHz, Chloroform-*d*) δ 148.7, 145.4, 132.4, 131.7, 129.6, 128.2, 122.21, 122.19, 90.3, 82.4, 21.4, 19.0.

**HRMS-ESI (m/z):** [M+H]+ Calcd for C16H15O3S2 319.0457; Found: 319.0455.

**4-((methylthio)ethynyl)phenyl trifluoromethanesulfonate (1av)**

It’s synthesized according to general **procedure A**. Yellow oil, 70% yield (flash column chromatography eluent, petrol ether/ ethyl acetate = 100/1).

**1H NMR** (400 MHz, Chloroform-*d*) δ 7.52 – 7.45 (m, 2H), 7.23 (d, *J* = 8.8 Hz, 2H), 2.51 (s, 3H).

**13C NMR** (101 MHz, Chloroform-*d*) δ 148.6, 133.0, 124.1, 121.4, 120.3, 90.0, 83.7, 19.2.

**19F NMR** (376 MHz, Chloroform-*d*) δ -72.79.

**HRMS-ESI (m/z):** [M+H]+ Calcd for C10H8F3O3S2 296.9861; Found: 296.9857.

**2-((methylthio)ethynyl)phenyl trifluoromethanesulfonate (1aw)**

It’s synthesized according to general **procedure A**. Yellow oil, 67% yield (flash column chromatography eluent, petrol ether/ ethyl acetate = 100/1).

**1H NMR** (500 MHz, Chloroform-*d*) δ 7.51 (dd, *J* = 7.5, 1.9 Hz, 1H), 7.39 – 7.31 (m, 2H), 7.29 – 7.26 (m, 1H), 2.54 (s, 3H).

**13C NMR** (126 MHz, Chloroform-*d*) δ 149.5, 133.1, 129.2, 128.1, 121.5, 118.7 (q, *J* = 320.5 Hz), 118.5, 89.6, 85.1, 18.9.

**19F NMR** (471 MHz, Chloroform-*d*) δ -73.67.

**HRMS-ESI (m/z):** [M+H]+ Calcd for C10H8F3O3S2 296.9861; Found: 296.9860.

**4-bromo-2-((methylthio)ethynyl)phenyl trifluoromethanesulfonate (1ax)**

It’s synthesized according to general **procedure A**. Yellow oil, 45% yield (flash column chromatography eluent, petrol ether/ ethyl acetate = 100/1).

**1H NMR** (500 MHz, Chloroform-*d*) δ 7.61 (d, *J* = 2.4 Hz, 1H), 7.44 (dd, *J* = 8.8, 2.4 Hz, 1H), 7.12 (d, *J* = 8.8 Hz, 1H), 2.52 (s, 3H).

**13C NMR** (126 MHz, Chloroform-*d*) δ 148.3, 135.5, 132.0, 122.9, 121.4, 120.4, 118.6 (q, *J* = 320.6 Hz), 91.7, 84.1, 18.9.

**HRMS-ESI (m/z):** [M+H]+ Calcd for C10H7BrF3O3S2 374.8967; Found: 374.8961.

**((3-bromo-4-methoxyphenyl)ethynyl)(methyl)sulfane (1ay)**

It’s synthesized according to general **procedure A**. Yellow oil, 75% yield (flash column chromatography eluent, petrol ether/ ethyl acetate = 100/1).

**1H NMR** (500 MHz, Chloroform-*d*) δ 7.60 (d, *J* = 1.9 Hz, 1H), 7.32 (dd, *J* = 8.5, 1.9 Hz, 1H), 6.78 (d, *J* = 8.5 Hz, 1H), 3.87 (s, 3H), 2.44 (s, 3H).

**13C NMR** (126 MHz, Chloroform-*d*) δ 155.9, 136.3, 132.1, 116.9, 111.4, 111.2, 90.1, 80.5, 56.2, 19.3.

**HRMS-ESI (m/z):** [M+H]+ Calcd for C10H10BrOS 256.9630; Found: 256.9626.

**((5-bromo-2-chlorophenyl)ethynyl)(methyl)sulfane (1az)**

It’s synthesized according to general **procedure A**. Yellow oil, 66% yield (flash column chromatography eluent, petrol ether/ ethyl acetate = 100/1).

**1H NMR** (400 MHz, Chloroform-*d*) δ 7.54 (d, *J* = 2.3 Hz, 1H), 7.31 (dd, *J* = 8.6, 2.3 Hz, 1H), 7.22 (d, *J* = 8.6 Hz, 1H), 2.51 (s, 3H).

**13C NMR** (101 MHz, Chloroform-*d*) δ 134.9, 134.2, 131.6, 130.4, 125.1, 119.7, 89.0, 87.7, 19.4.

**HRMS-ESI (m/z):** [M+H]+ Calcd for C9H7BrClS 260.9135; Found: 260.9131.

**((5-bromo-2-fluoro-4-methoxyphenyl)ethynyl)(methyl)sulfane (1ba)**

It’s synthesized according to general **procedure A**. White solid, 98% yield (flash column chromatography eluent, petrol ether/ ethyl acetate = 100/1).

**1H NMR** (500 MHz, Chloroform-*d*) δ 7.54 (d, *J* = 7.6 Hz, 1H), 6.60 (d, *J* = 10.8 Hz, 1H), 3.86 (s, 3H), 2.45 (s, 3H).

**13C NMR** (126 MHz, Chloroform-*d*) δ 162.9 (d, *J* = 252.0 Hz), 156.8 (d, *J* = 9.7 Hz), 136.6 (d, *J* = 2.5 Hz), 105.6 (d, *J* = 3.6 Hz), 105.1 (d, *J* = 17.1 Hz), 100.0 (d, *J* = 26.6 Hz), 85.9 (d, *J* = 3.2 Hz), 83.5, 56.5, 19.3.

**19F NMR** (471 MHz, Chloroform-*d*) δ -107.58.

**Melting point**: 39-40 °C

**HRMS-ESI (m/z):** [M+H]+ Calcd for C10H9BrFOS 274.9536; Found: 274.9532.

**((2-chloro-4,5-difluorophenyl)ethynyl)(methyl)sulfane (1bb)**

It’s synthesized according to general **procedure A**. Yellow oil, 67% yield (flash column chromatography eluent, petrol ether/ ethyl acetate = 100/1).

**1H NMR** (400 MHz, Chloroform-*d*) δ 7.25 – 7.18 (m, 2H), 2.51 (s, 3H).

**13C NMR** (126 MHz, Chloroform-*d*) δ 150.1 (dd, *J* = 125.0, 13.5 Hz), 148.1 (dd, *J* = 119.8, 13.5 Hz), 130.9 (dd, *J* = 7.9, 3.5 Hz), 120.6 (d, *J* = 19.4 Hz), 119.9 (dd, *J* = 7.8, 4.1 Hz), 118.4 (d, *J* = 20.7 Hz), 88.2 (d, *J* = 2.1 Hz), 86.9 (t, *J* = 2.2 Hz), 19.2.

**19F NMR** (376 MHz, Chloroform-*d*) δ -133.31 – -133.44 (m), -138.68 – -138.80 (m).

**HRMS-ESI (m/z):** [M+H]+ Calcd for C9H6ClF2S 218.9841; Found: 218.9839.

**((2,4-dichloro-5-fluorophenyl)ethynyl)(methyl)sulfane (1bc)**

It’s synthesized according to general **procedure A**. Yellow oil, 71% yield (flash column chromatography eluent, petrol ether/ ethyl acetate = 100/1).

**1H NMR** (400 MHz, Chloroform-*d*) δ 7.42 (d, *J* = 6.8 Hz, 1H), 7.18 (d, *J* = 9.1 Hz, 1H), 2.52 (s, 3H).

**13C NMR** (101 MHz, Chloroform-*d*) δ 156.2 (d, *J* = 249.5 Hz), 130.8 (d, *J* = 3.5 Hz), 130.6, 123.1 (d, *J* = 8.9 Hz), 121.2 (d, *J* = 19.3 Hz), 119.6 (d, *J* = 23.8 Hz), 89.7, 87.3 (d, *J* = 2.5 Hz), 19.3.

**19F NMR** (376 MHz, Chloroform-*d*) δ -117.47.

**HRMS-ESI (m/z):** [M+H]+ Calcd for C9H6Cl2FS 234.9546; Found: 234.9542.

**4,4,5,5-tetramethyl-2-(4-((methylthio)ethynyl)phenyl)-1,3,2-dioxaborolane (1be)**

It’s synthesized according to general **procedure A**. Yellow solid, 44% yield (flash column chromatography eluent, petrol ether/ ethyl acetate = 10/1).

**1H NMR** (500 MHz, Chloroform-*d*) δ 7.72 (d, *J* = 8.0 Hz, 2H), 7.39 (d, *J* = 8.0 Hz, 2H), 2.48 (s, 3H), 1.34 (s, 12H).

**13C NMR** (126 MHz, Chloroform-*d*) δ 134.5, 130.3, 126.0, 92.1, 83.9, 82.6, 24.8, 19.4.

**Melting point**: 77-78 °C

**HRMS-ESI (m/z):** [M+H]+ Calcd for C15H19BO2S 274.1308; Found: 274.1301.

**3.2. Synthesis of Chlorosilanes**

**The chlorosilanes used in this paper:**

All the substrates above were purchased from Macklin, Energy Chemical and Innochem and used directly.

**4. Experimental Procedures and Characterization of Products**

**4.1. General Procedure F**

The procedure was conducted in a nitrogen-filled glove box. To a reaction vial equipped with a magnetic stir bar was added CoI2 (6.3 mg, 0.02 mmol), **L8** (7.0 mg, 0.03 mmol), Zn (26.2 mg, 2 equiv). A solution of **1** (0.2 mmol) and chlorosilane **2** (0.4 mmol) in DMF (2.0 mL) was added. The reaction vial was sealed and removed from the glove box. The mixture was stirred at room temperature for 4 h, subsequently quenched with water (10.0 mL) and extracted with ethyl acetate (3 × 15.0 mL). The combined organic layers were washed with water, brine, dried over anhydrous Na2SO4, and concentrated under reduced pressure. The residue was purified by flash chromatography on silica gel to afford product.

**4.2. Characterization Data of Products**

**((4-methoxyphenyl)ethynyl)trimethylsilane (3a)**

Prepared according to general procedure F using ((4-methoxyphenyl)ethynyl)(methyl)sulfane (35.6 mg, 0.2 mmol), TMSCl (43.5 mg, 0.4 mmol), CoI2 (6.3 mg, 0.02 mmol), **L8** (7.0 mg, 0.03 mmol), Zn (26.2 mg, 0.4 mmol), DMF (2.0 mL) at room temperature for 4 h. The crude material was purified by flash chromatography on silica gel to provide the title compound **3a** as a colorless oil (35.0 mg, 85% yield)**.** Characterization data matched those reported in the literature.[[4](#_ENREF_8)]

**1H NMR** (500 MHz, Chloroform-*d*) δ 7.41 (d, *J* = 8.4 Hz, 2H), 6.82 (d, *J* = 8.4 Hz, 2H), 3.80 (s, 3H), 0.25 (s, 9H).

**13C NMR** (126 MHz, Chloroform-*d*) δ 159.7, 133.4, 115.2, 113.8, 105.2, 92.4, 55.2, 0.0.

**((4-(benzyloxy)phenyl)ethynyl)trimethylsilane (3b)**

Prepared according to general procedure F using ((4-(benzyloxy)phenyl)ethynyl)(methyl)sulfane (50.8 mg, 0.2 mmol), TMSCl (43.5 mg, 0.4 mmol), CoI2 (6.3 mg, 0.02 mmol), **L8** (7.0 mg, 0.03 mmol), Zn (26.2 mg, 0.4 mmol), DMF (2.0 mL) at room temperature for 4 h. The crude material was purified by flash chromatography on silica gel to provide the title compound **3b** as a yellow oil (48.0 mg, 86% yield)**.**

**1H NMR** (400 MHz, Chloroform-*d*) δ 7.47 – 7.30 (m, 7H), 6.93 – 6.87 (m, 2H), 5.07 (s, 2H), 0.26 (s, 9H).

**13C NMR** (126 MHz, Chloroform-*d*) δ 158.9, 136.5, 133.5, 128.6, 128.1, 127.5, 115.5, 114.7, 105.1, 92.5, 69.9, 0.0.

**HRMS-ESI (m/z):** [M-H]+ Calcd for C18H19OSi 279.1211; Found: 279.1210.

**((3,4-dimethoxyphenyl)ethynyl)trimethylsilane (3c)**

Prepared according to general procedure F using ((3,4-dimethoxyphenyl)ethynyl)(methyl)sulfane (41.6 mg, 0.2 mmol), TMSCl (43.5 mg, 0.4 mmol), CoI2 (6.3 mg, 0.02 mmol), **L8** (7.0 mg, 0.03 mmol), Zn (26.2 mg, 0.4 mmol), DMF (2.0 mL) at room temperature for 4 h. The crude material was purified by flash chromatography on silica gel to provide the title compound **3c** as a yellow oil (43.0 mg, 93% yield). Characterization data matched those reported in the literature.[[5](#_ENREF_9)]

**1H NMR** (400 MHz, Chloroform-*d*) δ 7.08 – 7.04 (m, 1H), 6.95 (d, *J* = 1.8 Hz, 1H), 6.75 (d, *J* = 8.3 Hz, 1H), 3.85 (s, 6H), 0.23 (s, 9H).

**13C NMR** (101 MHz, Chloroform-*d*) δ 149.6, 148.4, 125.3, 115.2, 114.5, 110.7, 105.2, 92.3, 55.78, 55.76, 0.0.

**([1,1'-biphenyl]-4-ylethynyl)trimethylsilane (3d)**

Prepared according to general procedure F using ([1,1'-biphenyl]-4-ylethynyl)(methyl)sulfane (44.8 mg, 0.2 mmol), TMSCl (43.5 mg, 0.4 mmol), CoI2 (6.3 mg, 0.02 mmol), **L8** (7.0 mg, 0.03 mmol), Zn (26.2 mg, 0.4 mmol), DMF (2.0 mL) at room temperature for 4 h. The crude material was purified by flash chromatography on silica gel to provide the title compound **3d** as a white solid (45.0 mg, 90% yield). Characterization data matched those reported in the literature.[[6](#_ENREF_10)]

**1H NMR** (500 MHz, Chloroform-*d*) δ 7.44 – 7.41 (m, 2H), 7.38 (s, 4H), 7.28 (t, *J* = 7.6 Hz, 2H), 7.19 (t, *J* = 7.4 Hz, 1H), 0.12 (s, 9H).

**13C NMR** (126 MHz, Chloroform-*d*) δ 141.2, 140.3, 132.4, 128.8, 127.6, 127.0, 126.8, 122.0, 105.0, 94.8, 0.0.

**((4-(tert-butyl)phenyl)ethynyl)trimethylsilane (3e)**

Prepared according to general procedure F using ((4-(tert-butyl)phenyl)ethynyl)(methyl)sulfane (40.8 mg, 0.2 mmol), TMSCl (43.5 mg, 0.4 mmol), CoI2 (6.3 mg, 0.02 mmol), **L8** (7.0 mg, 0.03 mmol), Zn (26.2 mg, 0.4 mmol), DMF (2.0 mL) at room temperature for 4 h. The crude material was purified by flash chromatography on silica gel to provide the title compound **3e** as a yellow oil (41.0 mg, 89% yield). Characterization data matched those reported in the literature.[[7](#_ENREF_11)]

**1H NMR** (500 MHz, Chloroform-*d*) δ 7.41 (d, *J* = 8.4 Hz, 2H), 7.32 (d, *J* = 8.3 Hz, 2H), 1.31 (s, 9H), 0.25 (s, 9H).

**13C NMR** (126 MHz, Chloroform-*d*) δ 151.7, 131.7, 125.2, 120.1, 105.4, 93.3, 34.8, 31.1, 0.0.

**4-((trimethylsilyl)ethynyl)phenyl acetate (3f)**

Prepared according to general procedure F using 4-((methylthio)ethynyl)phenyl acetate (41.2 mg, 0.2 mmol), TMSCl (43.5 mg, 0.4 mmol), CoI2 (6.3 mg, 0.02 mmol), **L8** (7.0 mg, 0.03 mmol), Zn (26.2 mg, 0.4 mmol), DMF (2.0 mL) at room temperature for 4 h. The crude material was purified by flash chromatography on silica gel to provide the title compound **3f** as a colorless solid (30.0 mg, 65% yield). Characterization data matched those reported in the literature.[[8](#_ENREF_12)]

**1H NMR** (500 MHz, Chloroform-*d*) δ 7.47 (d, *J* = 8.7 Hz, 2H), 7.03 (d, *J* = 8.7 Hz, 2H), 2.29 (s, 3H), 0.24 (s, 9H).

**13C NMR** (126 MHz, Chloroform-*d*) δ 169.0, 150.6, 133.1, 121.5, 120.8, 104.2, 94.3, 21.1, -0.1.

**trimethyl((4-(trifluoromethoxy)phenyl)ethynyl)silane (3g)**

Prepared according to general procedure F using methyl((4-(trifluoromethoxy)phenyl)ethynyl)sulfane (46.4 mg, 0.2 mmol), TMSCl (43.5 mg, 0.4 mmol), CoI2 (6.3 mg, 0.02 mmol), **L8** (7.0 mg, 0.03 mmol), Zn (26.2 mg, 0.4 mmol), DMF (2.0 mL) at room temperature for 4 h. The crude material was purified by flash chromatography on silica gel to provide the title compound **3g** as a colorless oil (41.0 mg, 79% yield). Characterization data matched those reported in the literature.[[7](#_ENREF_11)]

**1H NMR** (500 MHz, Chloroform-*d*) δ 7.50 – 7.46 (m, 2H), 7.14 (d, *J* = 8.1 Hz, 2H), 0.25 (s, 9H).

**13C NMR** (126 MHz, Chloroform-*d*) δ 149.0, 133.5, 122.0, 120.7, 120.4 (q, *J* = 257.8 Hz), 103.5, 95.3, -0.2.

**19F NMR** (471 MHz, Chloroform-*d*) δ -57.84.

**triisopropyl(4-((trimethylsilyl)ethynyl)phenoxy)silane (3h)**

Prepared according to general procedure F using triisopropyl(4-((methylthio)ethynyl)phenoxy)silane (64.0 mg, 0.2 mmol), TMSCl (43.5 mg, 0.4 mmol), CoI2 (6.3 mg, 0.02 mmol), **L8** (7.0 mg, 0.03 mmol), Zn (26.2 mg, 0.4 mmol), DMF (2.0 mL) at room temperature for 4 h. The crude material was purified by flash chromatography on silica gel to provide the title compound **3h** as a yellow oil (60.0 mg, 87% yield). Characterization data matched those reported in the literature.[[9](#_ENREF_13)]

**1H NMR** (500 MHz, Chloroform-*d*) δ 7.34 (d, *J* = 8.6 Hz, 2H), 6.80 (d, *J* = 8.6 Hz, 2H), 1.27 – 1.21 (m, 3H), 1.09 (d, *J* = 7.4 Hz, 18H), 0.24 (s, 9H).

**13C NMR** (126 MHz, Chloroform-*d*) δ 156.6, 133.4, 119.9, 115.6, 105.3, 92.5, 17.9, 12.6, 0.1.

**trimethyl((4-(methylthio)phenyl)ethynyl)silane (3i)**

Prepared according to general procedure F using methyl(4-((methylthio)ethynyl)phenyl)sulfane (38.8 mg, 0.2 mmol), TMSCl (43.5 mg, 0.4 mmol), CoI2 (6.3 mg, 0.02 mmol), **L8** (7.0 mg, 0.03 mmol), Zn (26.2 mg, 0.4 mmol), DMF (2.0 mL) at room temperature for 4 h. The crude material was purified by flash chromatography on silica gel to provide the title compound **3i** as a yellow oil (40.0 mg, 91% yield). Characterization data matched those reported in the literature.[[10](#_ENREF_14)]

**1H NMR** (500 MHz, Chloroform-*d*) δ 7.15 (d, *J* = 8.5 Hz, 2H), 6.93 (d, *J* = 8.4 Hz, 2H), 2.25 (s, 3H), 0.03 (s, 9H).

**13C NMR** (126 MHz, Chloroform-*d*) δ 139.6, 132.2, 125.7, 119.4, 104.9, 94.1, 15.3, 0.0.

**N-(4-((trimethylsilyl)ethynyl)phenyl)acetamide (3j)**

Prepared according to general procedure F using N-(4-((methylthio)ethynyl)phenyl)acetamide (41.0 mg, 0.2 mmol), TMSCl (43.5 mg, 0.4 mmol), CoI2 (6.3 mg, 0.02 mmol), **L8** (7.0 mg, 0.03 mmol), Zn (26.2 mg, 0.4 mmol), DMF (2.0 mL) at room temperature for 4 h. The crude material was purified by flash chromatography on silica gel to provide the title compound **3j** as a white solid (19.0 mg, 41% yield). Characterization data matched those reported in the literature.[[11](#_ENREF_15)]

**1H NMR** (500 MHz, Chloroform-*d*) δ 7.30 (d, *J* = 8.5 Hz, 2H), 7.25 (d, *J* = 8.5 Hz, 2H), 2.01 (s, 3H), 1.51 (s, 1H), 0.08 (s, 9H).

**13C NMR** (126 MHz, Chloroform-*d*) δ 168.3, 138.1, 132.8, 119.1, 118.8, 104.8, 93.7, 24.7, 0.0.

**((4-fluorophenyl)ethynyl)dimethyl(phenyl)silane (3k)**

Prepared according to general procedure F using ((4-fluorophenyl)ethynyl)(methyl)sulfane (33.2 mg, 0.2 mmol), PhMe2SiCl (68.0 mg, 0.4 mmol), CoI2 (6.3 mg, 0.02 mmol), **L8** (7.0 mg, 0.03 mmol), Zn (26.2 mg, 0.4 mmol), DMF (2.0 mL) at room temperature for 4 h. The crude material was purified by flash chromatography on silica gel to provide the title compound **3k** as a colorless oil (47.0 mg, 93% yield). Characterization data matched those reported in the literature.[[12](#_ENREF_16)]

**1H NMR** (400 MHz, Chloroform-*d*) δ 7.76 – 7.69 (m, 2H), 7.51 (ddd, *J* = 8.1, 5.2, 2.5 Hz, 2H), 7.43 (dd, *J* = 4.3, 2.2 Hz, 3H), 7.07 – 6.98 (m, 2H), 0.53 (s, 6H).

**13C NMR** (126 MHz, Chloroform-*d*) δ 162.7 (d, *J* = 250.1 Hz), 136.9, 134.0 (d, *J* = 8.5 Hz), 133.7, 129.5, 127.9, 119.1 (d, *J* = 3.5 Hz), 115.5 (d, *J* = 22.1 Hz), 105.6, 91.8, -0.9.

**19F NMR** (471 MHz, Chloroform-*d*) δ -109.99.

**((2-fluorophenyl)ethynyl)dimethyl(phenyl)silane (3l)**

Prepared according to general procedure F using ((2-fluorophenyl)ethynyl)(methyl)sulfane (33.2 mg, 0.2 mmol), PhMe2SiCl (68.0 mg, 0.4 mmol), CoI2 (6.3 mg, 0.02 mmol), **L8** (7.0 mg, 0.03 mmol), Zn (26.2 mg, 0.4 mmol), DMF (2.0 mL) at room temperature for 4 h. The crude material was purified by flash chromatography on silica gel to provide the title compound **3l** as a colorless oil (35.0 mg, 69% yield). Characterization data matched those reported in the literature.[[13](#_ENREF_17)]

**1H NMR** (500 MHz, Chloroform-*d*) δ 7.76 – 7.69 (m, 2H), 7.53 – 7.48 (m, 1H), 7.44 – 7.40 (m, 3H), 7.35 – 7.29 (m, 1H), 7.11 – 7.06 (m, 2H), 0.53 (s, 6H).

**13C NMR** (126 MHz, Chloroform-*d*) δ 163.1 (d, *J* = 252.4 Hz), 136.7, 133.9, 133.8, 130.4 (d, *J* = 8.0 Hz), 129.5, 127.9, 123.8 (d, *J* = 3.8 Hz), 115.5 (d, *J* = 20.9 Hz), 111.7 (d, *J* = 15.8 Hz), 99.6, 98.0 (d, *J* = 3.3 Hz), -0.9.

**19F NMR** (471 MHz, Chloroform-*d*) δ -109.23.

**4-((trimethylsilyl)ethynyl)benzonitrile (3m)**

Prepared according to general procedure F using 4-((methylthio)ethynyl)benzonitrile (34.6 mg, 0.2 mmol), TMSCl (43.5 mg, 0.4 mmol), CoI2 (6.3 mg, 0.02 mmol), **L8** (7.0 mg, 0.03 mmol), Zn (26.2 mg, 0.4 mmol), DMF (2.0 mL) at room temperature for 4 h. The crude material was purified by flash chromatography on silica gel to provide the title compound **3m** as a white solid (22.0 mg, 55% yield). Characterization data matched those reported in the literature.[[4](#_ENREF_8)]

**1H NMR** (500 MHz, Chloroform-*d*) δ 7.58 (d, *J* = 8.5 Hz, 2H), 7.53 (d, *J* = 8.5 Hz, 2H), 0.26 (s, 9H).

**13C NMR** (126 MHz, Chloroform-*d*) δ 132.4, 131.9, 128.0, 118.4, 111.8, 103.0, 99.6, -0.3.

**methyl 4-((trimethylsilyl)ethynyl)benzoate (3n)**

Prepared according to general procedure F using methyl 4-((methylthio)ethynyl)benzoate (41.2 mg, 0.2 mmol), TMSCl (43.5 mg, 0.4 mmol), CoI2 (6.3 mg, 0.02 mmol), **L8** (7.0 mg, 0.03 mmol), Zn (26.2 mg, 0.4 mmol), DMF (2.0 mL) at room temperature for 4 h. The crude material was purified by flash chromatography on silica gel to provide the title compound **3n** as a yellow oil (26.0 mg, 57% yield). Characterization data matched those reported in the literature.[[14](#_ENREF_18)]

**1H NMR** (500 MHz, Chloroform-*d*) δ 7.96 (d, *J* = 8.2 Hz, 2H), 7.51 (d, *J* = 8.2 Hz, 2H), 3.91 (s, 3H), 0.26 (s, 9H).

**13C NMR** (126 MHz, Chloroform-*d*) δ 166.5, 131.8, 129.7, 129.3, 127.7, 104.0, 97.7, 52.2, -0.2.

**N,N-dimethyl-4-((trimethylsilyl)ethynyl)benzamide (3o)**

Prepared according to general procedure F using N,N-dimethyl-4-((methylthio)ethynyl)benzamide (43.8 mg, 0.2 mmol), TMSCl (43.5 mg, 0.4 mmol), CoI2 (6.3 mg, 0.02 mmol), **L8** (7.0 mg, 0.03 mmol), Zn (26.2 mg, 0.4 mmol), DMF (2.0 mL) at room temperature for 4 h. The crude material was purified by flash chromatography on silica gel to provide the title compound **3o** as a yellow oil (41.0 mg, 84% yield). Characterization data matched those reported in the literature.[[4](#_ENREF_8)]

**1H NMR** (500 MHz, Chloroform-*d*) δ 7.45 (d, *J* = 8.3 Hz, 2H), 7.32 (d, *J* = 8.3 Hz, 2H), 3.03 (s, 3H), 2.93 (s, 3H), 0.22 (s, 9H).

**13C NMR** (126 MHz, Chloroform-*d*) δ 170.8, 136.0, 131.8, 126.9, 124.4, 104.1, 95.7, 39.4, 35.3, -0.2.

**4-((trimethylsilyl)ethynyl)benzoic acid (3p)**

Prepared according to general procedure F using 4-((methylthio)ethynyl)benzoic acid (38.4 mg, 0.2 mmol), TMSCl (43.5 mg, 0.4 mmol), CoI2 (6.3 mg, 0.02 mmol), **L8** (7.0 mg, 0.03 mmol), Zn (26.2 mg, 0.4 mmol), DMF (2.0 mL) at room temperature for 4 h. The crude material was purified by flash chromatography on silica gel to provide the title compound **3p** as a white solid (31.0 mg, 71% yield). Characterization data matched those reported in the literature.[[15](#_ENREF_19)]

**1H NMR** (500 MHz, Chloroform-*d*) δ 8.97 (s, 1H), 8.05 (d, *J* = 8.3 Hz, 2H), 7.55 (d, *J* = 8.3 Hz, 2H), 0.27 (s, 9H).

**13C NMR** (126 MHz, Chloroform-*d*) δ 171.6, 132.0, 130.0, 128.8, 128.7, 103.9, 98.3, -0.2.

**dimethyl(phenyl)((4-vinylphenyl)ethynyl)silane (3q)**

Prepared according to general procedure F using methyl((4-vinylphenyl)ethynyl)sulfane (34.8 mg, 0.2 mmol), PhMe2SiCl (68.0 mg, 0.4 mmol), CoI2 (6.3 mg, 0.02 mmol), **L8** (7.0 mg, 0.03 mmol), Zn (26.2 mg, 0.4 mmol), DMF (2.0 mL) at room temperature for 4 h. The crude material was purified by flash chromatography on silica gel to provide the title compound **3q** as a yellow oil (39.0 mg, 75% yield)**.**

**1H NMR** (500 MHz, Chloroform-*d*) δ 7.68 – 7.59 (m, 2H), 7.39 (d, *J* = 8.2 Hz, 2H), 7.35 – 7.30 (m, 3H), 7.27 (d, *J* = 8.2 Hz, 2H), 6.65 – 6.57 (m, 1H), 5.69 (d, *J* = 17.6 Hz, 1H), 5.22 (d, *J* = 10.9 Hz, 1H), 0.44 (s, 6H).

**13C NMR** (126 MHz, Chloroform-*d*) δ 137.8, 136.2, 133.7, 132.2, 129.4, 127.9, 126.6, 126.0, 122.2, 115.0, 106.8, 92.7, -0.8.

**HRMS-ESI (m/z):** [M+H]+ Calcd for C18H19Si 263.1251; Found: 263.1249.

**((4-ethynylphenyl)ethynyl)dimethyl(phenyl)silane (3r)**

Prepared according to general procedure F using ((4-ethynylphenyl)ethynyl)(methyl)sulfane (34.4 mg, 0.2 mmol), PhMe2SiCl (68.0 mg, 0.4 mmol), CoI2 (6.3 mg, 0.02 mmol), **L8** (7.0 mg, 0.03 mmol), Zn (26.2 mg, 0.4 mmol), DMF (2.0 mL) at room temperature for 4 h. The crude material was purified by flash chromatography on silica gel to provide the title compound **3r** as a white solid (46.0 mg, 88% yield)**.**

**1H NMR** (400 MHz, Chloroform-*d*) δ 7.72 – 7.67 (m, 2H), 7.46 – 7.39 (m, 7H), 3.18 (s, 1H), 0.51 (s, 6H).

**13C NMR** (126 MHz, Chloroform-*d*) δ 136.7, 133.7, 131.9, 129.5, 127.9, 126.0, 123.3, 122.3, 105.9, 94.4, 83.1, 79.1, -0.9.

**Melting point**: 85-86 °C

**HRMS-ESI (m/z):** [M+H]+ Calcd for C18H17Si 261.1094; Found: 261.1091.

**3-(4-((trimethylsilyl)ethynyl)phenoxy)propan-1-ol (3s)**

Prepared according to general procedure F using 3-(4-((methylthio)ethynyl)phenyl)propan-1-ol (41.2 mg, 0.2 mmol), TMSCl (43.5 mg, 0.4 mmol), CoI2 (6.3 mg, 0.02 mmol), **L8** (7.0 mg, 0.03 mmol), Zn (26.2 mg, 0.4 mmol), DMF (2.0 mL) at room temperature for 4 h. The crude material was purified by flash chromatography on silica gel to provide the title compound **3s** as a yellow oil (36.0 mg, 73% yield). Characterization data matched those reported in the literature.[[16](#_ENREF_20)]

**1H NMR** (400 MHz, Chloroform-*d*) δ 7.42 – 7.37 (m, 2H), 6.83 – 6.79 (m, 2H), 4.10 (t, *J* = 6.0 Hz, 2H), 3.85 (t, *J* = 5.9 Hz, 2H), 2.05 – 2.01 (m, 2H), 1.88 (s, 1H), 0.23 (s, 9H).

**13C NMR** (126 MHz, Chloroform-*d*) δ 158.9, 133.5, 115.3, 114.3, 105.1, 92.5, 65.5, 60.2, 31.8, 0.0.

**N-ethyl-4-((trimethylsilyl)ethynyl)aniline (3t)**

Prepared according to general procedure F using N-ethyl-4-((methylthio)ethynyl)aniline (38.2 mg, 0.2 mmol), TMSCl (43.5 mg, 0.4 mmol), CoI2 (6.3 mg, 0.02 mmol), **L8** (7.0 mg, 0.03 mmol), Zn (26.2 mg, 0.4 mmol), DMF (2.0 mL) at room temperature for 4 h. The crude material was purified by flash chromatography on silica gel to provide the title compound **3t** as a brown solid (25.0 mg, 58% yield)**.**

**1H NMR** (500 MHz, Chloroform-*d*) δ 7.06 (d, *J* = 8.7 Hz, 2H), 6.25 (d, *J* = 8.6 Hz, 2H), 3.54 (s, 1H), 2.92 (q, *J* = 7.2 Hz, 2H), 1.02 (t, *J* = 7.1 Hz, 3H), 0.00 (s, 9H).

**13C NMR** (126 MHz, Chloroform-*d*) δ 148.5, 133.3, 112.0, 110.8, 106.5, 91.0, 38.1, 14.7, 0.2.

**Melting point**: 88-89 °C

**HRMS-ESI (m/z):** [M+H]+ Calcd for C13H20NSi 218.1359; Found: 218.1360.

**dimethyl(phenyl)(4-phenylbut-1-yn-1-yl)silane (3u)**

Prepared according to general procedure F using methyl(4-phenylbut-1-yn-1-yl)sulfane (35.2 mg, 0.2 mmol), PhMe2SiCl (68.0 mg, 0.4 mmol), CoI2 (6.3 mg, 0.02 mmol), **L8** (7.0 mg, 0.03 mmol), Zn (26.2 mg, 0.4 mmol), DMF (2.0 mL) at room temperature for 4 h. The crude material was purified by flash chromatography on silica gel to provide the title compound **3u** as a colorless oil (51.0 mg, 97% yield). Characterization data matched those reported in the literature.[[12](#_ENREF_16)]

**1H NMR** (500 MHz, Chloroform-*d*) δ 7.57 – 7.49 (m, 2H), 7.33 – 7.27 (m, 3H), 7.22 (t, *J* = 7.5 Hz, 2H), 7.16 (d, *J* = 7.3 Hz, 3H), 2.80 (t, *J* = 7.5 Hz, 2H), 2.50 (t, *J* = 7.5 Hz, 2H), 0.33 (s, 6H).

**13C NMR** (126 MHz, Chloroform-*d*) δ 140.5, 137.4, 133.6, 129.2, 128.5, 128.3, 127.8, 126.3, 108.5, 83.3, 34.9, 22.2, -0.7.

**(cyclohexylethynyl)dimethyl(phenyl)silane (3v)**

Prepared according to general procedure F using (cyclohexylethynyl)(methyl)sulfane (30.8 mg, 0.2 mmol), TMSCl (43.5 mg, 0.4 mmol), CoI2 (6.3 mg, 0.02 mmol), **L8** (7.0 mg, 0.03 mmol), Zn (26.2 mg, 0.4 mmol), DMF (2.0 mL) at room temperature for 4 h. The crude material was purified by flash chromatography on silica gel to provide the title compound **3v** as a colorless oil (42.0 mg, 86% yield). Characterization data matched those reported in the literature.[[12](#_ENREF_16)]

**1H NMR** (400 MHz, Chloroform-*d*) δ 7.74 – 7.64 (m, 2H), 7.42 – 7.38 (m, 3H), 2.50 (t, *J* = 8.9 Hz, 1H), 1.93 – 1.83 (m, 2H), 1.82 – 1.72 (m, 2H), 1.59 – 1.49 (m, 3H), 1.41 – 1.30 (m, 3H), 0.43 (s, 6H).

**13C NMR** (101 MHz, Chloroform-*d*) δ 137.9, 133.7, 129.1, 127.7, 113.7, 81.6, 32.5, 30.1, 25.8, 24.8, -0.5.

**(3,3-dimethylbut-1-yn-1-yl)dimethyl(phenyl)silane (3w)**

Prepared according to general procedure F using (3,3-dimethylbut-1-yn-1-yl)(methyl)sulfane (25.6 mg, 0.2 mmol), TMSCl (43.5 mg, 0.4 mmol), CoI2 (6.3 mg, 0.02 mmol), **L8** (7.0 mg, 0.03 mmol), Zn (26.2 mg, 0.4 mmol), DMF (2.0 mL) at room temperature for 4 h. The crude material was purified by flash chromatography on silica gel to provide the title compound **3w** as a colorless oil (35.0 mg, 81% yield). Characterization data matched those reported in the literature.[[17](#_ENREF_21)]

**1H NMR** (400 MHz, Chloroform-*d*) δ 7.68 – 7.62 (m, 2H), 7.41 – 7.36 (m, 3H), 1.28 (s, 9H), 0.38 (s, 6H).

**13C NMR** (101 MHz, Chloroform-*d*) δ 138.0, 133.7, 129.1, 127.7, 118.0, 79.6, 30.9, 28.2, -0.4.

**(cyclohex-1-en-1-ylethynyl)dimethyl(phenyl)silane (3x)**

Prepared according to general procedure F using (cyclohex-1-en-1-ylethynyl)(methyl)sulfane (30.4 mg, 0.2 mmol), TMSCl (43.5 mg, 0.4 mmol), CoI2 (6.3 mg, 0.02 mmol), **L8** (7.0 mg, 0.03 mmol), Zn (26.2 mg, 0.4 mmol), DMF (2.0 mL) at room temperature for 4 h. The crude material was purified by flash chromatography on silica gel to provide the title compound **3x** as a colorless oil (45.0 mg, 94% yield). Characterization data matched those reported in the literature.[[13](#_ENREF_17)]

**1H NMR** (400 MHz, Chloroform-*d*) δ 7.72 – 7.59 (m, 2H), 7.40 – 7.36 (m, 3H), 6.27 – 6.22 (m, 1H), 2.20 – 2.14 (m, 2H), 2.14 – 2.08 (m, 2H), 1.68 – 1.57 (m, 4H), 0.43 (s, 6H).

**13C NMR** (101 MHz, Chloroform-*d*) δ 137.5, 136.7, 133.7, 129.2, 127.8, 120.7, 109.0, 88.7, 29.0, 25.7, 22.2, 21.4, -0.7.

**(E)-trimethyl(4-phenylbut-3-en-1-yn-1-yl)silane (3y)**

Prepared according to general procedure F using (E)-methyl(4-phenylbut-3-en-1-yn-1-yl)sulfane (34.8 mg, 0.2 mmol), TMSCl (43.5 mg, 0.4 mmol), CoI2 (6.3 mg, 0.02 mmol), **L8** (7.0 mg, 0.03 mmol), Zn (26.2 mg, 0.4 mmol), DMF (2.0 mL) at room temperature for 4 h. The crude material was purified by flash chromatography on silica gel to provide the title compound **3y** as a yellow oil (31.0 mg, 78% yield). Characterization data matched those reported in the literature.[[4](#_ENREF_8)]

**1H NMR** (500 MHz, Chloroform-*d*) δ 7.38 (d, *J* = 7.1 Hz, 2H), 7.35 – 7.27 (m, 3H), 7.01 (d, *J* = 16.3 Hz, 1H), 6.18 (d, *J* = 16.3 Hz, 1H), 0.24 (s, 9H).

**13C NMR** (126 MHz, Chloroform-*d*) δ 142.4, 136.1, 128.74, 128.7, 126.3, 108.0, 104.4, 96.9, -0.1.

**((9H-fluoren-2-yl)ethynyl)trimethylsilane (3z)**

Prepared according to general procedure F using ((9H-fluoren-2-yl)ethynyl)(methyl)sulfane (47.2 mg, 0.2 mmol), TMSCl (43.5 mg, 0.4 mmol), CoI2 (6.3 mg, 0.02 mmol), **L8** (7.0 mg, 0.03 mmol), Zn (26.2 mg, 0.4 mmol), DMF (2.0 mL) at room temperature for 4 h. The crude material was purified by flash chromatography on silica gel to provide the title compound **3z** as a white solid (46.0 mg, 88% yield). Characterization data matched those reported in the literature.[[4](#_ENREF_8)]

**1H NMR** (500 MHz, Chloroform-*d*) δ 7.77 (d, *J* = 7.5 Hz, 1H), 7.71 (d, *J* = 7.9 Hz, 1H), 7.67 (s, 1H), 7.58 – 7.50 (m, 2H), 7.39 (t, *J* = 7.4 Hz, 1H), 7.33 (t, *J* = 7.4 Hz, 1H), 3.88 (s, 2H), 0.31 (s, 9H).

**13C NMR** (126 MHz, Chloroform-*d*) δ 143.6, 143.0, 142.0, 141.0, 130.8, 128.5, 127.2, 126.9, 125.0, 121.1, 120.2, 119.6, 105.9, 94.0, 36.7, 0.

**trimethyl(naphthalen-2-ylethynyl)silane (3aa)**

Prepared according to general procedure F using methyl(naphthalen-2-ylethynyl)sulfane (39.6 mg, 0.2 mmol), TMSCl (43.5 mg, 0.4 mmol), CoI2 (6.3 mg, 0.02 mmol), **L8** (7.0 mg, 0.03 mmol), Zn (26.2 mg, 0.4 mmol), DMF (2.0 mL) at room temperature for 4 h. The crude material was purified by flash chromatography on silica gel to provide the title compound **3aa** as a white solid (36.0 mg, 80% yield). Characterization data matched those reported in the literature.[[4](#_ENREF_8)]

**1H NMR** (500 MHz, Chloroform-*d*) δ 8.02 (s, 1H), 7.82 – 7.75 (m, 3H), 7.53 – 7.47 (m, 3H), 0.31 (s, 9H).

**13C NMR** (126 MHz, Chloroform-*d*) δ 132.89, 132.86, 132.0, 128.6, 127.8, 127.77, 127.72, 126.7, 126.5, 120.4, 105.5, 94.5, 0.0.

dimethyl(phenyl)(thiophen-2-ylethynyl)silane **(3ab)**

Prepared according to general procedure F using 2-((methylthio)ethynyl)thiophene (30.8 mg, 0.2 mmol), TMSCl (43.5 mg, 0.4 mmol), CoI2 (6.3 mg, 0.02 mmol), **L8** (7.0 mg, 0.03 mmol), Zn (26.2 mg, 0.4 mmol), DMF (2.0 mL) at room temperature for 4 h. The crude material was purified by flash chromatography on silica gel to provide the title compound **3ab** as a yellow oil (38.0 mg, 78% yield). Characterization data matched those reported in the literature.[[18](#_ENREF_22)]

**1H NMR** (400 MHz, Chloroform-*d*) δ 7.74 – 7.67 (m, 2H), 7.45 – 7.40 (m, 3H), 7.32 – 7.29 (m, 1H), 7.28 – 7.26 (m, 1H), 7.00 – 6.96 (m, 1H), 0.53 (s, 6H).

**13C NMR** (126 MHz, Chloroform-*d*) δ 136.6, 133.7, 132.9, 129.5, 127.9, 127.6, 126.9, 122.9, 99.1, 96.6, -1.0.

dimethyl(phenyl)(thiophen-3-ylethynyl)silane **(3ac)**

Prepared according to general procedure F using 3-((methylthio)ethynyl)thiophene (30.8 mg, 0.2 mmol), TMSCl (43.5 mg, 0.4 mmol), CoI2 (6.3 mg, 0.02 mmol), **L8** (7.0 mg, 0.03 mmol), Zn (26.2 mg, 0.4 mmol), DMF (2.0 mL) at room temperature for 4 h. The crude material was purified by flash chromatography on silica gel to provide the title compound **3ac** as a colorless oil (41.0 mg, 85% yield). Characterization data matched those reported in the literature.[[13](#_ENREF_17)]

**1H NMR** (500 MHz, Chloroform-*d*) δ 7.65 – 7.60 (m, 2H), 7.45 (d, *J* = 2.8 Hz, 1H), 7.35 – 7.31 (m, 3H), 7.18 – 7.15 (m, 1H), 7.09 (d, *J* = 5.0 Hz, 1H), 0.43 (s, 6H).

**13C NMR** (126 MHz, Chloroform-*d*) δ 136.9, 133.7, 130.1, 129.9, 129.4, 127.9, 125.2, 122.2, 101.6, 91.8, -0.8.

3-((dimethyl(phenyl)silyl)ethynyl)pyridine **(3ad)**

Prepared according to general procedure F using 3-((methylthio)ethynyl)pyridine (29.8 mg, 0.2 mmol), TMSCl (43.5 mg, 0.4 mmol), CoI2 (6.3 mg, 0.02 mmol), **L8** (7.0 mg, 0.03 mmol), Zn (26.2 mg, 0.4 mmol), DMF (2.0 mL) at room temperature for 4 h. The crude material was purified by flash chromatography on silica gel to provide the title compound **3ad** as a colorless oil (31.0 mg, 65% yield). Characterization data matched those reported in the literature.[[12](#_ENREF_16)]

**1H NMR** (400 MHz, Chloroform-*d*) δ 8.78 – 8.74 (m, 1H), 8.57 (dd, *J* = 4.9, 1.6 Hz, 1H), 7.83 – 7.77 (m, 1H), 7.71 (dd, *J* = 7.3, 2.2 Hz, 2H), 7.43 (dd, *J* = 4.9, 1.8 Hz, 3H), 7.29 – 7.24 (m, 1H), 0.54 (s, 6H).

**13C NMR** (101 MHz, Chloroform-*d*) δ 152.7, 148.9, 138.9, 136.4, 133.7, 129.6, 128.0, 122.9, 120.1, 103.0, 96.2, -1.0.

**6-((trimethylsilyl)ethynyl)quinoline (3ae)**

Prepared according to general procedure F using 6-((methylthio)ethynyl)quinoline (39.8 mg, 0.2 mmol), TMSCl (43.5 mg, 0.4 mmol), CoI2 (6.3 mg, 0.02 mmol), **L8** (7.0 mg, 0.03 mmol), Zn (26.2 mg, 0.4 mmol), DMF (2.0 mL) at room temperature for 4 h. The crude material was purified by flash chromatography on silica gel to provide the title compound **3ae** as a yellow oil (20.0 mg, 44% yield)**.**

**1H NMR** (500 MHz, Chloroform-*d*) δ 8.89 (d, *J* = 3.0 Hz, 1H), 8.09 (d, *J* = 8.2 Hz, 1H), 8.03 (d, *J* = 8.7 Hz, 1H), 7.96 (s, 1H), 7.78 – 7.71 (m, 1H), 7.43 – 7.38 (m, 1H), 0.28 (s, 9H).

**13C NMR** (126 MHz, Chloroform-*d*) δ 150.9, 147.6, 135.9, 132.4, 131.6, 129.4, 127.9, 121.7, 121.5, 104.4, 95.9, -0.1.

**HRMS-ESI (m/z):** [M+H]+ Calcd for C14H16NSi 226.1047; Found: 226.1044.

**(benzofuran-5-ylethynyl)trimethylsilane (3af)**

Prepared according to general procedure F using 5-((methylthio)ethynyl)benzofuran (37.6 mg, 0.2 mmol), TMSCl (43.5 mg, 0.4 mmol), CoI2 (6.3 mg, 0.02 mmol), **L8** (7.0 mg, 0.03 mmol), Zn (26.2 mg, 0.4 mmol), DMF (2.0 mL) at room temperature for 4 h. The crude material was purified by flash chromatography on silica gel to provide the title compound **3af** as a yellow oil (37.0 mg, 86% yield)**.**

**1H NMR** (500 MHz, Chloroform-*d*) δ 7.74 (s, 1H), 7.62 (d, *J* = 2.1 Hz, 1H), 7.42 (s, 2H), 6.73 (d, *J* = 2.1 Hz, 1H), 0.27 (s, 9H).

**13C NMR** (126 MHz, Chloroform-*d*) δ 154.7, 145.8, 128.4, 127.4, 125.2, 117.7, 111.4, 106.5, 105.5, 92.5, 0.0.

**HRMS-ESI (m/z):** [M+H]+ Calcd for C13H15OSi 215.0887; Found: 215.0884.

**1-methyl-5-((trimethylsilyl)ethynyl)-1H-indole (3ag)**

Prepared according to general procedure F using 1-methyl-5-((methylthio)ethynyl)-1H-indole (40.2 mg, 0.2 mmol), TMSCl (43.5 mg, 0.4 mmol), CoI2 (6.3 mg, 0.02 mmol), **L8** (7.0 mg, 0.03 mmol), Zn (26.2 mg, 0.4 mmol), DMF (2.0 mL) at room temperature for 4 h. The crude material was purified by flash chromatography on silica gel to provide the title compound **3ag** as a dark-brown oil (38.0 mg, 84% yield). Characterization data matched those reported in the literature.[[4](#_ENREF_8)]

**1H NMR** (500 MHz, Chloroform-*d*) δ 7.81 (s, 1H), 7.37 – 7.33 (m, 1H), 7.23 (d, *J* = 8.5 Hz, 1H), 7.05 (d, *J* = 3.1 Hz, 1H), 6.46 (d, *J* = 3.0 Hz, 1H), 3.76 (s, 3H), 0.29 (s, 9H).

**13C NMR** (126 MHz, Chloroform-*d*) δ 136.4, 129.7, 128.1, 125.4, 125.3, 113., 109.1, 107.1, 101.3, 91.0, 32.8, 0.2.

**(benzo[b]thiophen-5-ylethynyl)trimethylsilane (3ah)**

Prepared according to general procedure F using 5-((methylthio)ethynyl)benzo[b]thiophene (40.8 mg, 0.2 mmol), TMSCl (43.5 mg, 0.4 mmol), CoI2 (6.3 mg, 0.02 mmol), **L8** (7.0 mg, 0.03 mmol), Zn (26.2 mg, 0.4 mmol), DMF (2.0 mL) at room temperature for 4 h. The crude material was purified by flash chromatography on silica gel to provide the title compound **3ah** as a white solid (35.0 mg, 76% yield). Characterization data matched those reported in the literature.[[10](#_ENREF_14)]

**1H NMR** (500 MHz, Chloroform-*d*) δ 7.96 (s, 1H), 7.80 (d, *J* = 8.3 Hz, 1H), 7.47 – 7.41 (m, 2H), 7.29 (d, *J* = 5.4 Hz, 1H), 0.28 (s, 9H).

**13C NMR** (126 MHz, Chloroform-*d*) δ 139.8, 139.4, 127.6, 127.4, 127.3, 123.6, 122.3, 119.0, 105.4, 93.6, 0.0.

**9-methyl-2-((trimethylsilyl)ethynyl)-9H-carbazole (3ai)**

Prepared according to general procedure F using 9-methyl-2-((methylthio)ethynyl)-9H-carbazole (50.2 mg, 0.2 mmol), TMSCl (43.5 mg, 0.4 mmol), CoI2 (6.3 mg, 0.02 mmol), **L8** (7.0 mg, 0.03 mmol), Zn (26.2 mg, 0.4 mmol), DMF (2.0 mL) at room temperature for 4 h. The crude material was purified by flash chromatography on silica gel to provide the title compound **3ai** as a yellow solid (49.0 mg, 88% yield)**.**

**1H NMR** (500 MHz, Chloroform-*d*) δ 8.05 – 8.03 (m, 1H), 7.85 (d, *J* = 7.7 Hz, 1H), 7.39 (dd, *J* = 8.4, 1.5 Hz, 1H), 7.30 – 7.26 (m, 1H), 7.15 (d, *J* = 8.2 Hz, 1H), 7.08 – 7.04 (m, 2H), 3.58 (s, 3H), 0.12 (s, 9H).

**13C NMR** (126 MHz, Chloroform-*d*) δ 141.3, 140.6, 129.6, 126.1, 124.4, 122.6, 122.3, 120.4, 119.4, 113.1, 108.6, 108.3, 106.7, 91.6, 29.0, 0.2.

**Melting point**: 86-87 °C

**HRMS-ESI (m/z):** [M+H]+ Calcd for C18H20NSi 278.1360; Found: 278.1357.

**(dibenzo[b,d]furan-3-ylethynyl)trimethylsilane (3aj)**

Prepared according to general procedure F using 3-((methylthio)ethynyl)dibenzo[b,d]furan (47.6 mg, 0.2 mmol), TMSCl (43.5 mg, 0.4 mmol), CoI2 (6.3 mg, 0.02 mmol), **L8** (7.0 mg, 0.03 mmol), Zn (26.2 mg, 0.4 mmol), DMF (2.0 mL) at room temperature for 4 h. The crude material was purified by flash chromatography on silica gel to provide the title compound **3aj** as a white solid (45.0 mg, 85% yield). Characterization data matched those reported in the literature.[[19](#_ENREF_23)]

**1H NMR** (500 MHz, Chloroform-*d*) δ 7.90 (s, 1H), 7.73 (d, *J* = 7.7 Hz, 1H), 7.41 – 7.36 (m, 2H), 7.32 – 7.26 (m, 2H), 7.16 (d, *J* = 7.5 Hz, 1H), 0.12 (s, 9H).

**13C NMR** (126 MHz, Chloroform-*d*) δ 156.6, 155.9, 131.2, 127.6, 124.5, 124.3, 123.6, 123.0, 120.7, 117.7, 111.8, 111.6, 105.2, 93.1, 0.0.

**5,6-dimethoxy-2-((1-(4-((trimethylsilyl)ethynyl)benzoyl)piperidin-4-yl)methyl)-2,3-dihydro-1H-inden-1-one (3ak)**

Prepared according to general procedure F using 5,6-dimethoxy-2-((1-(4-((methylthio)ethynyl)benzoyl)piperidin-4-yl)methyl)-2,3-dihydro-1H-inden-1-one (92.6 mg, 0.2 mmol), TMSCl (43.5 mg, 0.4 mmol), CoI2 (6.3 mg, 0.02 mmol), **L8** (7.0 mg, 0.03 mmol), Zn (26.2 mg, 0.4 mmol), DMF (2.0 mL) at room temperature for 4 h. The crude material was purified by flash chromatography on silica gel to provide the title compound **3ak** as a yellow solid (64.0 mg, 65% yield)**.**

**1H NMR** (500 MHz, Chloroform-*d*) δ 7.47 (d, *J* = 8.1 Hz, 2H), 7.32 (d, *J* = 8.1 Hz, 2H), 7.15 (s, 1H), 6.85 (s, 1H), 4.68 (s, 1H), 3.95 (s, 3H), 3.89 (s, 3H), 3.68 (s, 1H), 3.29 – 3.21 (m, 1H), 3.00 – 2.66 (m, 4H), 1.97 – 1.55 (m, 5H), 1.43 – 1.30 (m, 2H), 0.24 (d, *J* = 1.6 Hz, 9H).

**13C NMR** (126 MHz, Chloroform-*d*) δ 207.2, 169.6, 149.5, 148.5, 136.0, 131.9, 129.1, 126.8, 124.4, 107.3, 104.4, 104.2, 95.8, 56.2, 56.1, 45.0, 38.5, 34.6, 33.3, 30.6, 29.6, -0.2.

**Melting point**: 147-148 °C

**HRMS-ESI (m/z):** [M+H]+ Calcd for C29H36NO4Si 490.2408; Found: 490.2403.

**(4-(8-chloro-5,6-dihydro-11H-benzo[5,6]cyclohepta[1,2-b]pyridin-11-ylidene)piperidin-1-yl)(4-((trimethylsilyl)ethynyl)phenyl)methanone (3al)**

Prepared according to general procedure F using (4-(8-chloro-5,6-dihydro-11H-benzo[5,6]cyclohepta[1,2-b]pyridin-11-ylidene)piperidin-1-yl)(4-((methylthio)ethynyl)phenyl)methanone (96.8 mg, 0.2 mmol), TMSCl (43.5 mg, 0.4 mmol), CoI2 (6.3 mg, 0.02 mmol), **L8** (7.0 mg, 0.03 mmol), Zn (26.2 mg, 0.4 mmol), DMF (2.0 mL) at room temperature for 4 h. The crude material was purified by flash chromatography on silica gel to provide the title compound **3al** as a yellow oil (42.0 mg, 41% yield)**.**

**1H NMR** (500 MHz, Chloroform-*d*) δ 8.23 (s, 1H), 7.32 (d, *J* = 8.2 Hz, 3H), 7.19 (d, *J* = 8.2 Hz, 2H), 6.99 (d, *J* = 26.2 Hz, 4H), 4.09 – 3.92 (m, 1H), 3.56 – 3.34 (m, 1H), 3.29 – 3.14 (m, 3H), 2.73 – 2.63 (m, 2H), 2.37 – 2.03 (m, 4H), 1.12 – 1.09 (m, 1H), 0.09 (s, 9H).

**13C NMR** (126 MHz, Chloroform-*d*) δ 169.7, 156.5, 146.4, 139.4, 137.9, 137.4, 136.8, 135.7, 134.5, 133.5, 133.1, 131.9, 130.4, 129.0, 126.8, 126.2, 124.6, 122.4, 104.1, 95.9, 48.5, 43.3, 31.6, 31.5, 29.7, 14.2, -0.2.

**HRMS-ESI (m/z):** [M+H]+ Calcd for C31H32ClN2OSi 511.1967; Found: 511.1964.

**3,7-dimethyloct-6-en-1-yl 4-((trimethylsilyl)ethynyl)benzoate (3am)**

Prepared according to general procedure F using 3,7-dimethyloct-6-en-1-yl 4-((methylthio)ethynyl)benzoate (66.0 mg, 0.2 mmol), TMSCl (43.5 mg, 0.4 mmol), CoI2 (6.3 mg, 0.02 mmol), **L8** (7.0 mg, 0.03 mmol), Zn (26.2 mg, 0.4 mmol), DMF (2.0 mL) at room temperature for 4 h. The crude material was purified by flash chromatography on silica gel to provide the title compound **3am** as a yellow oil (37.0 mg, 52% yield)**.**

**1H NMR** (500 MHz, Chloroform-*d*) δ 7.96 (d, *J* = 8.5 Hz, 2H), 7.51 (d, *J* = 8.5 Hz, 2H), 5.12 – 5.07 (m, 1H), 4.38 – 4.32 (m, 2H), 2.06 – 1.95 (m, 2H), 1.85 – 1.77 (m, 1H), 1.67 (s, 3H), 1.66 – 1.62 (m, 1H), 1.60 (s, 3H), 1.43 – 1.37 (m, 1H), 1.32 – 1.17 (m, 2H), 0.97 (d, *J* = 6.5 Hz, 3H), 0.26 (s, 9H).

**13C NMR** (126 MHz, Chloroform-*d*) δ 166.1, 131.8, 131.4, 130.1, 129.3, 127.6, 124.5, 104.1, 97.6, 63.7, 37.0, 35.5, 29.5, 25.7, 25.4, 19.5, 17.6, -0.2.

**HRMS-ESI (m/z):** [M+H]+ Calcd for C22H33O2Si 357.2244; Found: 357.2240.

**(1R,2S,5R)-2-isopropyl-5-methylcyclohexyl 4-((trimethylsilyl)ethynyl)benzoate (3an)**

Prepared according to general procedure F using (1R,2S,5R)-2-isopropyl-5-methylcyclohexyl 4-((methylthio)ethynyl)benzoate (66.0 mg, 0.2 mmol), TMSCl (43.5 mg, 0.4 mmol), CoI2 (6.3 mg, 0.02 mmol), **L8** (7.0 mg, 0.03 mmol), Zn (26.2 mg, 0.4 mmol), DMF (2.0 mL) at room temperature for 4 h. The crude material was purified by flash chromatography on silica gel to provide the title compound **3an** as a yellow oil (40.0 mg, 56% yield). Characterization data matched those reported in the literature.[[20](#_ENREF_24)]

**1H NMR** (500 MHz, Chloroform-*d*) δ 7.97 (d, *J* = 8.4 Hz, 2H), 7.51 (d, *J* = 8.4 Hz, 2H), 4.97 – 4.89 (m, 1H), 2.12 (d, *J* = 11.8 Hz, 1H), 1.99 – 1.90 (m, 1H), 1.73 (d, *J* = 11.5 Hz, 2H), 1.60 – 1.51 (m, 2H), 1.17 – 1.05 (m, 2H), 0.95 – 0.88 (m, 7H), 0.79 (d, *J* = 7.0 Hz, 3H), 0.26 (s, 9H).

**13C NMR** (126 MHz, Chloroform-*d*) δ 165.5, 131.8, 130.4, 129.3, 127.5, 104.2, 97.4, 75.1, 47.2, 40.9, 34.3, 31.4, 26.5, 23.6, 22.0, 20.7, 16.5, -0.2.

**4-((trimethylsilyl)ethynyl)phenyl 5-(2,5-dimethylphenoxy)-2,2-dimethylpentanoate (3ao)**

Prepared according to general procedure F using 4-((methylthio)ethynyl)phenyl 5-(2,5-dimethylphenoxy)-2,2-dimethylpentanoate (79.2 mg, 0.2 mmol), TMSCl (43.5 mg, 0.4 mmol), CoI2 (6.3 mg, 0.02 mmol), **L8** (7.0 mg, 0.03 mmol), Zn (26.2 mg, 0.4 mmol), DMF (2.0 mL) at room temperature for 4 h. The crude material was purified by flash chromatography on silica gel to provide the title compound **3ao** as a white solid (70.0 mg, 83% yield)**.**

**1H NMR** (500 MHz, Chloroform-*d*) δ 7.48 (d, *J* = 8.7 Hz, 2H), 7.02 (d, *J* = 7.5 Hz, 1H), 6.99 (d, *J* = 8.7 Hz, 2H), 6.69 (d, *J* = 7.3 Hz, 1H), 6.65 (s, 1H), 4.00 (t, *J* = 5.1 Hz, 2H), 2.33 (s, 3H), 2.19 (s, 3H), 1.93 – 1.85 (m, 4H), 1.38 (s, 6H), 0.27 (s, 9H).

**13C NMR** (126 MHz, Chloroform-*d*) δ 176.0, 156.9, 151.1, 136.5, 133.1, 130.4, 123.7, 121.6, 120.9, 120.7, 112.0, 104.4, 94.2, 67.8, 42.5, 37.2, 25.3, 25.2, 21.4, 15.8, 0.0.

**Melting point**: 66-67 °C

**HRMS-ESI (m/z):** [M+H]+ Calcd for C26H35O3Si 423.2350; Found: 423.2344.

**(3S,8S,9S,10R,13R,14S,17R)-10,13-dimethyl-17-((R)-6-methylheptan-2-yl)-2,3,4,7,8,9,10,11,12,13,14,15,16,17-tetradecahydro-1H-cyclopenta[a]phenanthren-3-yl 4-((trimethylsilyl)ethynyl)benzoate (3ap)**

Prepared according to general procedure F using (3S,8S,9S,10R,13R,14S,17R)-10,13-dimethyl-17-((R)-6-methylheptan-2-yl)-2,3,4,7,8,9,10,11,12,13,14,15,16,17-tetradecahydro-1H-cyclopenta[a]phenanthren-3-yl 4-((methylthio)ethynyl)benzoate (112.0 mg, 0.2 mmol), TMSCl (43.5 mg, 0.4 mmol), CoI2 (6.3 mg, 0.02 mmol), **L8** (7.0 mg, 0.03 mmol), Zn (26.2 mg, 0.4 mmol), DMF (2.0 mL) at room temperature for 4 h. The crude material was purified by flash chromatography on silica gel to provide the title compound **3ap** as a white solid (72.0 mg, 62% yield)**.**

**1H NMR** (500 MHz, Chloroform-*d*) δ 7.96 (d, *J* = 8.4 Hz, 2H), 7.50 (d, *J* = 8.4 Hz, 2H), 5.42 (d, *J* = 3.6 Hz, 1H), 4.88 – 4.81 (m, 1H), 2.48 – 2.44 (m, 2H), 2.04 – 1.97 (m, 3H), 1.93 – 1.89 (m, 1H), 1.87 – 1.81 (m, 1H), 1.76 – 1.69 (m, 1H), 1.64 – 1.55 (m, 3H), 1.53 – 1.45 (m, 4H), 1.39 – 1.32 (m, 3H), 1.26 (t, *J* = 10.1 Hz, 2H), 1.22 – 1.17 (m, 2H), 1.14 – 1.09 (m, 3H), 1.06 (s, 3H), 1.03 – 0.98 (m, 3H), 0.92 (d, *J* = 6.5 Hz, 3H), 0.88 – 0.86 (m, 6H), 0.69 (s, 3H), 0.26 (s, 9H).

**13C NMR** (126 MHz, Chloroform-*d*) δ 165.4, 139.6, 131.8, 130.4, 129.3, 127.5, 122.8, 104.2, 97.4, 74.8, 56.7, 56.2, 50.1, 42.3, 39.7, 39.5, 38.2, 37.0, 36.6, 36.2, 35.8, 31.9, 31.9, 28.2, 28.0, 27.9, 24.3, 23.8, 22.8, 22.6, 21.1, 19.4, 18.7, 11.9, -0.2.

**Melting point**: 200-201 °C

**HRMS-ESI (m/z):** [M+H]+ Calcd for C39H59O2Si 587.4279; Found: 587.4275.

**((4-chlorophenyl)ethynyl)trimethylsilane (3aq)**

Prepared according to general procedure F using ((4-chlorophenyl)ethynyl)(methyl)sulfane (36.4 mg, 0.2 mmol), TMSCl (43.5 mg, 0.4 mmol), CoI2 (6.3 mg, 0.02 mmol), **L8** (7.0 mg, 0.03 mmol), Zn (26.2 mg, 0.4 mmol), DMF (2.0 mL) at room temperature for 4 h. The crude material was purified by flash chromatography on silica gel to provide the title compound **3aq** as a colorless solid (31.0 mg, 75% yield). Characterization data matched those reported in the literature.[[8](#_ENREF_12)]

**1H NMR** (500 MHz, Chloroform-*d*) δ 7.26 (d, *J* = 8.5 Hz, 2H), 7.14 (d, *J* = 8.5 Hz, 2H), 0.12 (s, 9H).

**13C NMR** (126 MHz, Chloroform-*d*) δ 134.5, 133.2, 128.5, 121.6, 103.8, 95.3, -0.1.

**((4-bromophenyl)ethynyl)trimethylsilane (3ar)**

Prepared according to general procedure F using ((4-bromophenyl)ethynyl)(methyl)sulfane (45.2 mg, 0.2 mmol), TMSCl (43.5 mg, 0.4 mmol), CoI2 (6.3 mg, 0.02 mmol), **L8** (7.0 mg, 0.03 mmol), Zn (26.2 mg, 0.4 mmol), DMF (2.0 mL) at room temperature for 4 h. The crude material was purified by flash chromatography on silica gel to provide the title compound **3ar** as a colorless solid (40.0 mg, 80% yield). Characterization data matched those reported in the literature.[[8](#_ENREF_12)]

**1H NMR** (500 MHz, Chloroform-*d*) δ 7.43 (d, *J* = 8.4 Hz, 2H), 7.32 (d, *J* = 8.4 Hz, 2H), 0.25 (s, 9H).

**13C NMR** (126 MHz, Chloroform-*d*) δ 133.4, 131.5, 122.7, 122.1, 103.9, 95.6, -0.1.

**((2-bromophenyl)ethynyl)trimethylsilane (3as)**

Prepared according to general procedure F using ((2-bromophenyl)ethynyl)(methyl)sulfane (45.2 mg, 0.2 mmol), TMSCl (43.5 mg, 0.4 mmol), CoI2 (6.3 mg, 0.02 mmol), **L8** (7.0 mg, 0.03 mmol), Zn (26.2 mg, 0.4 mmol), DMF (2.0 mL) at room temperature for 4 h. The crude material was purified by flash chromatography on silica gel to provide the title compound **3as** as a yellow oil (37.0 mg, 74% yield). Characterization data matched those reported in the literature.[[21](#_ENREF_25)]

**1H NMR** (500 MHz, Chloroform-*d*) δ 7.58 – 7.55 (m, 1H), 7.49 (dd, *J* = 7.7, 1.6 Hz, 1H), 7.26 – 7.21 (m, 1H), 7.18 – 7.13 (m, 1H), 0.28 (s, 9H).

**13C NMR** (126 MHz, Chloroform-*d*) δ 133.6, 132.4, 129.5, 126.9, 125.8, 125.3, 103.0, 99.6, -0.2.

**((4-iodophenyl)ethynyl)trimethylsilane (3at)**

Prepared according to general procedure F using ((4-iodophenyl)ethynyl)(methyl)sulfane (54.8 mg, 0.2 mmol), TMSCl (43.5 mg, 0.4 mmol), CoI2 (6.3 mg, 0.02 mmol), **L8** (7.0 mg, 0.03 mmol), Zn (26.2 mg, 0.4 mmol), DMF (2.0 mL) at room temperature for 4 h. The crude material was purified by flash chromatography on silica gel to provide the title compound **3at** as a white solid (35.0 mg, 58% yield). Characterization data matched those reported in the literature.[[22](#_ENREF_26)]

**1H NMR** (500 MHz, Chloroform-*d*) δ 7.63 (d, *J* = 8.4 Hz, 2H), 7.18 (d, *J* = 8.4 Hz, 2H), 0.24 (s, 9H).

**13C NMR** (126 MHz, Chloroform-*d*) δ 137.4, 133.4, 122.6, 104.0, 95.9, 94.4, -0.1.

**4-((trimethylsilyl)ethynyl)phenyl 4-methylbenzenesulfonate (3au)**

Prepared according to general procedure F using 4-((methylthio)ethynyl)phenyl 4-methylbenzenesulfonate (63.6 mg, 0.2 mmol), TMSCl (43.5 mg, 0.4 mmol), CoI2 (6.3 mg, 0.02 mmol), **L8** (7.0 mg, 0.03 mmol), Zn (26.2 mg, 0.4 mmol), DMF (2.0 mL) at room temperature for 4 h. The crude material was purified by flash chromatography on silica gel to provide the title compound **3au** as a white solid (56.0 mg, 81% yield)**.**

**1H NMR** (400 MHz, Chloroform-*d*) δ 7.66 (d, *J* = 8.3 Hz, 2H), 7.36 (d, *J* = 8.5 Hz, 2H), 7.28 (d, *J* = 8.3 Hz, 2H), 6.90 (d, *J* = 8.5 Hz, 2H), 2.42 (s, 3H), 0.22 (s, 9H).

**13C NMR** (101 MHz, Chloroform-*d*) δ 149.3, 145.5, 133.2, 131.9, 129.7, 128.5, 122.3, 122.1, 103.5, 95.5, 21.6, -0.2.

**Melting point**: 98-99 °C

**HRMS-ESI (m/z):** [M+H]+ Calcd for C18H21O3SSi 345.0975; Found: 345.0970.

**4-((trimethylsilyl)ethynyl)phenyl trifluoromethanesulfonate (3av)**

Prepared according to general procedure F using 4-((methylthio)ethynyl)phenyl trifluoromethanesulfonate (59.2 mg, 0.2 mmol), TMSCl (43.5 mg, 0.4 mmol), CoI2 (6.3 mg, 0.02 mmol), **L8** (7.0 mg, 0.03 mmol), Zn (26.2 mg, 0.4 mmol), DMF (2.0 mL) at room temperature for 4 h. The crude material was purified by flash chromatography on silica gel to provide the title compound **3av** as a yellow oil (50.0 mg, 78% yield). Characterization data matched those reported in the literature.[[23](#_ENREF_27)]

**1H NMR** (400 MHz, Chloroform-*d*) δ 7.56 – 7.50 (m, 2H), 7.23 – 7.19 (m, 2H), 0.25 (s, 9H).

**13C NMR** (101 MHz, Chloroform-*d*) δ 149.0, 133.8, 123.8, 121.3, 120.3, 102.8, 96.7, -0.2.

**2-((trimethylsilyl)ethynyl)phenyl trifluoromethanesulfonate (3aw)**

Prepared according to general procedure F using 2-((methylthio)ethynyl)phenyl trifluoromethanesulfonate (59.2 mg, 0.2 mmol), TMSCl (43.5 mg, 0.4 mmol), CoI2 (6.3 mg, 0.02 mmol), **L8** (7.0 mg, 0.03 mmol), Zn (26.2 mg, 0.4 mmol), DMF (2.0 mL) at room temperature for 4 h. The crude material was purified by flash chromatography on silica gel to provide the title compound **3aw** as a yellow oil (48.0 mg, 75% yield)**.**

**1H NMR** (500 MHz, Chloroform-*d*) δ 7.42 (d, *J* = 7.5 Hz, 1H), 7.26 – 7.21 (m, 1H), 7.17 (t, *J* = 7.5 Hz, 1H), 7.12 (d, *J* = 8.1 Hz, 1H), 0.12 (s, 9H).

**13C NMR** (126 MHz, Chloroform-*d*) δ 150.2, 134.1, 129.9, 128.0, 121.5, 120.0 (q, *J* = 321.1 Hz), 118.1, 102.8, 97.2, -0.5.

**19F NMR** (471 MHz, Chloroform-*d*) δ -73.60.

**HRMS-ESI (m/z):** [M+H]+ Calcd for C12H14F3O3SSi 323.0380; Found: 323.0374.

**4-bromo-2-((trimethylsilyl)ethynyl)phenyl trifluoromethanesulfonate (3ax)**

Prepared according to general procedure F using 4-bromo-2-((methylthio)ethynyl)phenyl trifluoromethanesulfonate (74.8 mg, 0.2 mmol), TMSCl (43.5 mg, 0.4 mmol), CoI2 (6.3 mg, 0.02 mmol), **L8** (7.0 mg, 0.03 mmol), Zn (26.2 mg, 0.4 mmol), DMF (2.0 mL) at room temperature for 4 h. The crude material was purified by flash chromatography on silica gel to provide the title compound **3ax** as a yellow oil (51.0 mg, 64% yield)**.**

**1H NMR** (500 MHz, Chloroform-*d*) δ 7.70 (d, *J* = 2.3 Hz, 1H), 7.49 (dd, *J* = 8.8, 2.3 Hz, 1H), 7.14 (d, *J* = 8.8 Hz, 1H), 0.26 (s, 9H).

**13C NMR** (126 MHz, Chloroform-*d*) δ 149.1, 136.6, 132.9, 123.0, 121.3, 120.0, 118.6 (q, *J* = 320.7 Hz), 104.6, 95.8, -0.6.

**19F NMR** (471 MHz, Chloroform-*d*) δ -73.44.

**HRMS-ESI (m/z):** [M+H]+ Calcd for C12H13BrF3O3SSi 398.9339; Found: 398.9336.

**((3-bromo-4-methoxyphenyl)ethynyl)trimethylsilane (3ay)**

Prepared according to general procedure F using ((3-bromo-4-methoxyphenyl)ethynyl)(methyl)sulfane (51.2 mg, 0.2 mmol), TMSCl (43.5 mg, 0.4 mmol), CoI2 (6.3 mg, 0.02 mmol), **L8** (7.0 mg, 0.03 mmol), Zn (26.2 mg, 0.4 mmol), DMF (2.0 mL) at room temperature for 4 h. The crude material was purified by flash chromatography on silica gel to provide the title compound **3ay** as a white solid (42.0 mg, 75% yield)**.**

**1H NMR** (500 MHz, Chloroform-*d*) δ 7.66 (d, *J* = 2.0 Hz, 1H), 7.38 (dd, *J* = 8.5, 2.0 Hz, 1H), 6.79 (d, *J* = 8.5 Hz, 1H), 3.88 (s, 3H), 0.24 (s, 9H).

**13C NMR** (126 MHz, Chloroform-*d*) δ 156.1, 136.7, 132.3, 116.7, 111.3, 111.2, 103.4, 93.8, 56.2, -0.1.

**Melting point**: 62-63 °C

**HRMS-ESI (m/z):** [M+H]+ Calcd for C12H16BrOSi 283.0148; Found: 283.0144.

**((5-bromo-2-chlorophenyl)ethynyl)trimethylsilane (3az)**

Prepared according to general procedure F using ((5-bromo-2-chlorophenyl)ethynyl)(methyl)sulfane (52.0 mg, 0.2 mmol), TMSCl (43.5 mg, 0.4 mmol), CoI2 (6.3 mg, 0.02 mmol), **L8** (7.0 mg, 0.03 mmol), Zn (26.2 mg, 0.4 mmol), DMF (2.0 mL) at room temperature for 4 h. The crude material was purified by flash chromatography on silica gel to provide the title compound **3az** as a yellow oil (39.0 mg, 68% yield)**.**

**1H NMR** (500 MHz, Chloroform-*d*) δ 7.63 (d, *J* = 2.4 Hz, 1H), 7.35 (dd, *J* = 8.6, 2.4 Hz, 1H), 7.24 (d, *J* = 8.6 Hz, 1H), 0.27 (s, 9H).

**13C NMR** (126 MHz, Chloroform-*d*) δ 136.0, 135.1, 132.4, 130.5, 124.9, 119.6, 102.0, 99.8, -0.3.

**HRMS-ESI (m/z):** [M+H]+ Calcd for C11H13BrClSi 286.9653; Found: 286.9651.

**((5-bromo-2-fluoro-4-methoxyphenyl)ethynyl)trimethylsilane (3ba)**

Prepared according to general procedure F using ((5-bromo-2-fluoro-4-methoxyphenyl)ethynyl)(methyl)sulfane (54.8 mg, 0.2 mmol), TMSCl (43.5 mg, 0.4 mmol), CoI2 (6.3 mg, 0.02 mmol), **L8** (7.0 mg, 0.03 mmol), Zn (26.2 mg, 0.4 mmol), DMF (2.0 mL) at room temperature for 4 h. The crude material was purified by flash chromatography on silica gel to provide the title compound **3ba** as a yellow oil (36.0 mg, 60% yield)**.**

**1H NMR** (500 MHz, Chloroform-*d*) δ 7.62 (d, *J* = 7.5 Hz, 1H), 6.62 (d, *J* = 10.7 Hz, 1H), 3.88 (s, 3H), 0.25 (s, 9H).

**13C NMR** (126 MHz, Chloroform-*d*) δ 163.1 (d, *J* = 252.7 Hz), 157.1 (d, *J* = 9.7 Hz), 136.98 (d, *J* = 2.7 Hz), 136.97, 105.60 (d, *J* = 3.6 Hz), 105.6, 105.1 (d, *J* = 17.2 Hz), 100.1 (d, *J* = 26.6 Hz), 99.6 (d, *J* = 3.2 Hz), 96.5, 56.6, -0.2.

**19F NMR** (471 MHz, Chloroform-*d*) δ -107.31 (dd, *J* = 10.7, 7.5 Hz).

**HRMS-ESI (m/z):** [M+H]+ Calcd for C12H14BrFOSi 301.0054; Found: 301.0050.

**((2-chloro-4,5-difluorophenyl)ethynyl)trimethylsilane (3bb)**

Prepared according to general procedure F using ((2-chloro-4,5-difluorophenyl)ethynyl)(methyl)sulfane (43.6 mg, 0.2 mmol), TMSCl (43.5 mg, 0.4 mmol), CoI2 (6.3 mg, 0.02 mmol), **L8** (7.0 mg, 0.03 mmol), Zn (26.2 mg, 0.4 mmol), DMF (2.0 mL) at room temperature for 4 h. The crude material was purified by flash chromatography on silica gel to provide the title compound **3bb** as a yellow oil (35.0 mg, 71% yield)**.**

**1H NMR** (400 MHz, Chloroform-*d*) δ 7.30 (dd, *J* = 10.3, 8.2 Hz, 1H), 7.22 (dd, *J* = 9.8, 7.3 Hz, 1H), 0.27 (s, 9H).

**13C NMR** (126 MHz, Chloroform-*d*) δ 151.4 – 149.4 (m), 149.2 – 147.0 (m), 132.1 – 131.4 (m), 121.5 (d, *J* = 19.8 Hz), 119.8 – 119.6 (m), 118.5 (d, *J* = 20.6 Hz), 101.3 (d, *J* = 1.8 Hz), 99.1, -0.3.

**19F NMR** (376 MHz, Chloroform-*d*) δ -132.53 (d, *J* = 21.4 Hz), -138.88 (d, *J* = 21.4 Hz).

**HRMS-ESI (m/z):** [M-H]+ Calcd for C11H10ClF2Si 243.0214; Found: 243.0224.

**((2,4-dichloro-5-fluorophenyl)ethynyl)trimethylsilane (3bc)**

Prepared according to general procedure F using ((2,4-dichloro-5-fluorophenyl)ethynyl)(methyl)sulfane (46.8 mg, 0.2 mmol), TMSCl (43.5 mg, 0.4 mmol), CoI2 (6.3 mg, 0.02 mmol), **L8** (7.0 mg, 0.03 mmol), Zn (26.2 mg, 0.4 mmol), DMF (2.0 mL) at room temperature for 4 h. The crude material was purified by flash chromatography on silica gel to provide the title compound **3bc** as a white solid (40.0 mg, 77% yield)**.**

**1H NMR** (500 MHz, Chloroform-*d*) δ 7.41 (d, *J* = 6.7 Hz, 1H), 7.24 (d, *J* = 9.0 Hz, 1H), 0.26 (s, 9H).

**13C NMR** (126 MHz, Chloroform-*d*) δ 156.2 (d, *J* = 249.7 Hz), 131.8, 130.7, 122.9 (d, *J* = 8.5 Hz), 122.1 (d, *J* = 19.2 Hz), 120.6 (d, *J* = 23.7 Hz), 102.6, 99.2 (d, *J* = 2.4 Hz), -0.3.

**19F NMR** (471 MHz, Chloroform-*d*) δ -117.48 – -117.55 (m).

**Melting point**: 37-38 °C

**HRMS-ESI (m/z):** [M+H]+ Calcd for C11H12Cl2FSi 258.9956; Found: 258.9951.

**((4-(3-chloropropoxy)phenyl)ethynyl)trimethylsilane (3bd)**

Prepared according to general procedure F using ((4-(3-chloropropoxy)phenyl)ethynyl)(methyl)sulfane (48.0 mg, 0.2 mmol), TMSCl (43.5 mg, 0.4 mmol), CoI2 (6.3 mg, 0.02 mmol), **L8** (7.0 mg, 0.03 mmol), Zn (26.2 mg, 0.4 mmol), DMF (2.0 mL) at room temperature for 4 h. The crude material was purified by flash chromatography on silica gel to provide the title compound **3bd** as a white solid (36.0 mg, 72% yield)**.**

**1H NMR** (500 MHz, Chloroform-*d*) δ 7.42 – 7.38 (m, 2H), 6.83 – 6.79 (m, 2H), 4.10 (t, *J* = 5.9 Hz, 2H), 3.73 (t, *J* = 6.3 Hz, 2H), 2.26 – 2.19 (m, 2H), 0.24 (s, 9H).

**13C NMR** (126 MHz, Chloroform-*d*) δ 158.8, 133.5, 115.5, 114.3, 105.1, 92.5, 64.3, 41.4, 32.2, 0.0.

**Melting point**: 37-38 °C

**HRMS-ESI (m/z):** [M+H]+ Calcd for C14H20ClOSi 267.0966; Found: 267.0962.

**trimethyl((4-(4,4,5,5-tetramethyl-1,3,2-dioxaborolan-2-yl)phenyl)ethynyl)silane (3be)**

Prepared according to general procedure F using 4,4,5,5-tetramethyl-2-(4-((methylthio)ethynyl)phenyl)-1,3,2-dioxaborolane (54.8 mg, 0.2 mmol), TMSCl (43.5 mg, 0.4 mmol), CoI2 (6.3 mg, 0.02 mmol), **L8** (7.0 mg, 0.03 mmol), Zn (26.2 mg, 0.4 mmol), DMF (2.0 mL) at room temperature for 4 h. The crude material was purified by flash chromatography on silica gel to provide the title compound **3be** as a white solid (51.0 mg, 85% yield). Characterization data matched those reported in the literature.[[4](#_ENREF_8)]

**1H NMR** (500 MHz, Chloroform-d) δ 7.73 (d, J = 8.1 Hz, 2H), 7.45 (d, J = 8.2 Hz, 2H), 1.34 (s, 12H), 0.25 (s, 9H).

**13C NMR** (126 MHz, Chloroform-*d*) δ 134.4, 131.1, 125.8, 105.2, 95.5, 83.9, 24.9, -0.1.

**ethyl((4-methoxyphenyl)ethynyl)dimethylsilane (4a)**

Prepared according to general procedure F using ((4-methoxyphenyl)ethynyl)(methyl)sulfane **1a** (35.6 mg, 0.2 mmol), chloro(ethyl)dimethylsilane (48.8 mg, 0.4 mmol), CoI2 (6.3 mg, 0.02 mmol), **L8** (7.0 mg, 0.03 mmol), Zn (26.2 mg, 0.4 mmol), DMF (2.0 mL) at room temperature for 4 h. The crude material was purified by flash chromatography on silica gel to provide the title compound **4a** as a yellow oil (42.0 mg, 96% yield)**.**

**1H NMR** (500 MHz, Chloroform-*d*) δ 7.41 (d, *J* = 8.9 Hz, 2H), 6.82 (d, *J* = 8.8 Hz, 2H), 3.80 (s, 3H), 1.05 (t, *J* = 7.9 Hz, 3H), 0.67 (q, *J* = 7.9 Hz, 2H), 0.21 (s, 6H).

**13C NMR** (126 MHz, Chloroform-*d*) δ 159.7, 133.5, 115.3, 113.8, 105.6, 91.5, 55.2, 8.2, 7.3, -2.2.

**HRMS-ESI (m/z):** [M+H]+ Calcd for C13H19OSi 219.1200; Found: 219.1197.

**butyl((4-methoxyphenyl)ethynyl)dimethylsilane (4b)**

Prepared according to general procedure F using ((4-methoxyphenyl)ethynyl)(methyl)sulfane **1a** (35.6 mg, 0.2 mmol), butylchlorodimethylsilane (60.0 mg, 0.4 mmol), CoI2 (6.3 mg, 0.02 mmol), **L8** (7.0 mg, 0.03 mmol), Zn (26.2 mg, 0.4 mmol), DMF (2.0 mL) at room temperature for 4 h. The crude material was purified by flash chromatography on silica gel to provide the title compound **4b** as a yellow oil (41.0 mg, 83% yield)**.**

**1H NMR** (500 MHz, Chloroform-*d*) δ 7.41 (d, *J* = 8.8 Hz, 2H), 6.82 (d, *J* = 8.8 Hz, 2H), 3.80 (s, 3H), 1.46 – 1.37 (m, 4H), 0.92 (t, *J* = 7.0 Hz, 3H), 0.74 – 0.65 (m, 2H), 0.22 (s, 6H).

**13C NMR** (126 MHz, Chloroform-*d*) δ 159.7, 133.5, 115.4, 113.8, 105.5, 91.8, 55.2, 26.2, 26.1, 16.0, 13.8, -1.6.

**HRMS-ESI (m/z):** [M+H]+ Calcd for C15H23OSi 247.1513; Found: 247.1513.

**((4-methoxyphenyl)ethynyl)dimethyl(3-phenylpropyl)silane (4c)**

Prepared according to general procedure F using ((4-methoxyphenyl)ethynyl)(methyl)sulfane **1a** (35.6 mg, 0.2 mmol), chlorodimethyl(3-phenylpropyl)silane (84.8 mg, 0.4 mmol), CoI2 (6.3 mg, 0.02 mmol), **L8** (7.0 mg, 0.03 mmol), Zn (26.2 mg, 0.4 mmol), DMF (2.0 mL) at room temperature for 4 h. The crude material was purified by flash chromatography on silica gel to provide the title compound **4c** as a yellow oil (59.0 mg, 96% yield)**.**

**1H NMR** (500 MHz, Chloroform-*d*) δ 7.30 (d, *J* = 8.7 Hz, 2H), 7.19 (t, *J* = 7.5 Hz, 2H), 7.14 – 7.07 (m, 3H), 6.72 (d, *J* = 8.8 Hz, 2H), 3.69 (s, 3H), 2.60 (t, *J* = 7.6 Hz, 2H), 1.73 – 1.65 (m, 2H), 0.67 – 0.61 (m, 2H), 0.12 (s, 6H).

**13C NMR** (126 MHz, Chloroform-*d*) δ 159.7, 142.6, 133.5, 128.5, 128.2, 125.6, 115.3, 113.8, 105.8, 91.6, 55.2, 39.4, 25.9, 16.0, -1.6.

**HRMS-ESI (m/z):** [M+H]+ Calcd for C20H25OSi 308.1596; Found: 308.1586.

**4-(((4-methoxyphenyl)ethynyl)dimethylsilyl)butanenitrile (4d)**

Prepared according to general procedure F using ((4-methoxyphenyl)ethynyl)(methyl)sulfane **1a** (35.6 mg, 0.2 mmol), 4-(chlorodimethylsilyl)butanenitrile (64.4 mg, 0.4 mmol), CoI2 (6.3 mg, 0.02 mmol), **L8** (7.0 mg, 0.03 mmol), Zn (26.2 mg, 0.4 mmol), DMF (2.0 mL) at room temperature for 4 h. The crude material was purified by flash chromatography on silica gel to provide the title compound **4d** as a yellow oil (47.0 mg, 91% yield)**.**

**1H NMR** (500 MHz, Chloroform-*d*) δ 7.39 (d, *J* = 8.8 Hz, 2H), 6.82 (d, *J* = 8.7 Hz, 2H), 3.80 (s, 3H), 2.42 (t, *J* = 7.0 Hz, 2H), 1.86 – 1.79 (m, 2H), 0.86 – 0.80 (m, 2H), 0.24 (s, 6H).

**13C NMR** (126 MHz, Chloroform-*d*) δ 159.9, 133.5, 119.7, 114.8, 113.8, 106.6, 90.3, 55.2, 20.6, 20.4, 15.8, -1.8.

**HRMS-ESI (m/z):** [M+H]+ Calcd for C15H20NOSi 258.1309; Found: 258.1305.

**((4-methoxyphenyl)ethynyl)dimethyl(phenyl)silane (4e)**

Prepared according to general procedure F using ((4-methoxyphenyl)ethynyl)(methyl)sulfane **1a** (35.6 mg, 0.2 mmol), chlorodimethyl(phenyl)silane (68.0 mg, 0.4 mmol), CoI2 (6.3 mg, 0.02 mmol), **L8** (7.0 mg, 0.03 mmol), Zn (26.2 mg, 0.4 mmol), DMF (2.0 mL) at room temperature for 4 h. The crude material was purified by flash chromatography on silica gel to provide the title compound **4e** as a yellow oil (45.0 mg, 85% yield). Characterization data matched those reported in the literature.[[12](#_ENREF_16)]

**1H NMR** (500 MHz, Chloroform-*d*) δ 7.63 – 7.58 (m, 2H), 7.35 (d, *J* = 8.8 Hz, 2H), 7.32 – 7.27 (m, 3H), 6.73 (d, *J* = 8.8 Hz, 2H), 3.69 (s, 3H), 0.39 (s, 6H).

**13C NMR** (126 MHz, Chloroform-*d*) δ 159.9, 137.3, 133.7, 133.6, 129.3, 127.9, 115.1, 113.8, 106.9, 90.3, 55.2, -0.7.

**((4-methoxyphenyl)ethynyl)(methyl)diphenylsilane (4f)**

Prepared according to general procedure F using ((4-methoxyphenyl)ethynyl)(methyl)sulfane **1a** (35.6 mg, 0.2 mmol), chloro(methyl)diphenylsilane (92.8 mg, 0.4 mmol), CoI2 (6.3 mg, 0.02 mmol), **L8** (7.0 mg, 0.03 mmol), Zn (26.2 mg, 0.4 mmol), DMF (2.0 mL) at room temperature for 4 h. The crude material was purified by flash chromatography on silica gel to provide the title compound **4f** as a yellow oil (44.0 mg, 67% yield). Characterization data matched those reported in the literature.[[24](#_ENREF_28)]

**1H NMR** (500 MHz, Chloroform-*d*) δ 7.70 (d, *J* = 6.9 Hz, 4H), 7.48 (d, *J* = 8.5 Hz, 2H), 7.38 (q, *J* = 5.5, 5.0 Hz, 6H), 6.84 (d, *J* = 8.3 Hz, 2H), 3.80 (s, 3H), 0.75 (s, 3H).

**13C NMR** (126 MHz, Chloroform-*d*) δ 160.1, 135.6, 134.6, 133.7, 129.6, 127.9, 114.9, 113.9, 108.5, 88.6, 55.3, -1.9.

**isopropyl((4-methoxyphenyl)ethynyl)dimethylsilane (4g)**

Prepared according to general procedure F using ((4-methoxyphenyl)ethynyl)(methyl)sulfane **1a** (35.6 mg, 0.2 mmol), chloro(isopropyl)dimethylsilane (54.4 mg, 0.4 mmol), CoI2 (6.3 mg, 0.02 mmol), **L8** (7.0 mg, 0.03 mmol), Zn (26.2 mg, 0.4 mmol), DMF (2.0 mL) at room temperature for 4 h. The crude material was purified by flash chromatography on silica gel to provide the title compound **4g** as a yellow oil (28.0 mg, 61% yield)**.**

**1H NMR** (500 MHz, Chloroform-*d*) δ 7.41 (d, *J* = 8.8 Hz, 2H), 6.82 (d, *J* = 8.8 Hz, 2H), 3.80 (s, 3H), 1.05 (d, *J* = 7.3 Hz, 6H), 0.92 – 0.86 (m, 1H), 0.18 (s, 6H).

**13C NMR** (126 MHz, Chloroform-*d*) δ 159.7, 133.5, 115.4, 113.8, 105.8, 90.9, 55.3, 17.4, 14.1, -3.7.

**HRMS-ESI (m/z):** [M+H]+ Calcd for C14H21OSi 233.1356; Found: 233.1355.

**cyclohexyl((4-methoxyphenyl)ethynyl)dimethylsilane (4h)**

Prepared according to general procedure F using ((4-methoxyphenyl)ethynyl)(methyl)sulfane **1a** (35.6 mg, 0.2 mmol), chloro(cyclohexyl)dimethylsilane (70.4 mg, 0.4 mmol), CoI2 (6.3 mg, 0.02 mmol), **L8** (7.0 mg, 0.03 mmol), Zn (26.2 mg, 0.4 mmol), DMF (2.0 mL) at room temperature for 4 h. The crude material was purified by flash chromatography on silica gel to provide the title compound **4h** as a yellow oil (29.0 mg, 54% yield)**.**

**1H NMR** (500 MHz, Chloroform-*d*) δ 7.41 (d, *J* = 8.8 Hz, 2H), 6.82 (d, *J* = 8.8 Hz, 2H), 3.80 (s, 3H), 1.83 – 1.75 (m, 4H), 1.30 – 1.15 (m, 6H), 0.77 – 0.70 (m, 1H), 0.16 (s, 6H).

**13C NMR** (126 MHz, Chloroform-*d*) δ 159.7, 133.5, 115.4, 113.8, 105.8, 91.1, 55.3, 27.9, 27.3, 26.9, 25.8, -3.6.

**HRMS-ESI (m/z):** [M+H]+ Calcd for C17H25OSi 273.1669; Found: 273.1664.

**1-((4-methoxyphenyl)ethynyl)-1,1,2,2,2-pentamethyldisilane (4i)**

Prepared according to general procedure F using ((4-methoxyphenyl)ethynyl)(methyl)sulfane **1a** (35.6 mg, 0.2 mmol), 1-chloro-1,1,2,2,2-pentamethyldisilane (66.4 mg, 0.4 mmol), CoI2 (6.3 mg, 0.02 mmol), **L8** (7.0 mg, 0.03 mmol), Zn (26.2 mg, 0.4 mmol), DMF (2.0 mL) at room temperature for 4 h. The crude material was purified by flash chromatography on silica gel to provide the title compound **4i** as a white solid (49.0 mg, 94% yield)**.**

**1H NMR** (500 MHz, Chloroform-*d*) δ 7.23 (d, *J* = 8.9 Hz, 2H), 6.65 (d, *J* = 8.8 Hz, 2H), 3.63 (s, 3H), 0.10 (s, 6H), -0.00 (s, 9H).

**13C NMR** (126 MHz, Chloroform-*d*) δ 159.6, 133.4, 115.7, 113.8, 107.3, 91.3, 55.2, -2.5, -2.9.

**Melting point**: 30-31 °C

**HRMS-ESI (m/z):** [M+H]+ Calcd for C14H23OSi2 263.1282; Found: 263.1288.

**allyl((4-methoxyphenyl)ethynyl)dimethylsilane (4j)**

Prepared according to general procedure F using ((4-methoxyphenyl)ethynyl)(methyl)sulfane **1a** (35.6 mg, 0.2 mmol), allylchlorodimethylsilane (53.6 mg, 0.4 mmol), CoI2 (6.3 mg, 0.02 mmol), **L8** (7.0 mg, 0.03 mmol), Zn (26.2 mg, 0.4 mmol), DMF (2.0 mL) at room temperature for 4 h. The crude material was purified by flash chromatography on silica gel to provide the title compound **4j** as a yellow oil (40.0 mg, 87% yield)**.**

**1H NMR** (500 MHz, Chloroform-*d*) δ 7.41 (d, *J* = 8.7 Hz, 2H), 6.82 (d, *J* = 8.7 Hz, 2H), 5.93 – 5.82 (m, 1H), 4.98 – 4.90 (m, 2H), 3.80 (s, 3H), 1.71 (d, *J* = 8.0 Hz, 2H), 0.23 (s, 6H).

**13C NMR** (126 MHz, Chloroform-*d*) δ 159.8, 134.1, 133.5, 115.1, 113.8, 113.8, 106.1, 90.9, 55.2, 24.1, -2.2.

**HRMS-ESI (m/z):** [M+H]+ Calcd for C14H19OSi 231.1200; Found: 231.1198.

**((4-methoxyphenyl)ethynyl)dimethyl(vinyl)silane (4k)**

Prepared according to general procedure F using ((4-methoxyphenyl)ethynyl)(methyl)sulfane **1a** (35.6 mg, 0.2 mmol), chlorodimethyl(vinyl)silane (48.0 mg, 0.4 mmol), CoI2 (6.3 mg, 0.02 mmol), **L8** (7.0 mg, 0.03 mmol), Zn (26.2 mg, 0.4 mmol), DMF (2.0 mL) at room temperature for 4 h. The crude material was purified by flash chromatography on silica gel to provide the title compound **4k** as a yellow oil (41.0 mg, 95% yield)**.**

**1H NMR** (500 MHz, Chloroform-*d*) δ 7.21 (d, *J* = 8.9 Hz, 2H), 6.61 (d, *J* = 8.9 Hz, 2H), 6.07 – 5.95 (m, 1H), 5.87 – 5.81 (m, 1H), 5.74 – 5.66 (m, 1H), 3.59 (s, 3H), 0.10 (s, 6H).

**13C NMR** (126 MHz, Chloroform-*d*) δ 159.8, 136.8, 133.5, 132.9, 115.1, 113.8, 106.3, 90.3, 55.2, -1.4.

**HRMS-ESI (m/z):** [M+H]+ Calcd for C13H17OSi 217.1043; Found: 217.1042.

**((4-methoxyphenyl)ethynyl)(methyl)(phenyl)(vinyl)silane (4l)**

Prepared according to general procedure F using ((4-methoxyphenyl)ethynyl)(methyl)sulfane **1a** (35.6 mg, 0.2 mmol), chloro(methyl)(phenyl)(vinyl)silane (72.8 mg, 0.4 mmol), CoI2 (6.3 mg, 0.02 mmol), **L8** (7.0 mg, 0.03 mmol), Zn (26.2 mg, 0.4 mmol), DMF (2.0 mL) at room temperature for 4 h. The crude material was purified by flash chromatography on silica gel to provide the title compound **4l** as a yellow oil (46.0 mg, 83% yield)**.**

**1H NMR** (500 MHz, Chloroform-*d*) δ 7.77 – 7.70 (m, 2H), 7.50 (d, *J* = 8.8 Hz, 2H), 7.45 – 7.39 (m, 3H), 6.86 (d, *J* = 8.9 Hz, 2H), 6.40 – 6.30 (m, 1H), 6.23 – 6.15 (m, 1H), 6.07 – 5.98 (m, 1H), 3.83 (s, 3H), 0.60 (s, 3H).

**13C NMR** (126 MHz, Chloroform-*d*) δ 160.0, 135.4, 135.0, 134.6, 134.2, 133.6, 129.5, 127.9, 114.9, 113.9, 108.0, 88.3, 55.2, -2.5.

**HRMS-ESI (m/z):** [M+H]+ Calcd for C18H19OSi 279.1199; Found: 279.1208.

**triethyl((4-methoxyphenyl)ethynyl)silane (4m)**

Prepared according to general procedure F using ((4-methoxyphenyl)ethynyl)(methyl)sulfane **1a** (35.6 mg, 0.2 mmol), chlorotriethylsilane (60.0 mg, 0.4 mmol), CoI2 (6.3 mg, 0.02 mmol), **L8** (7.0 mg, 0.03 mmol), Zn (26.2 mg, 0.4 mmol), DMF (2.0 mL) at room temperature for 4 h. The crude material was purified by flash chromatography on silica gel to provide the title compound **4m** as a colorless oil (35.0 mg, 71% yield). Characterization data matched those reported in the literature.[[25](#_ENREF_29)]

**1H NMR** (500 MHz, Chloroform-*d*) δ 7.33 (d, *J* = 8.8 Hz, 2H), 6.74 (d, *J* = 8.7 Hz, 2H), 3.72 (s, 3H), 0.97 (t, *J* = 7.9 Hz, 9H), 0.59 (q, *J* = 7.9 Hz, 6H).

**13C NMR** (126 MHz, Chloroform-*d*) δ 159.7, 133.5, 115.6, 113.8, 106.4, 89.8, 55.3, 7.5, 4.5.

**tributyl((4-methoxyphenyl)ethynyl)silane (4n)**

Prepared according to general procedure F using ((4-methoxyphenyl)ethynyl)(methyl)sulfane **1a** (35.6 mg, 0.2 mmol), tributylchlorosilane (93.6 mg, 0.4 mmol), CoI2 (6.3 mg, 0.02 mmol), **L8** (7.0 mg, 0.03 mmol), Zn (26.2 mg, 0.4 mmol), DMF (2.0 mL) at room temperature for 4 h. The crude material was purified by flash chromatography on silica gel to provide the title compound **4n** as a yellow oil (45.0 mg, 69% yield)**.**

**1H NMR** (500 MHz, Chloroform-*d*) δ 7.22 (d, *J* = 8.7 Hz, 2H), 6.64 (d, *J* = 8.7 Hz, 2H), 3.63 (s, 3H), 1.26 – 1.17 (m, 12H), 0.74 (t, *J* = 6.9 Hz, 9H), 0.52 – 0.46 (m, 6H).

**13C NMR** (126 MHz, Chloroform-*d*) δ 159.6, 133.5, 115.7, 113.8, 106.3, 90.7, 55.3, 26.5, 26.2, 13.8, 13.2.

**HRMS-ESI (m/z):** [M+H]+ Calcd for C21H35OSi 331.2452; Found: 331.2447.

**4.3. Gram-Scale Experiment**

Prepared according to general procedure F using ((3-bromo-4-methoxyphenyl)ethynyl)(methyl)sulfane (1.54 g, 6 mmol), TMSCl (1.3 g, 12 mmol), CoI2 (94.0 mg, 0.3 mmol), **L8** (105.0 mg, 0.45 mmol), Zn (0.79 g, 12 mmol), DMF (40.0 mL) at room temperature for 8 h. The crude material was purified by flash chromatography on silica gel to provide the title compound **3ay** as a white solid (1.2 g, 71% yield)**.**

**4.4. Product Derivatizations**

According to a literature procedure[[26](#_ENREF_30)], to a solution of TBAF (10 mol % in dry THF) was added alkynylsilane **3ay** (0.25 mmol) at room temperature. To this was added 1-(4-bromophenyl)-2,2,2-trifluoroethan-1-one (0.2 mmol) and then the reaction mixture was stirred at room temperature for 12 min. This was followed by the addition of 1 M aqueous HCl (1.0 mL) and further stirring for 15 min at room temperature. The reaction mixture was neutralized with aqueous NaHCO3 and then it was extracted with ethyl acetate. The organic layers were collected and dried with anhydrous Na2SO4 followed by solvent removal under reduced pressure. The crude product was purified by flash chromatography on silica gel to give CF3-substituted tertiary propargyl alcohols **5a** in 64% yield (59 mg) as a yellow oil.

**1H NMR** (400 MHz, Chloroform-*d*) δ 7.72 – 7.63 (m, 3H), 7.58 – 7.53 (m, 2H), 7.43 (dd, *J* = 8.5, 2.0 Hz, 1H), 6.86 (d, *J* = 8.5 Hz, 1H), 3.92 (s, 3H), 3.34 (s, 1H).

**13C NMR** (126 MHz, Chloroform-*d*) δ 157.1, 136.7, 134.3, 132.6, 131.4, 128.9, 124.0, 121.9 (q, *J* = 286.4 Hz), 114.0, 111.59, 111.55, 86.9, 83.6, 73.0 (q, *J* = 32.7 Hz), 56.4.

**HRMS-ESI (m/z):** [M+H]+ Calcd for C17H12Br2F3O2 462.9151; Found: 462.9149.

According to a literature procedure[[27](#_ENREF_31)], to a CH3CN solution (1 mL) in a screw-cap vial under N2 atmosphere, alkynylsilane **3ay** (0.25 mmol), o-hydroxybenzaldehyde (0.3 mmol), secondary amine (0.20 mmol), DMAP (0.2 mmol), Cu(OTf)2 (5 mol%), and CuCl (5 mol%) were successively added, and the vial was then sealed with a cap containing a PTFE septum. The reaction mixture was heated at 100 oC for 6 h. After completion of the reaction, the mixture was directly subjected to silica gel without the usual extraction, and was purified by flash column chromatography to give the corresponding 3-aminobenzofuran **5b** in 76% yield (61 mg) as a yellow oil.

**1H NMR** (400 MHz, Chloroform-*d*) δ 7.72 – 7.64 (m, 2H), 7.48 (d, *J* = 1.7 Hz, 1H), 7.39 (d, *J* = 7.8 Hz, 1H), 7.25 – 7.14 (m, 5H), 6.82 (d, *J* = 8.4 Hz, 1H), 4.09 (s, 2H), 3.88 – 3.85 (m, 9H), 3.18 (t, 5H).

**13C NMR** (101 MHz, Chloroform-*d*) δ 154.5, 153.4, 149.8, 133.3, 131.7, 128.7, 128.4, 125.9, 123.5, 122.1, 119.9, 111.9, 111.7, 111.6, 67.6, 56.2, 52.5, 31.0.

**HRMS-ESI (m/z):** [M+H]+ Calcd for C20H21BrNO3 402.0699; Found: 402.0695.

According to a literature procedure[[28](#_ENREF_32)], to a MeCN solution (1 mL) in a screw-capped vial under an N2 atmosphere, alkynylsilane **3ay** (0.24 mmol), aldehyde (0.20 mmol), amine (0.24 mmol), Cu(OTf)2 (5 mol%) and CuCl (5 mol%) were successively added, and the vial was sealed with a cap containing a PTFE septum. The reaction mixture was heated at 100 °C until the reaction was completed as monitored by TLC. After the reaction, the mixture was directly subjected to SiO2 gel without the usual extraction, and was purified by flash column chromatography (hexane–EtOAc) to give the corresponding propargyl amines **5c** in 84% yield (70mg) as a yellow oil.

**1H NMR** (400 MHz, Chloroform-*d*) δ 7.70 (d, *J* = 2.0 Hz, 1H), 7.51 (d, *J* = 8.6 Hz, 2H), 7.44 – 7.39 (m, 1H), 6.94 – 6.87 (m, 2H), 6.83 (d, *J* = 8.5 Hz, 1H), 4.70 (s, 1H), 3.90 (s, 3H), 3.81 (s, 3H), 3.77 – 3.67 (m, 4H), 2.66 – 2.53 (m, 4H).

**13C NMR** (101 MHz, Chloroform-*d*) δ 159.2, 155.9, 136.4, 132.1, 129.7, 129.6, 116.5, 113.5, 111.4, 111.3, 86.5, 85.0, 67.1, 61.4, 56.2, 55.2, 49.8.

**HRMS-ESI (m/z):** [M+H]+ Calcd for C21H23BrNO3 416.0856; Found: 416.0847.

According to the modified literature procedure[[29](#_ENREF_33)], a 10 mL sealed tube equipped with a magnetic stirring bar was charged with ZnCl2 (10 mol%), alkynylsilane **3ay** (0.20 mmol, 1.0 equiv), 2-pyrone (0.40 mmol, 2.0 equiv) and DCE (1.0 mL). The reaction mixture was stirred at 140 C for 12 h. The mixture was then filtered through silica gel pad. The filtrate was concentrated, and the residue was purified by column chromatography on silica gel to yield the desired product **5d** as a yellow oil in 73% yield (57 mg).

**1H NMR** (400 MHz, Chloroform-*d*) δ 7.78 – 7.70 (m, 2H), 7.43 – 7.37 (m, 2H), 7.14 – 7.09 (m, 1H), 6.89 (d, *J* = 8.4 Hz, 1H), 3.94 (s, 3H), 3.59 (s, 3H), -0.01 (s, 9H).

**13C NMR** (101 MHz, Chloroform-*d*) δ 168.8, 155.0, 146.1, 141.2, 137.4, 135.4, 134.4, 131.7, 129.6, 129.6, 126.7, 110.4, 110.3, 56.1, 51.9, 0.5.

According to a literature procedure[[30](#_ENREF_34)], a 10 mL sealed tube equipped with a magnetic stirring bar was charged with AuCl3 (3 mol%), alkynylsilane **3ay** (0.20 mmol, 1.0 equiv), *o*-alkynylbenzaldehyde (0.40 mmol, 2.0 equiv) and DCE (1.0 mL). The reaction mixture was stirred at 80 C for 12 h. The mixture was then filtered through silica gel pad. The filtrate was concentrated, and the residue was purified by column chromatography on silica gel to yield the desired product **5e** as a yellow oil in 49% yield (48 mg).

**1H NMR** (400 MHz, Chloroform-*d*) δ 8.20 (s, 1H), 7.95 (d, *J* = 8.1 Hz, 1H), 7.72 – 7.38 (m, 7H), 7.29 (t, *J* = 7.7 Hz, 2H), 7.22 – 7.05 (m, 1H), 6.87 – 6.59 (m, 1H), 3.83 (s, 3H), 0.08 (s, 9H).

**13C NMR** (101 MHz, Chloroform-*d*) δ 199.9, 155.0, 140.1, 138.2, 137.9, 136.9, 136.7, 135.5, 133.9, 133.2, 131.6, 130.3, 129.3, 128.8, 128.3, 128.3, 127.7, 126.4, 125.2, 110.5, 110.0, 56.1, 0.6.

According to a literature procedure[[31](#_ENREF_35)], in an argon-filled glove box, a 4-mL vial equipped with a magnetic stirrer bar was charged sequentially with CoBr2 (10 mol%), dcype (10 mol%), zinc powder (1 equiv), salicylaldehyde (0.60 mmol), and alkynylsilane **3ay** (0.20 mmol), followed by the addition of DMSO (0.5 mL). The vial was closed and removed from the glove box, and the mixture was stirred at 80 °C for 24 h. Upon cooling to room temperature, the reaction mixture was diluted with ethyl acetate (3 mL) and filtered through a pad of silica gel with additional ethyl acetate (10 mL) as an eluent. The organic solution was concentrated under reduced pressure, and the residue was purified by flash chromatography on silica gel to afford the desired product **5f** in 69% yield (45 mg) as a white solid.

**1H NMR** (400 MHz, Chloroform-*d*) δ 8.16 (dd, *J* = 7.9, 1.5 Hz, 1H), 7.65 – 7.59 (m, 1H), 7.49 – 7.44 (m, 2H), 7.39 – 7.34 (m, 2H), 7.01 – 6.96 (m, 2H), 3.88 (s, 3H), 0.06 (s, 9H).

**13C NMR** (101 MHz, Chloroform-*d*) δ 182.5, 169.1, 161.3, 156.2, 133.4, 130.8, 128.2, 125.6, 124.8, 122.8, 118.0, 117.6, 113.5, 55.4, -0.6.

Spectroscopic data for **5f** match those previously reported in the literature.[[31](#_ENREF_35)]

According to a literature procedure[[32](#_ENREF_36)], a 5 mL sealed tube equipped with a magnetic stirring bar was charged with Co(acac)2 (10 mol%), DPPE (10 mol%), *ortho*-formylphenylboronic acid (0.30 mmol), alkynylsilane **3ay** (0.20 mmol, 1.0 equiv), and MeCN (1 mL). The reaction mixture was stirred at 80 C for 12 h. The mixture was then filtered through silica gel pad. The filtrate was concentrated, and the residue was purified by column chromatography on silica gel to yield the desired product **5g** as a yellow oil in 81% yield (63 mg).

**1H NMR** (400 MHz, Chloroform-*d*) δ 7.59 – 7.52 (m, 2H), 7.45 (d, *J* = 7.5 Hz, 1H), 7.37 – 7.31 (m, 1H), 7.29 – 7.22 (m, 2H), 6.95 (d, *J* = 8.4 Hz, 1H), 5.31 (s, 1H), 3.96 (s, 3H), 0.19 (s, 9H).

**13C NMR** (101 MHz, Chloroform-*d*) δ 159.2, 155.6, 146.2, 144.6, 139.5, 134.0, 130.8, 129.4, 128.5, 125.5, 123.6, 122.7, 111.2, 111.2, 80.4, 56.2, 0.3.

**HRMS-ESI (m/z):** [M-H]+ Calcd for C19H20BrO2Si 387.0421; Found: 387.0412.

According to a literature procedure[[33](#_ENREF_37)], a 5 mL sealed tube equipped with a magnetic stirring bar was charged with Co(acac)2 (10 mol%), DPPE (10 mol%), alkynylsilane **3ay** (0.20 mmol, 1.0 equiv), *o*-methoxyphenylboronic acid (0.30 mmol, 1.5 equiv), and MeCN (1.0 mL). The reaction mixture was stirred at 80 C for 12 h. The mixture was then filtered through silica gel pad. The filtrate was concentrated, and the residue was purified by column chromatography on silica gel to yield the desired product **5h** as a yellow oil in 65% yield (50 mg).

**1H NMR** (400 MHz, Chloroform-*d*) δ 7.50 (d, *J* = 7.1 Hz, 1H), 7.46 (d, *J* = 2.1 Hz, 1H), 7.44 – 7.37 (m, 1H), 7.28 – 7.19 (m, 3H), 6.95 (d, *J* = 8.4 Hz, 1H), 3.95 (s, 3H), 0.23 (s, 9H).

**13C NMR** (101 MHz, Chloroform-*d*) δ 197.5, 156.9, 155.9, 148.5, 145.9, 134.6, 134.1, 130.0, 129.8, 128.1, 126.8, 123.2, 123.2, 111.2, 111.0, 56.2, 0.2.

**HRMS-ESI (m/z):** [M+H]+ Calcd for C19H20BrO2Si 387.0410; Found: 387.0404.

**5. Mechanistic studies**

**5.1. Radical trapping experiments**

**General Procedure**. The procedure was conducted in an argon-filled glove box. To a reaction tube equipped with a magnetic stir bar was added CoI2 (3.2 mg, 0.01 mmol), **L8** (3.5 mg, 0.015 mmol), and Zn (13 mg, 0.2 mmol). A solution of alkynyl sulfide **1a** (17.8 mg, 0.1 mmol), chlorosilane **2e** (34.0 mg, 0.2 mmol), and alkene **6** (0.3 mmol, 3 equiv) in DMF (1.0 mL) was added. The reaction tube was sealed and removed from the glove box. After stirring at room temperature for 4 h, the reaction mixture was diluted with ethyl acetate (5 mL) and washed with water. A 0.2 mL of solution was collected, diluted with ethyl acetate (1 mL), and used for GC analysis.

**5.2. Radical clock experiment**

**General Procedure.** The procedure was conducted in an argon-filled glove box. To a reaction tube equipped with a magnetic stir bar was added CoI2 (6.3 mg, 0.02 mmol), **L8** (7.0 mg, 0.03 mmol), and Zn (26.2 mg, 0.4 mmol). A solution of alkynyl sulfide **1a** (35.6 mg, 0.2 mmol) and chlorosilane **2o** (88.0 mg, 0.4 mmol) in DMF (2.0 mL) was added. The reaction tube was sealed and removed from the glove box. After stirring at room temperature for 4 h, the reaction was quenched with water (20 mL) and the mixture solution was extracted with ethyl acetate (3 × 15 mL). The combined organic layers were washed with water, brine, dried over anhydrous Na2SO4. A 0.4 mL of solution was collected, diluted with ethyl acetate (1 mL), and used for GC analysis. The rest was concentrated in vacuum, and the residue was purified by flash chromatography on silica gel to afford product **4o** (55.0 mg, 87% yield) as a yellow oil.

**3-(((4-methoxyphenyl)ethynyl)dimethylsilyl)propyl methacrylate (4o)**

**1H NMR** (400 MHz, Chloroform-*d*) δ 7.46 – 7.34 (m, 2H), 6.88 – 6.77 (m, 2H), 6.11 (s, 1H), 5.58 – 5.51 (m, 1H), 4.16 (t, *J* = 6.9 Hz, 2H), 3.80 (s, 3H), 1.95 (s, 3H), 1.87 – 1.76 (m, 2H), 0.78 – 0.67 (m, 2H), 0.23 (s, 6H).

**13C NMR** (126 MHz, Chloroform-*d*) δ 167.5, 159.8, 136.5, 133.5, 125.1, 115.1, 113.8, 106.1, 90.9, 66.9, 55.2, 23.3, 18.3, 12.3, -1.7.

**HRMS-ESI (m/z):** [M+H]+ Calcd for C18H25O3Si 317.1567; Found: 317.1566.

**5.3. Control experiments**

**General Procedure 5.3. (a).** The procedure was conducted in an argon-filled glove box. To a reaction tube equipped with a magnetic stir bar was added CoI2 (3.2 mg, 0.01 mmol), **L8** (3.5 mg, 0.015 mmol), and Zn (13.1 mg, 0.2 mmol). A solution of alkynyl sulfide **1a** (17.8 mg, 0.1 mmol) in DMF (1.0 mL) was added. The reaction tube was sealed and removed from the glove box. After stirring at room temperature for 4 h, the reaction was quenched with water (10 mL) and the mixture solution was extracted with ethyl acetate (3 × 10 mL). The combined organic layers were washed with water, brine, dried over anhydrous Na2SO4. A 0.3 mL of solution was collected, diluted with ethyl acetate (1 mL). The yields were determined by GC-MS analysis with dodecane as an internal standard.

**General Procedure 5.3. (b).** The procedure was conducted in an argon-filled glove box. To a reaction tube equipped with a magnetic stir bar was added CoI2 (3.2 mg, 0.01 mmol), **L8** (3.5 mg, 0.015 mmol), and Zn (13.1 mg, 0.2 mmol). A solution of chlorosilane **2l** (18.3 mg, 0.1 mmol) in DMF (1.0 mL) was added. The reaction tube was sealed and removed from the glove box. After stirring at room temperature for 4 h, the reaction was quenched with water (10 mL) and the mixture solution was extracted with ethyl acetate (3 × 10 mL). The combined organic layers were washed with water, brine, dried over anhydrous Na2SO4. A 0.3 mL of solution was collected, diluted with ethyl acetate (1 mL), and used for GC-MS analysis.

**General Procedure 5.3. (c).** The procedure was conducted in an argon-filled glove box. To a reaction tube equipped with a magnetic stir bar was added CoI2 (3.2 mg, 0.01 mmol), **L8** (3.5 mg, 0.015 mmol), and Zn (13.1 mg, 0.2 mmol). A solution of alkynyl sulfide **1a** (18.7 mg, 0.1 mmol), chlorosilane **2l** (36.6 mg, 0.2 mmol) and H2O (5.4 mg, 0.3 mmol) in DMF (1.0 mL) was added. The reaction tube was sealed and removed from the glove box. After stirring at room temperature for 4 h, the reaction was quenched with water (10 mL) and the mixture solution was extracted with ethyl acetate (3 × 10 mL). The combined organic layers were washed with water, brine, dried over anhydrous Na2SO4. A 0.4 mL of solution was collected, diluted with ethyl acetate (1 mL), and used for GC-MS analysis.

**6. NMR Spectra**

**1b; 1H NMR (400 MHz, CDCl3); 13C NMR (101 MHz, CDCl3)**


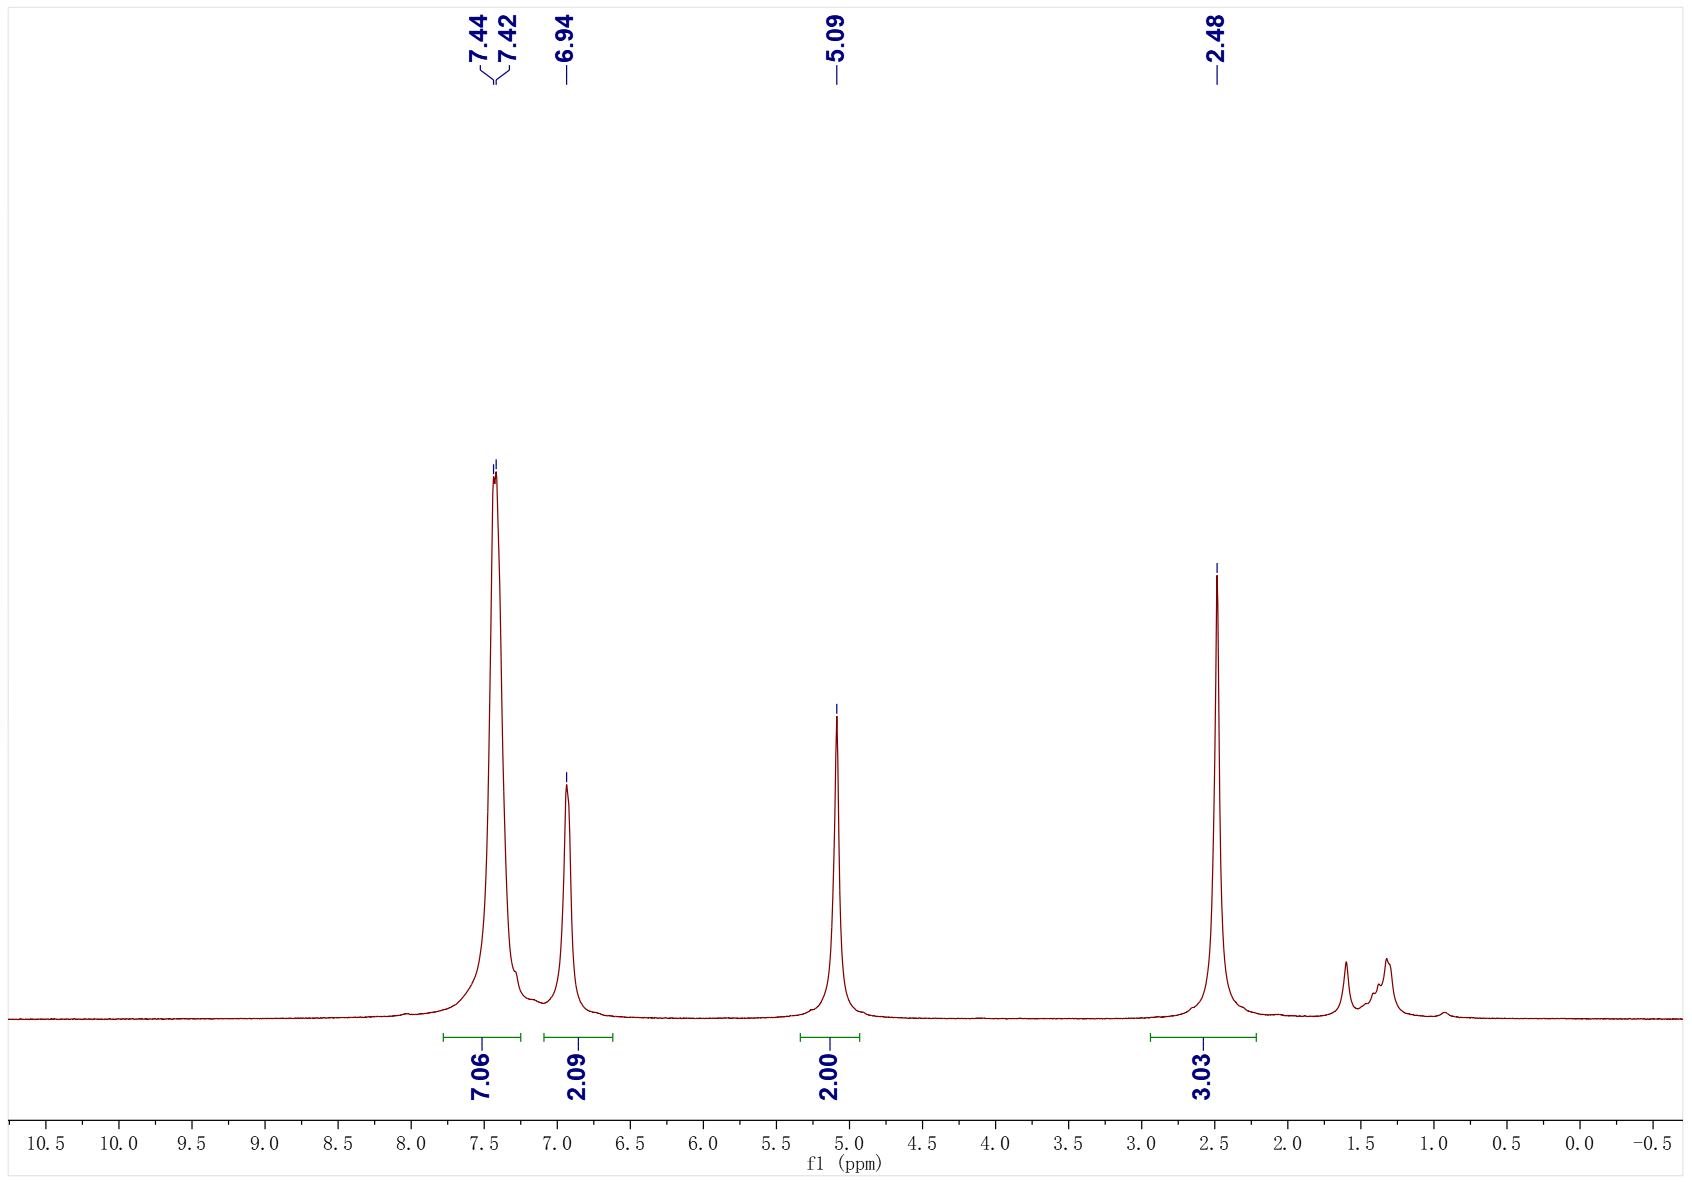


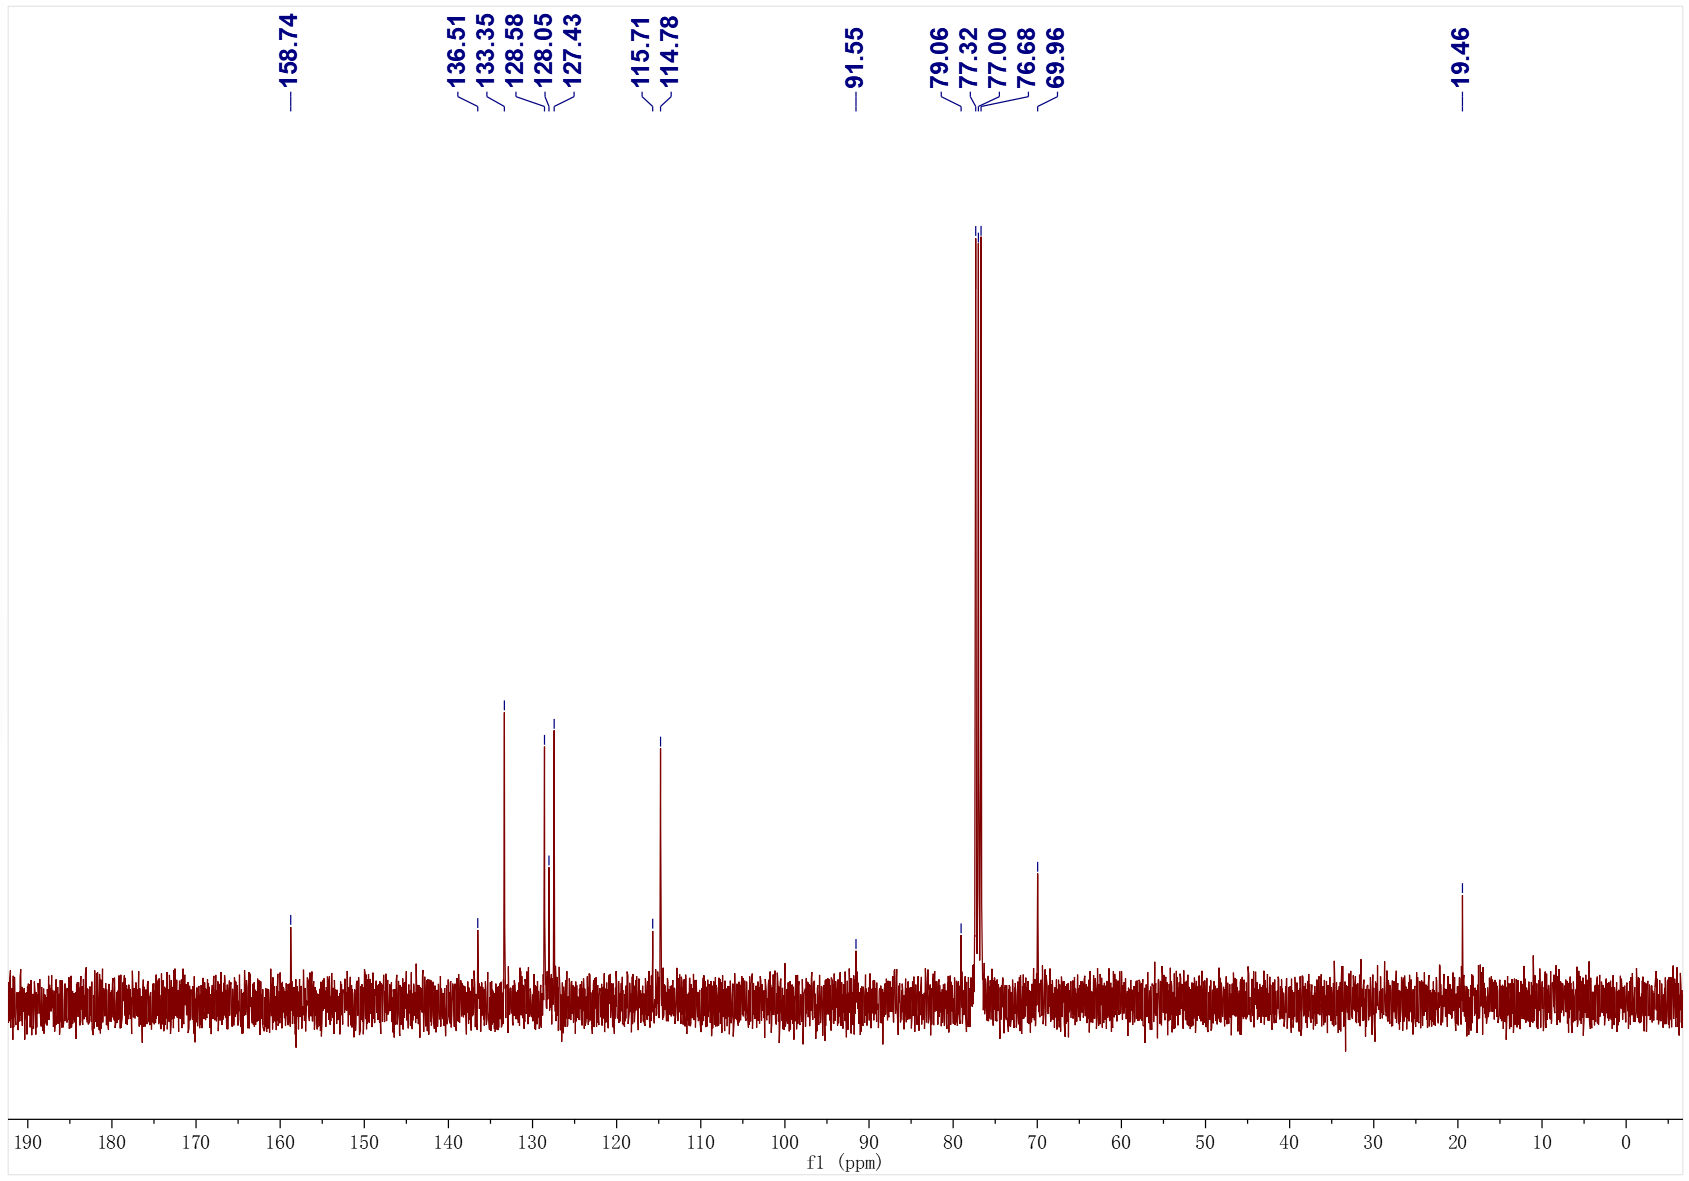


**1f; 1H NMR (500 MHz, CDCl3); 13C NMR (126 MHz, CDCl3)**


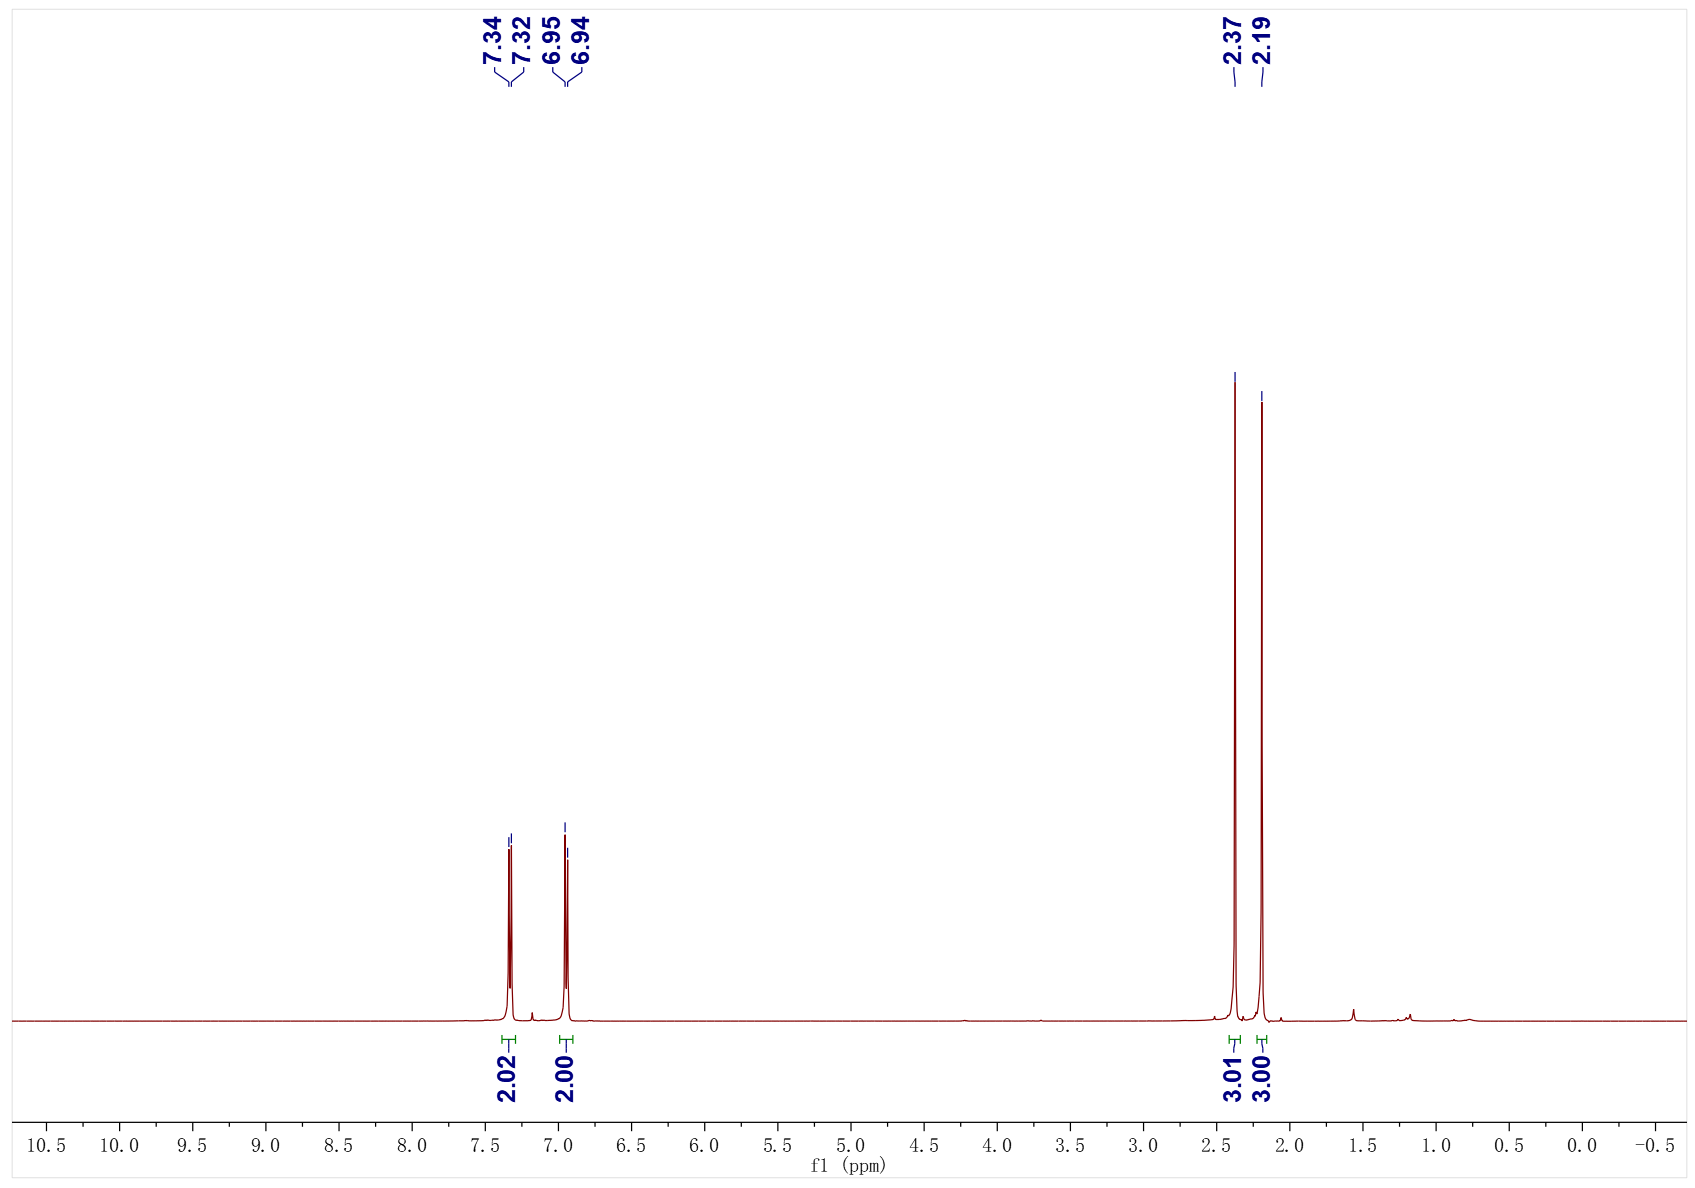

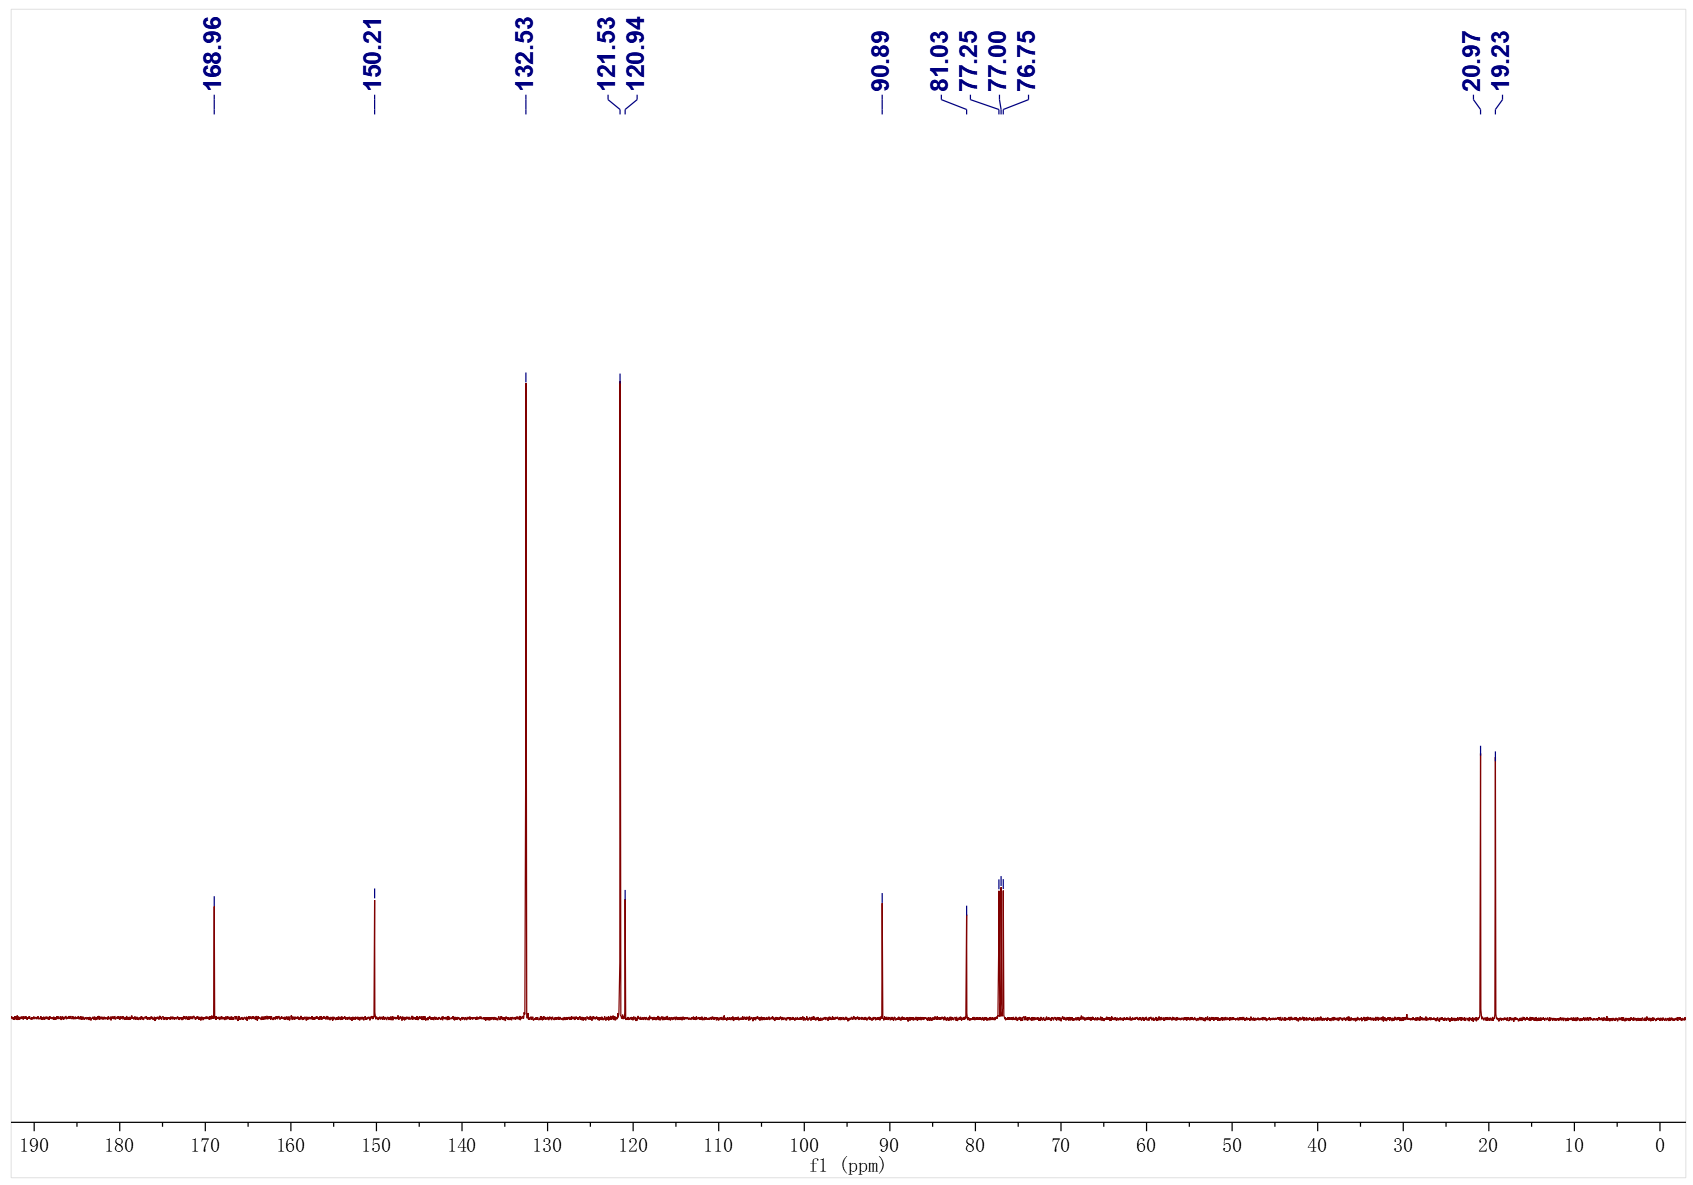


**1g; 1H NMR (500 MHz, CDCl3); 13C NMR (126 MHz, CDCl3)**


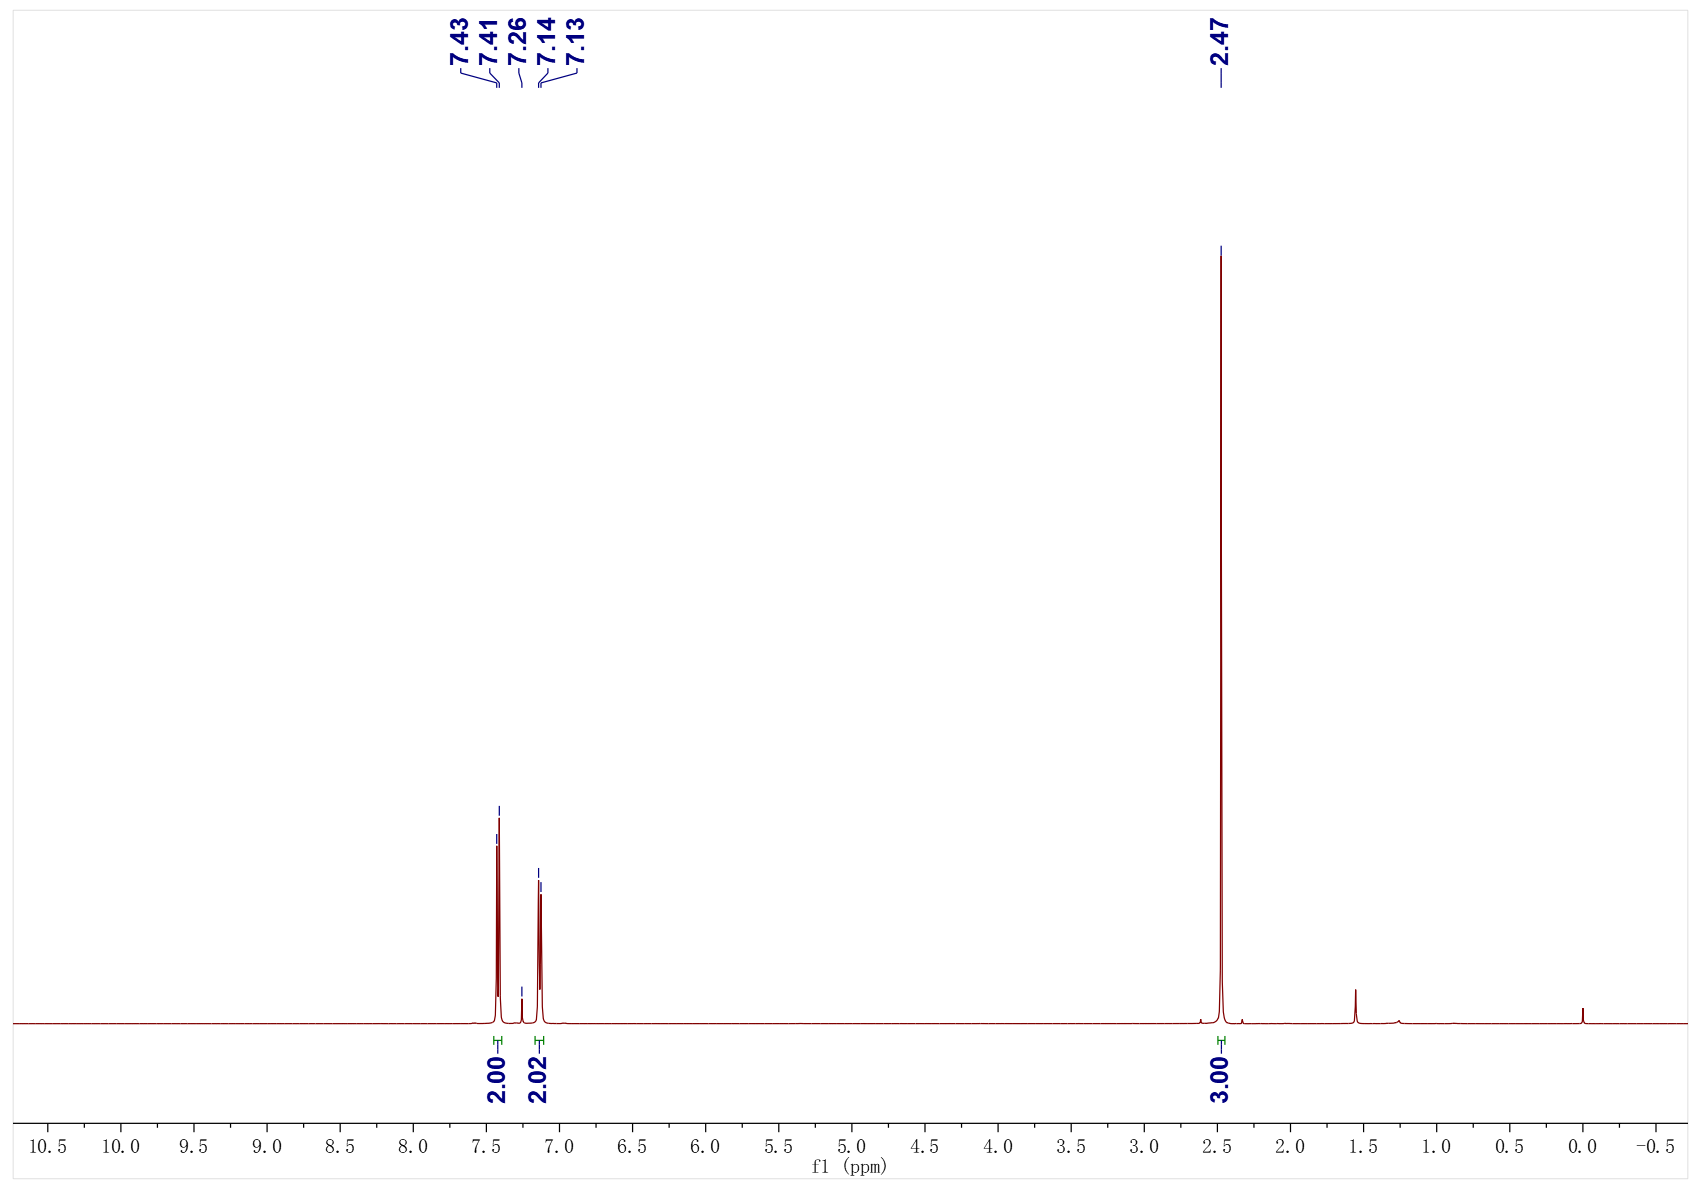

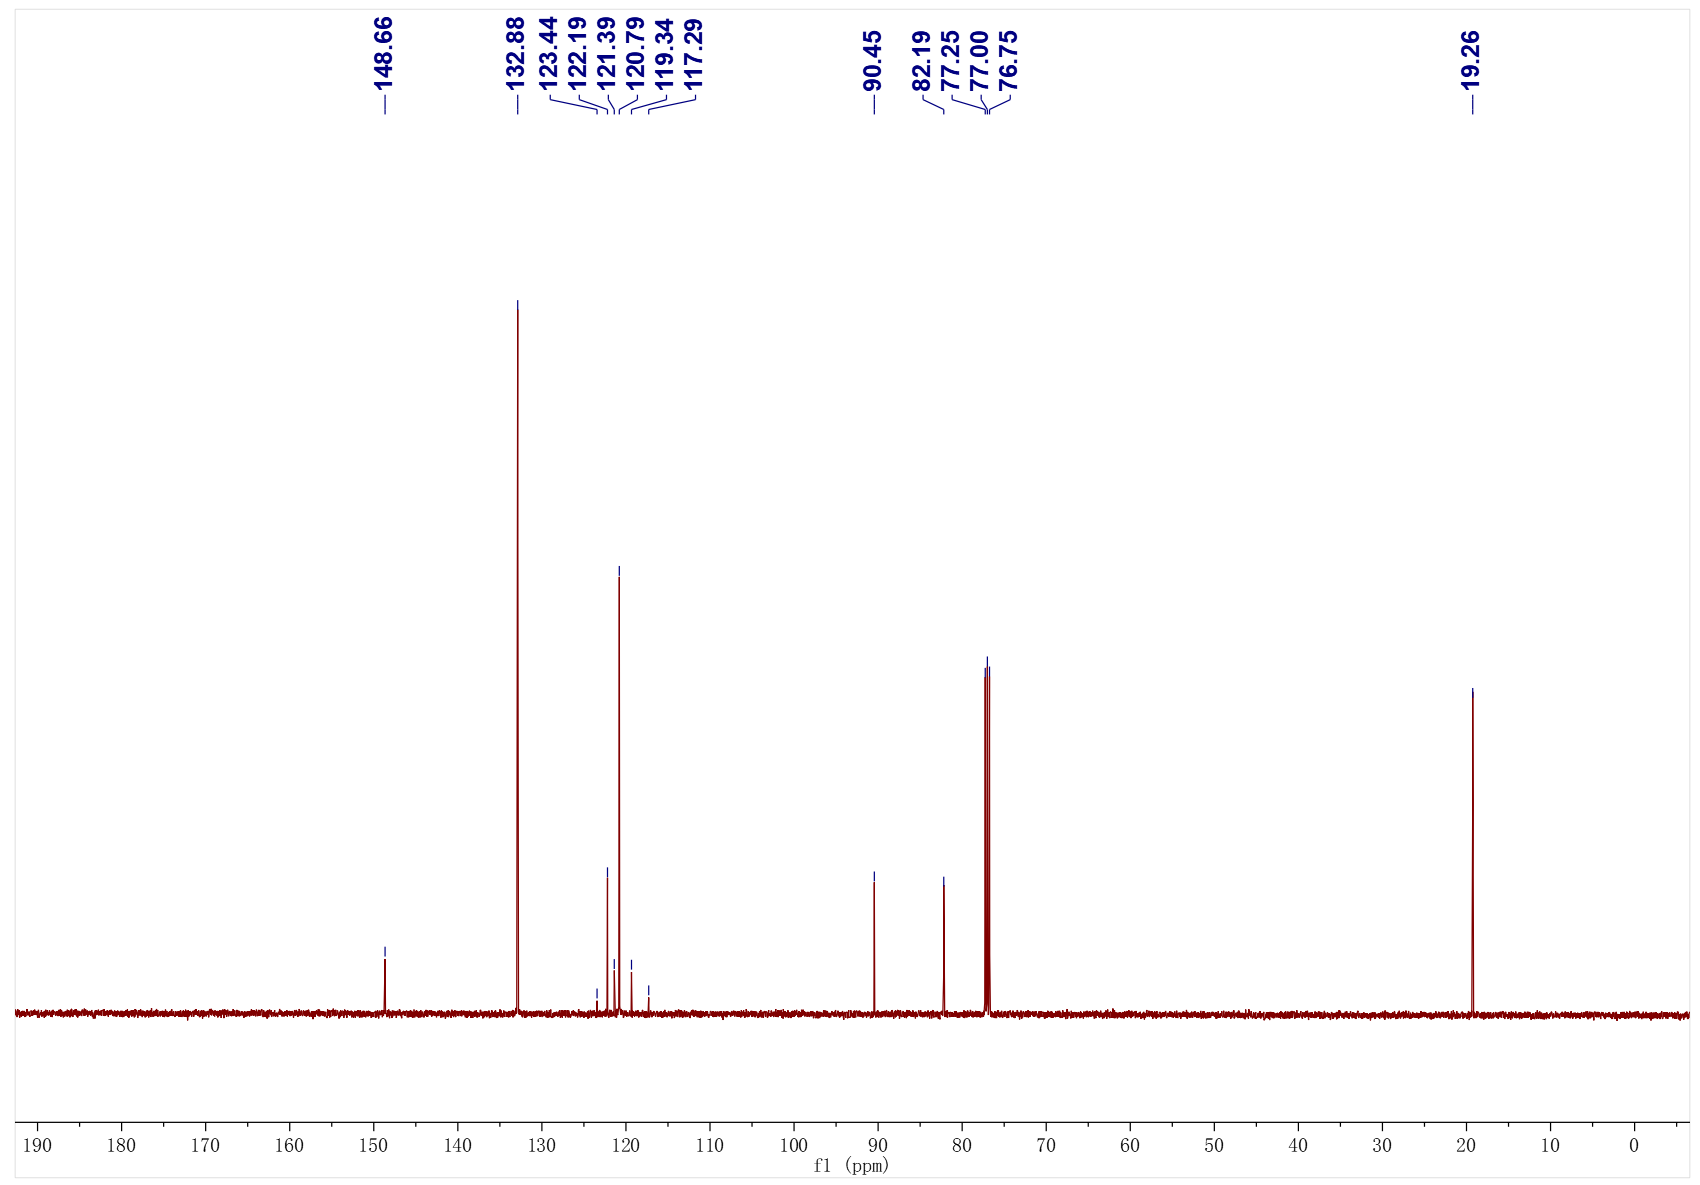


**1g; 19F NMR (471 MHz, CDCl3)**


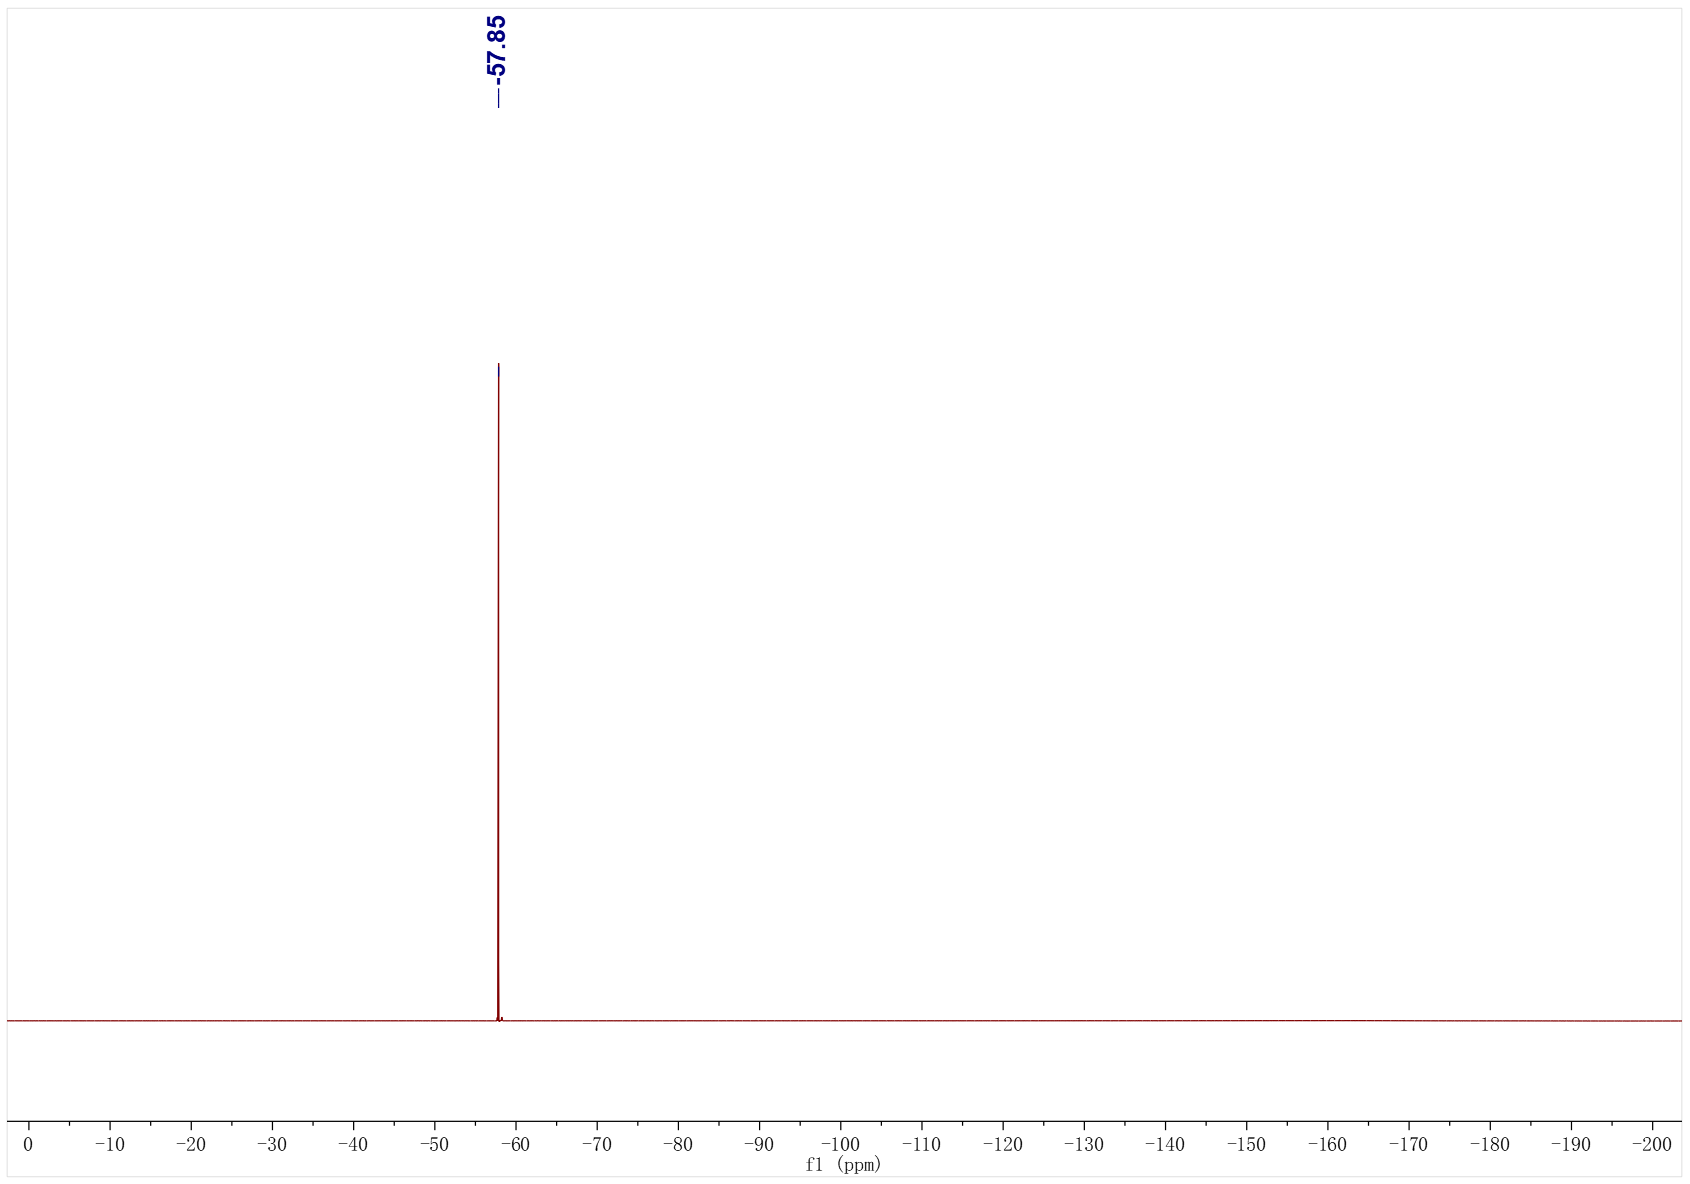


**1o; 1H NMR (500 MHz, CDCl3); 13C NMR (126 MHz, CDCl3)**


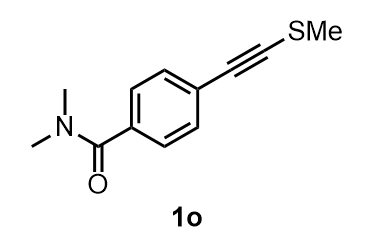

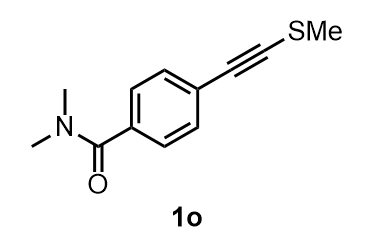

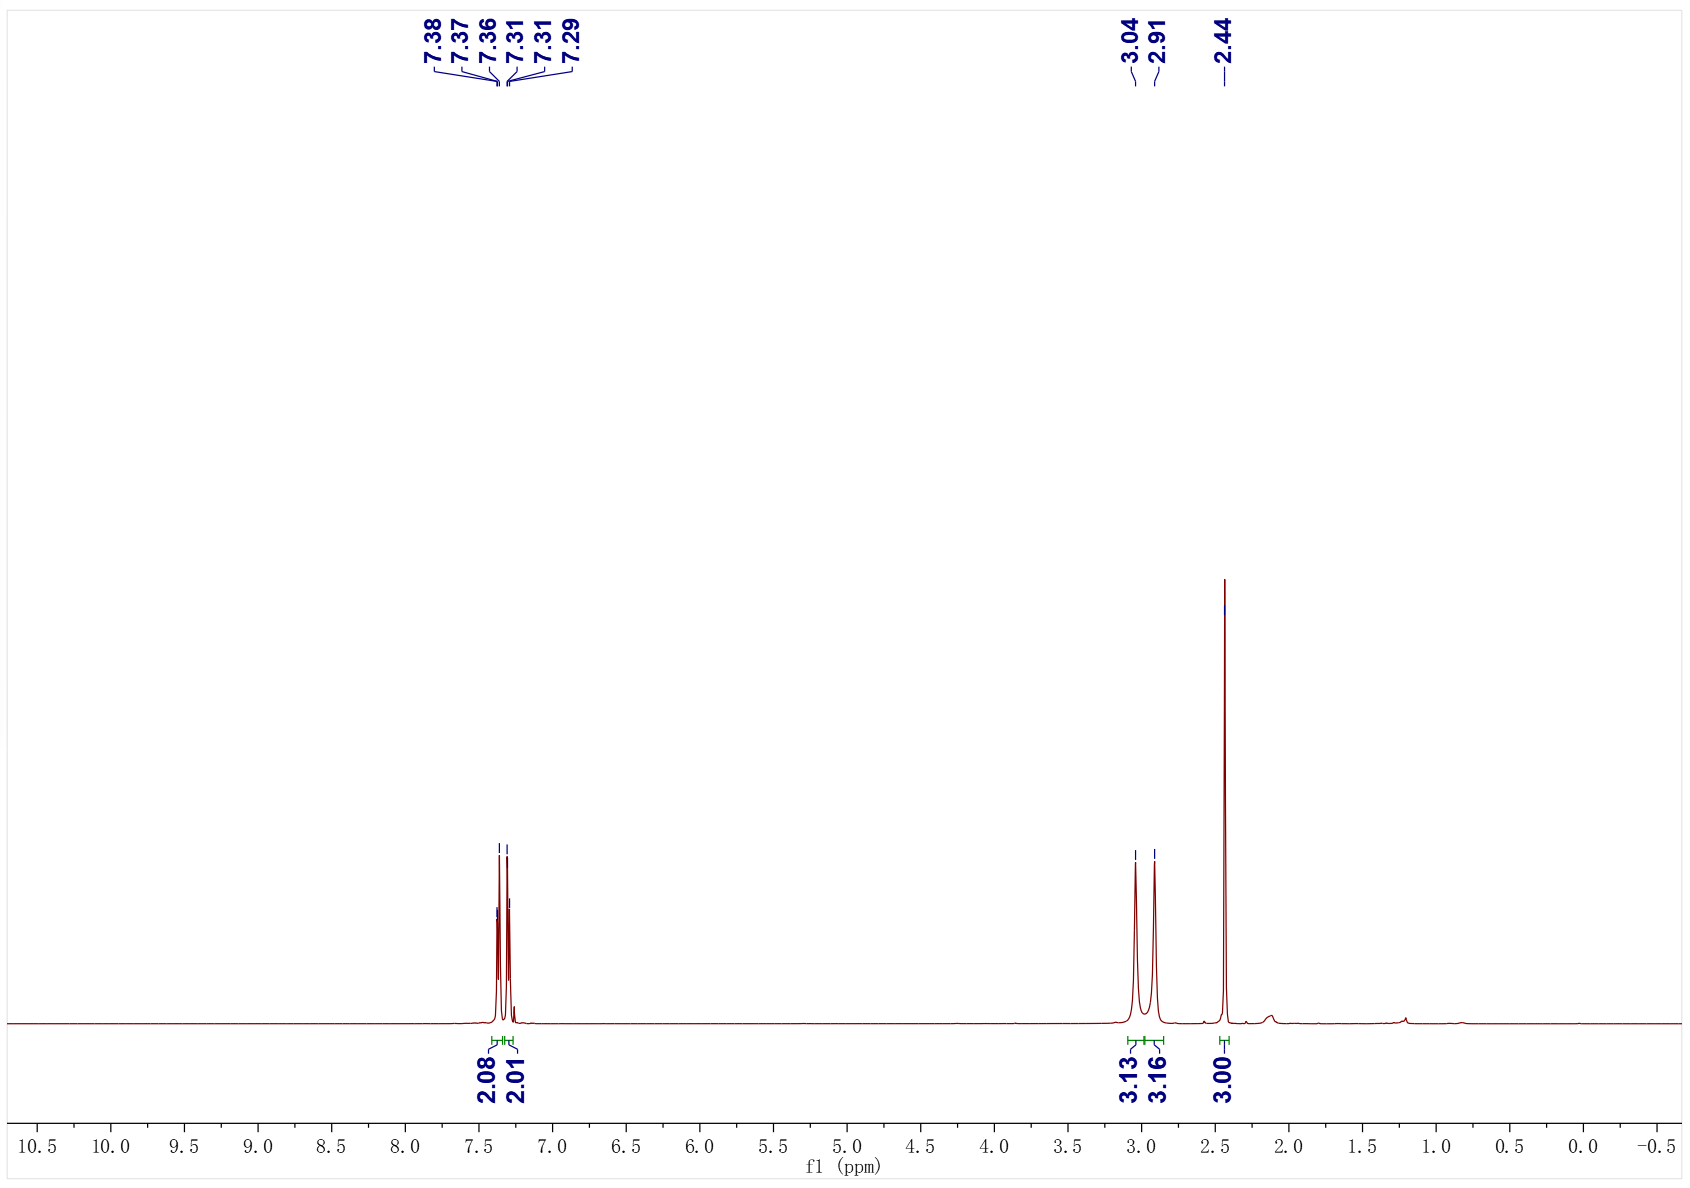

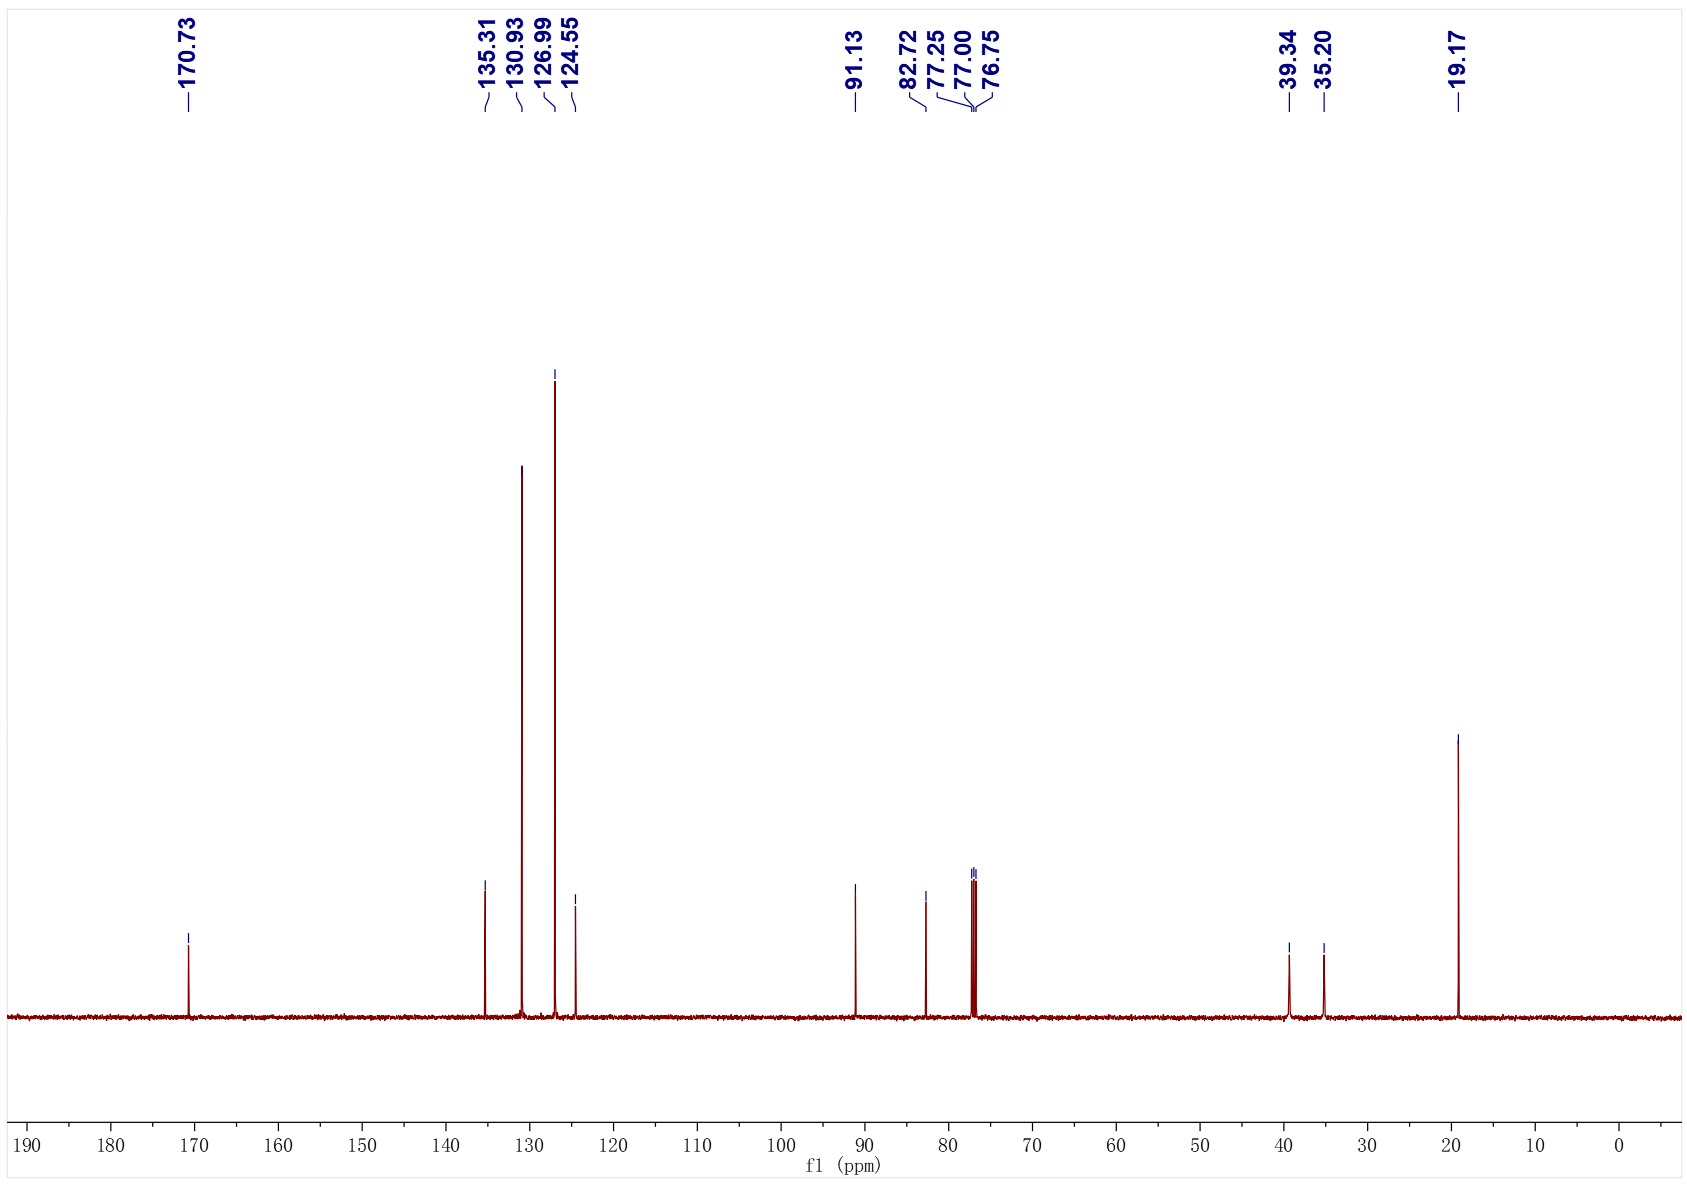


**1p; 1H NMR (500 MHz, CDCl3); 13C NMR (126 MHz, CDCl3)**


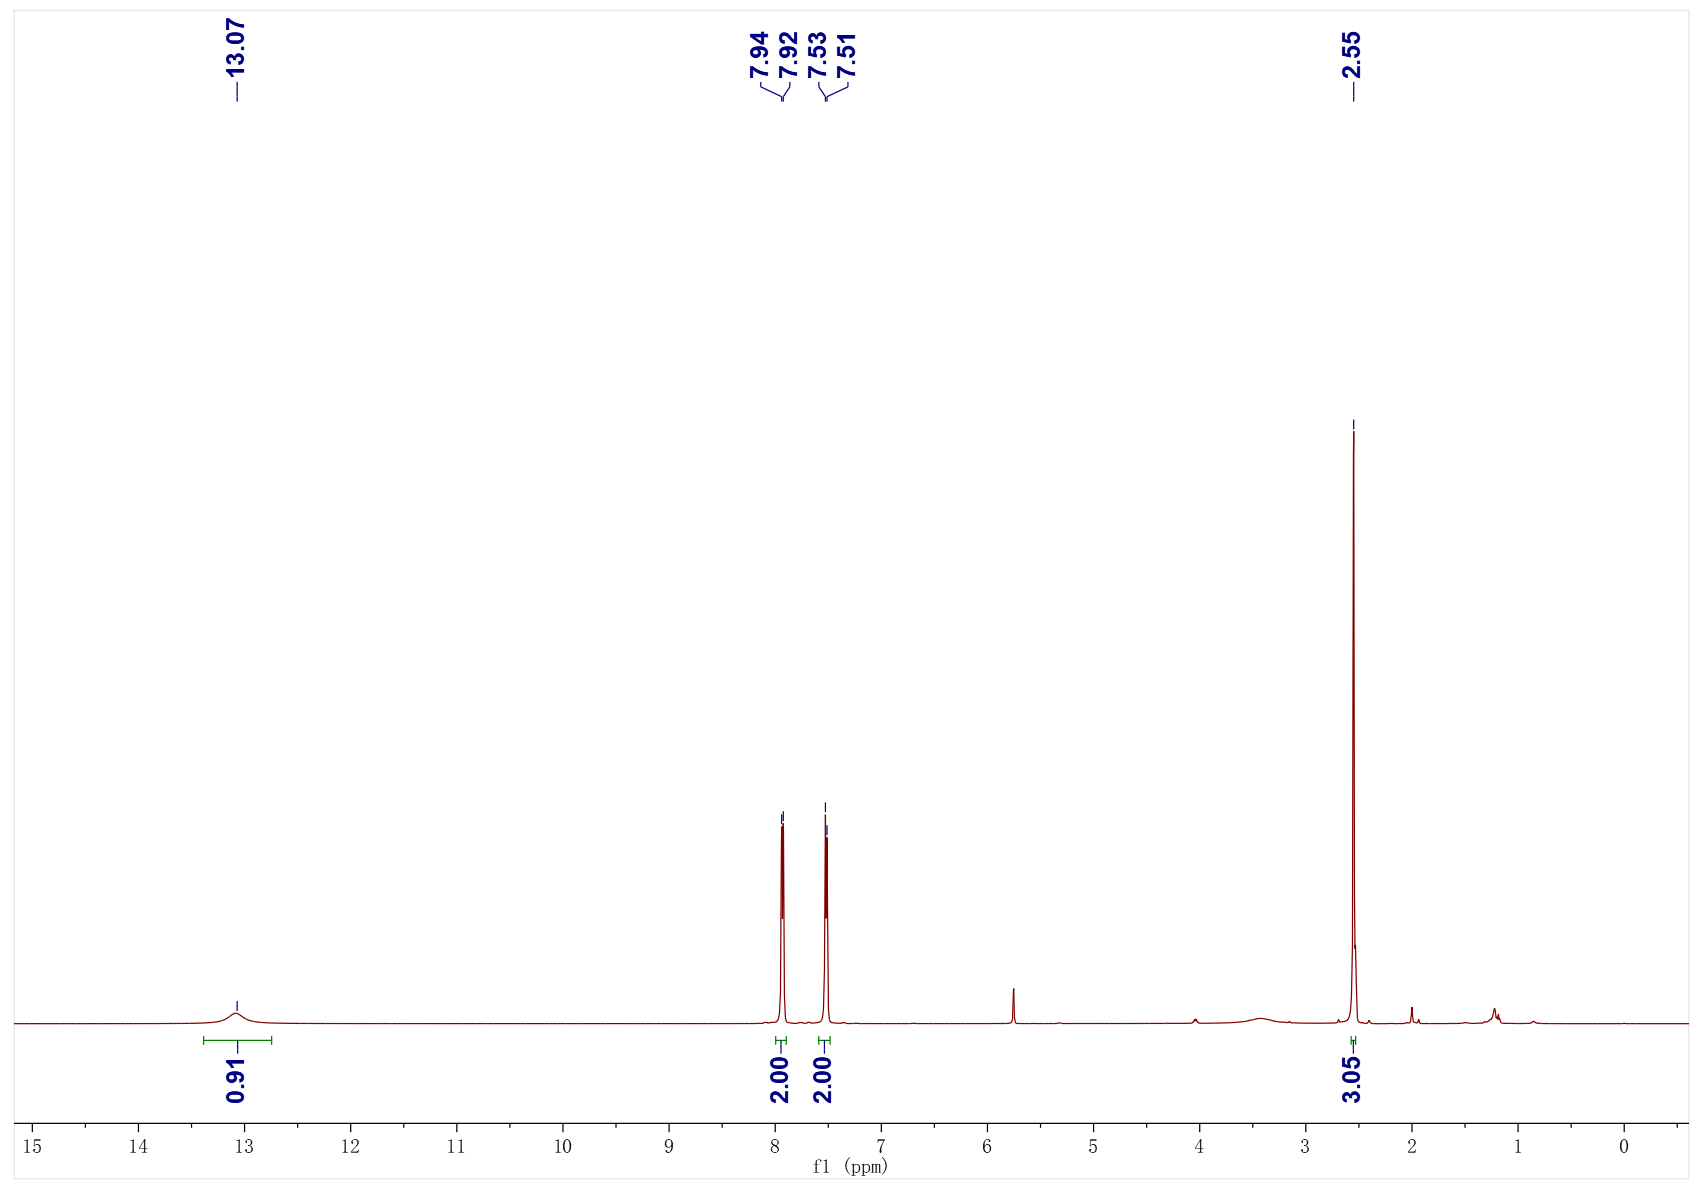

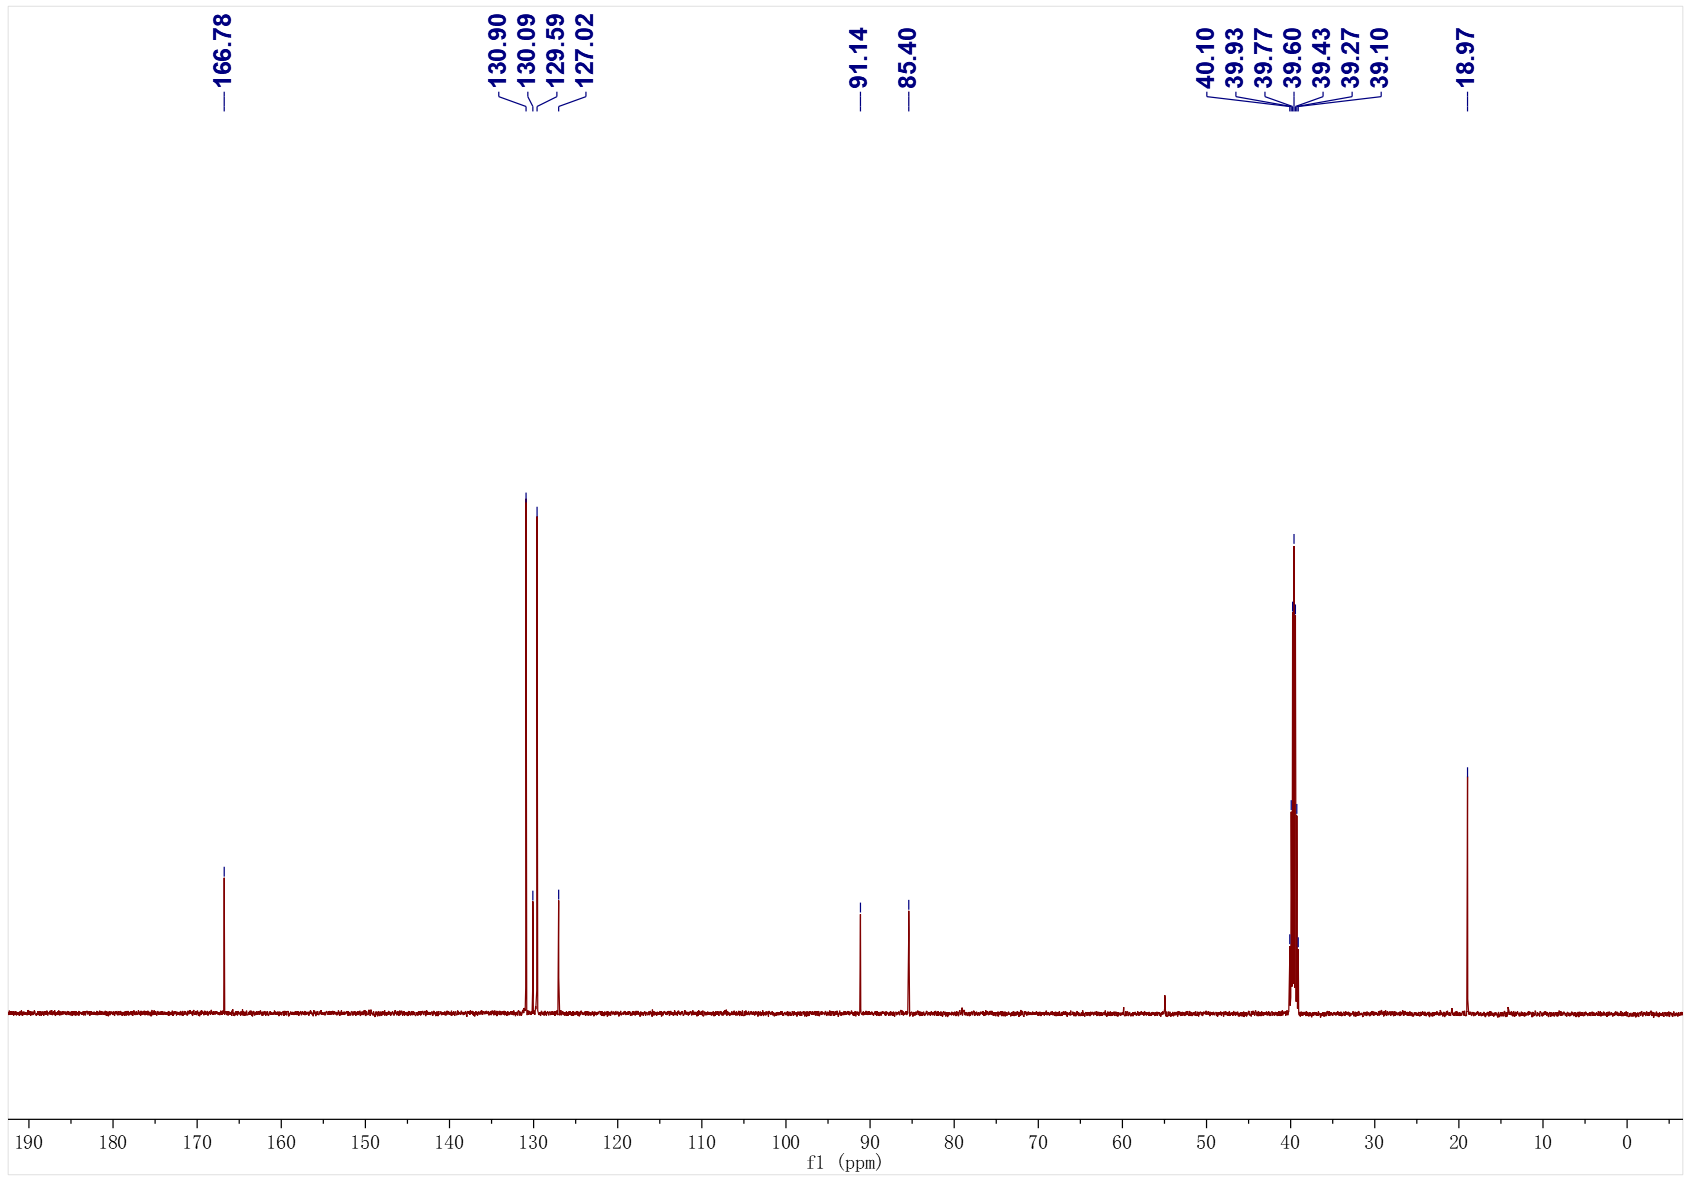


**1r; 1H NMR (500 MHz, CDCl3); 13C NMR (126 MHz, CDCl3)**


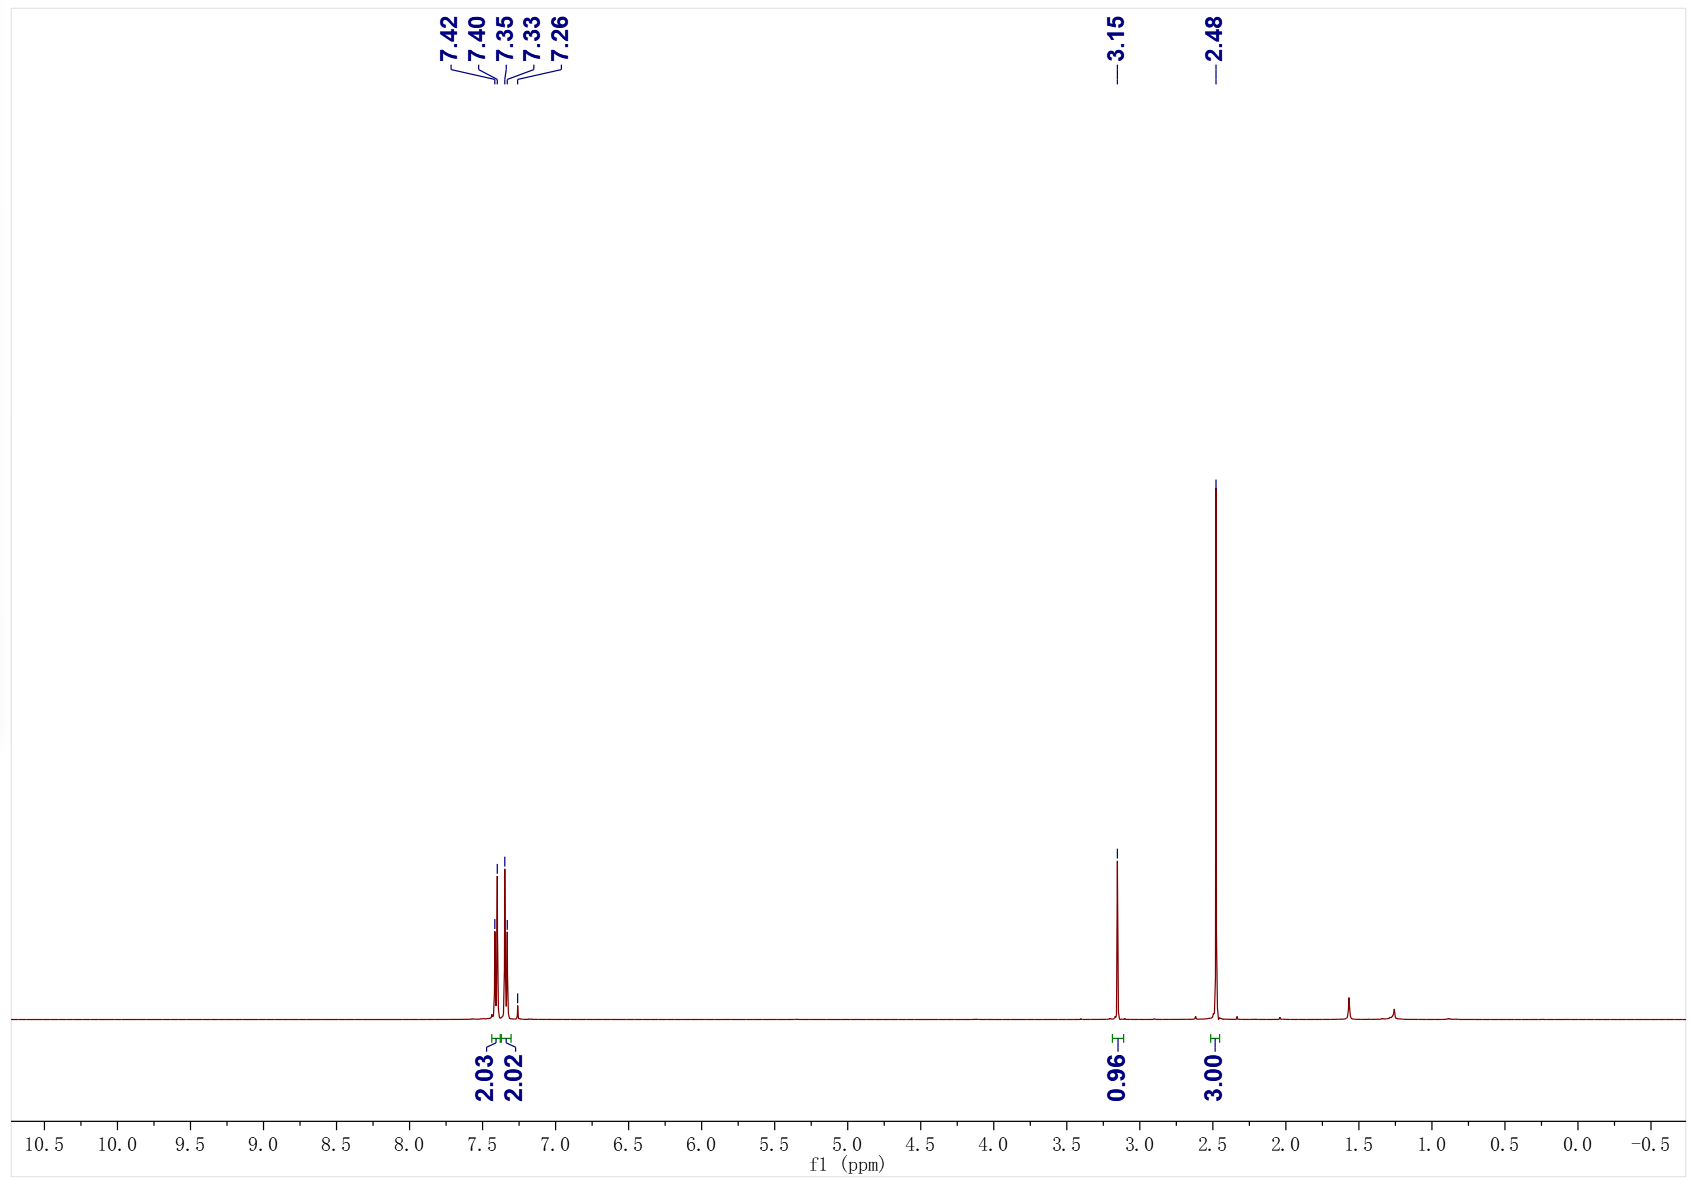

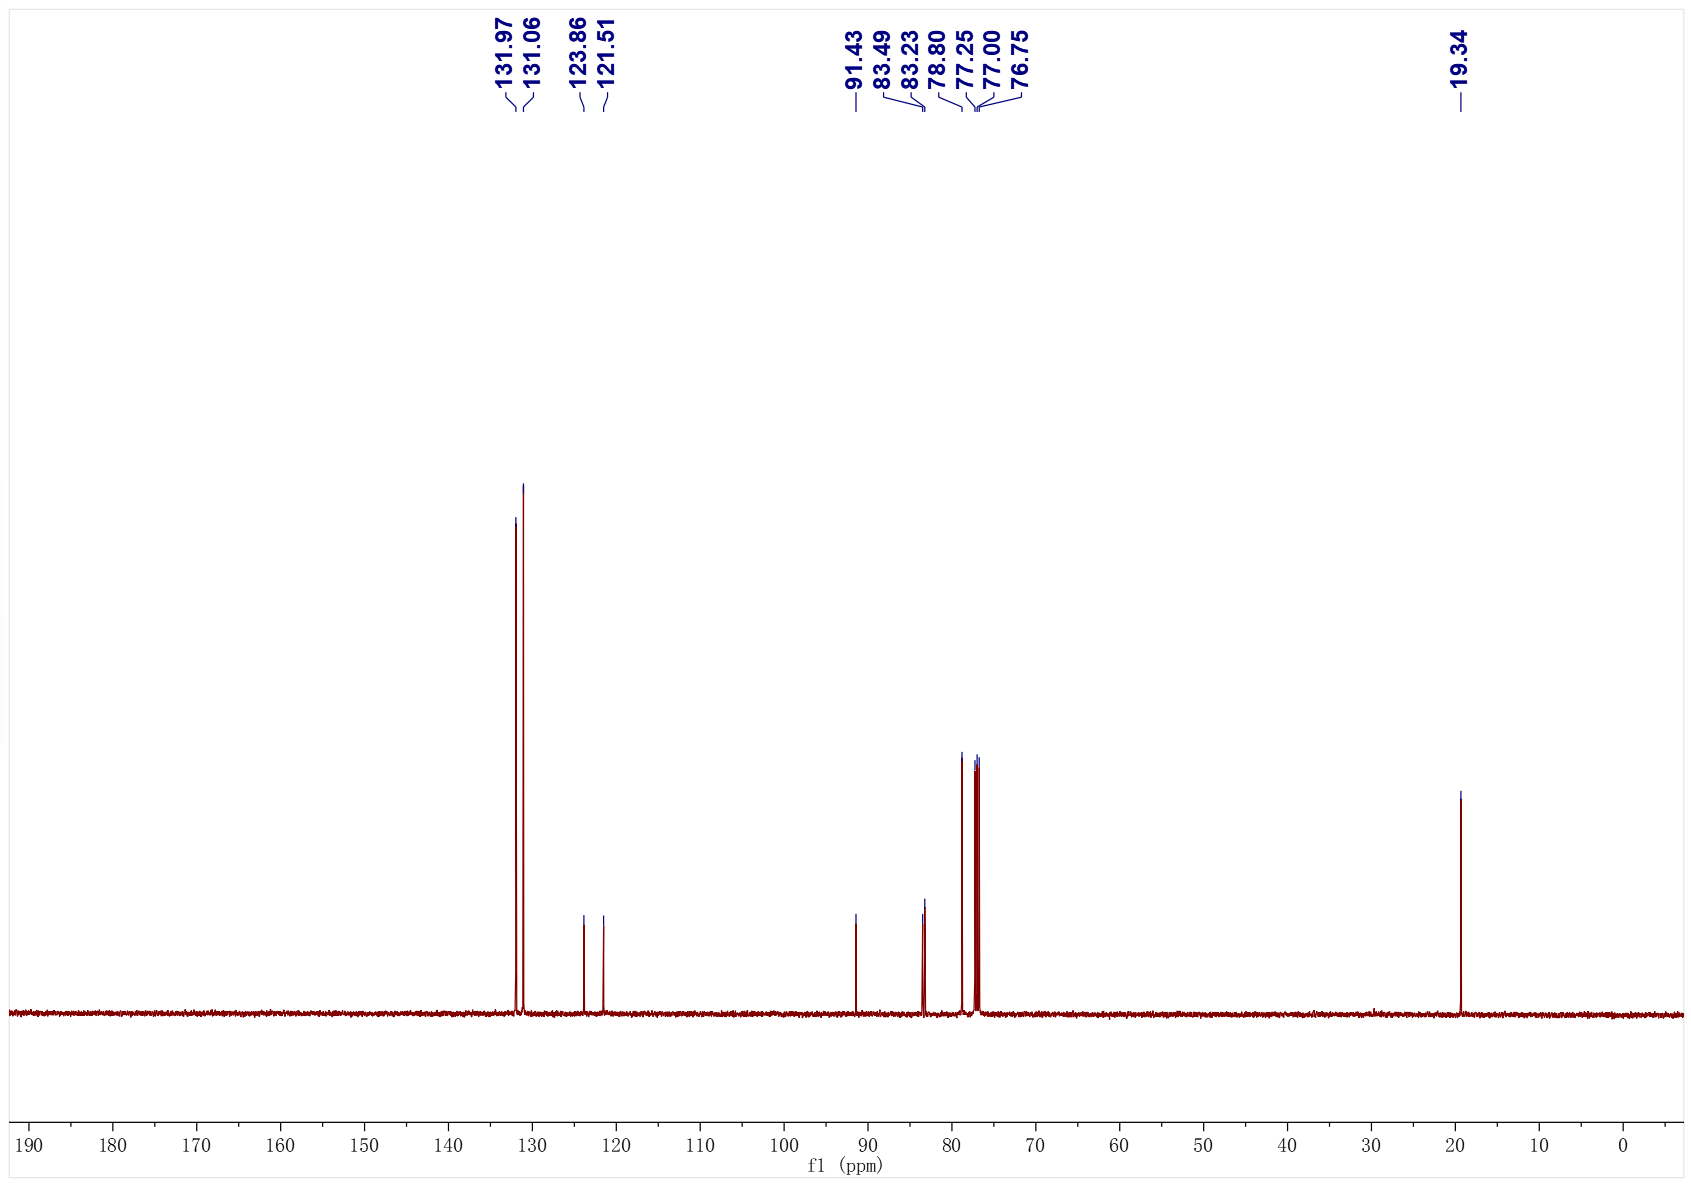


**1ae; 1H NMR (400 MHz, CDCl3); 13C NMR (101 MHz, CDCl3)**


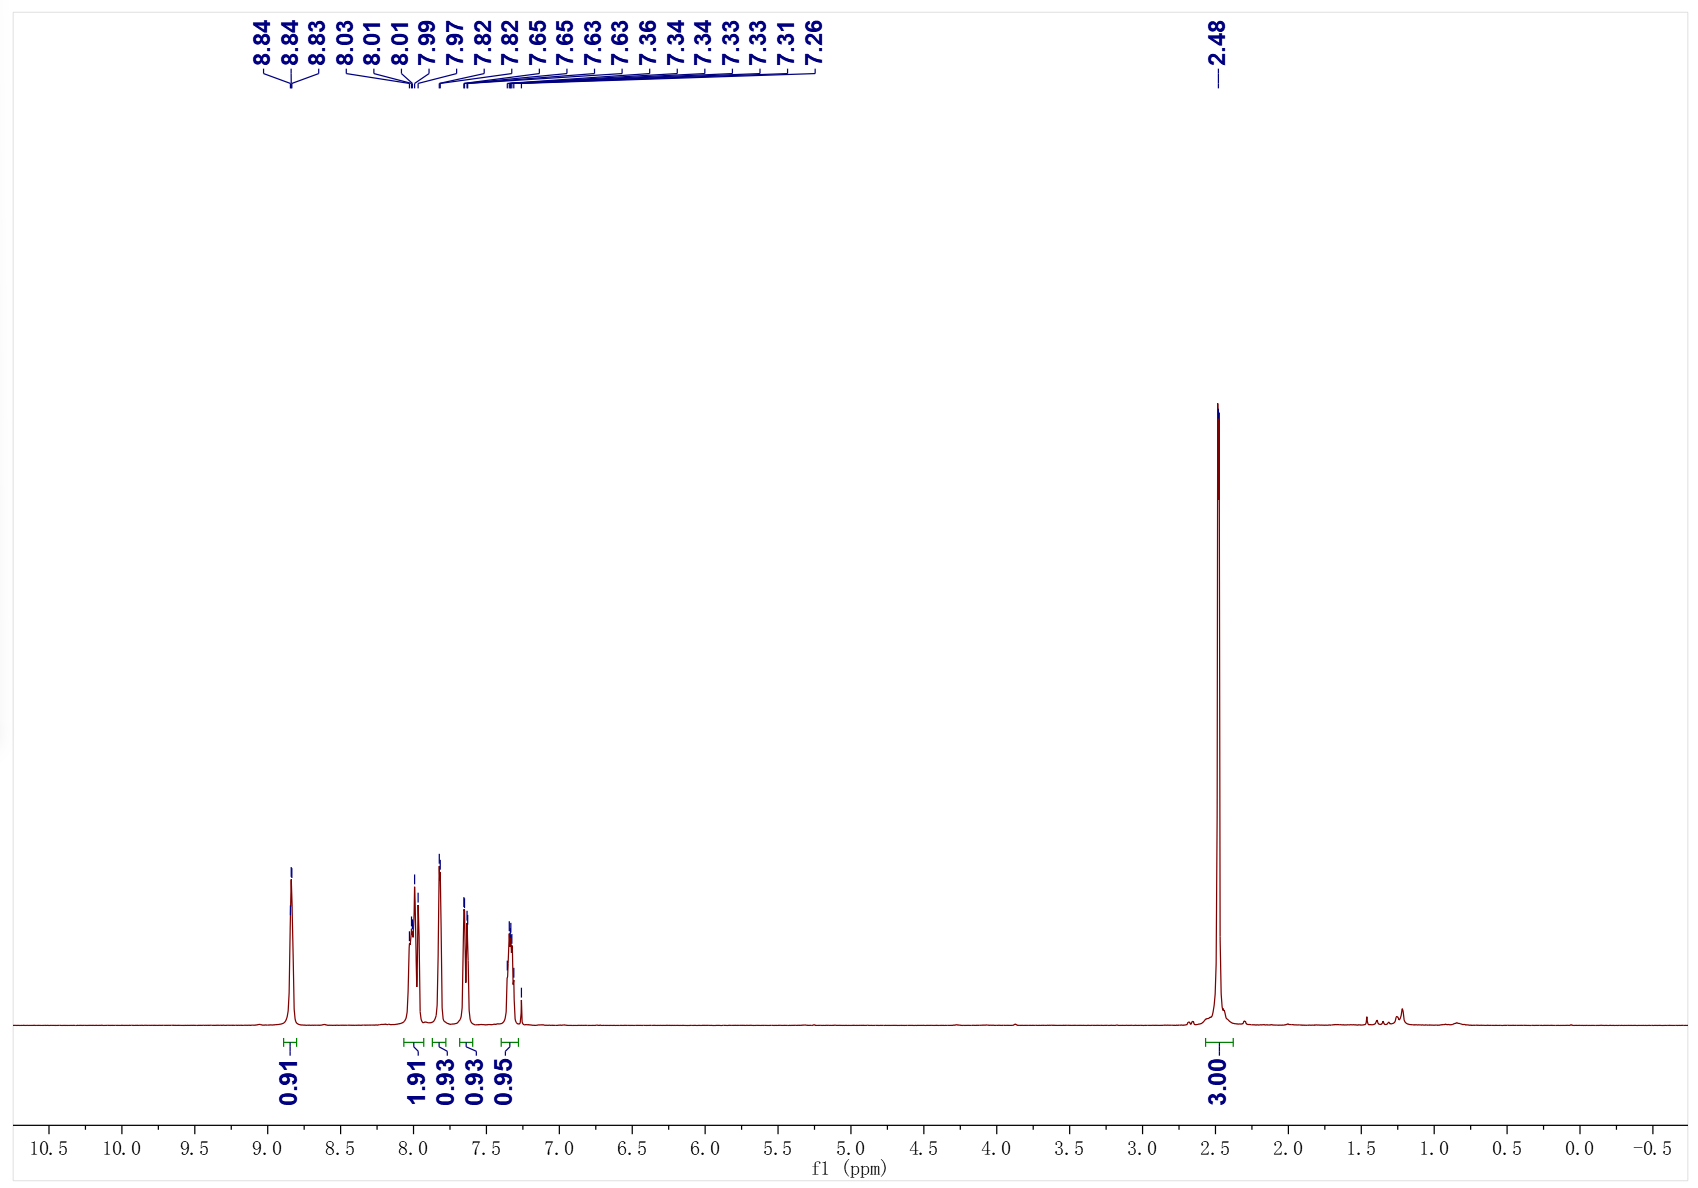

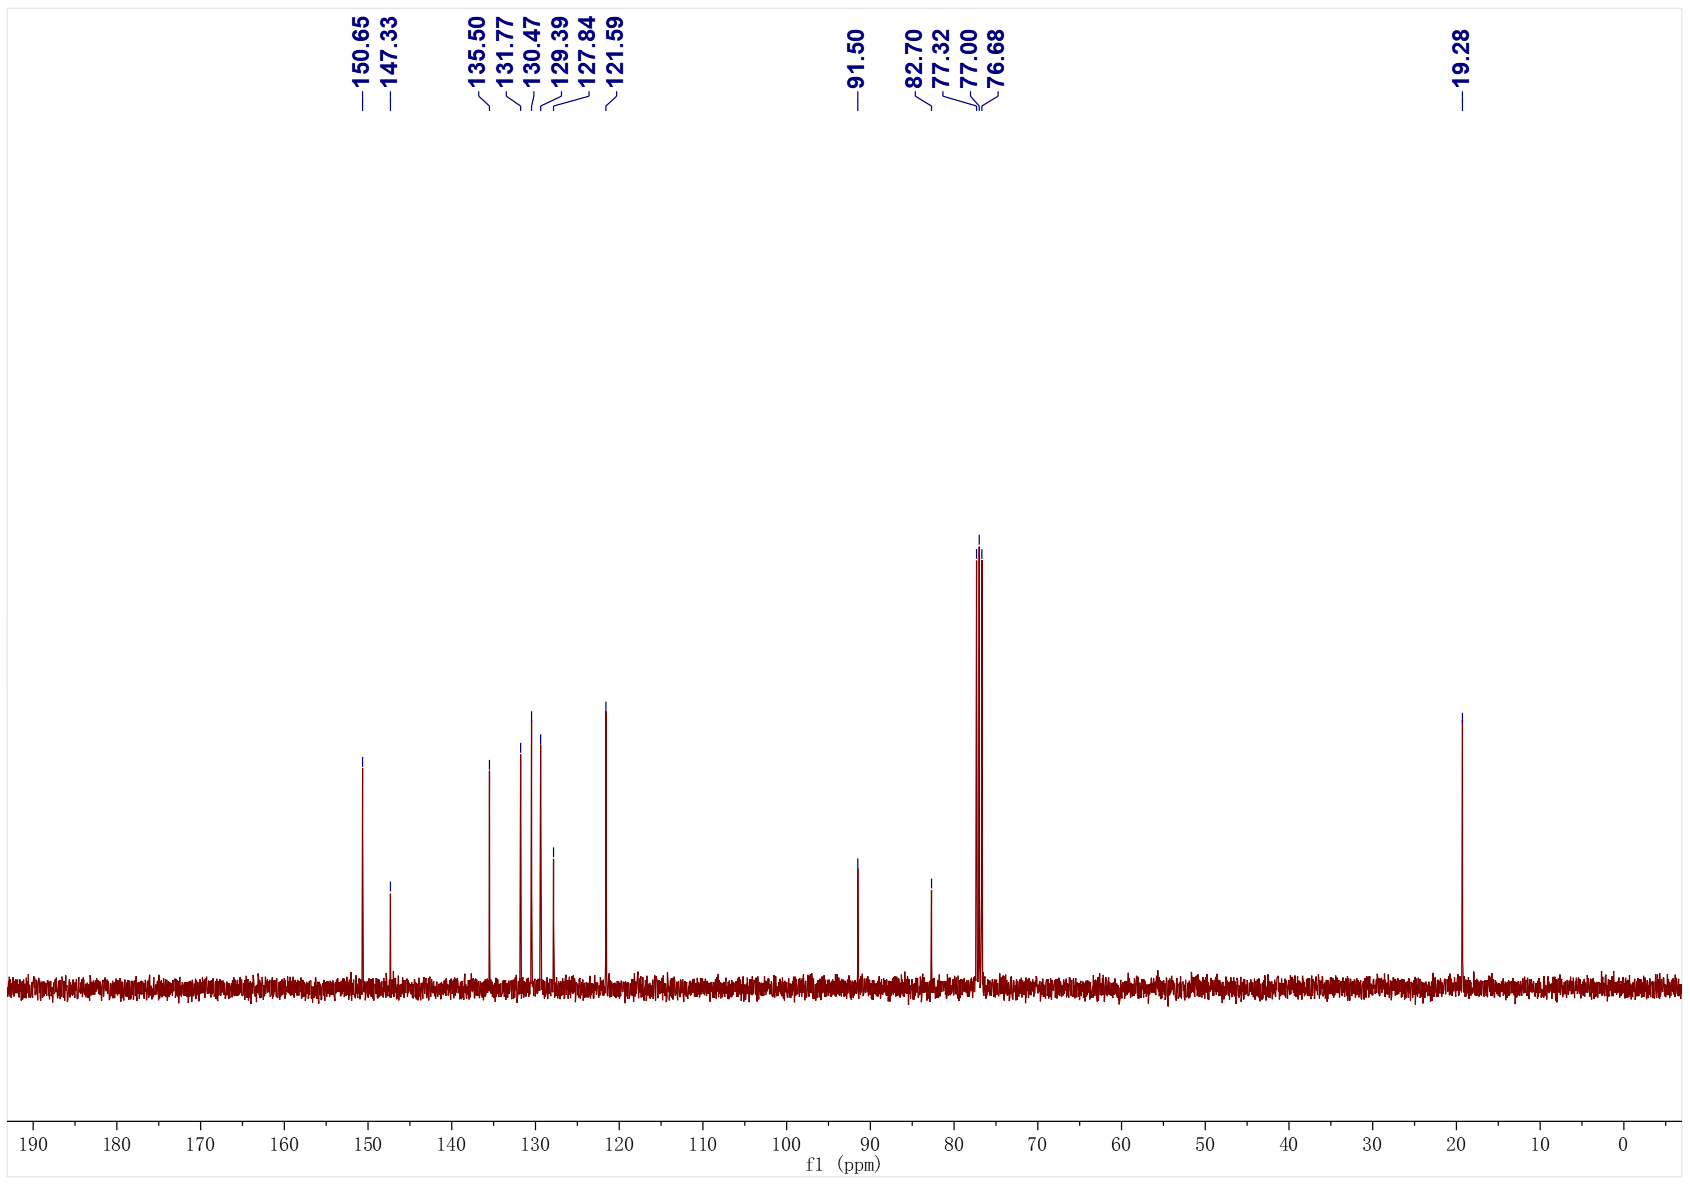


**1ah; 1H NMR (500 MHz, CDCl3); 13C NMR (126 MHz, CDCl3)**


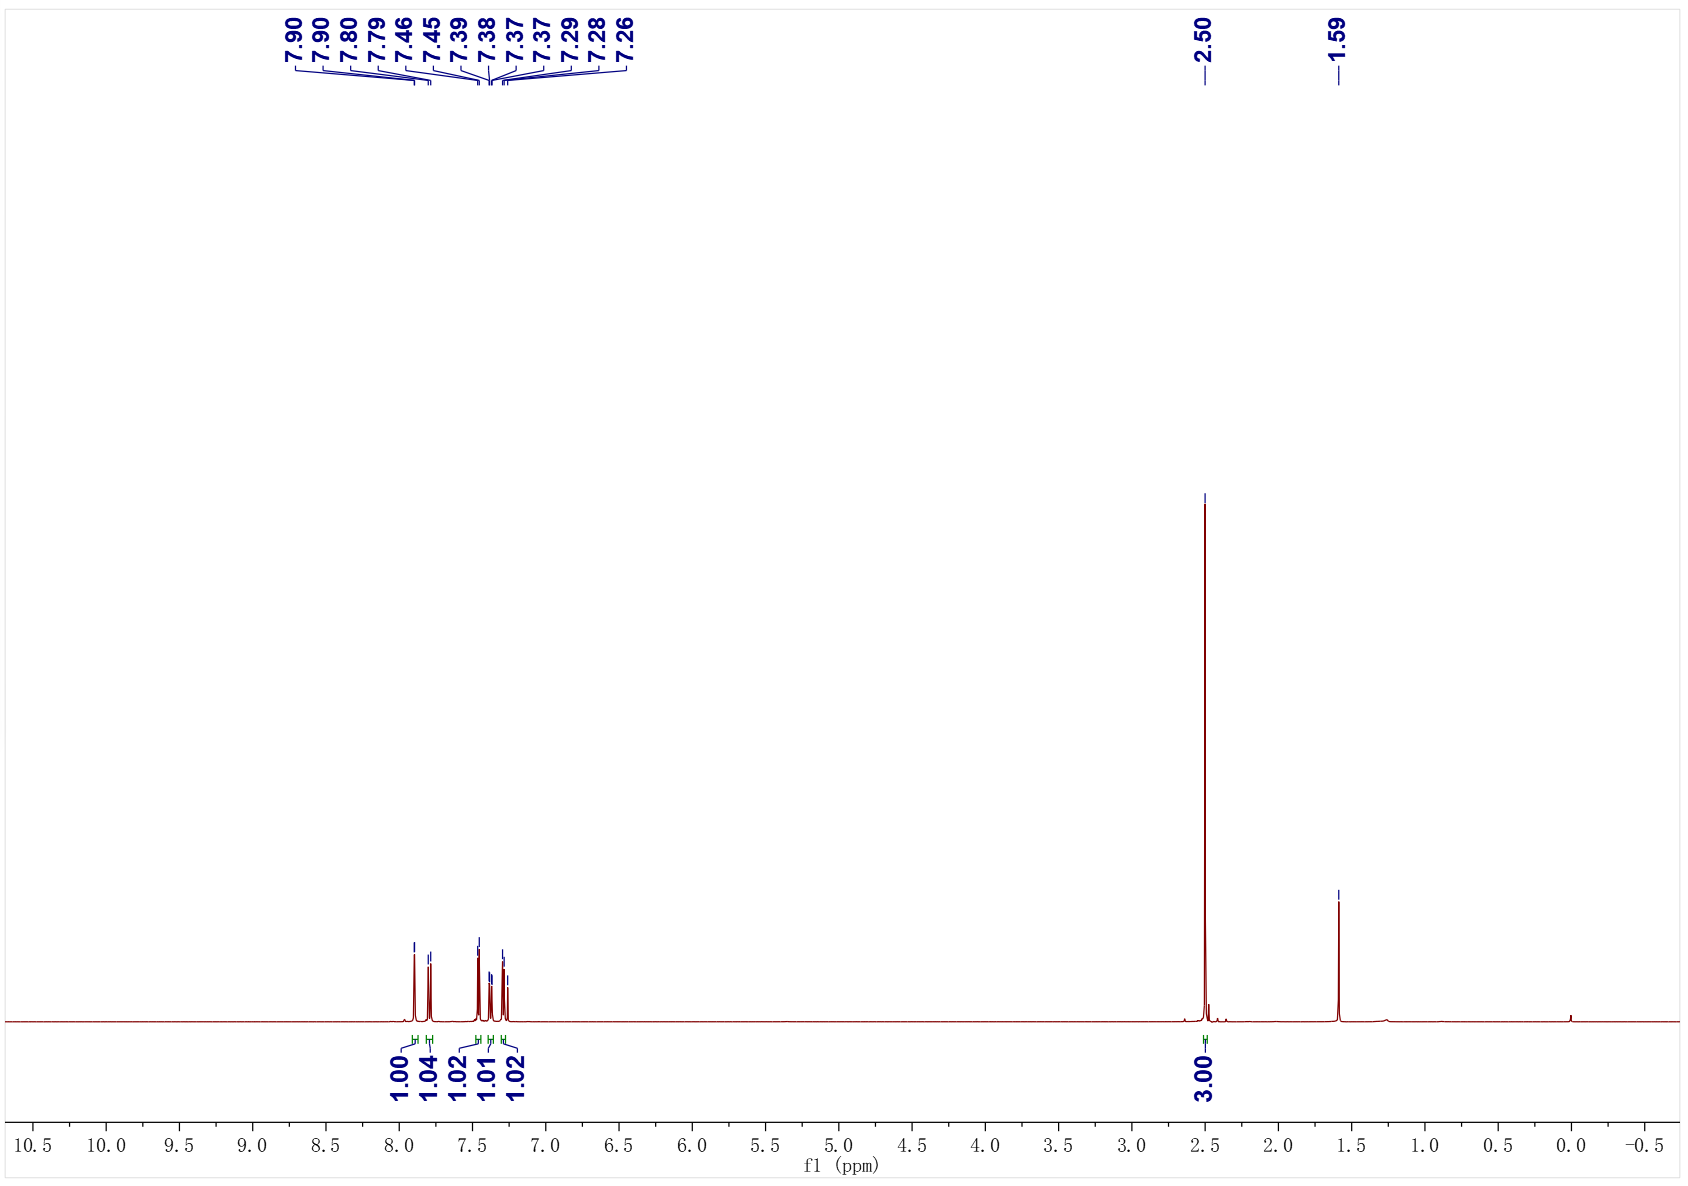

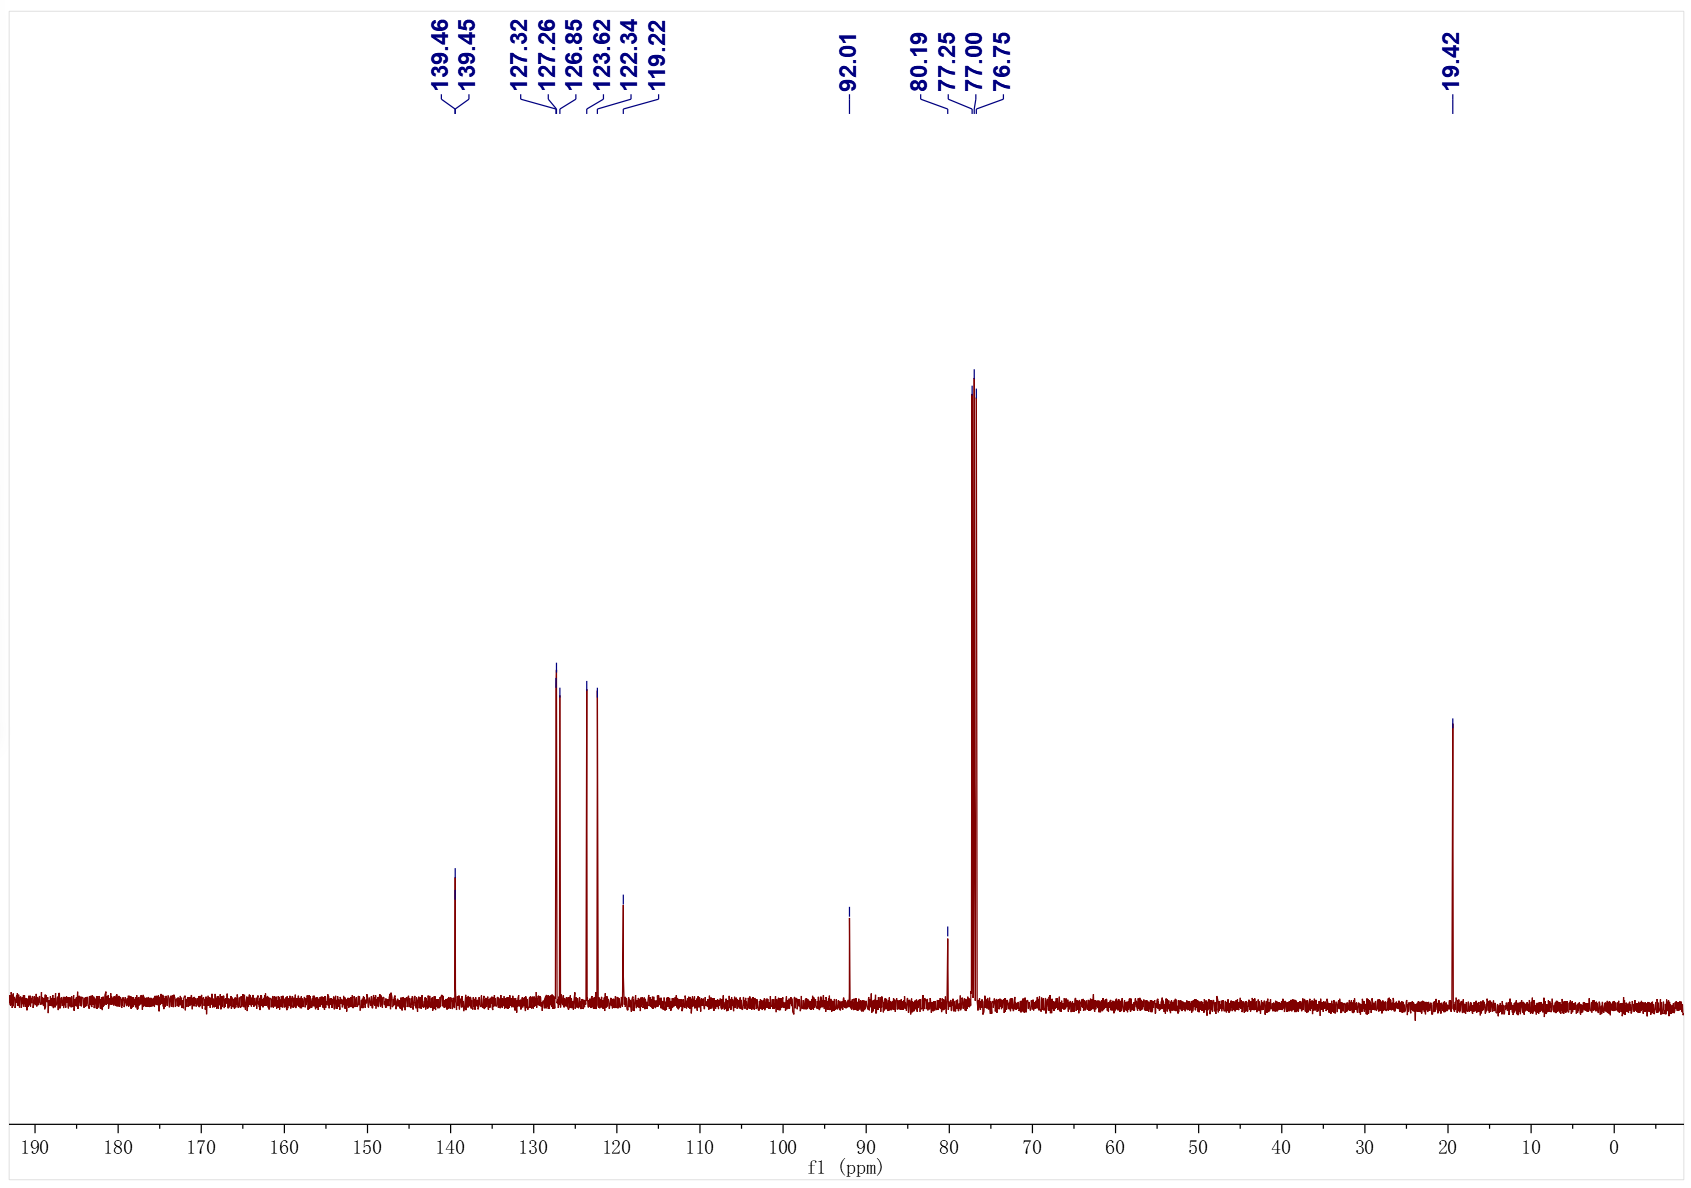


**1ai; 1H NMR (500 MHz, CDCl3); 13C NMR (126 MHz, CDCl3)**


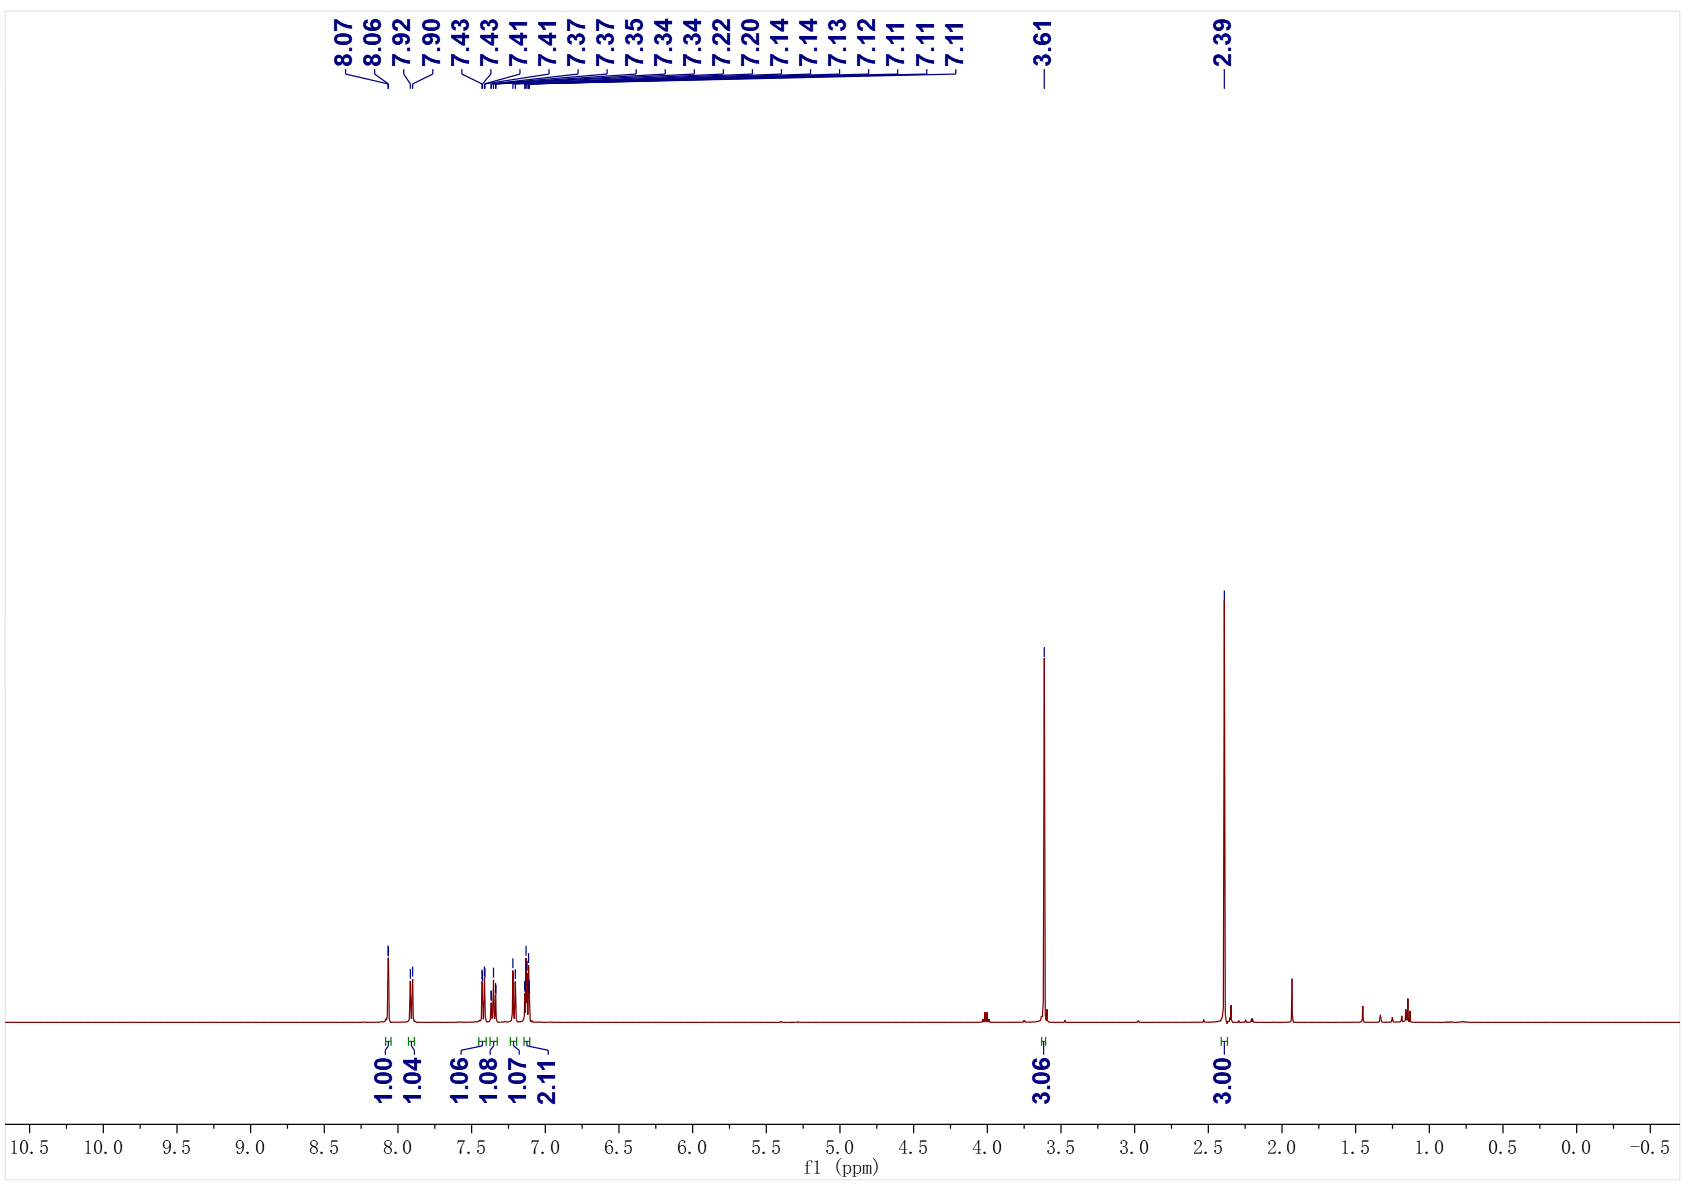


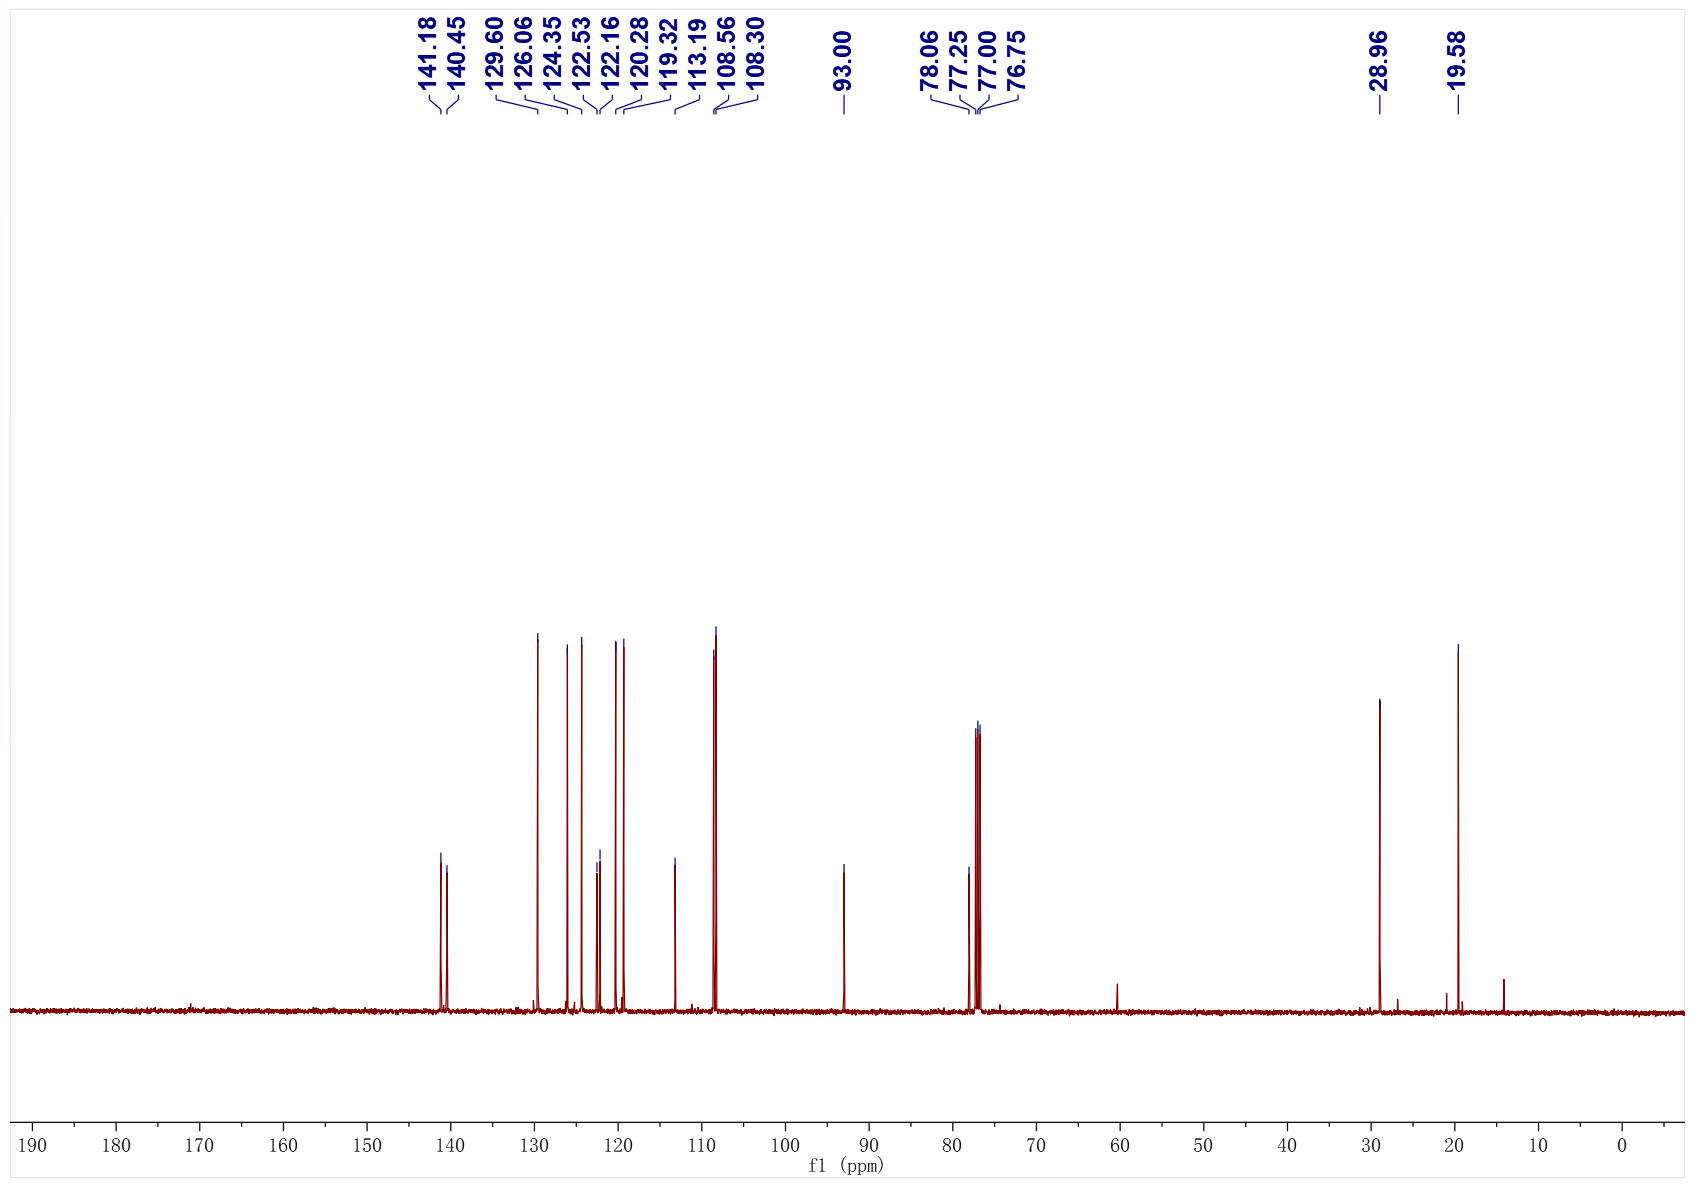


**1aj; 1H NMR (400 MHz, CDCl3); 13C NMR (101 MHz, CDCl3)**


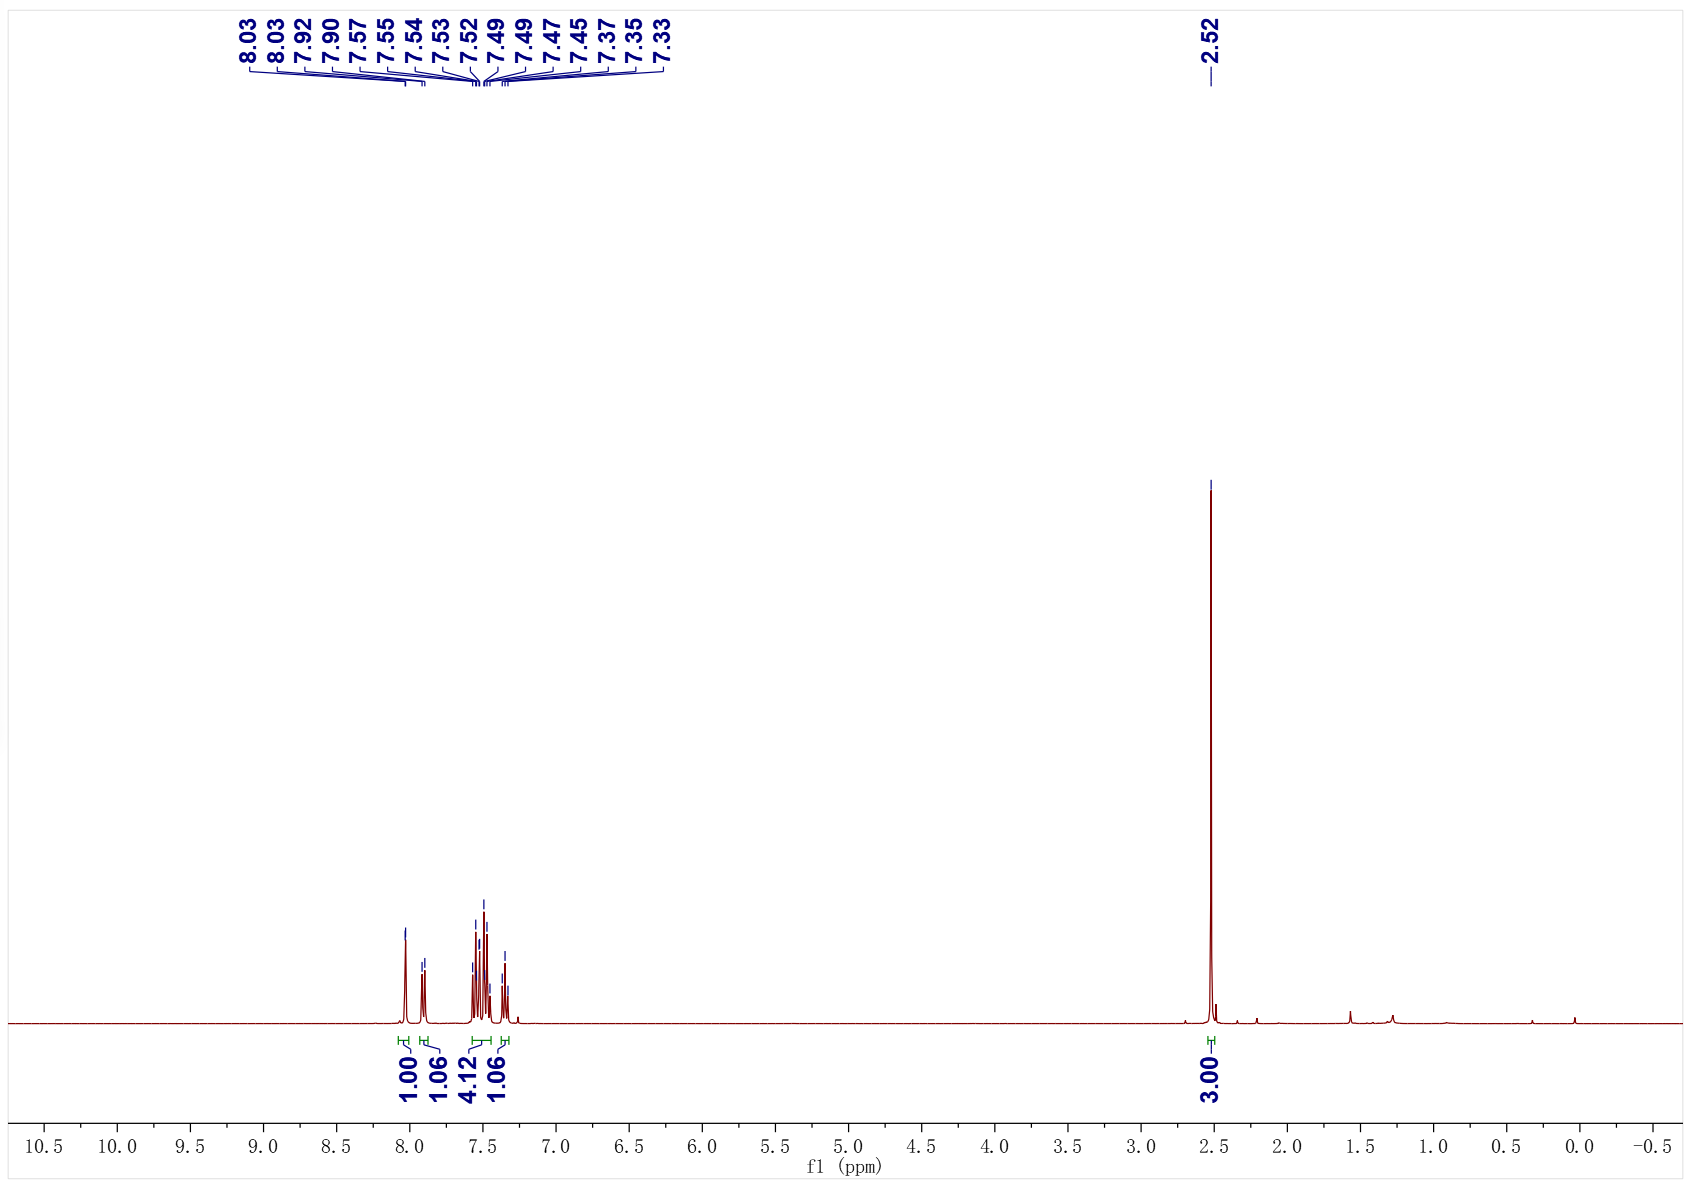

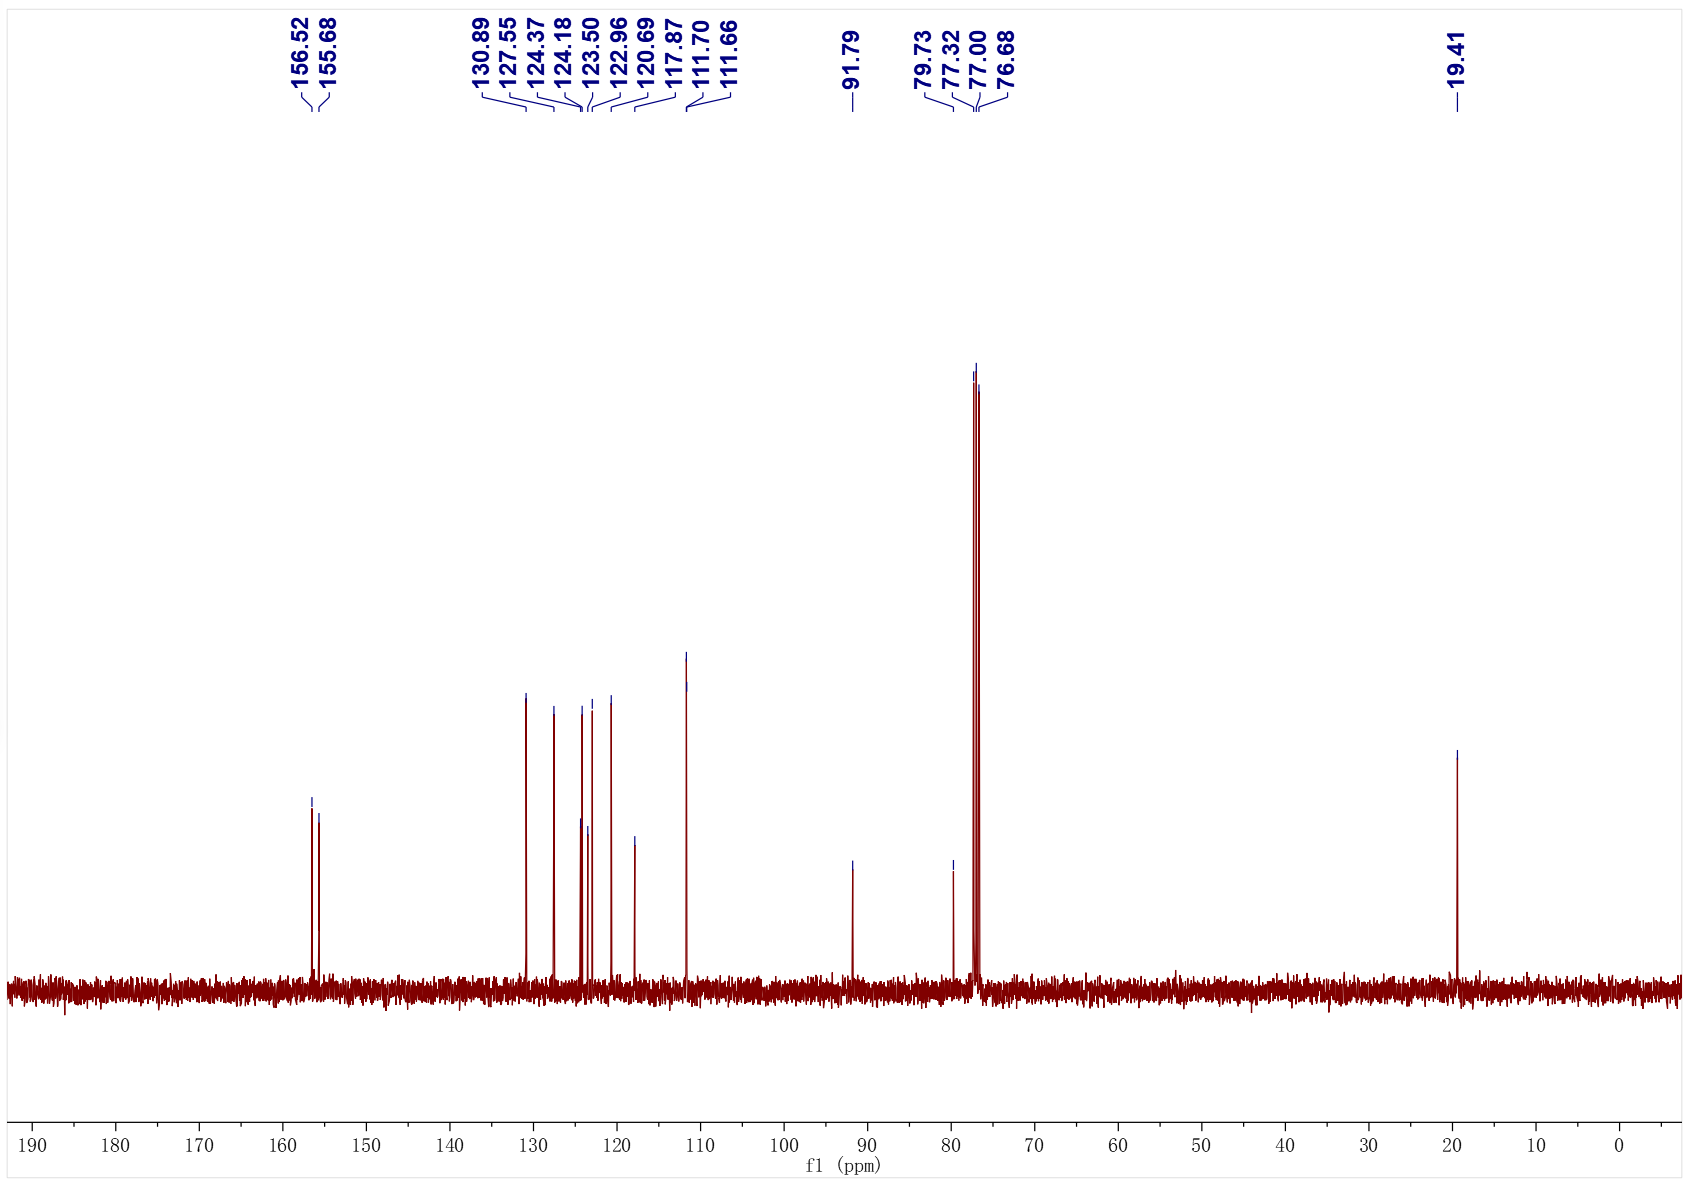


**1ak; 1H NMR (500 MHz, CDCl3); 13C NMR (126 MHz, CDCl3)**


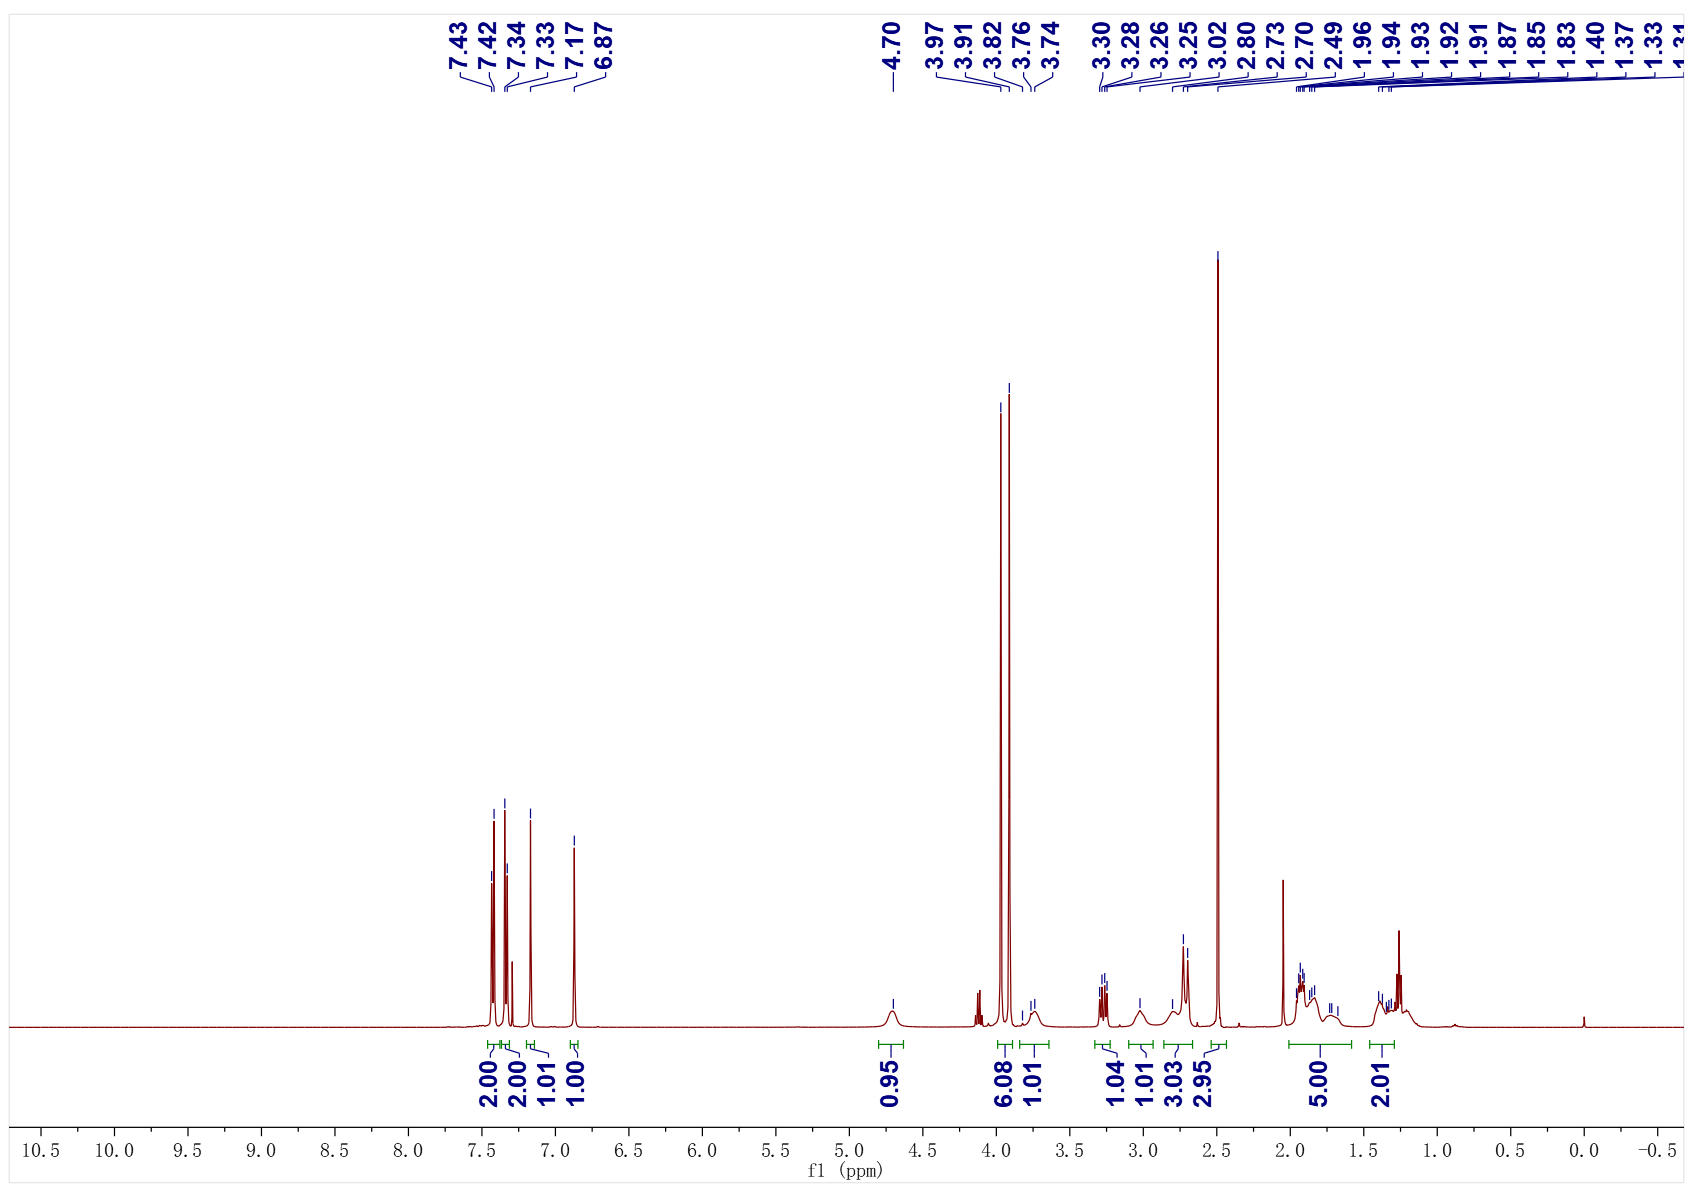


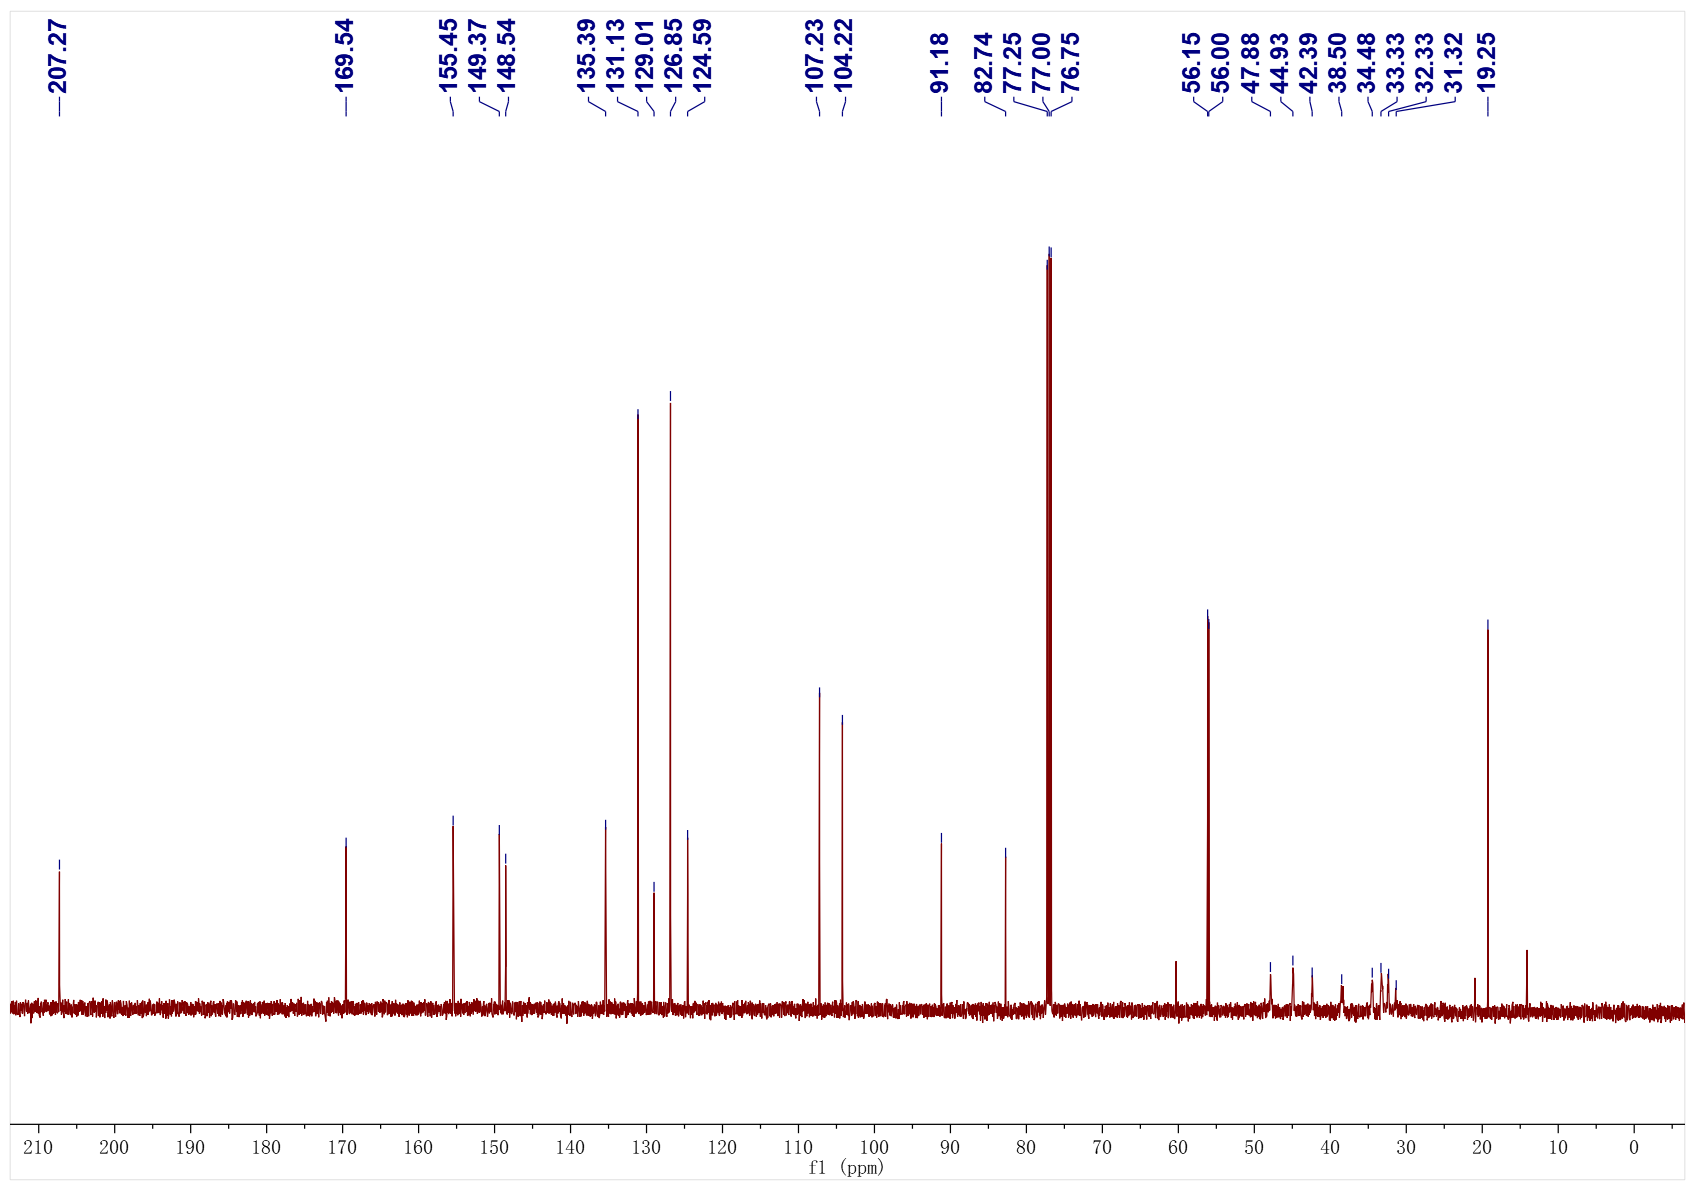


**1al; 1H NMR (500 MHz, CDCl3); 13C NMR (126 MHz, CDCl3)**


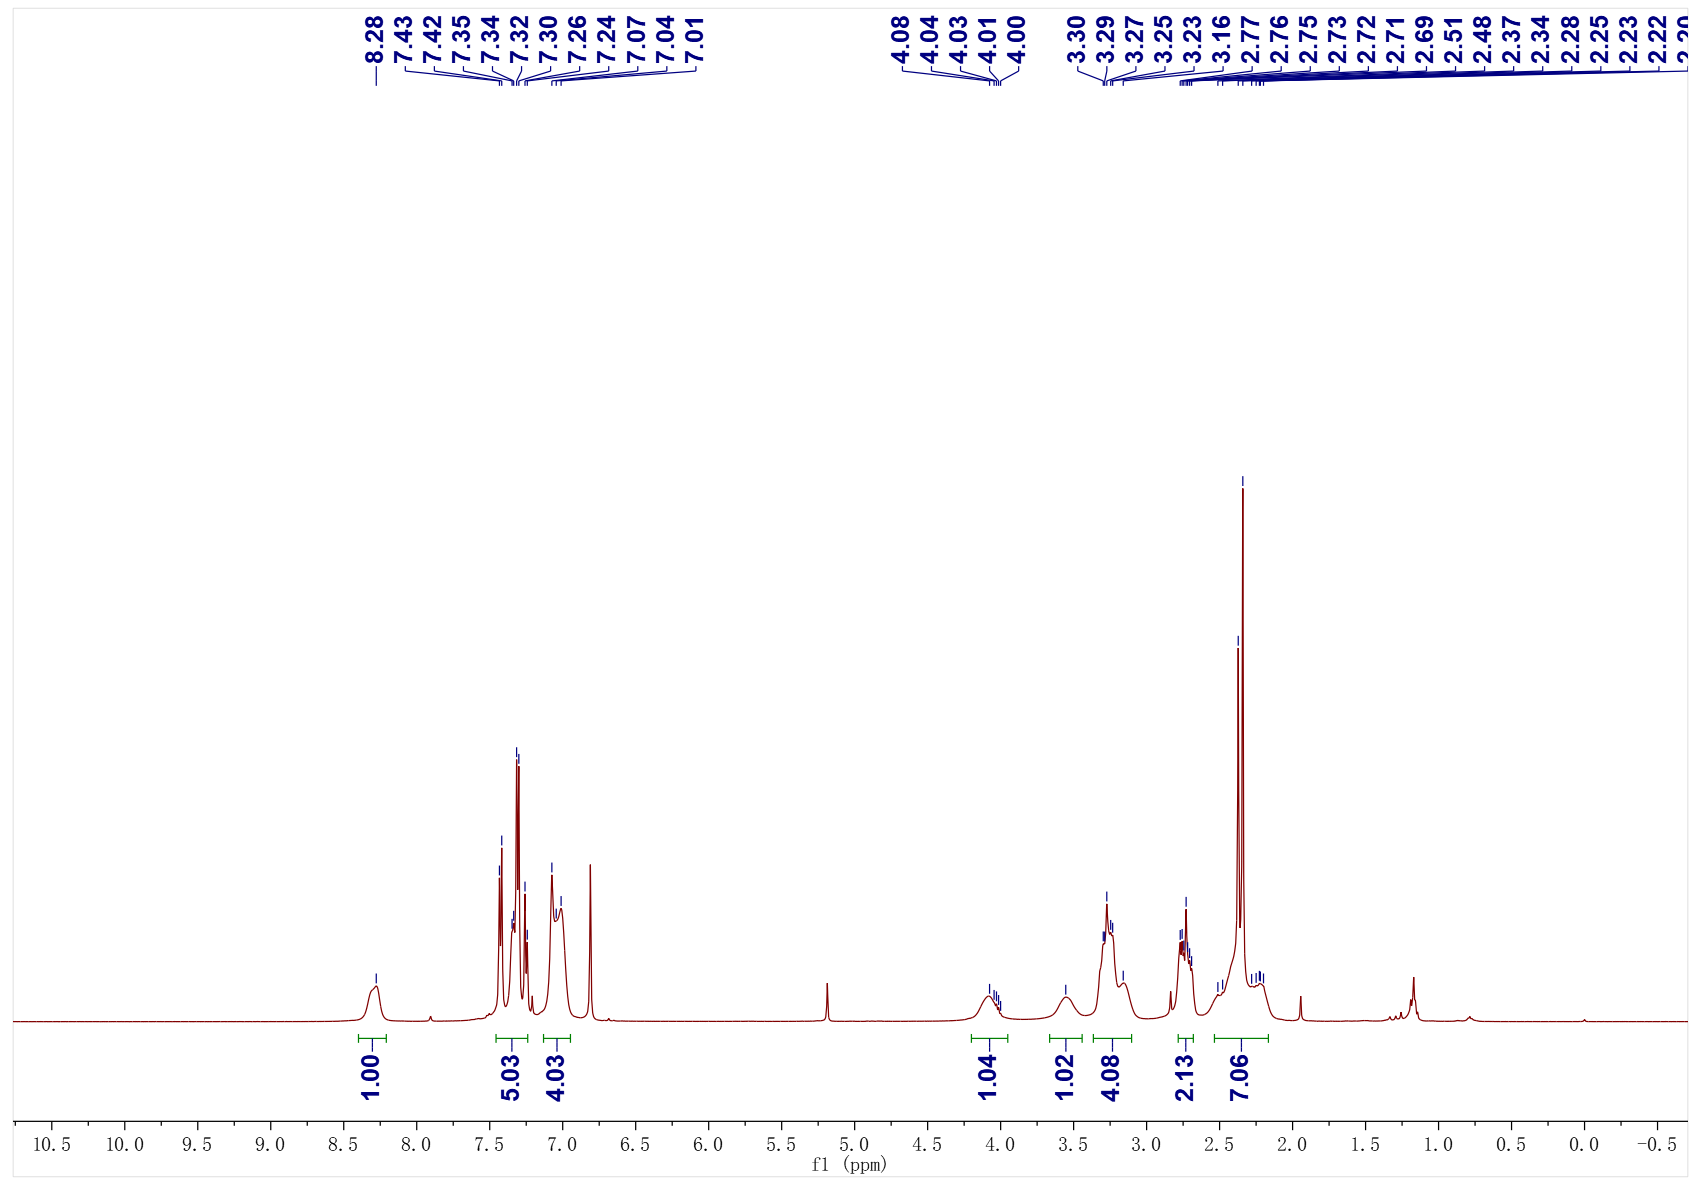


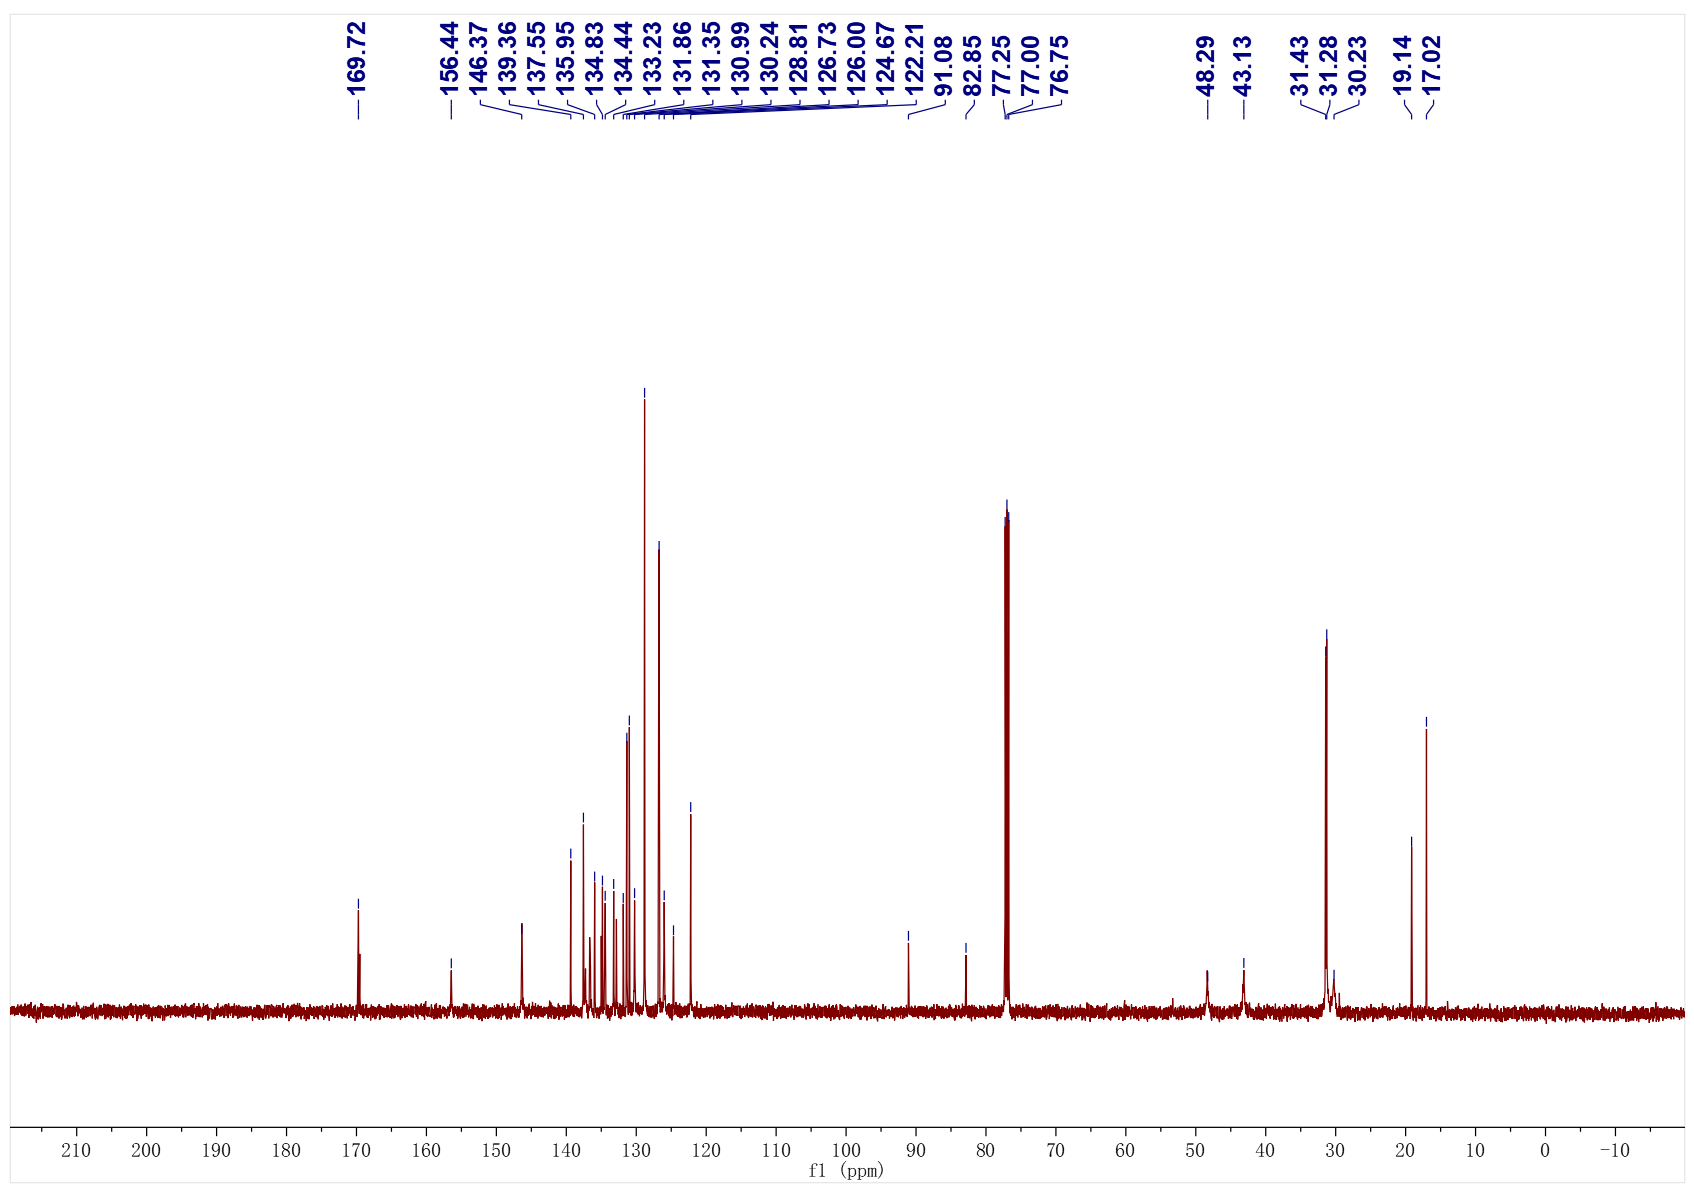


**1ao; 1H NMR (500 MHz, CDCl3); 13C NMR (126 MHz, CDCl3)**


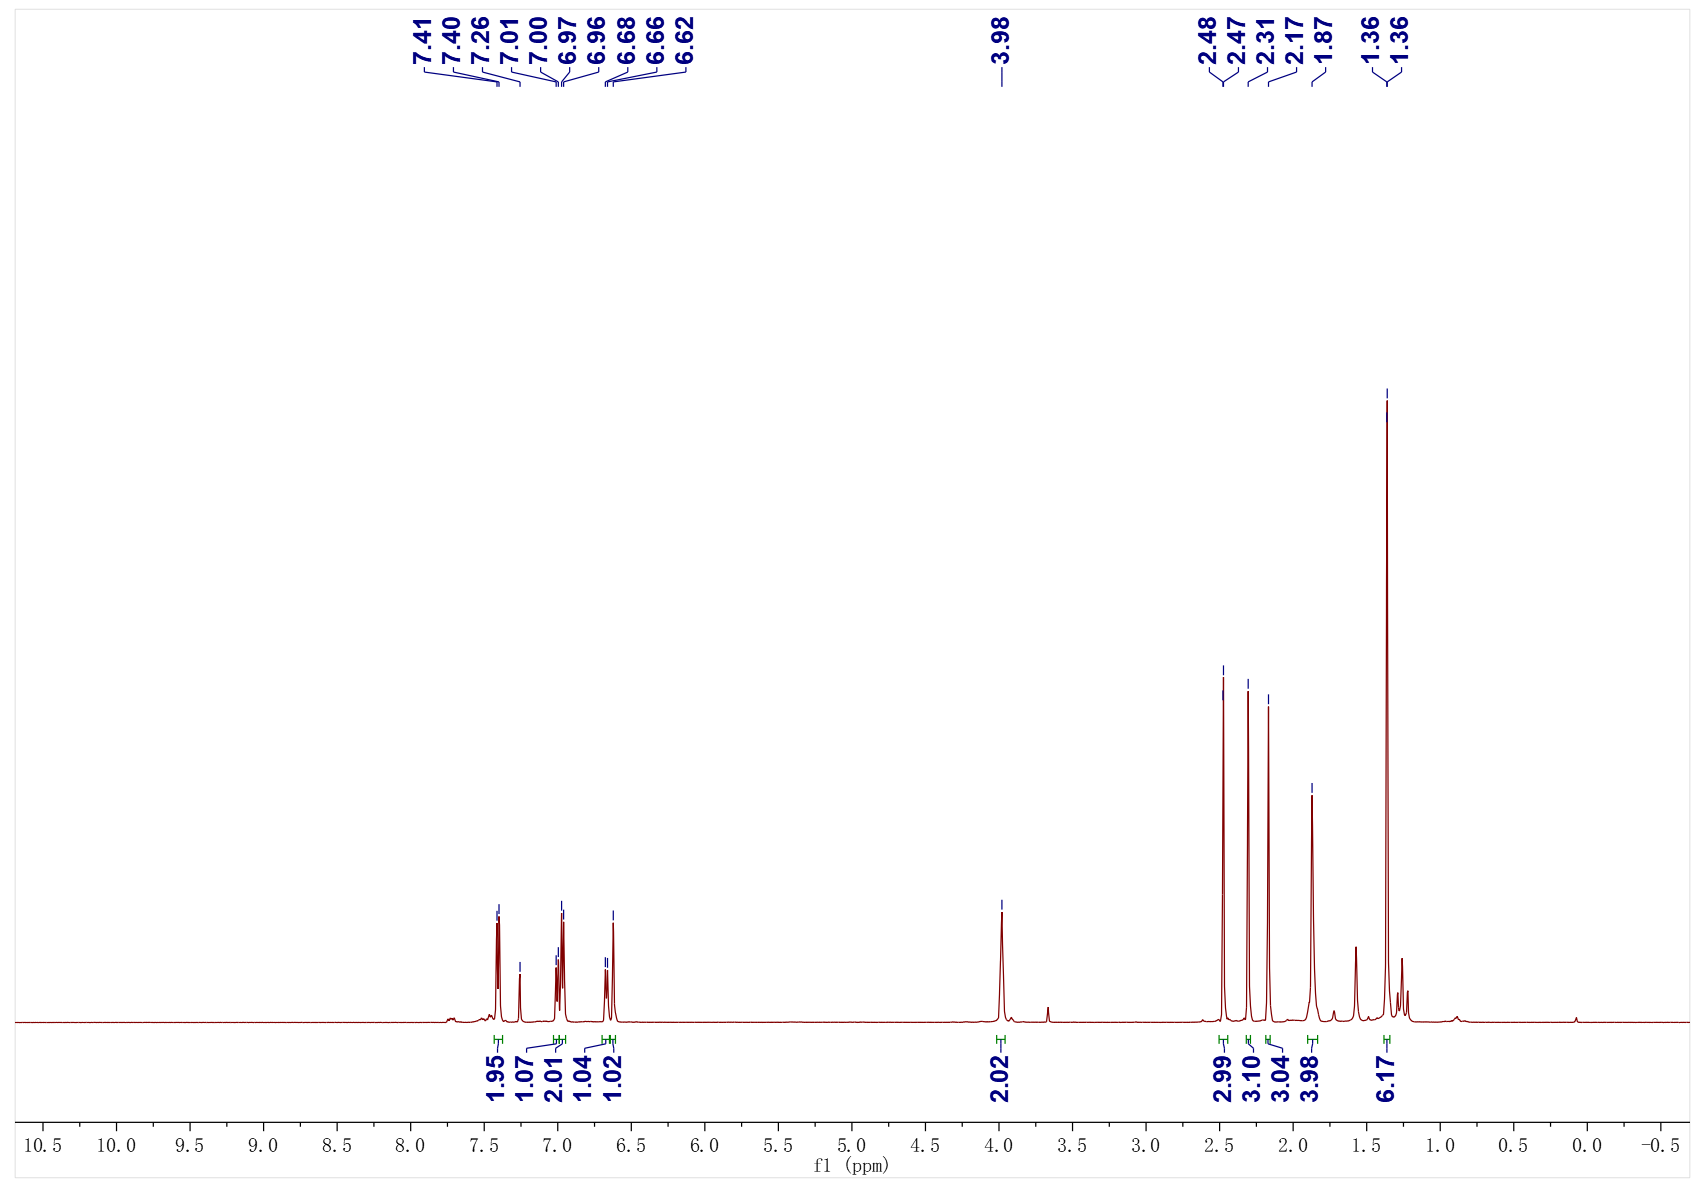


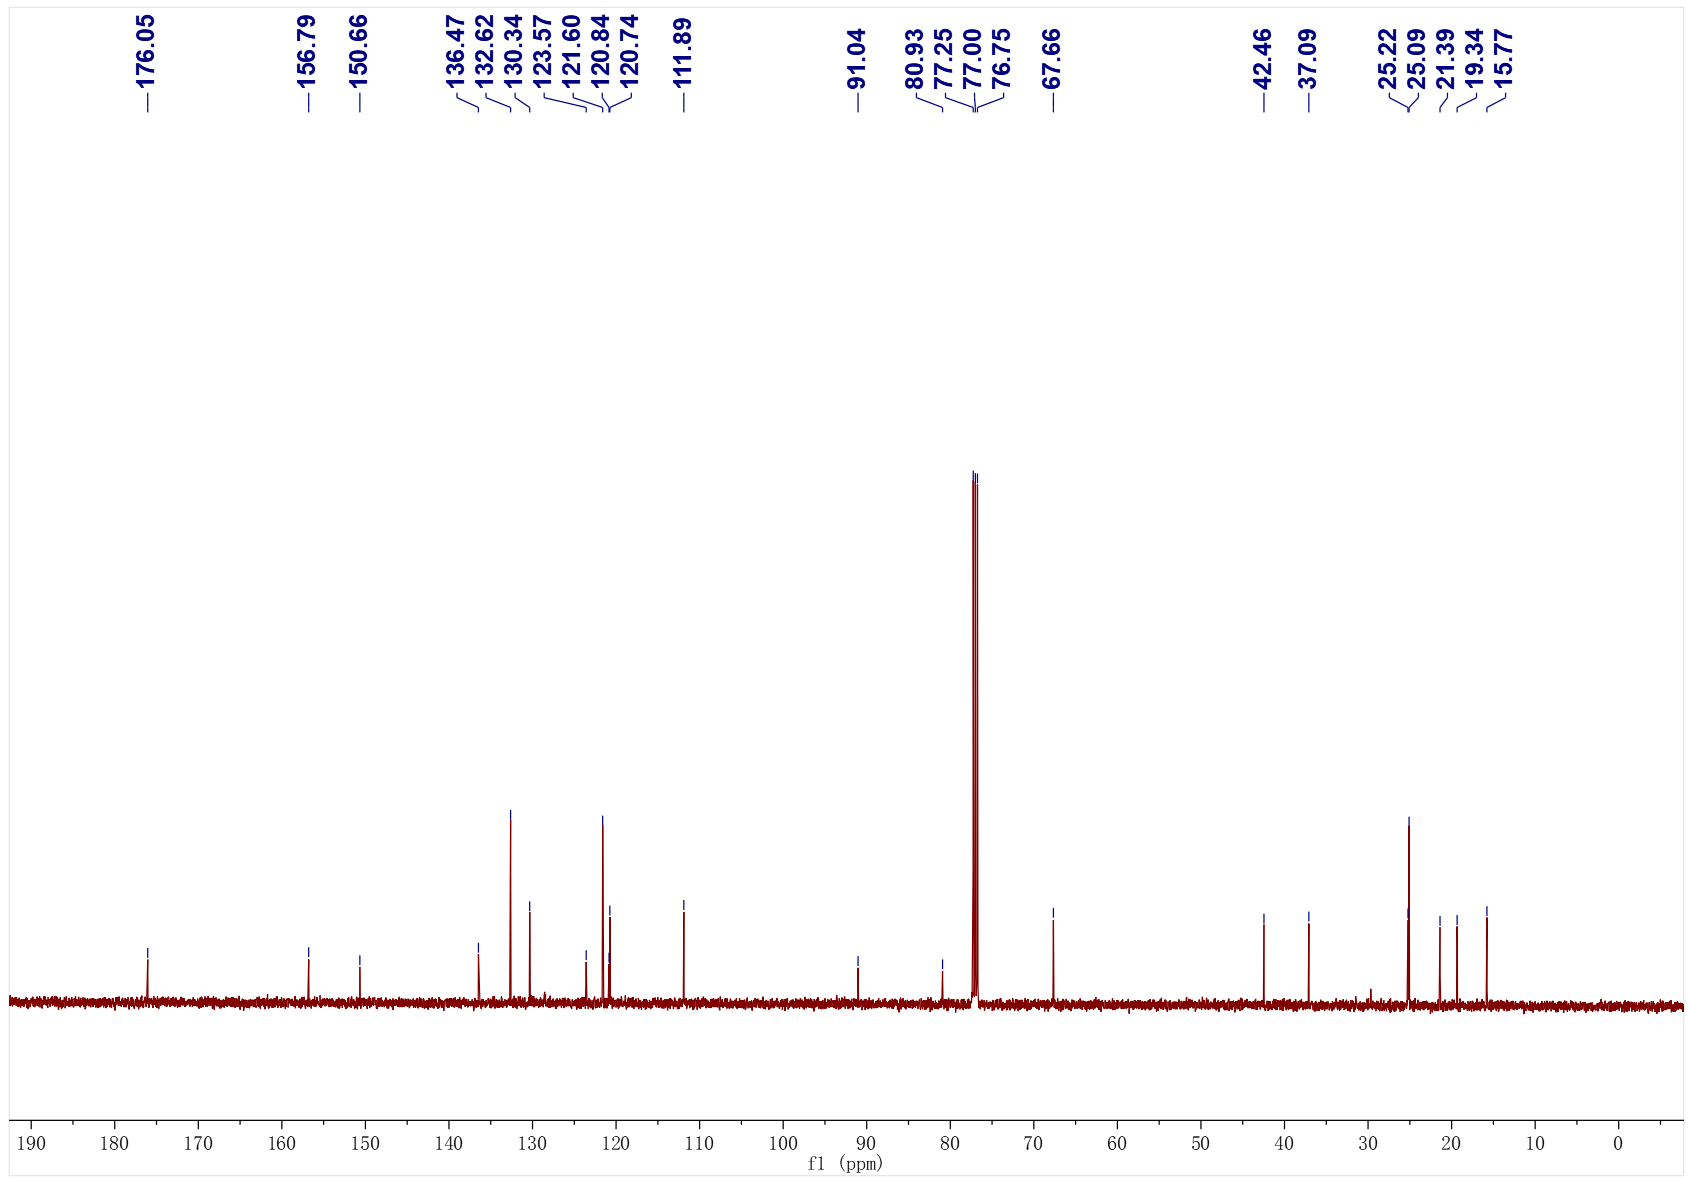


**1ap; 1H NMR (500 MHz, CDCl3); 13C NMR (126 MHz, CDCl3)**


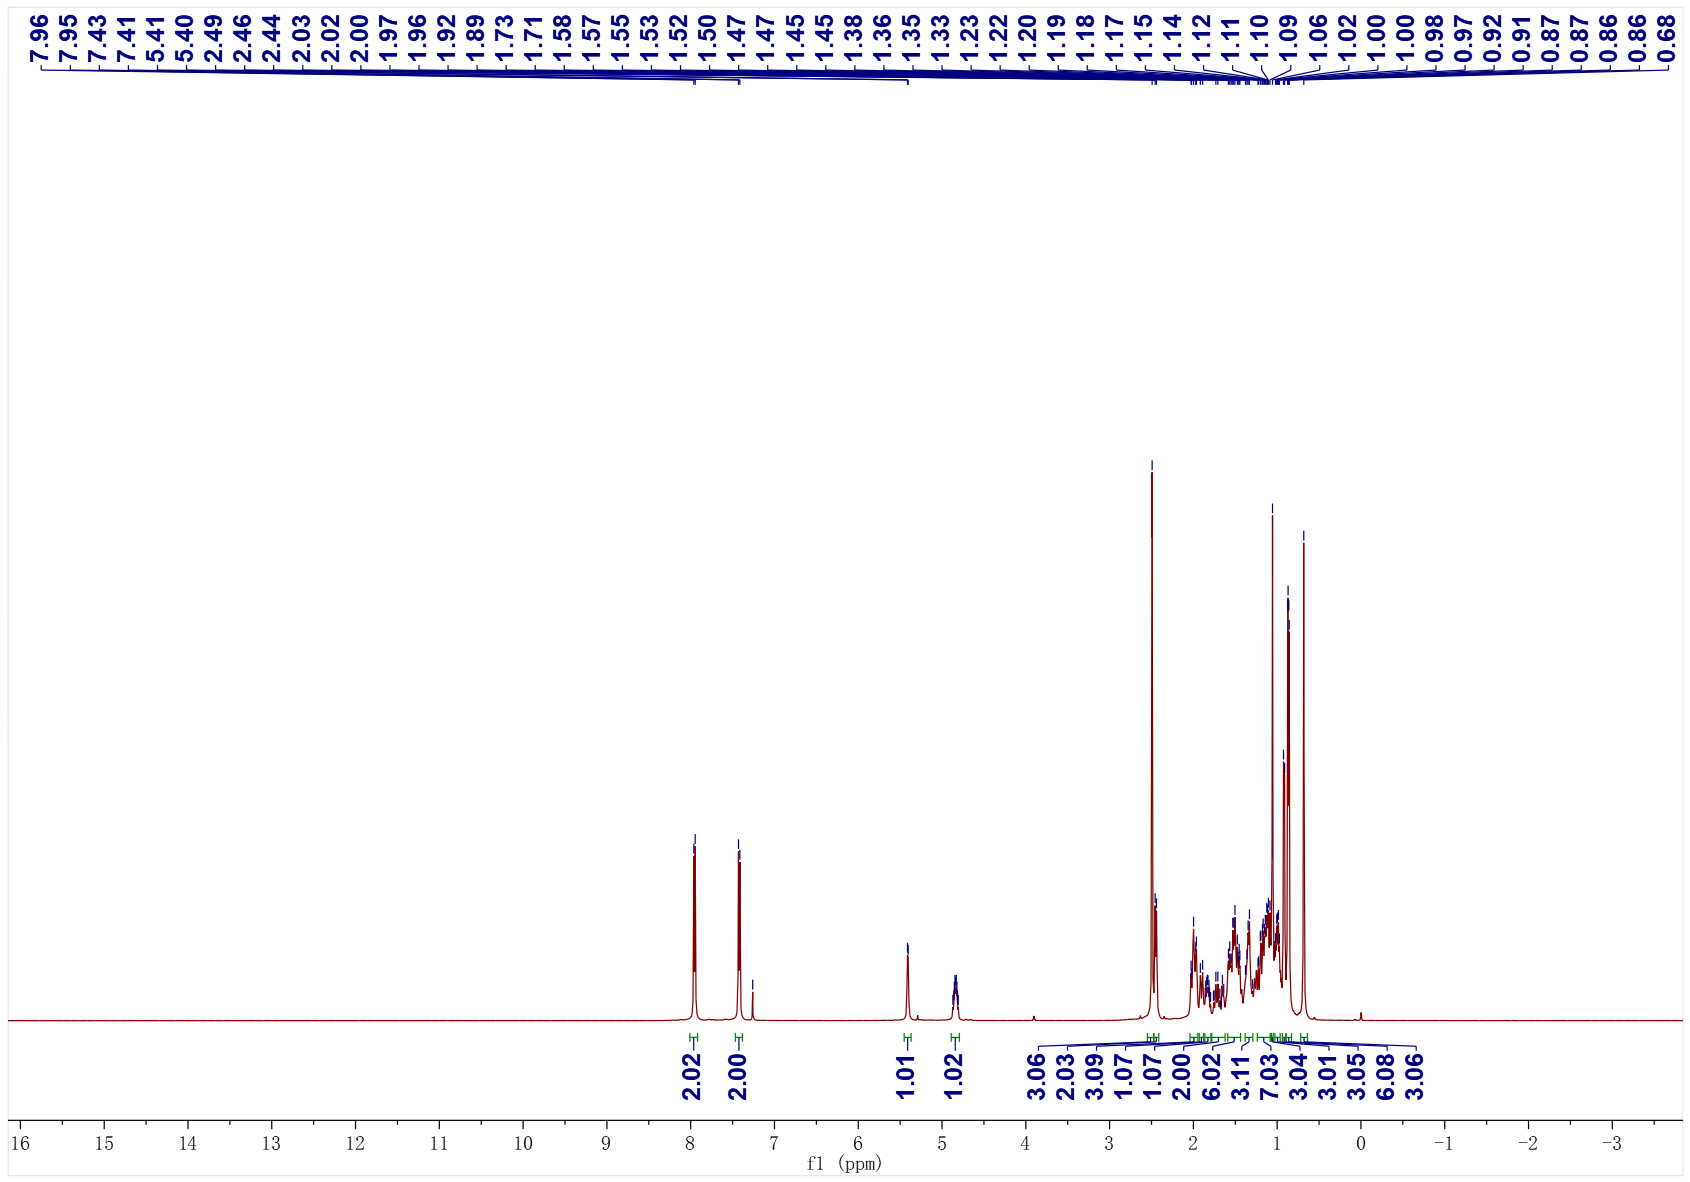

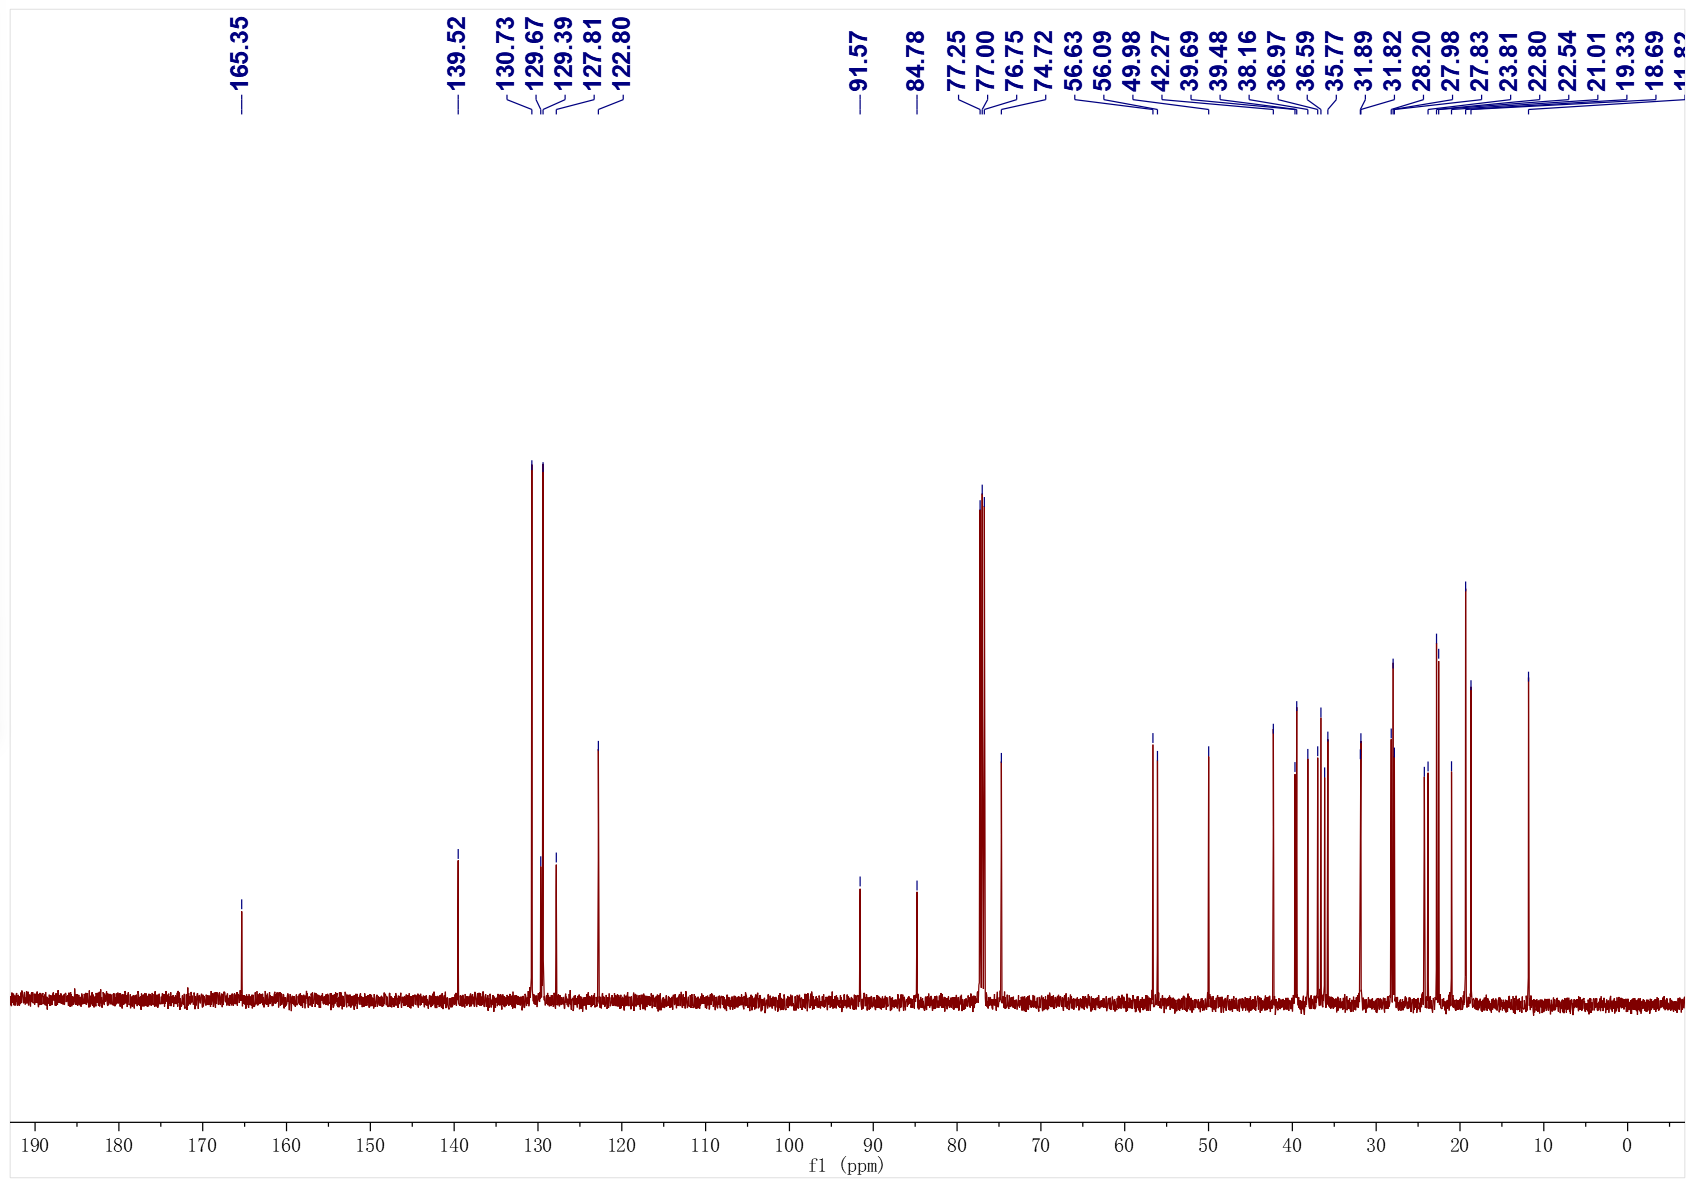


**1as; 1H NMR (500 MHz, CDCl3); 13C NMR (126 MHz, CDCl3)**


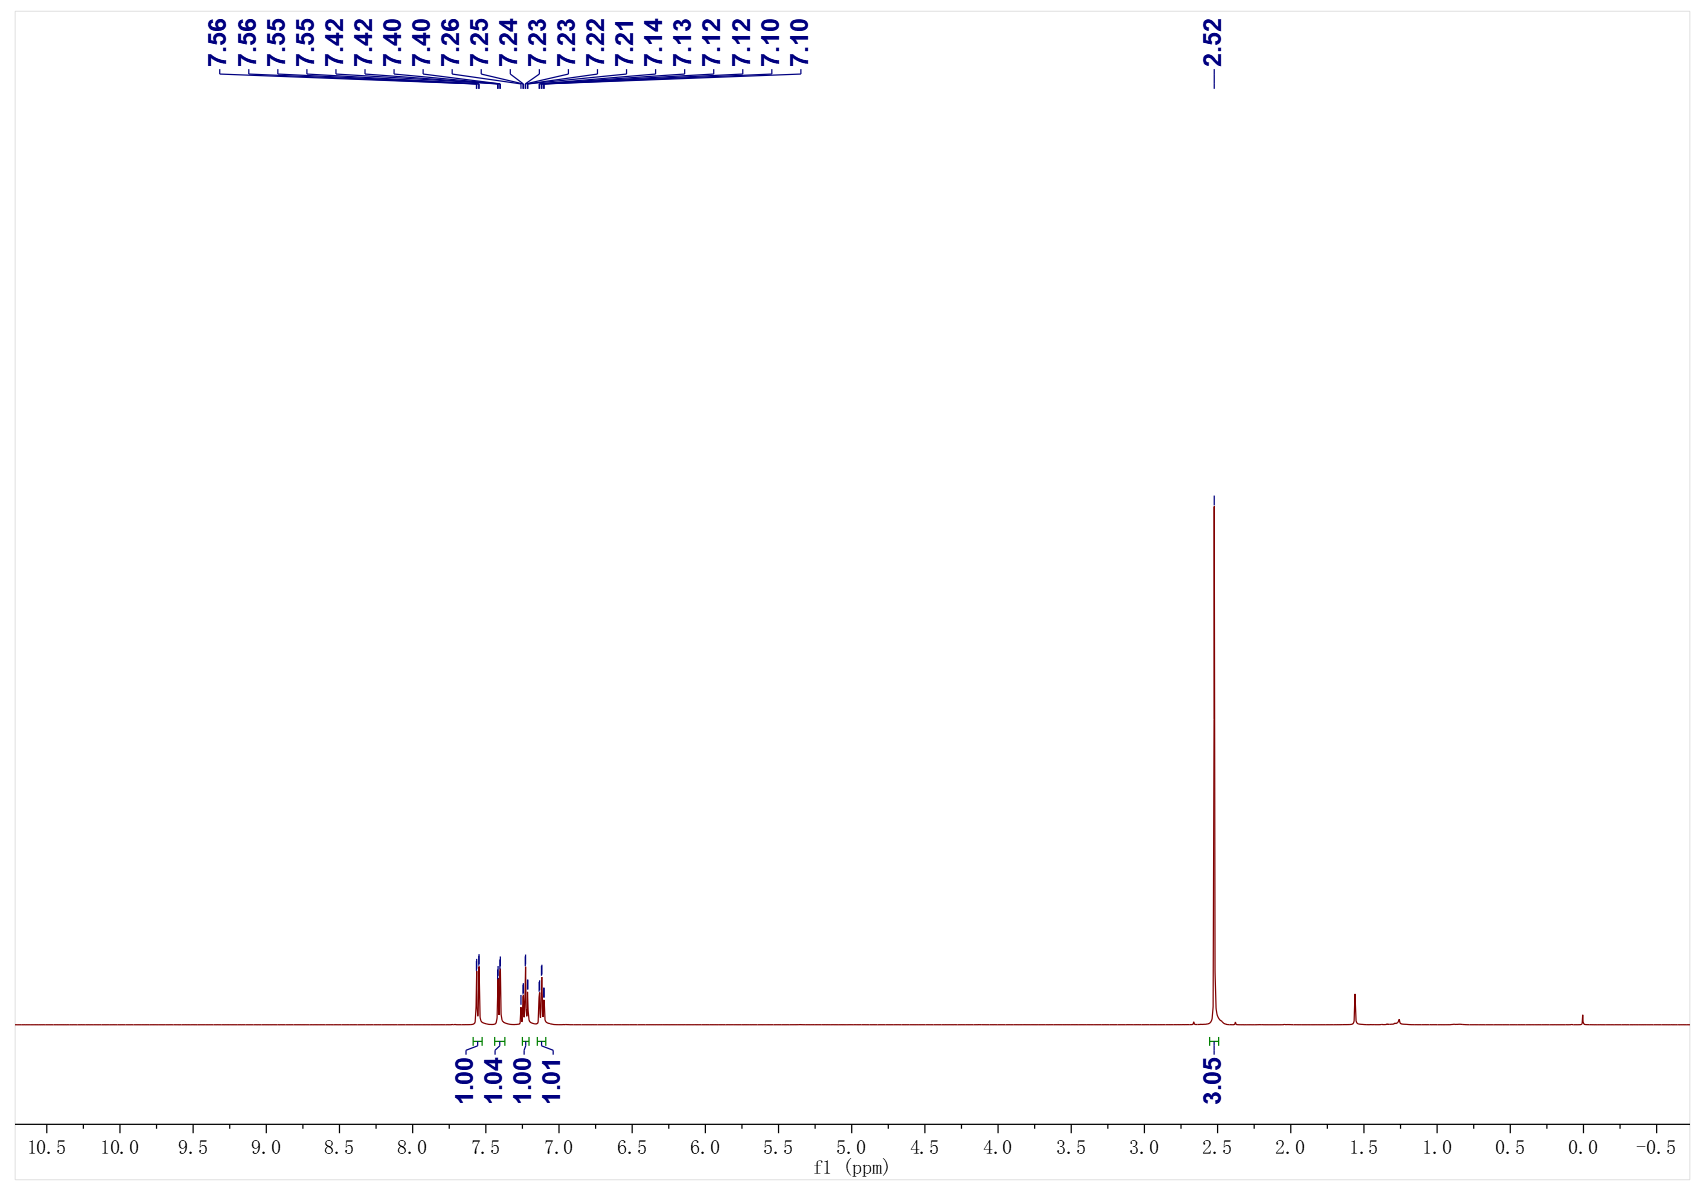


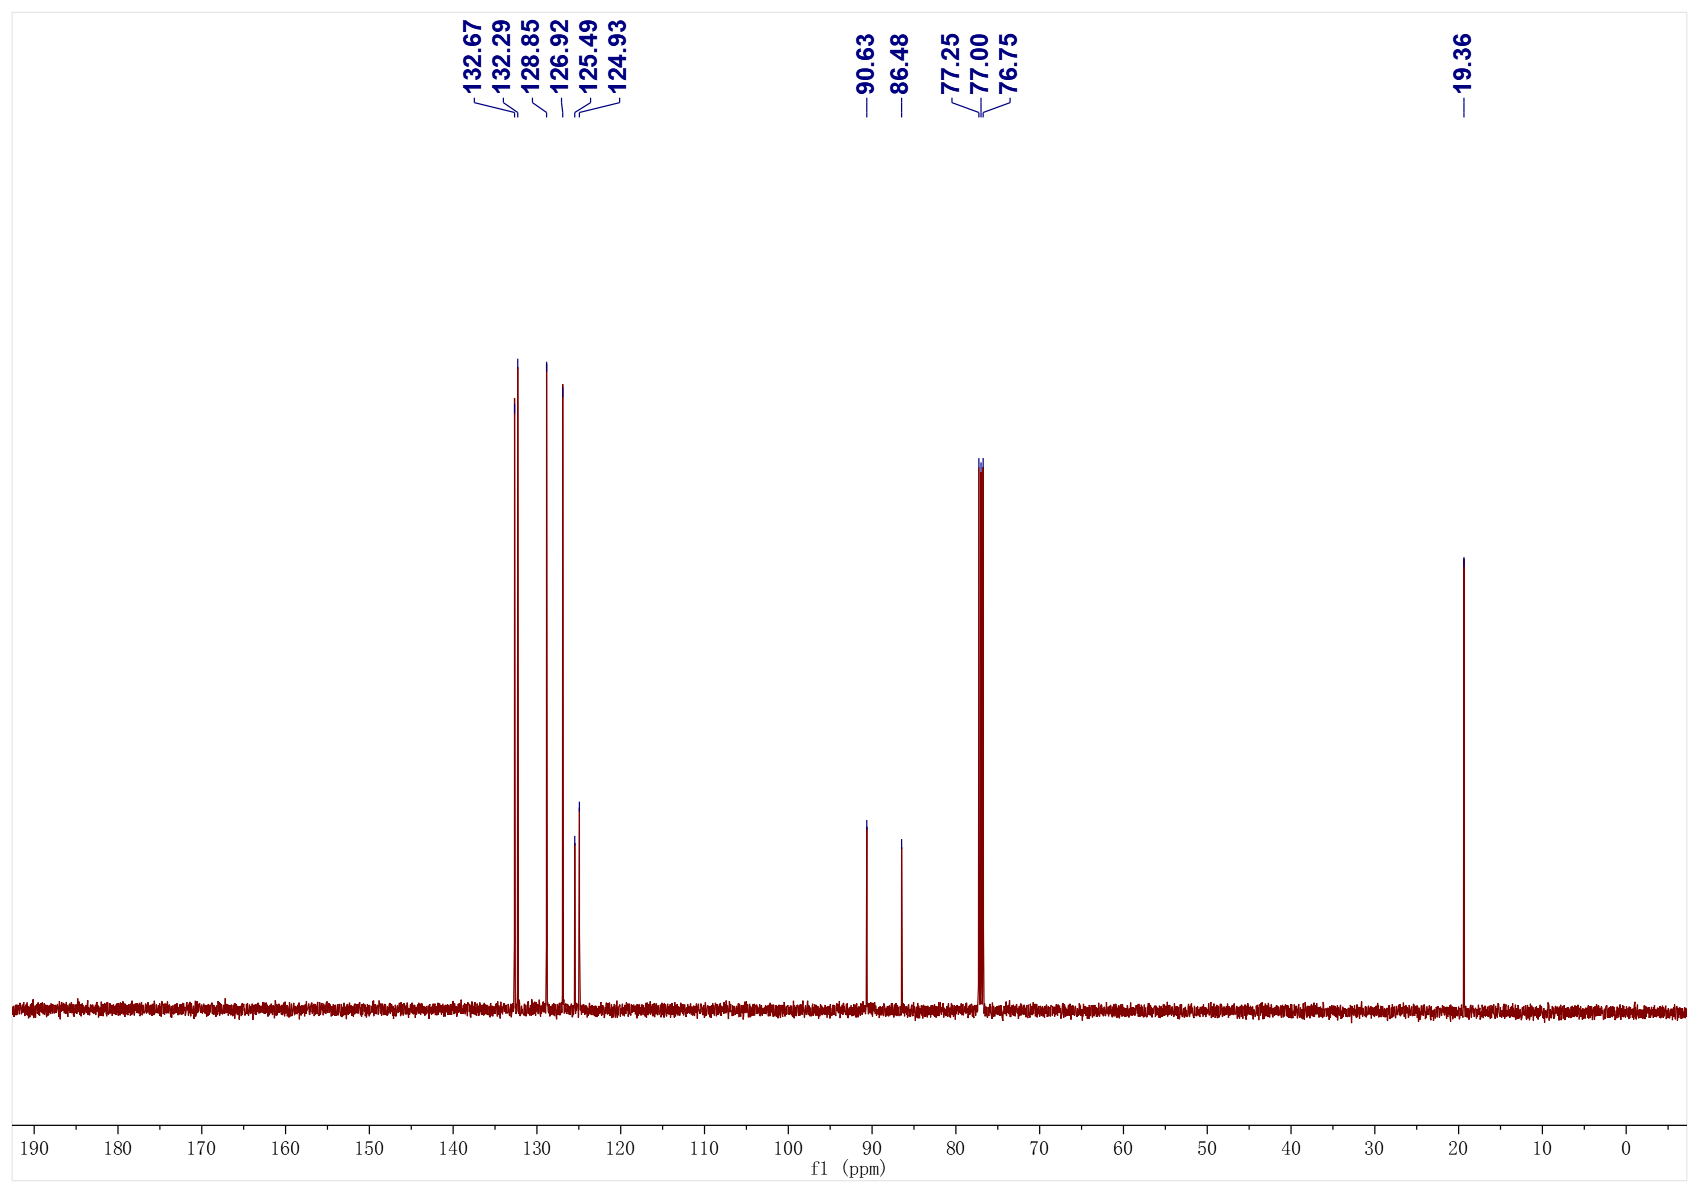


**1au; 1H NMR (400 MHz, CDCl3); 13C NMR (101 MHz, CDCl3)**


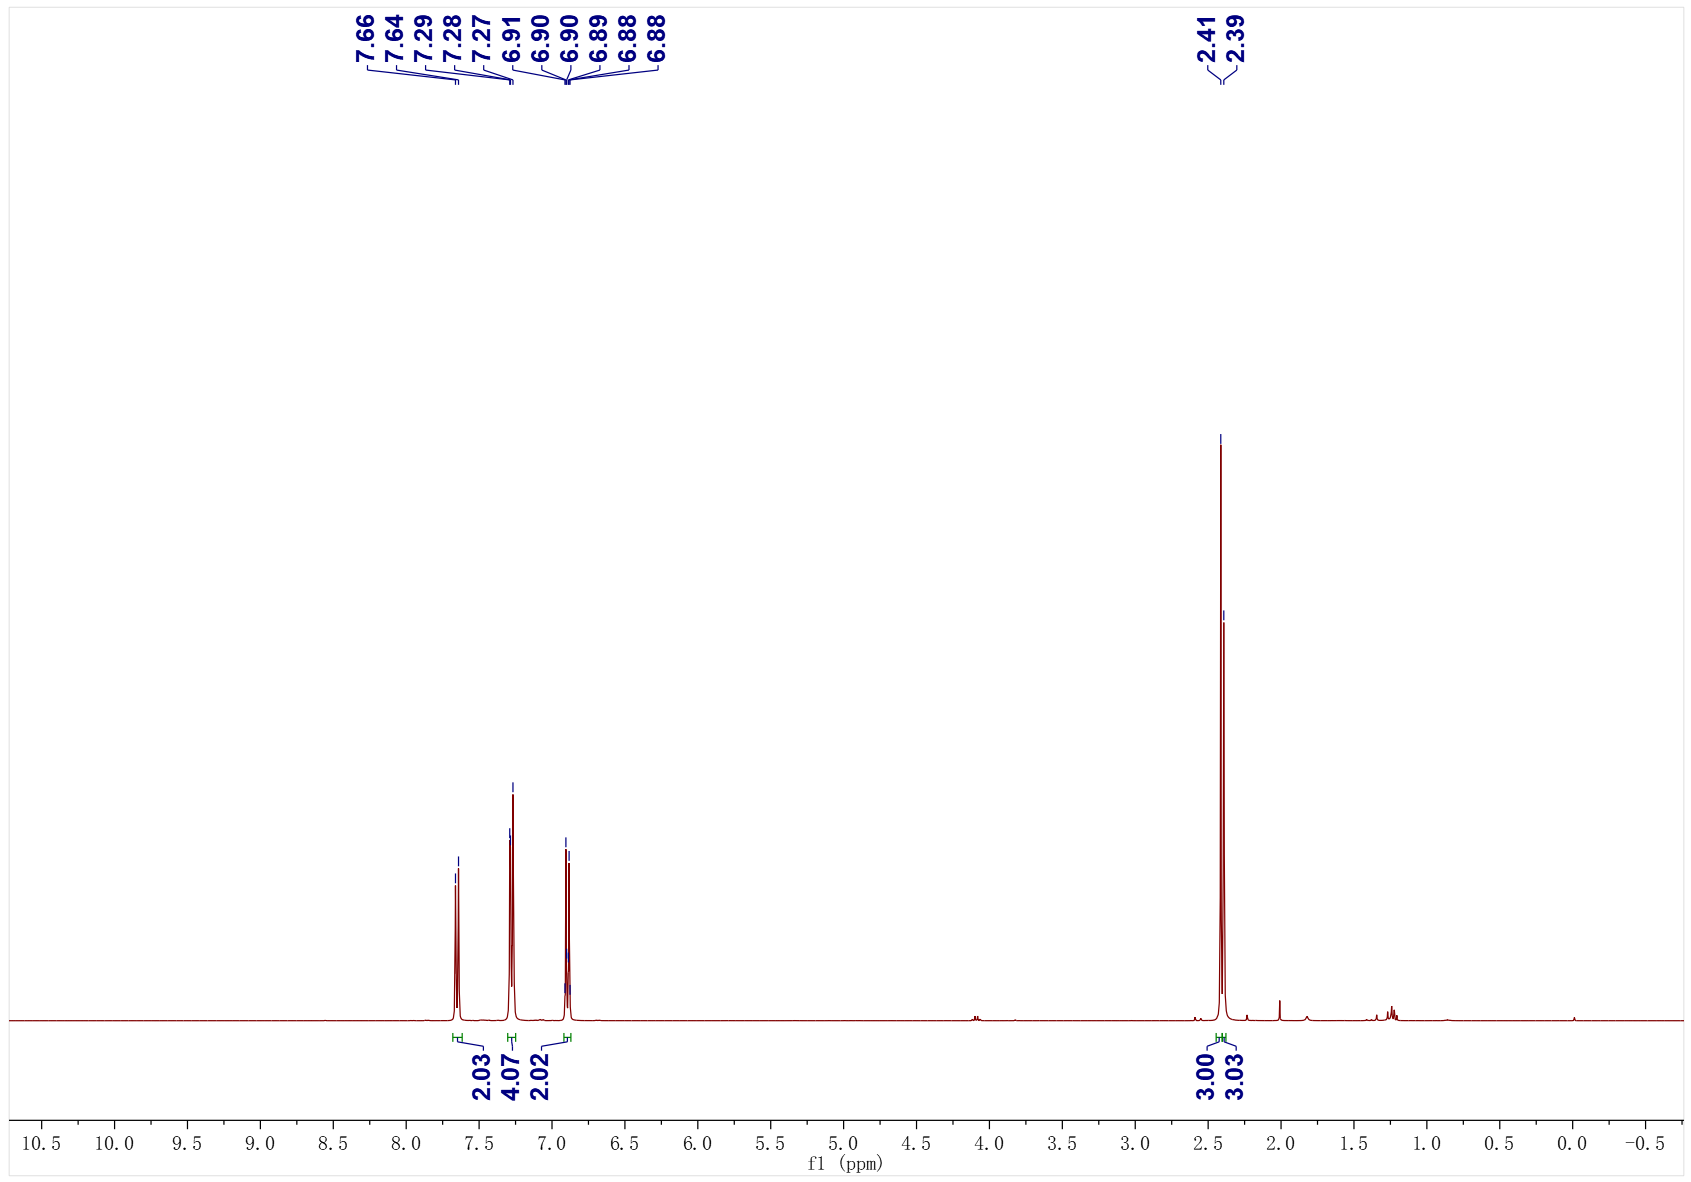


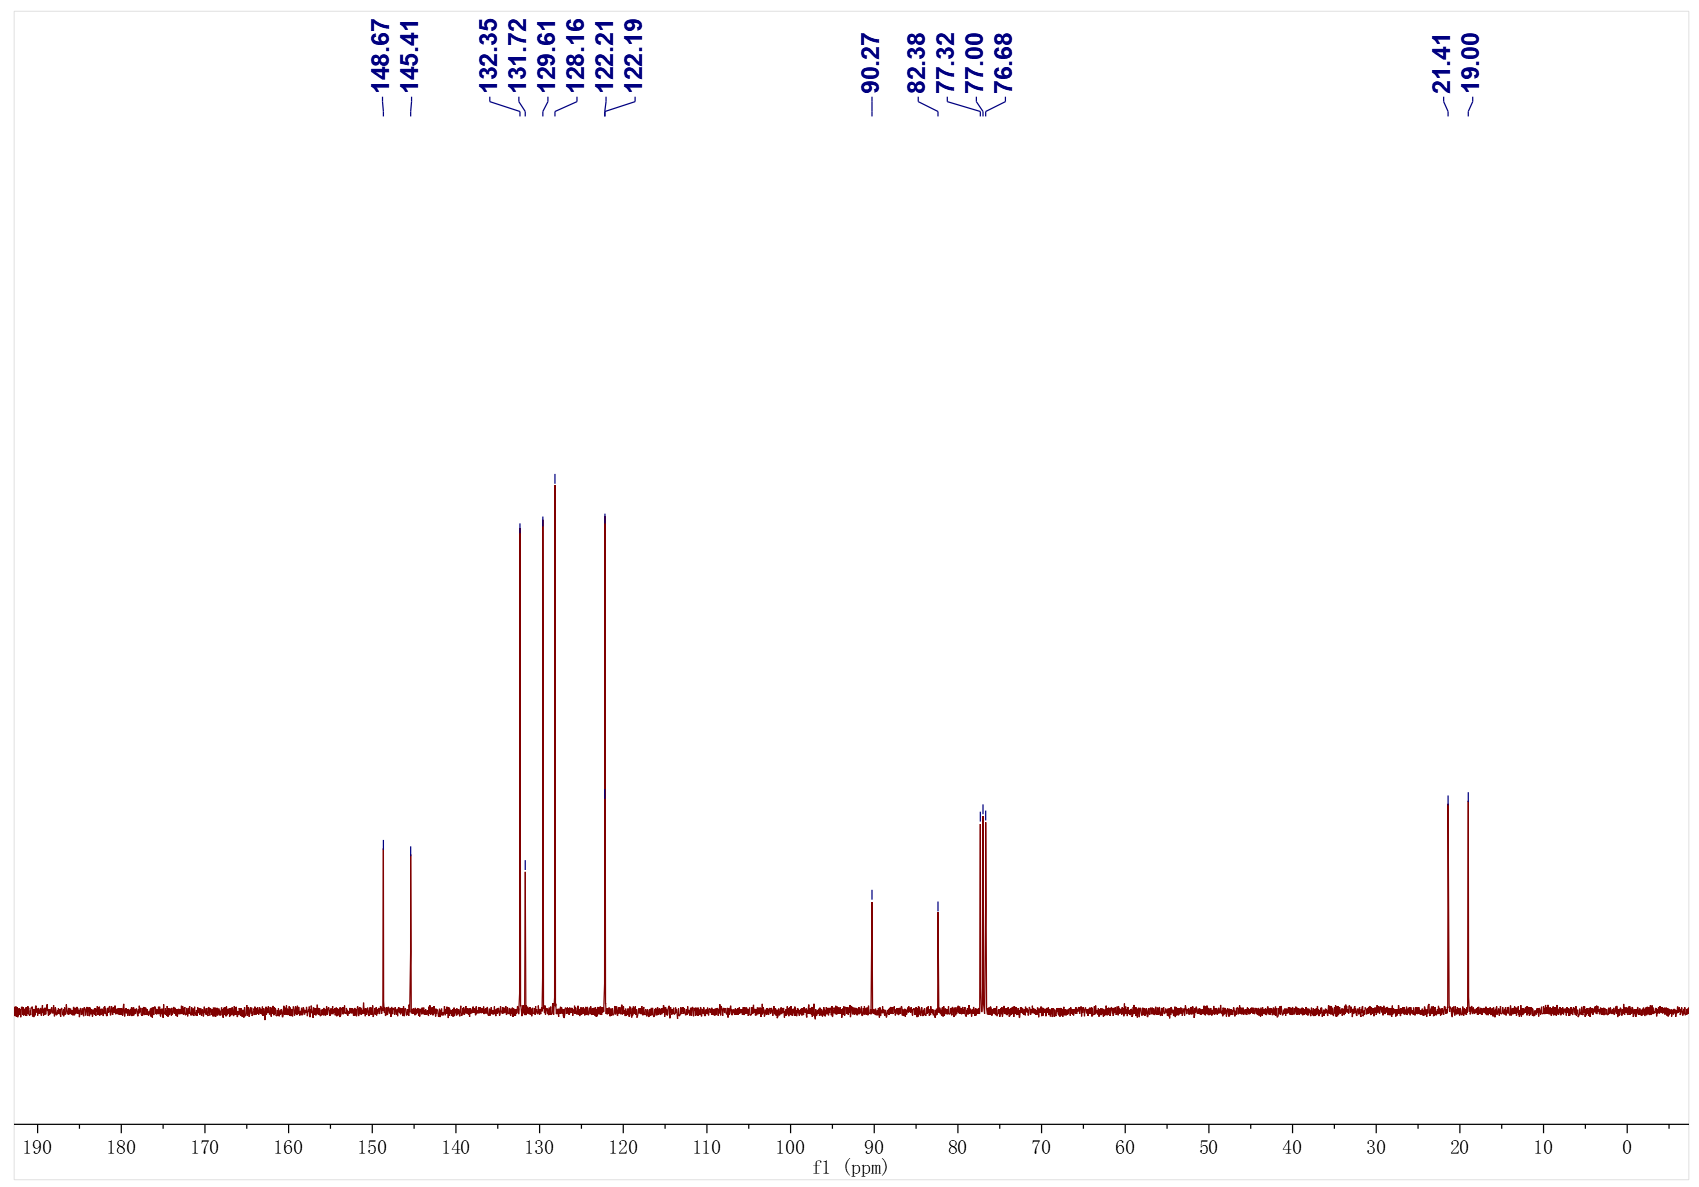


**1av; 1H NMR (400 MHz, CDCl3); 13C NMR (101 MHz, CDCl3)**


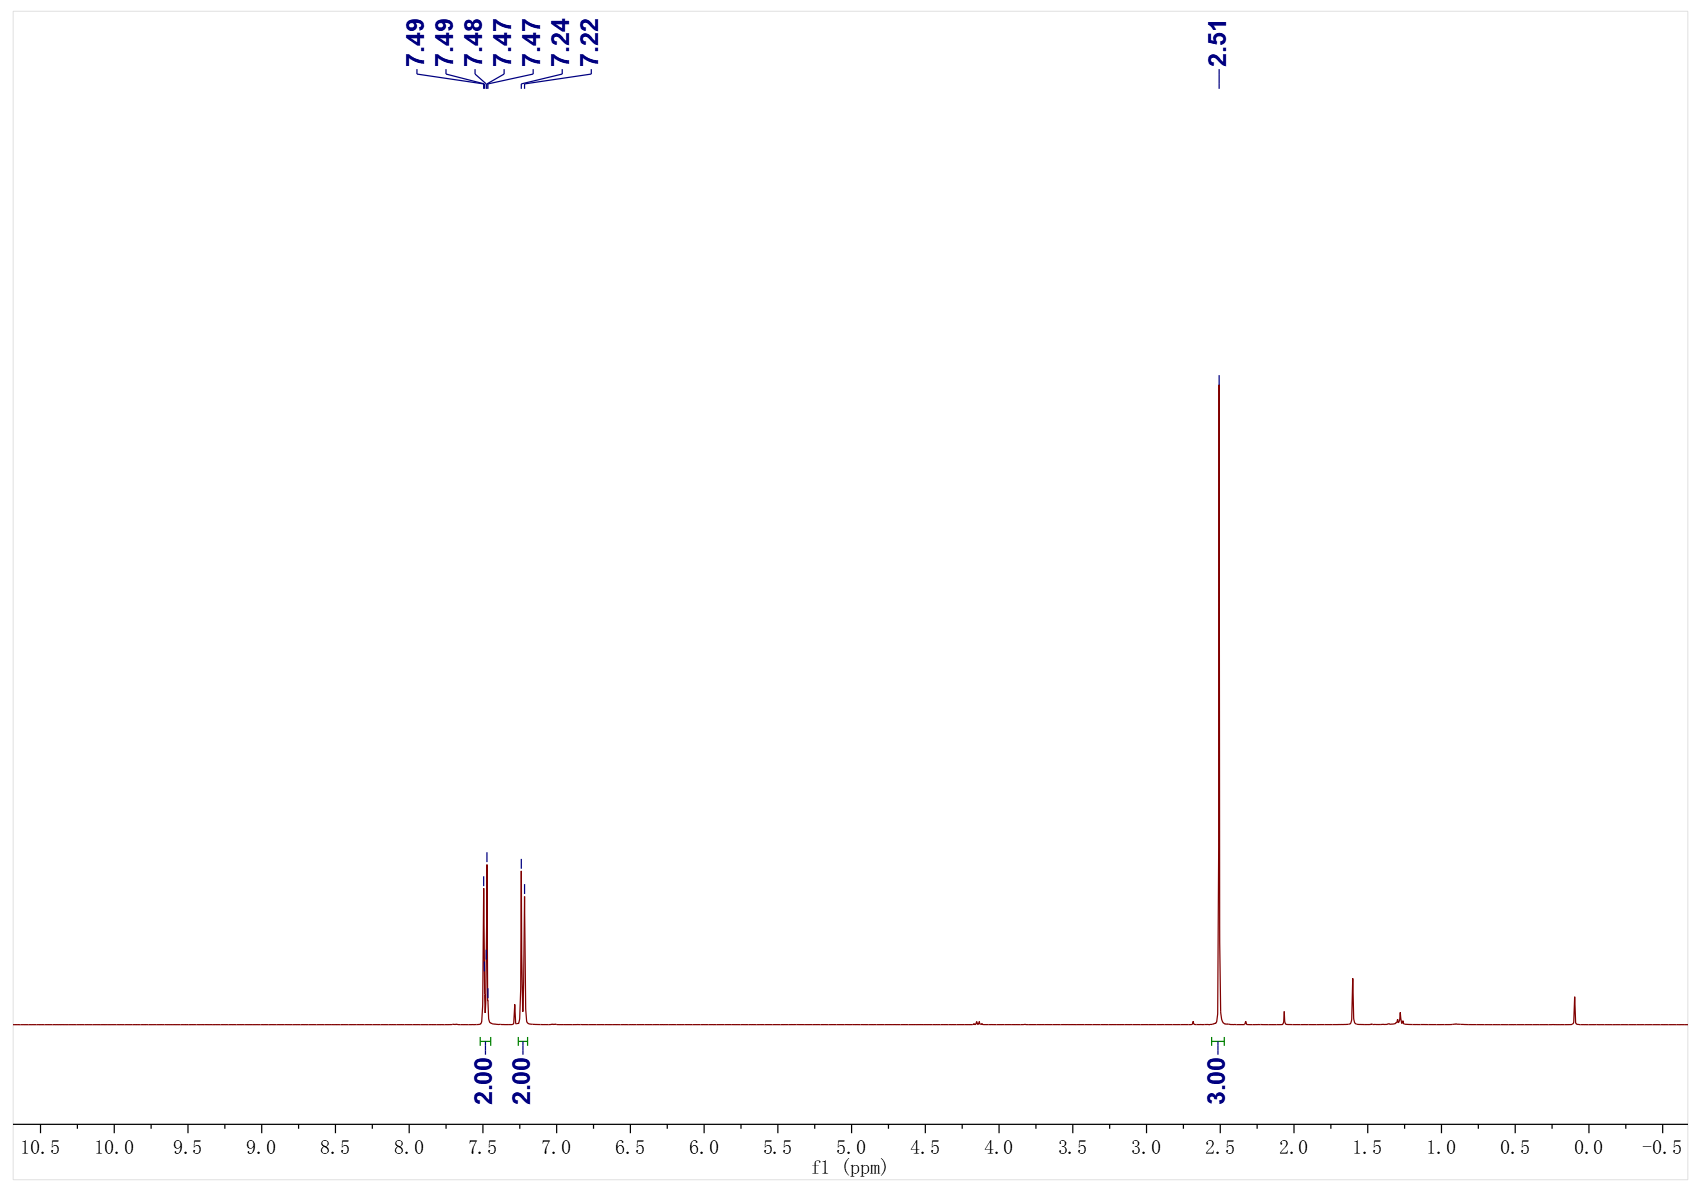


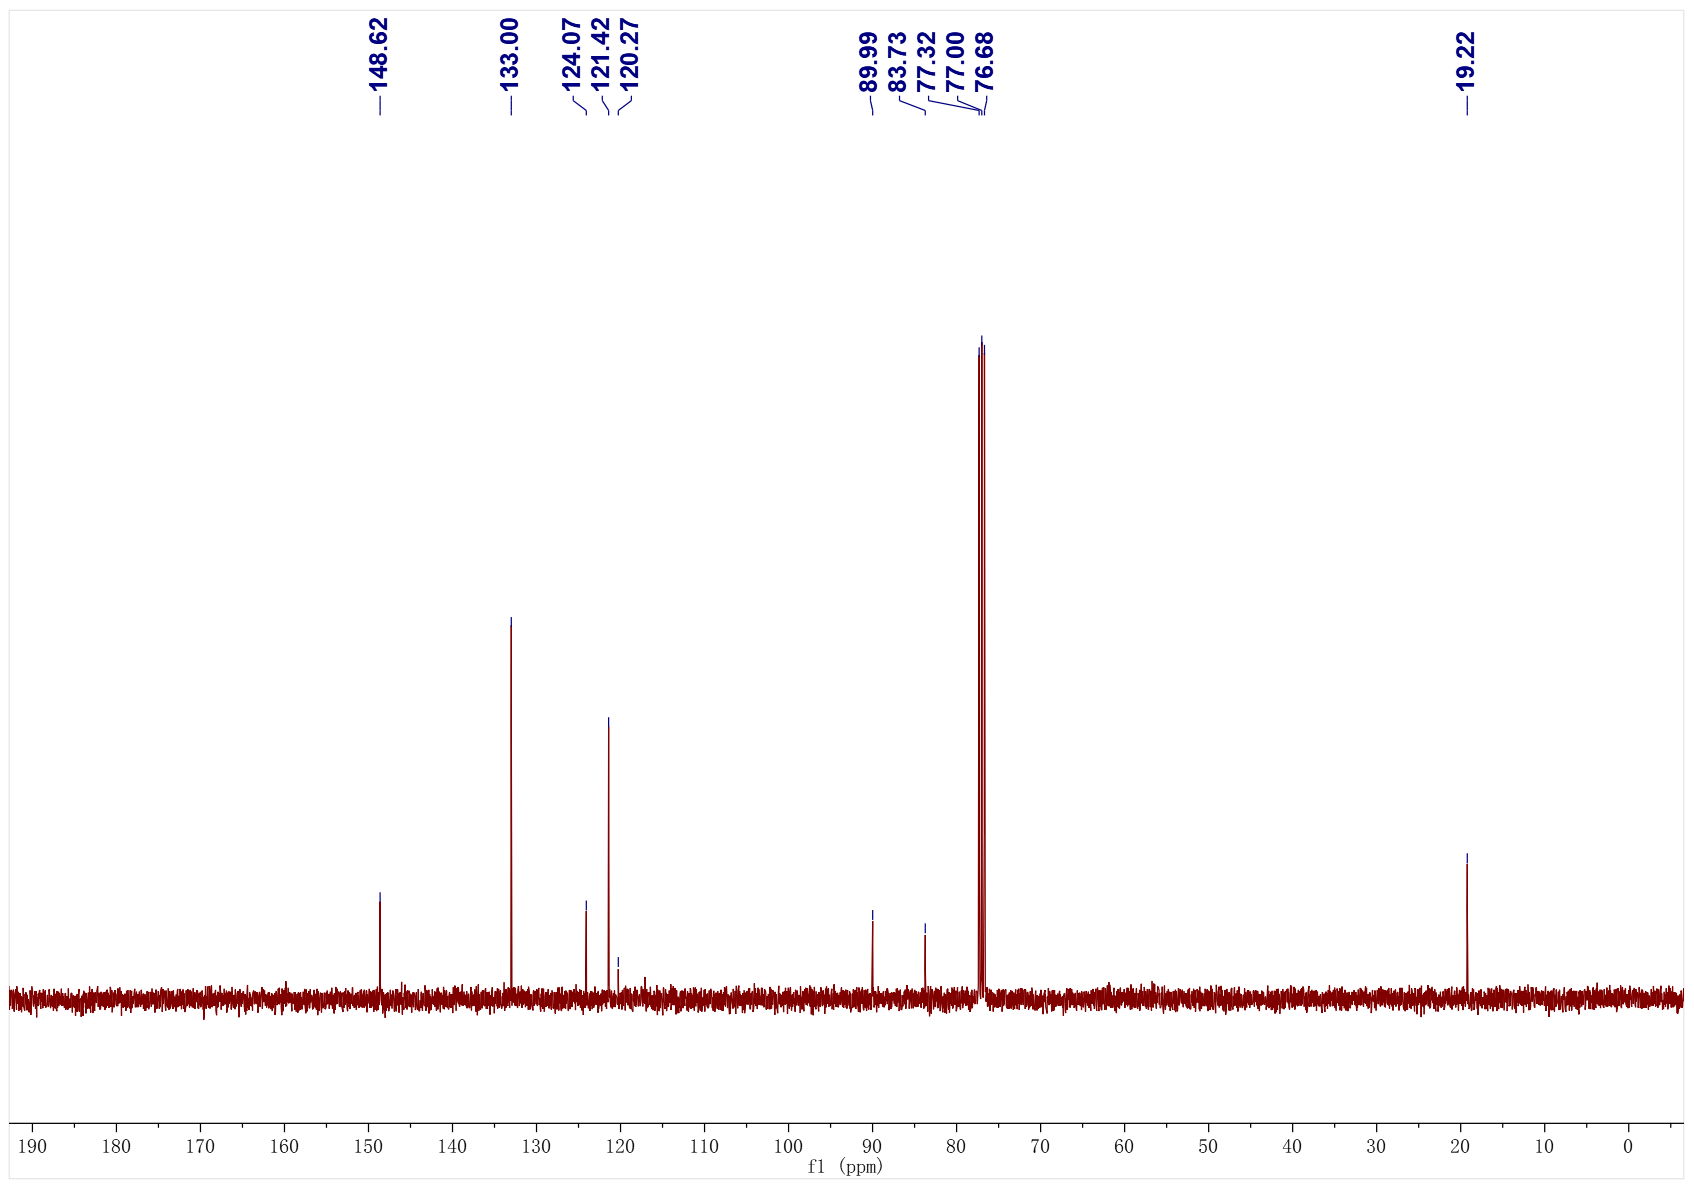


**1av; 19F NMR (376 MHz, CDCl3)**


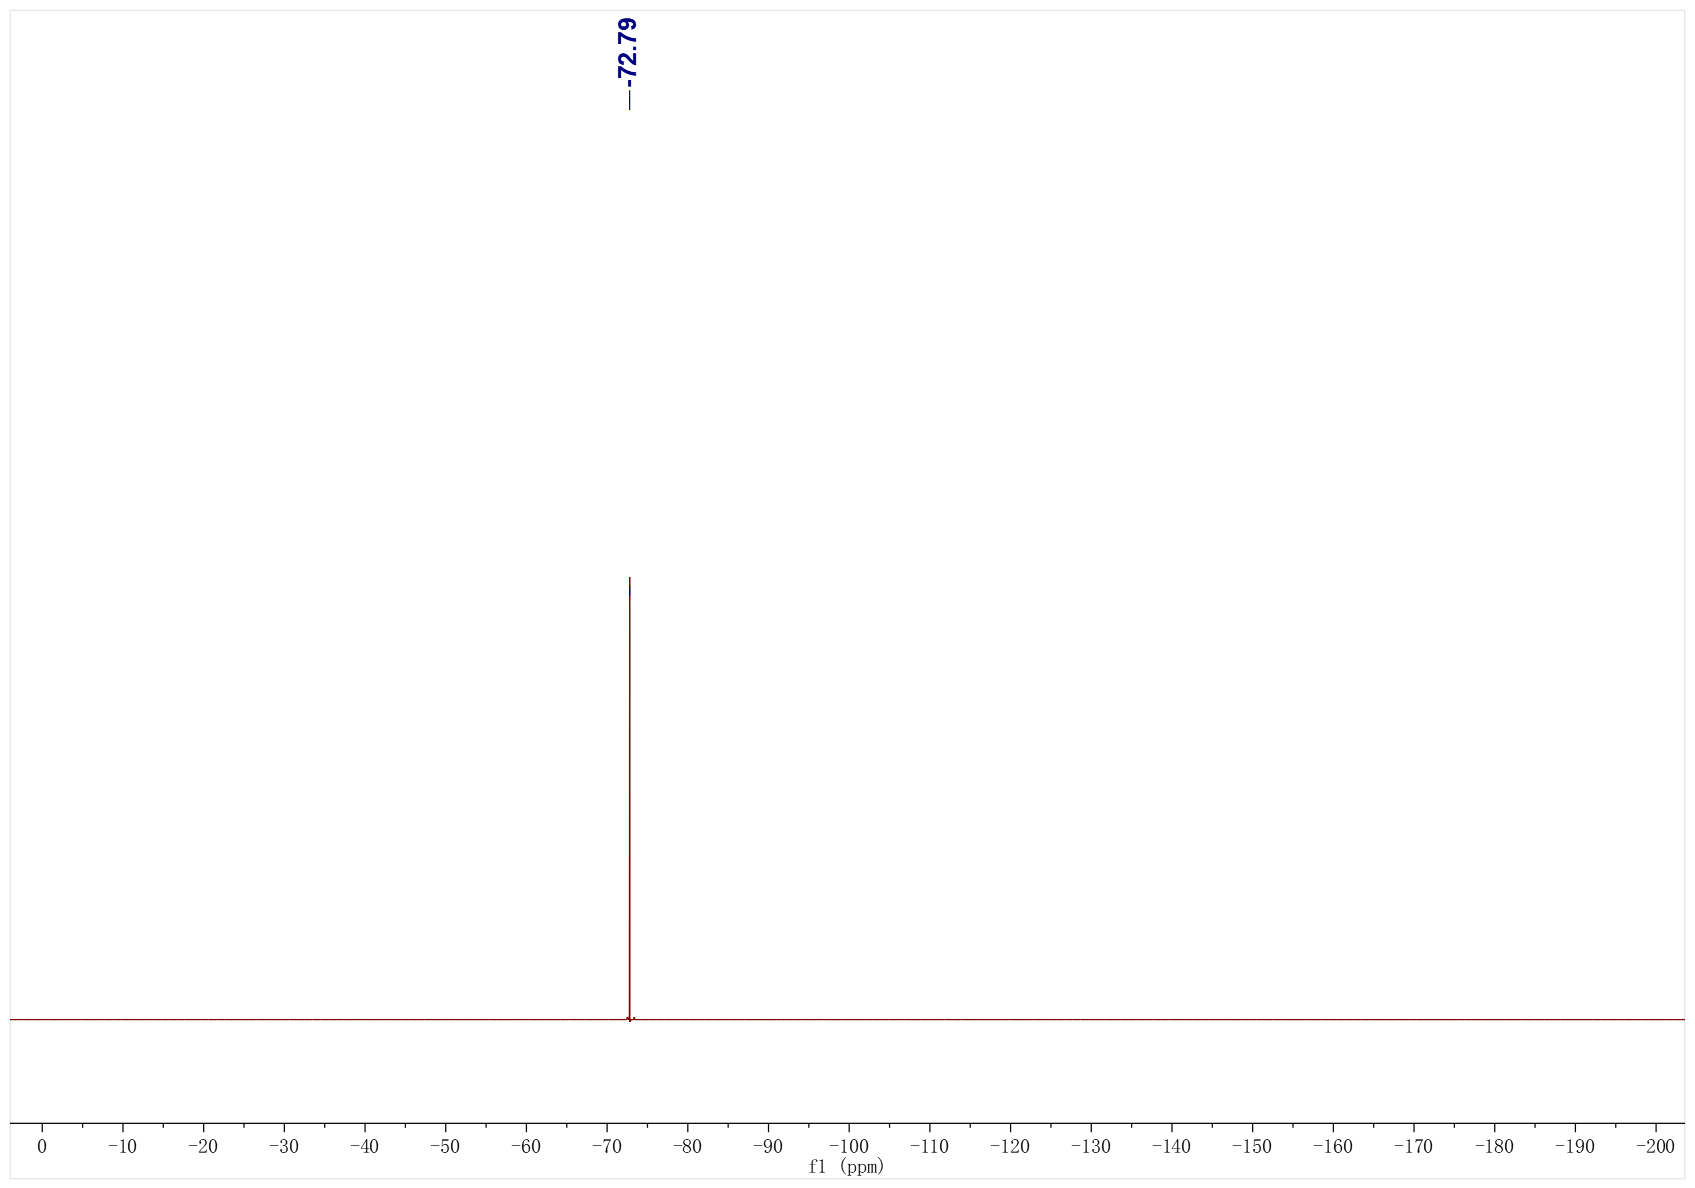


**1aw; 1H NMR (500 MHz, CDCl3); 13C NMR (126 MHz, CDCl3)**


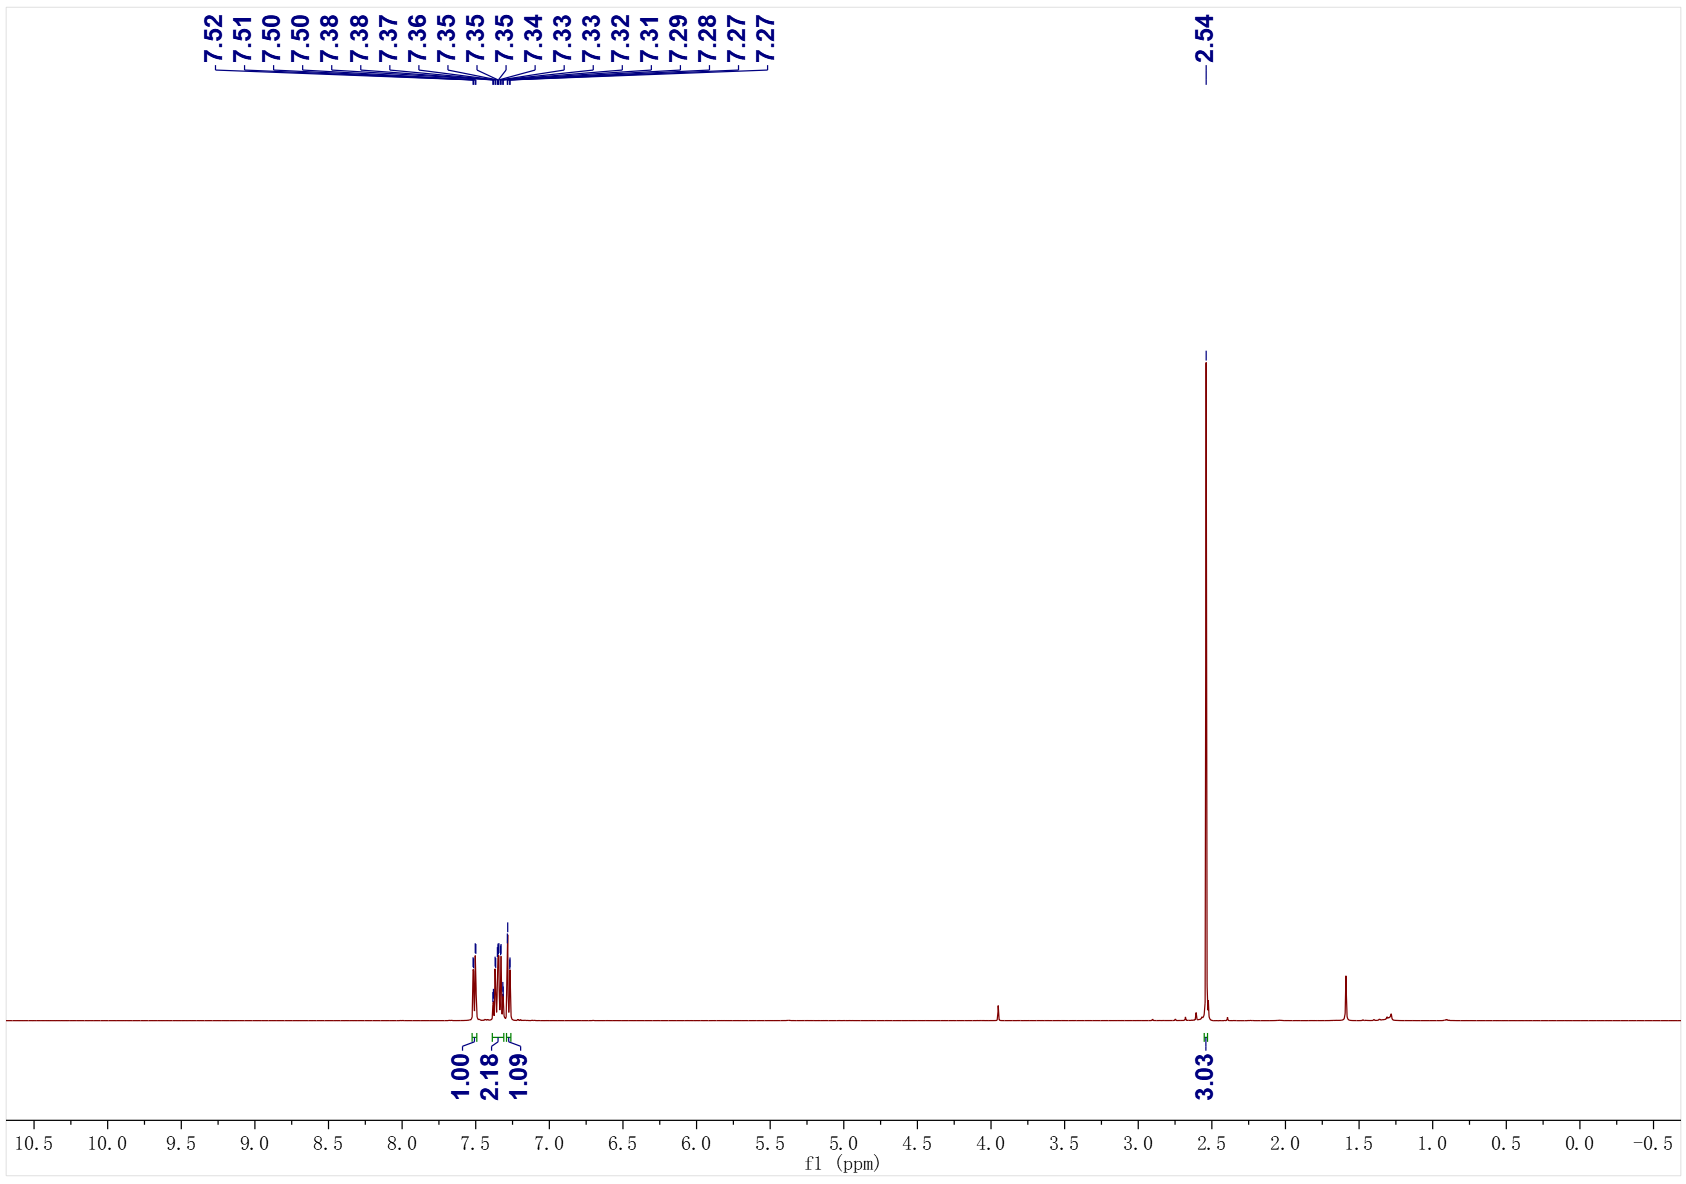


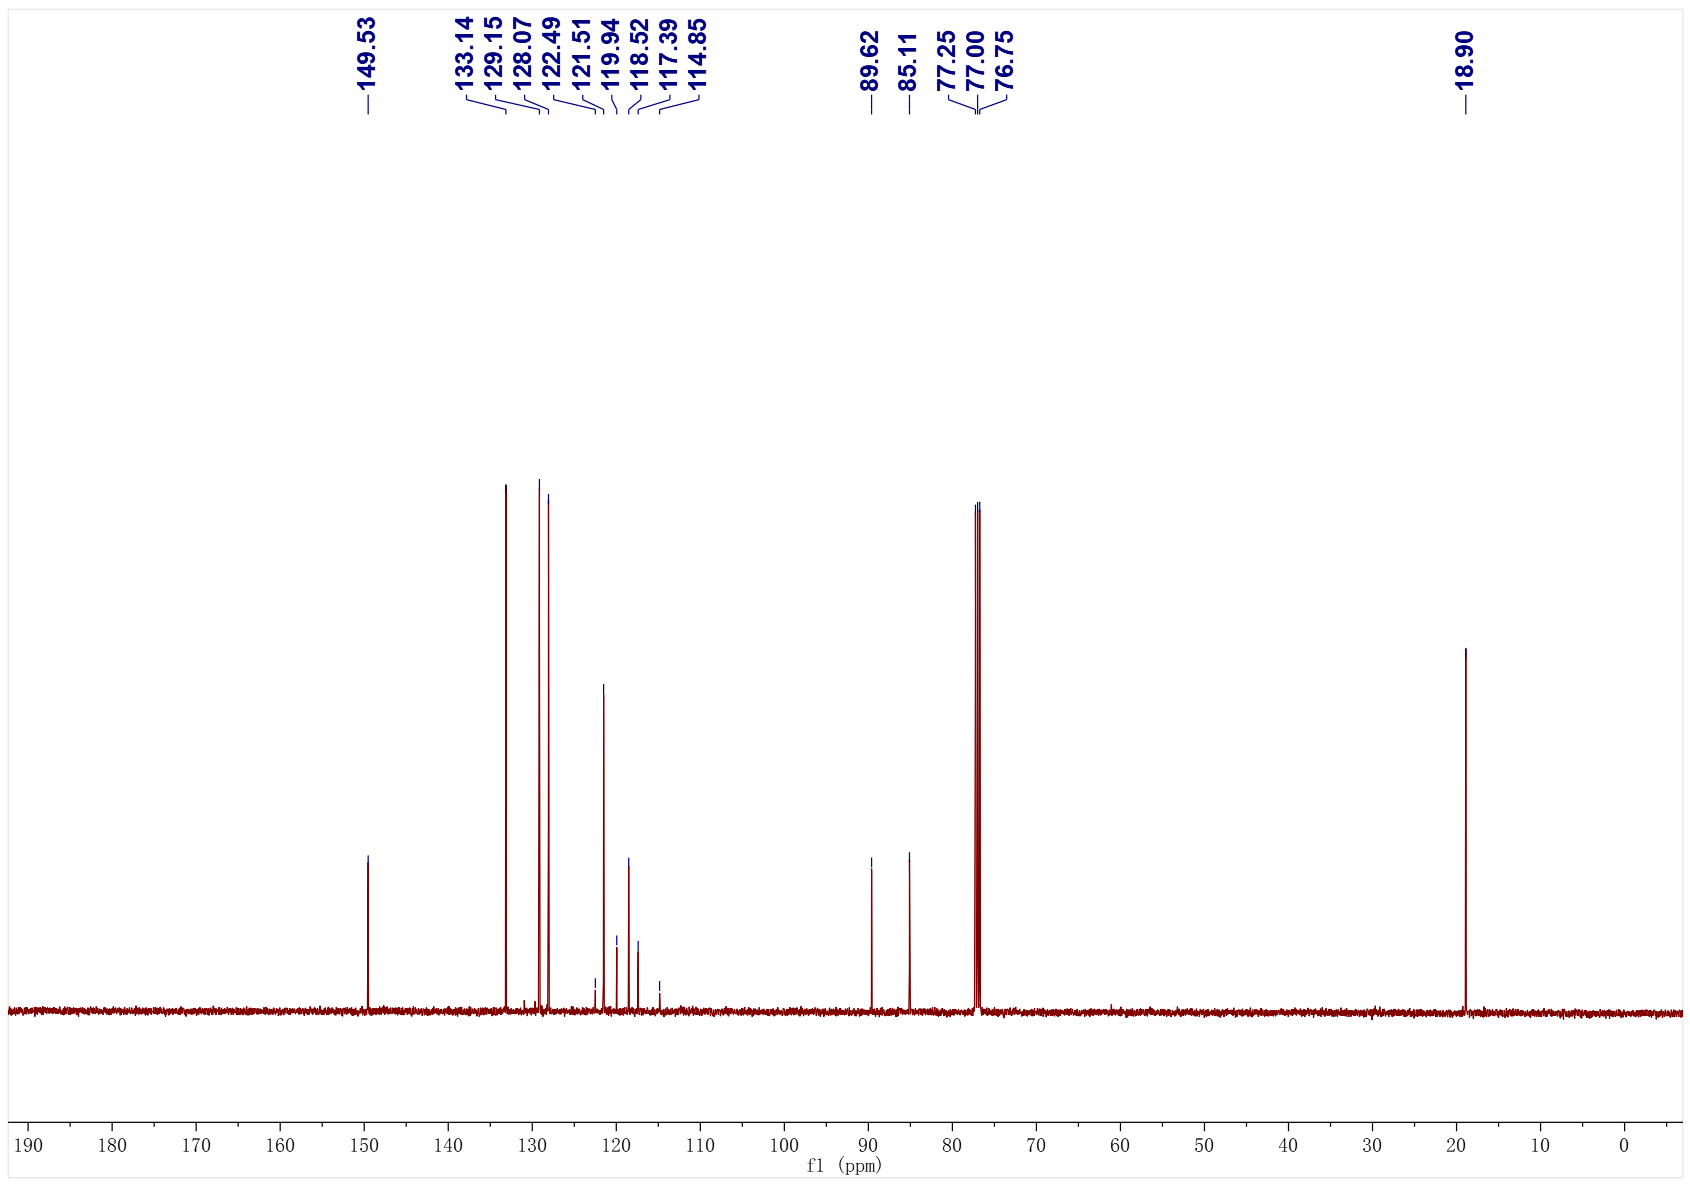


**1aw; 19F NMR (471 MHz, CDCl3)**


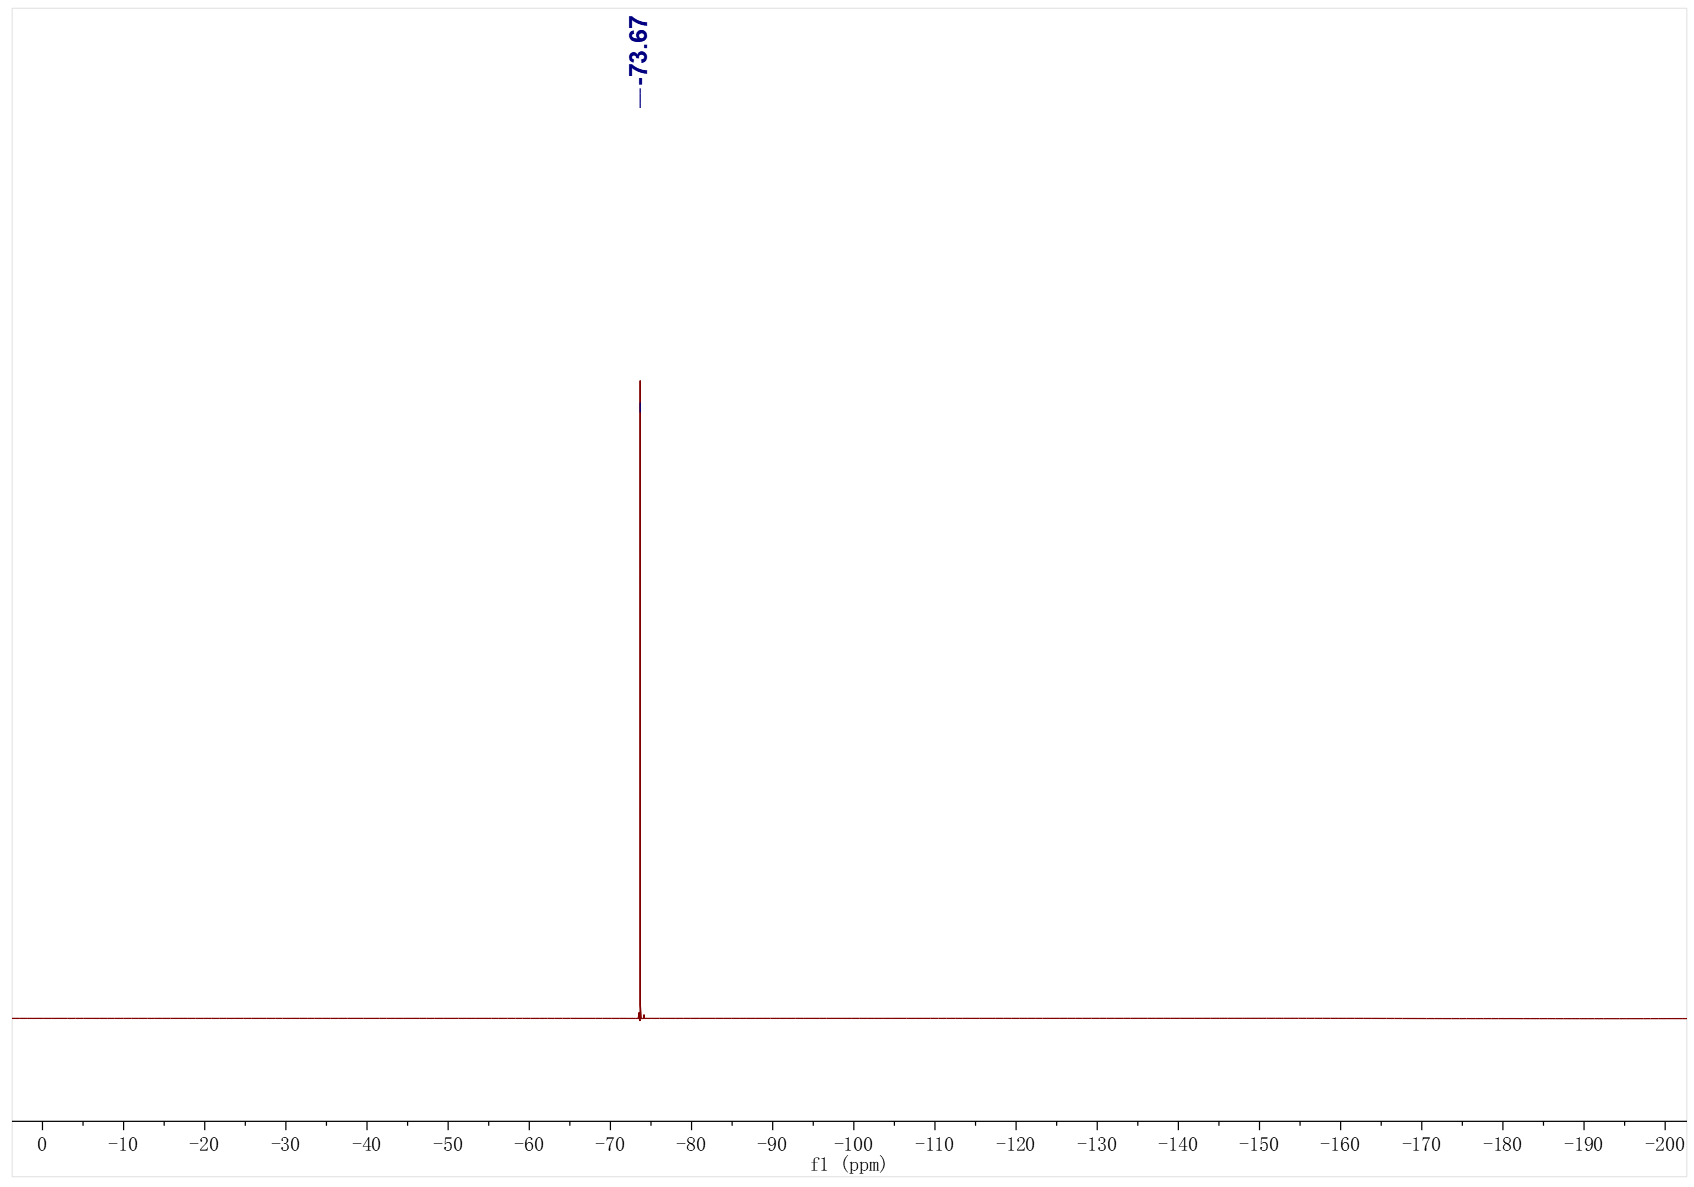


**1ax; 1H NMR (500 MHz, CDCl3); 13C NMR (126 MHz, CDCl3)**


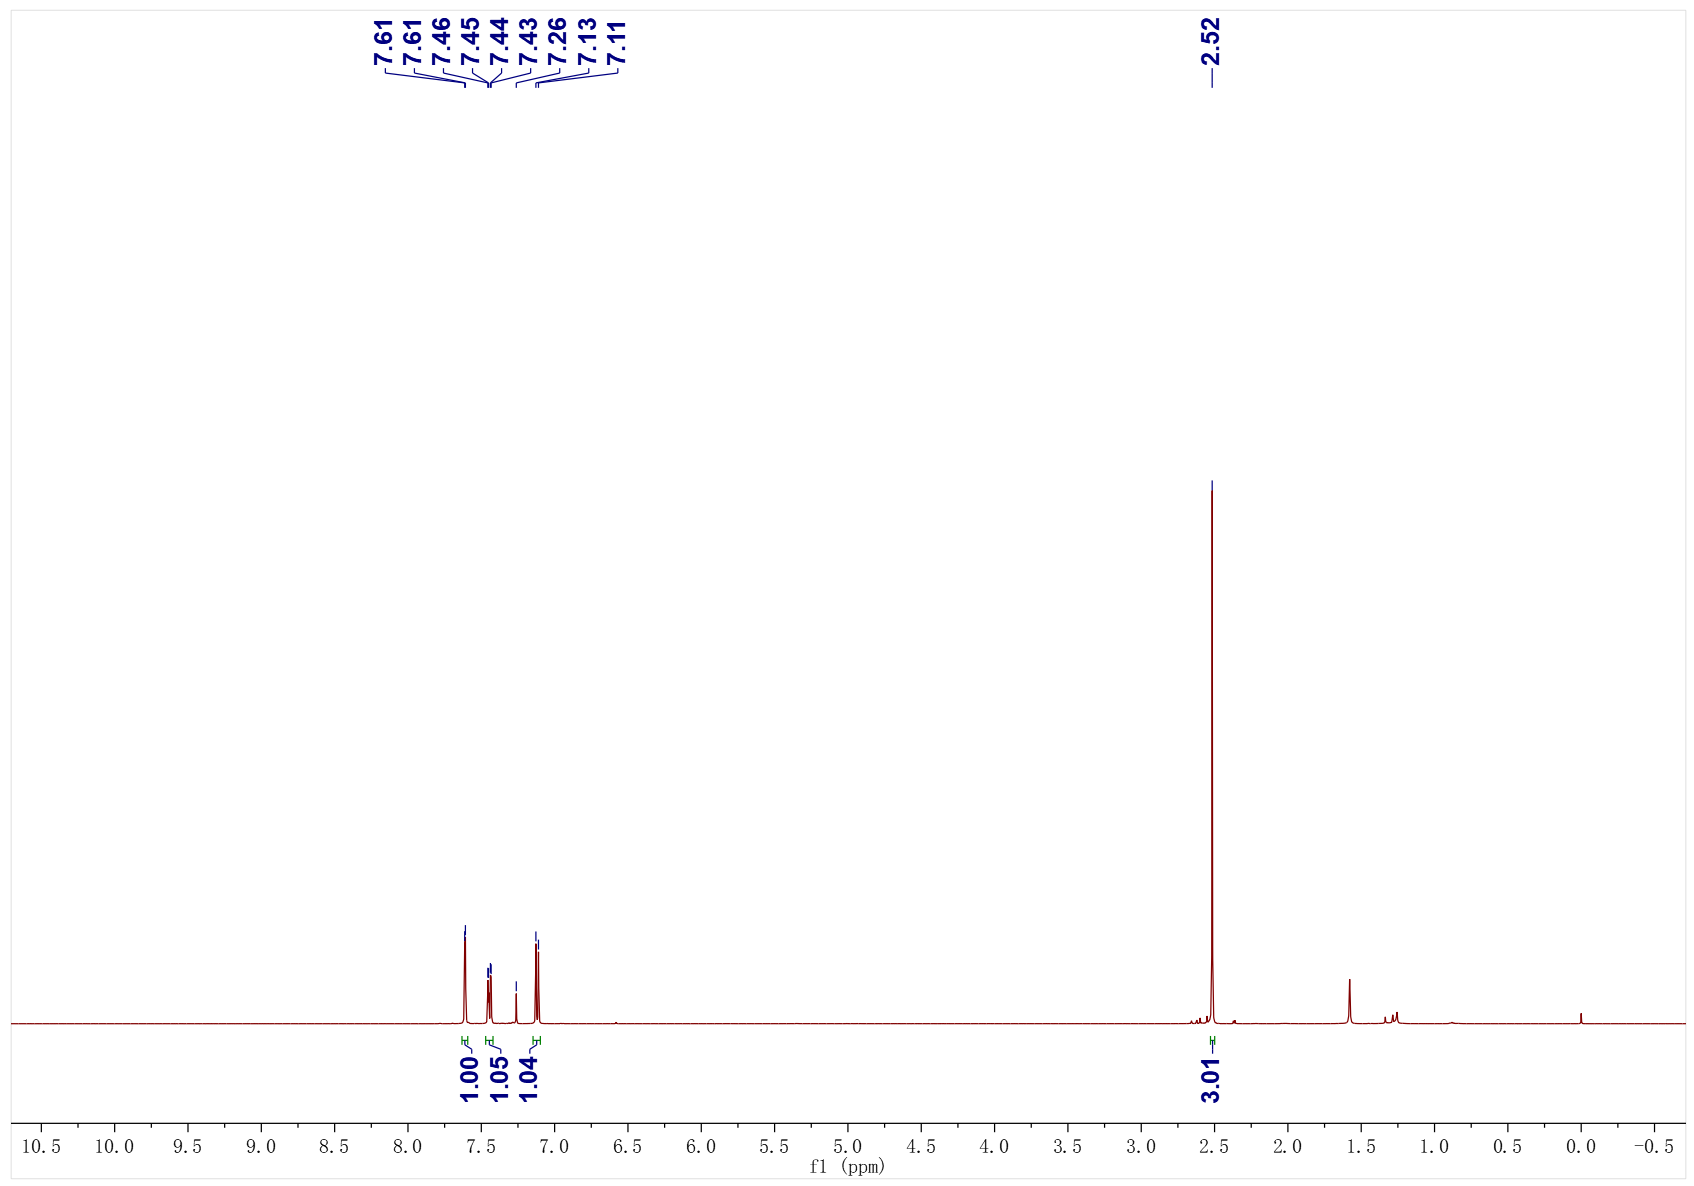


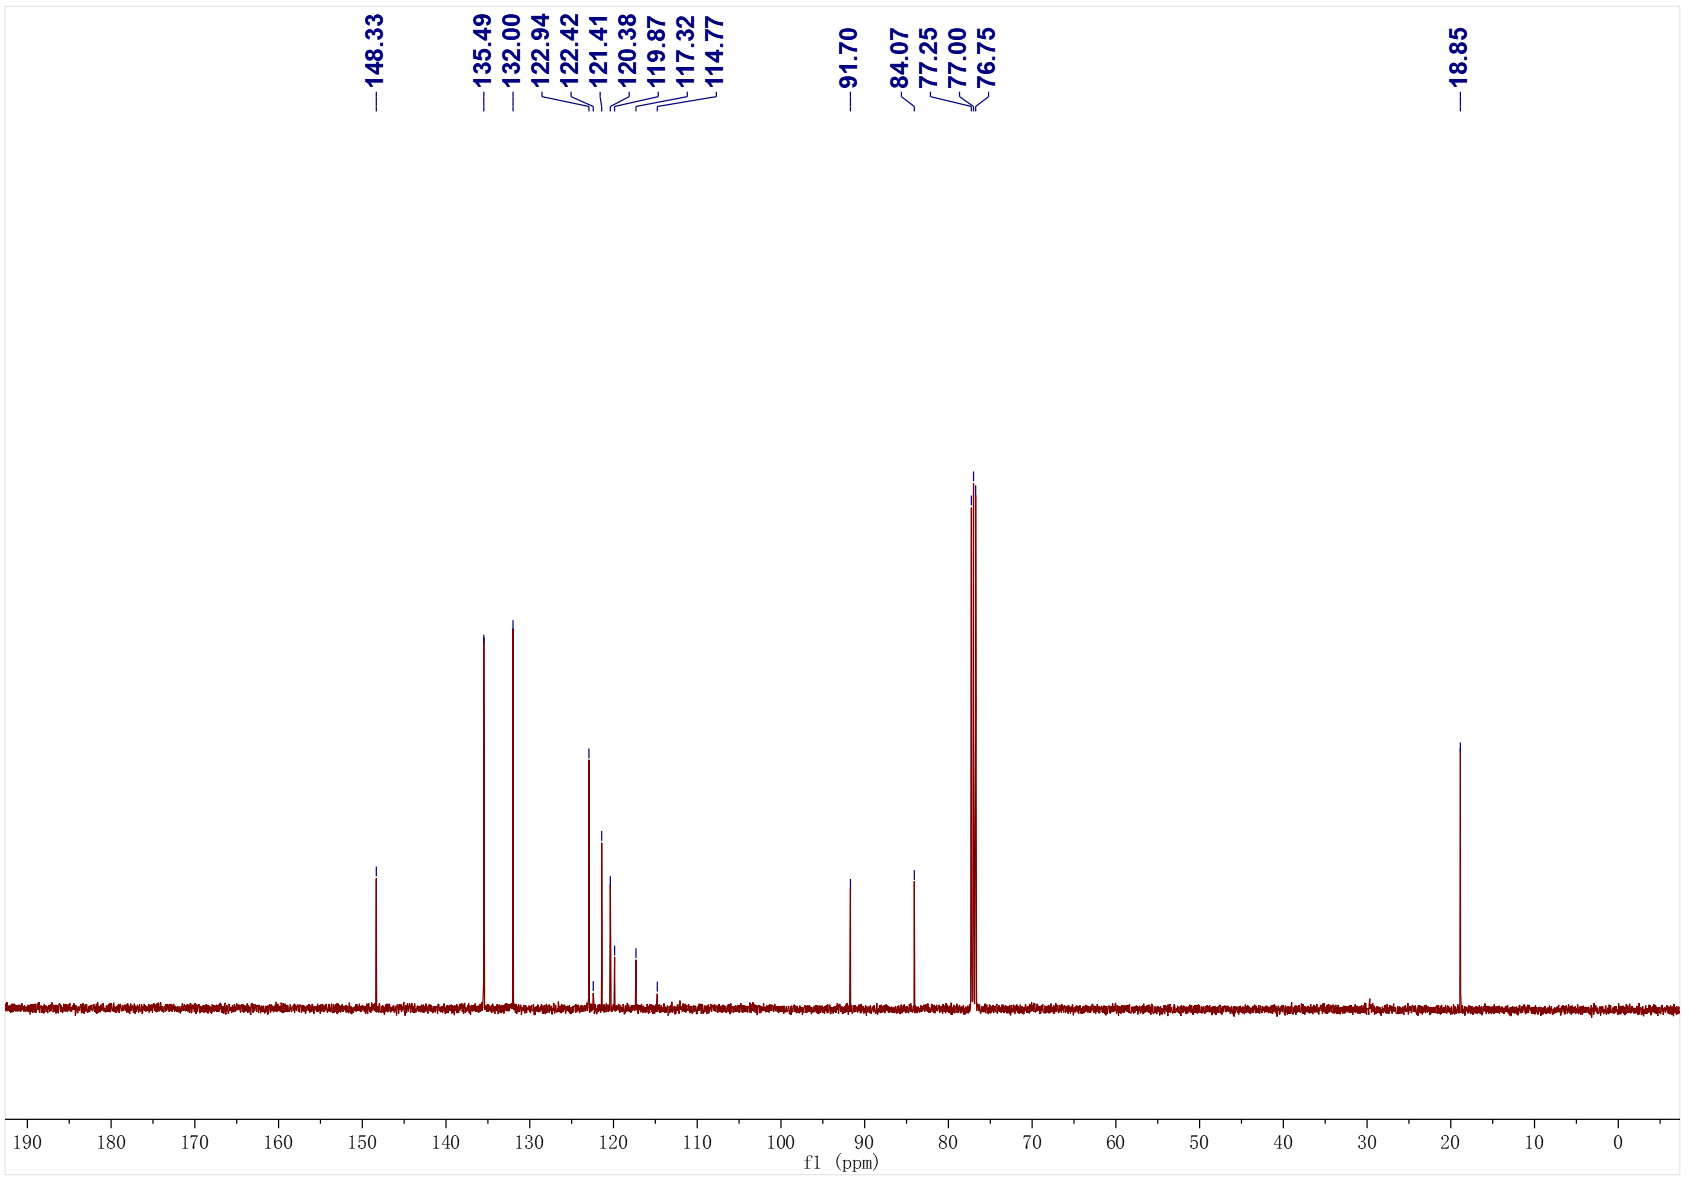


**1ay; 1H NMR (500 MHz, CDCl3); 13C NMR (126 MHz, CDCl3)**


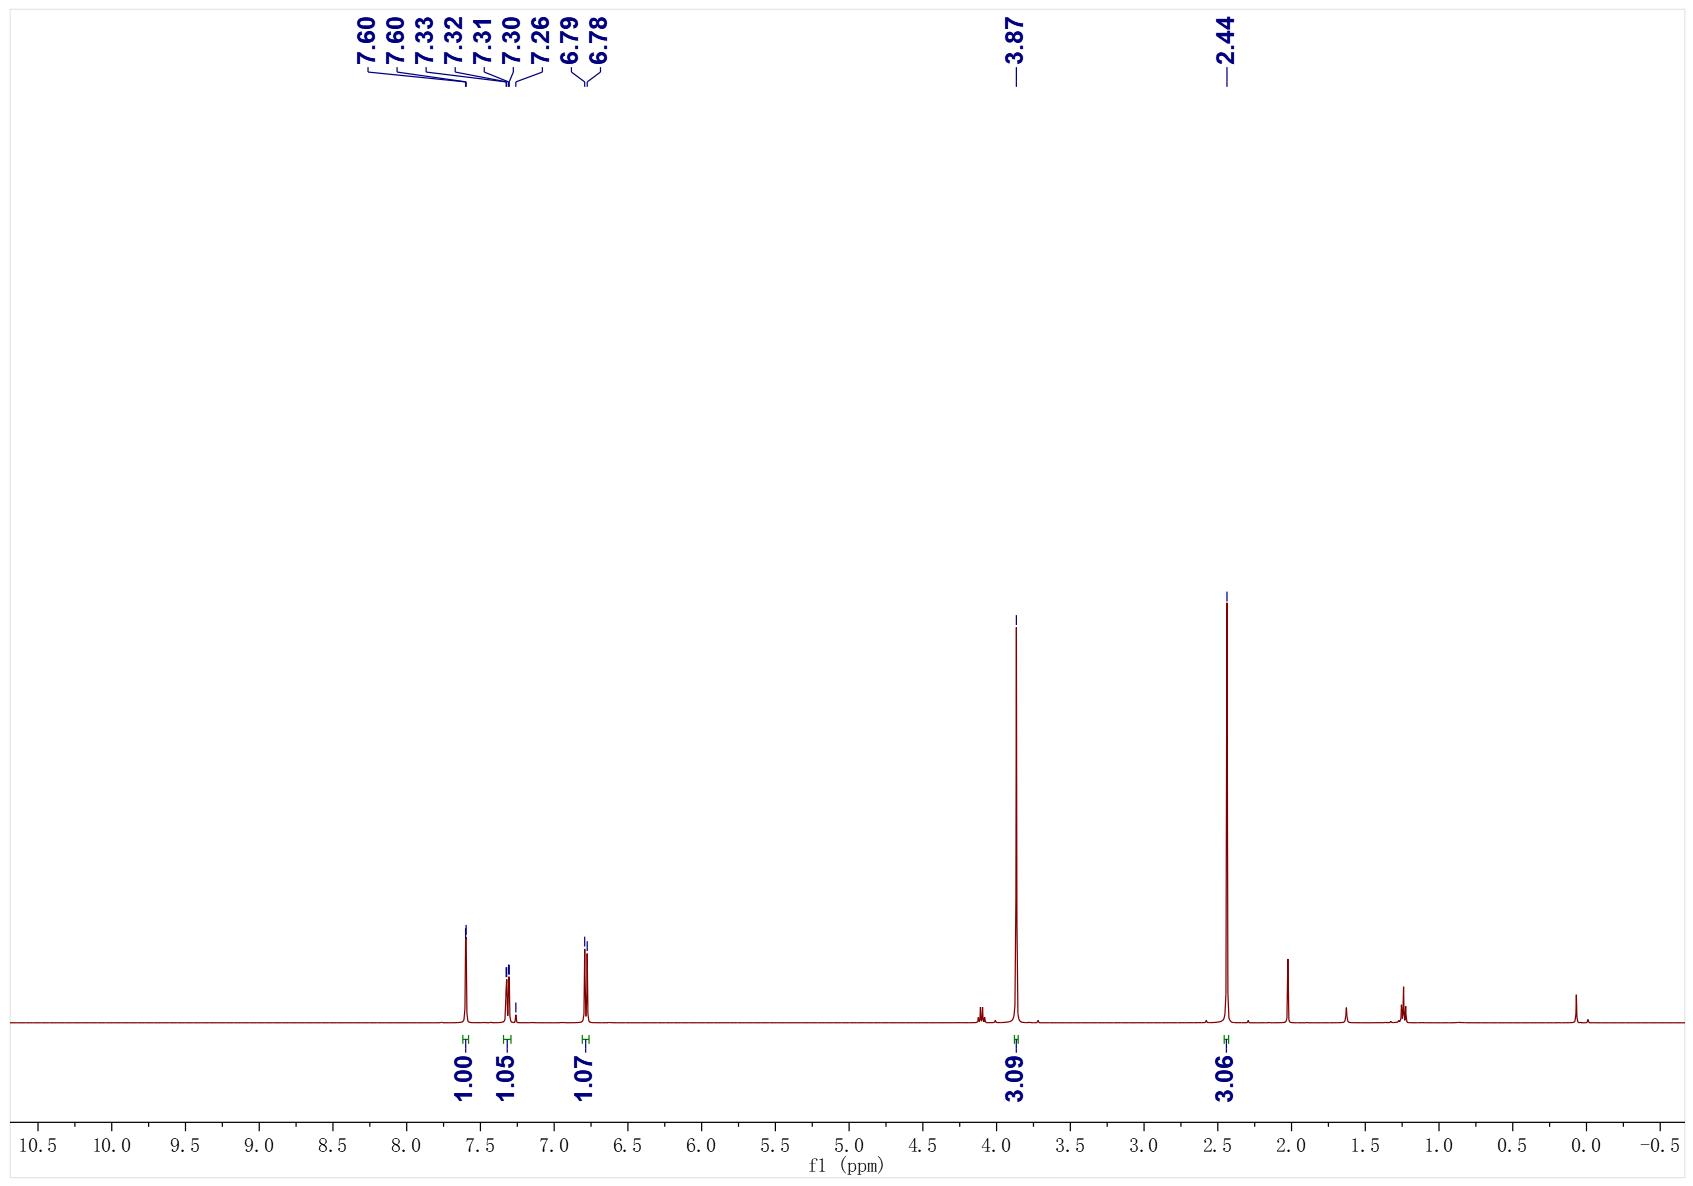


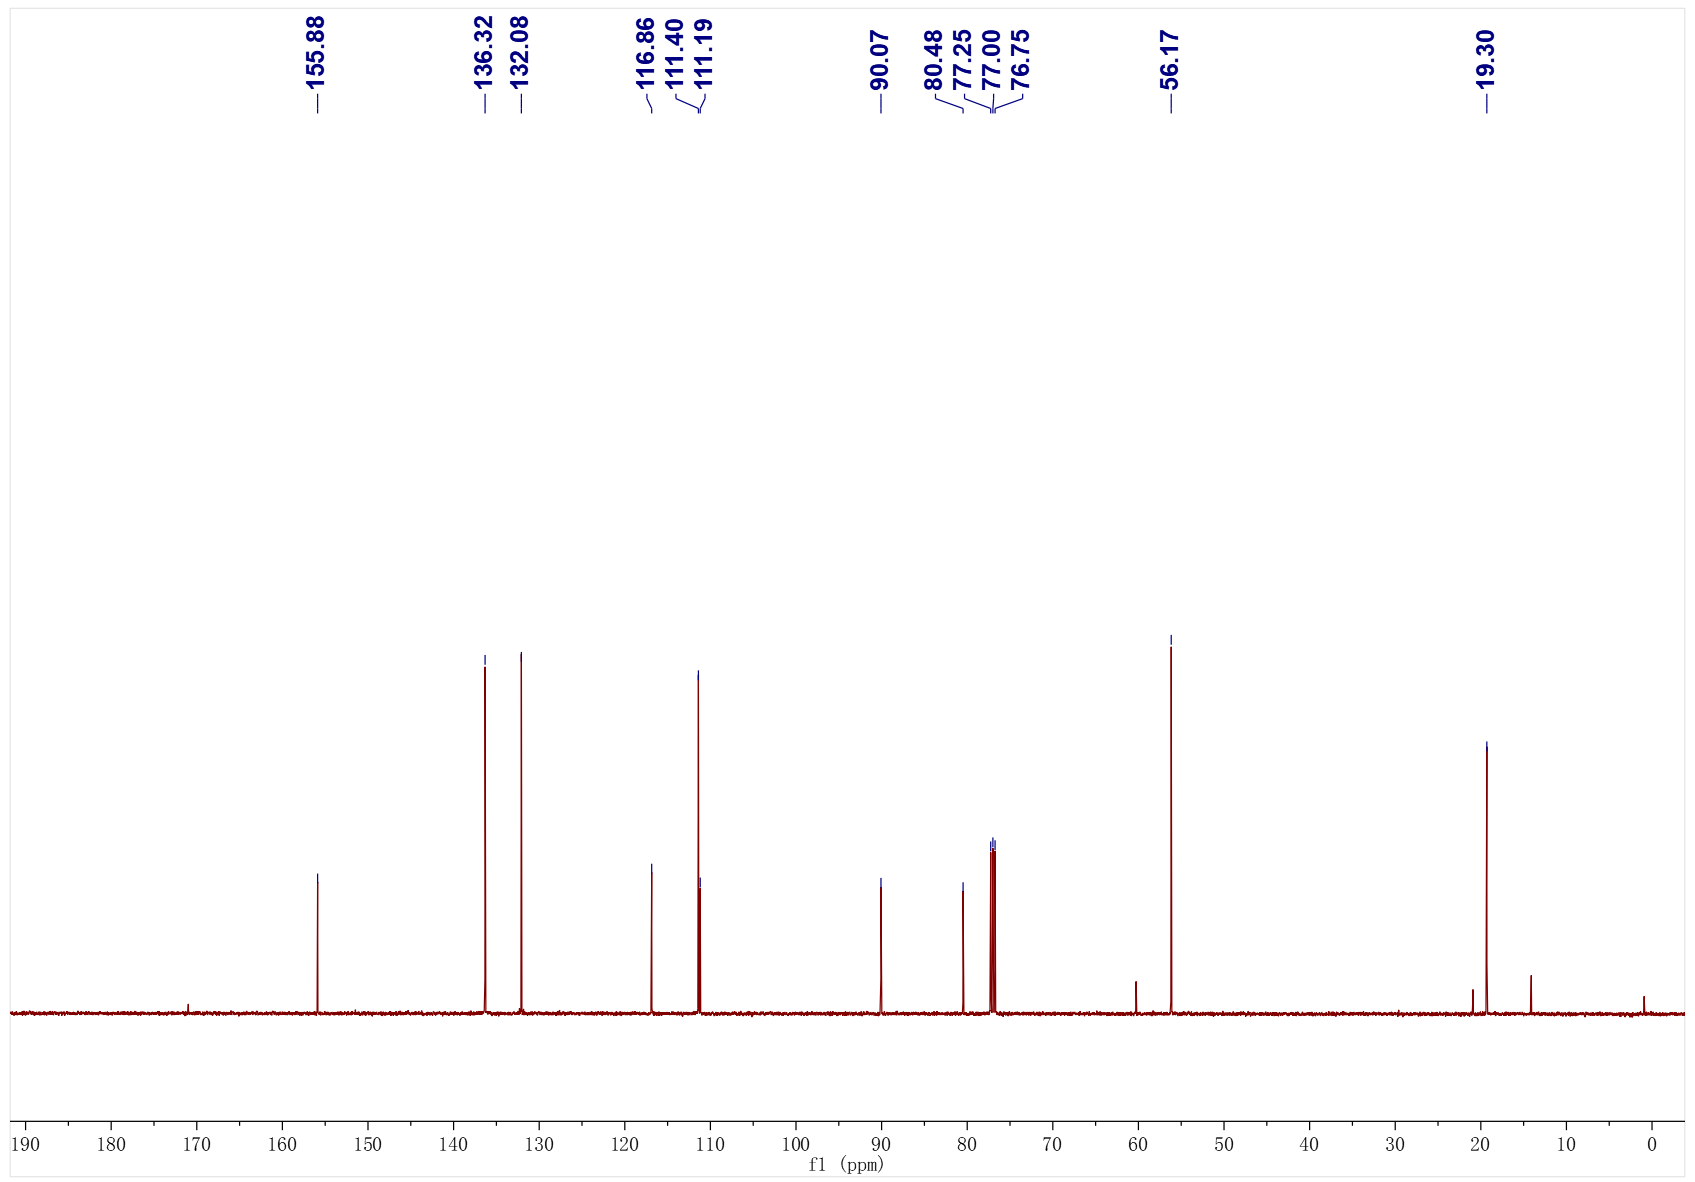


**1az; 1H NMR (400 MHz, CDCl3); 13C NMR (101 MHz, CDCl3)**


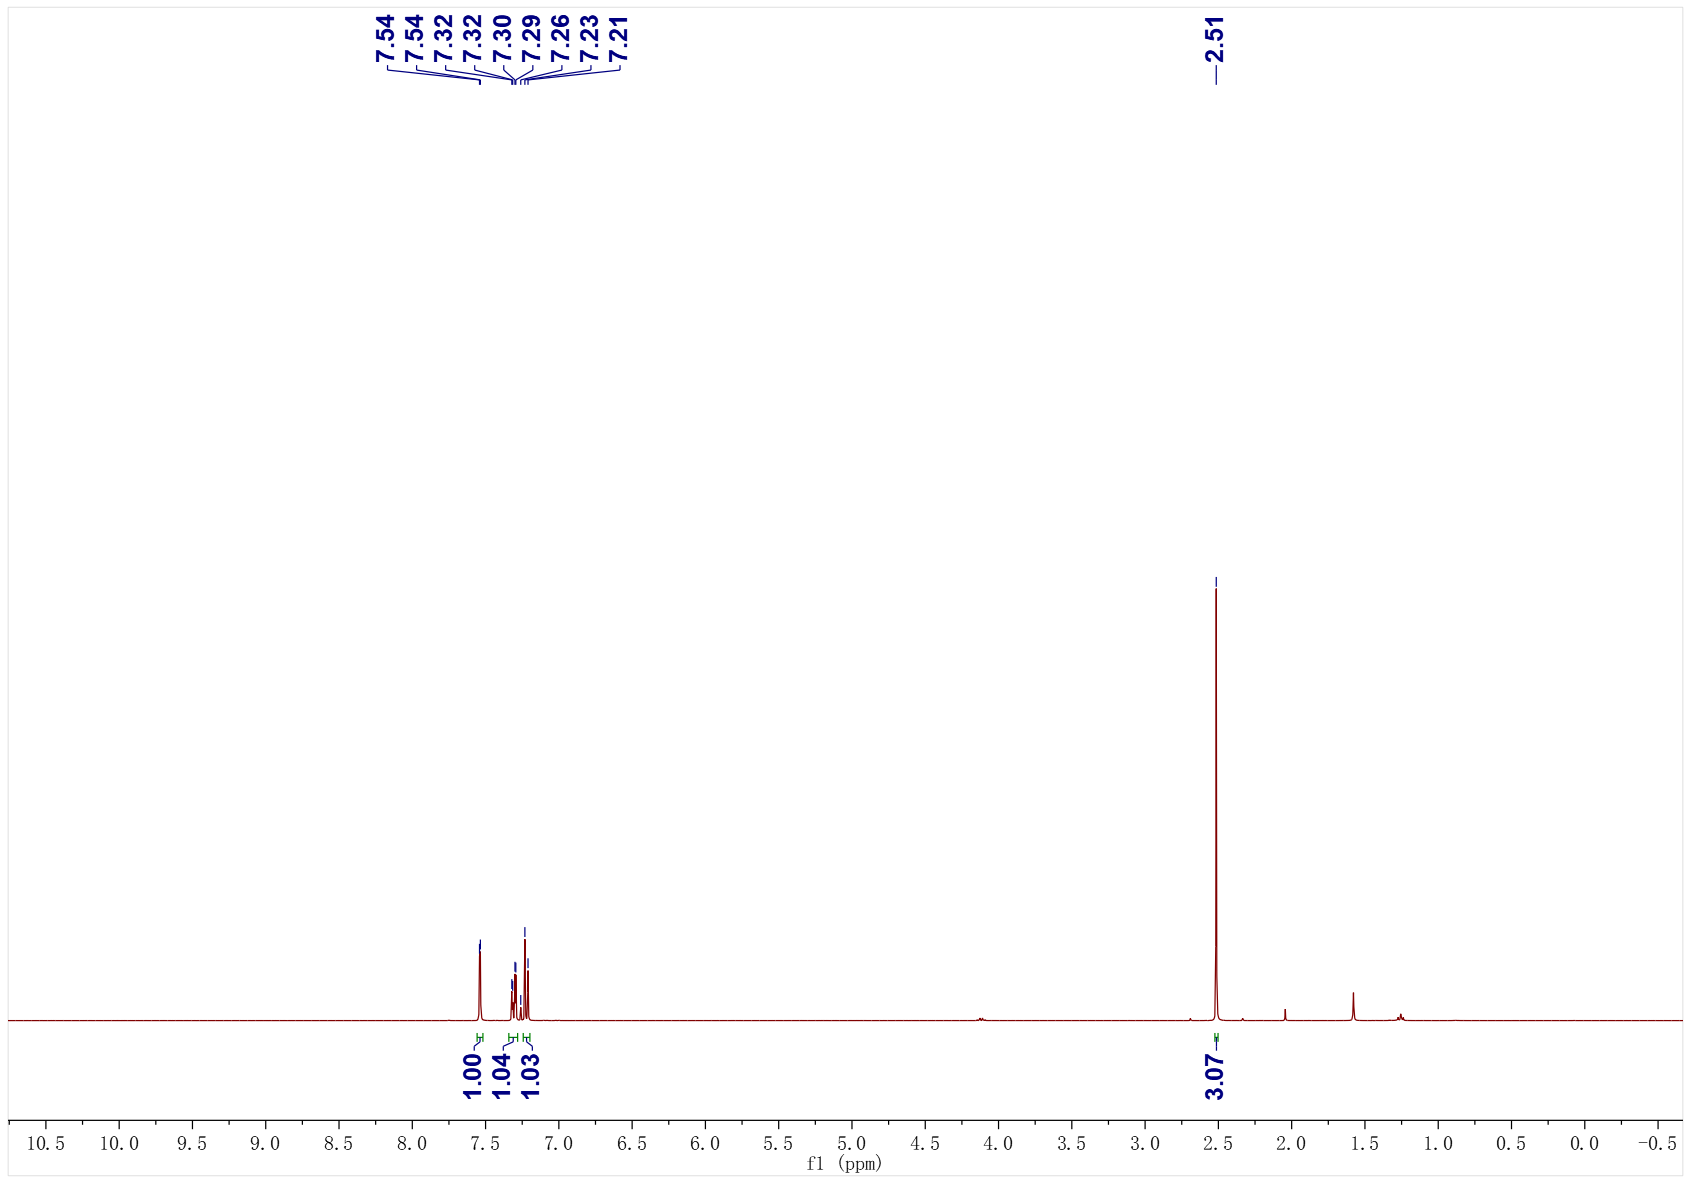

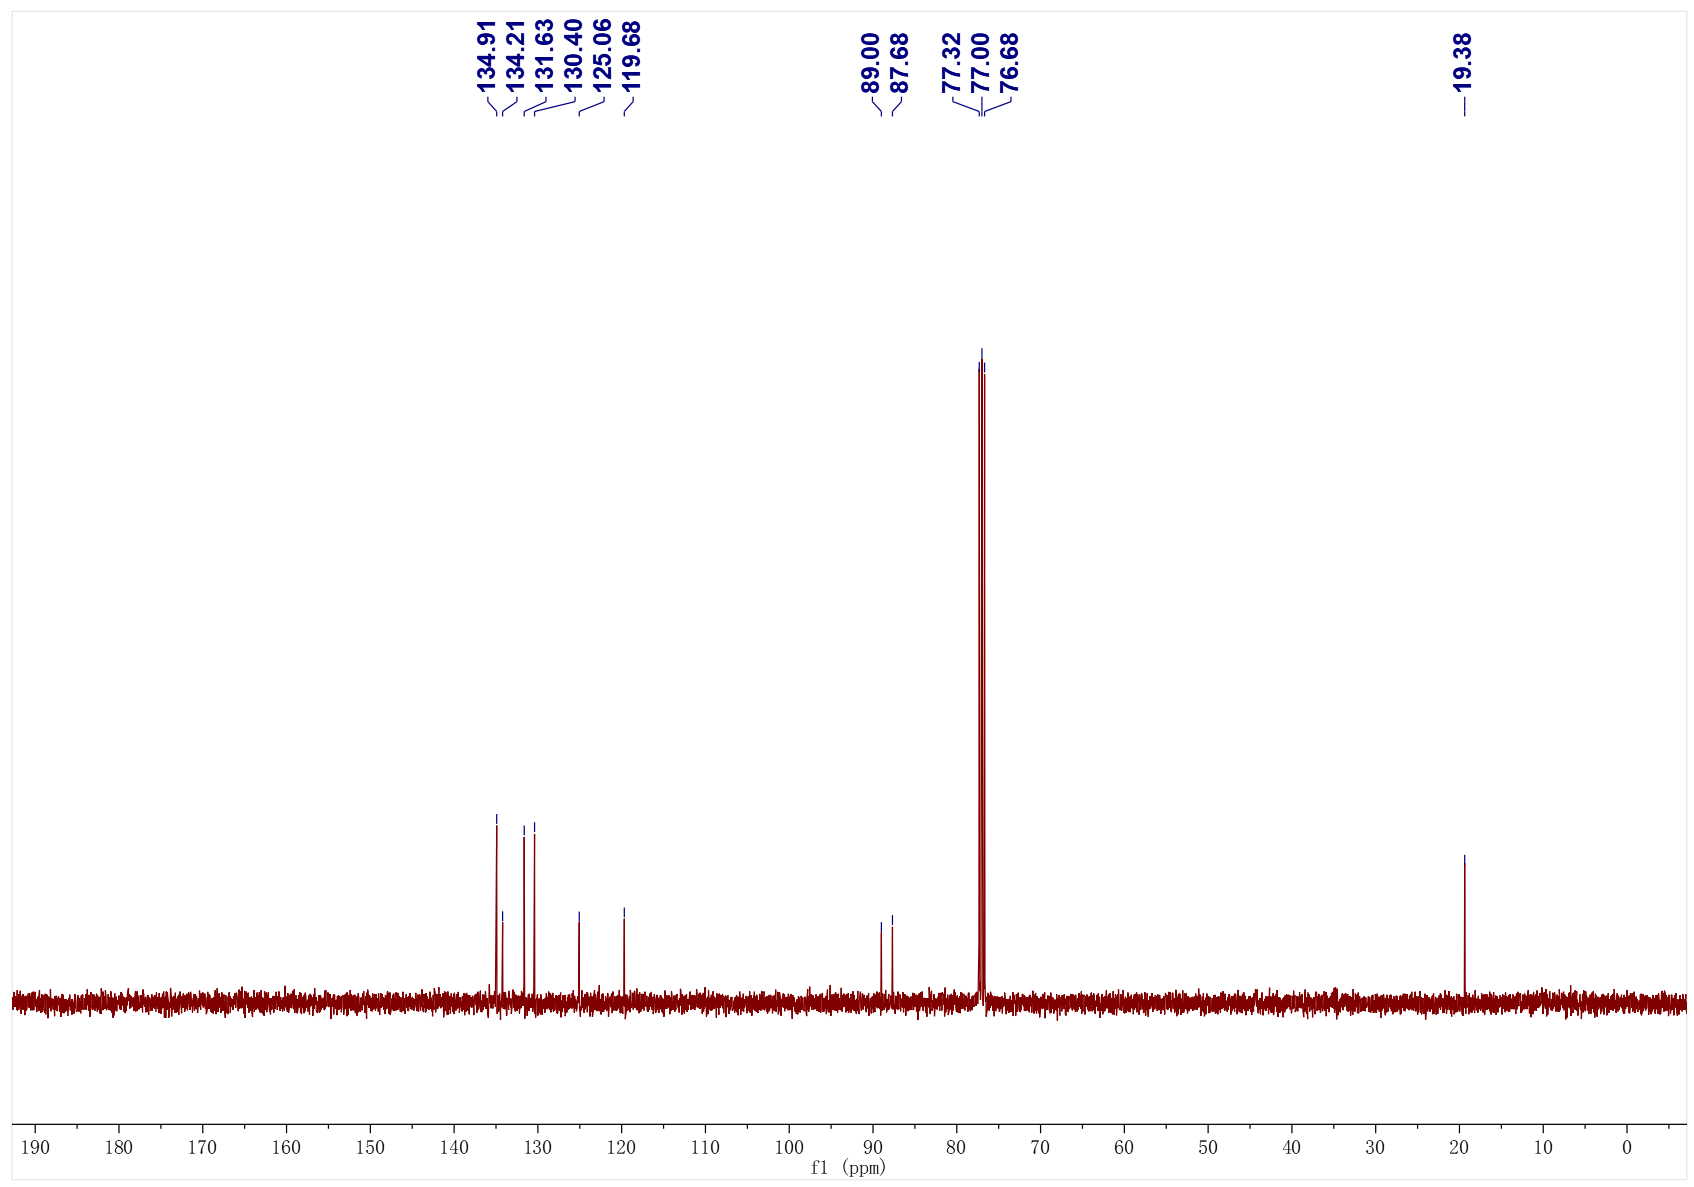


**1ba; 1H NMR (500 MHz, CDCl3); 13C NMR (126 MHz, CDCl3)**


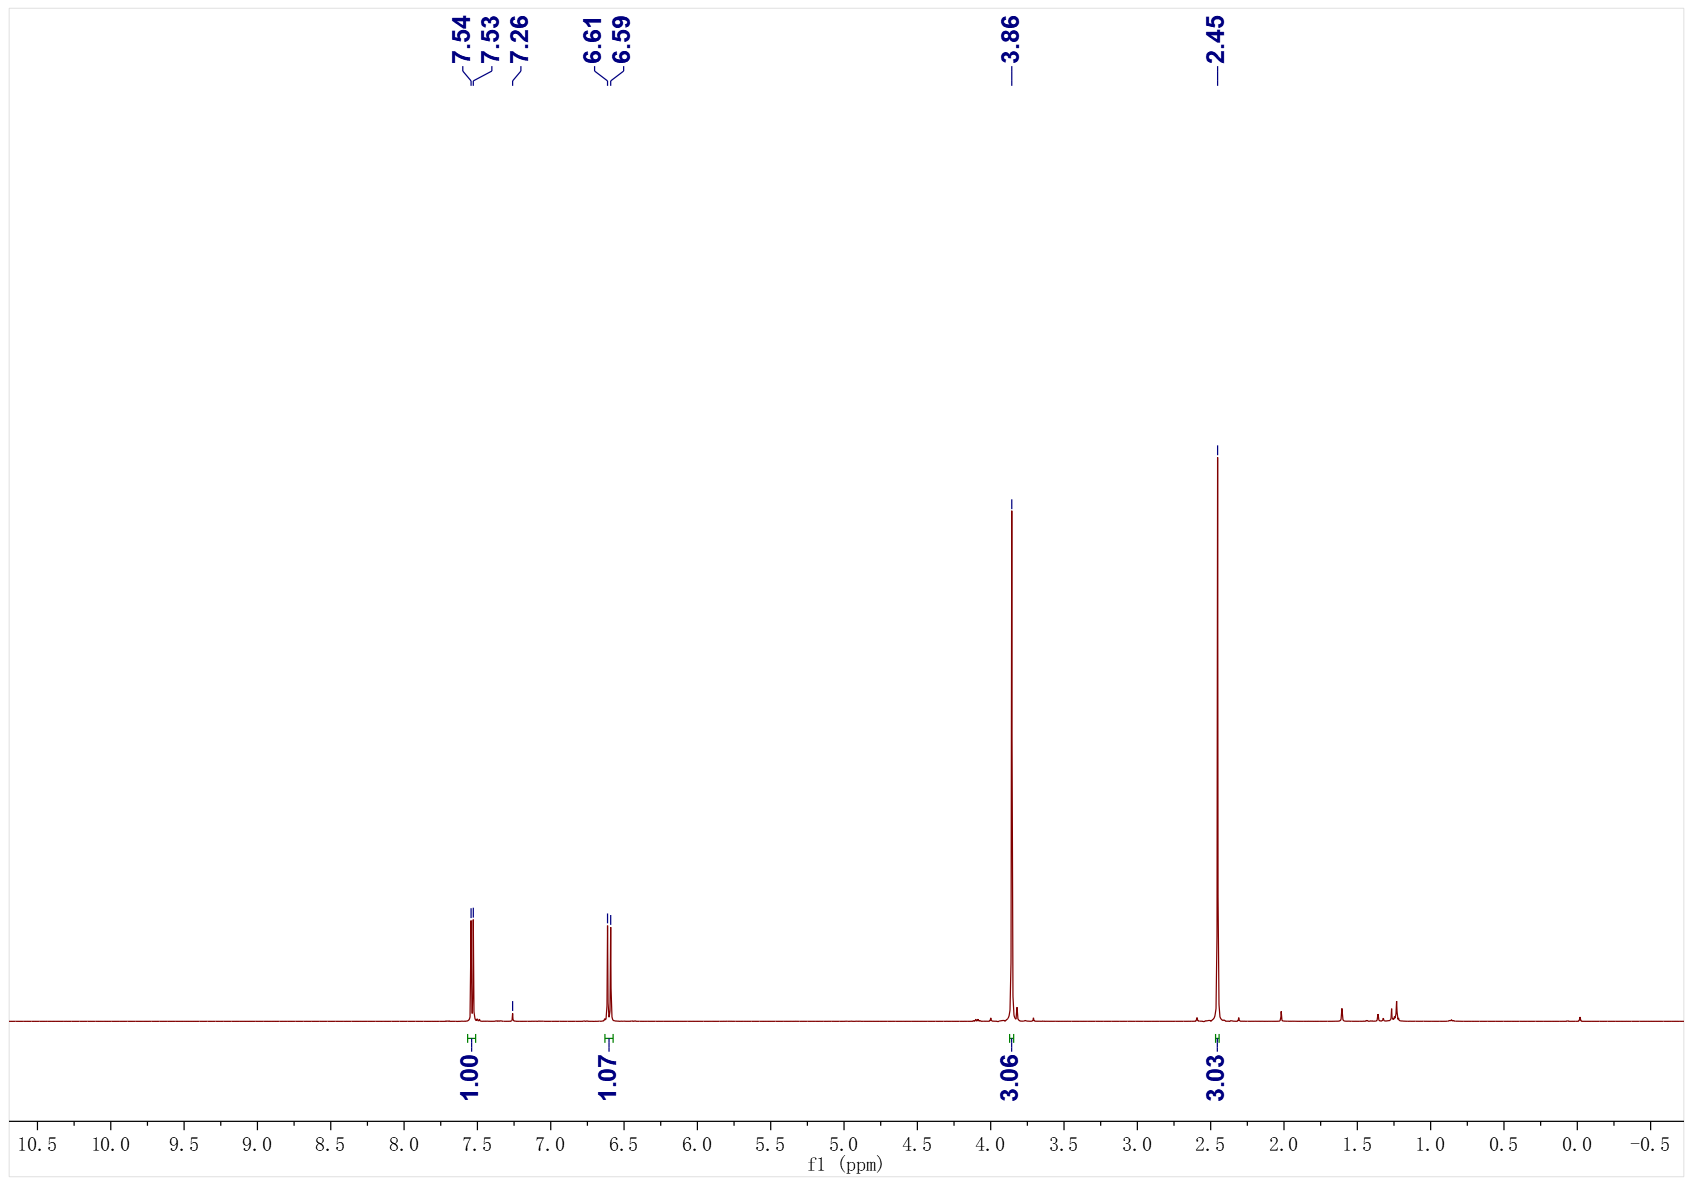

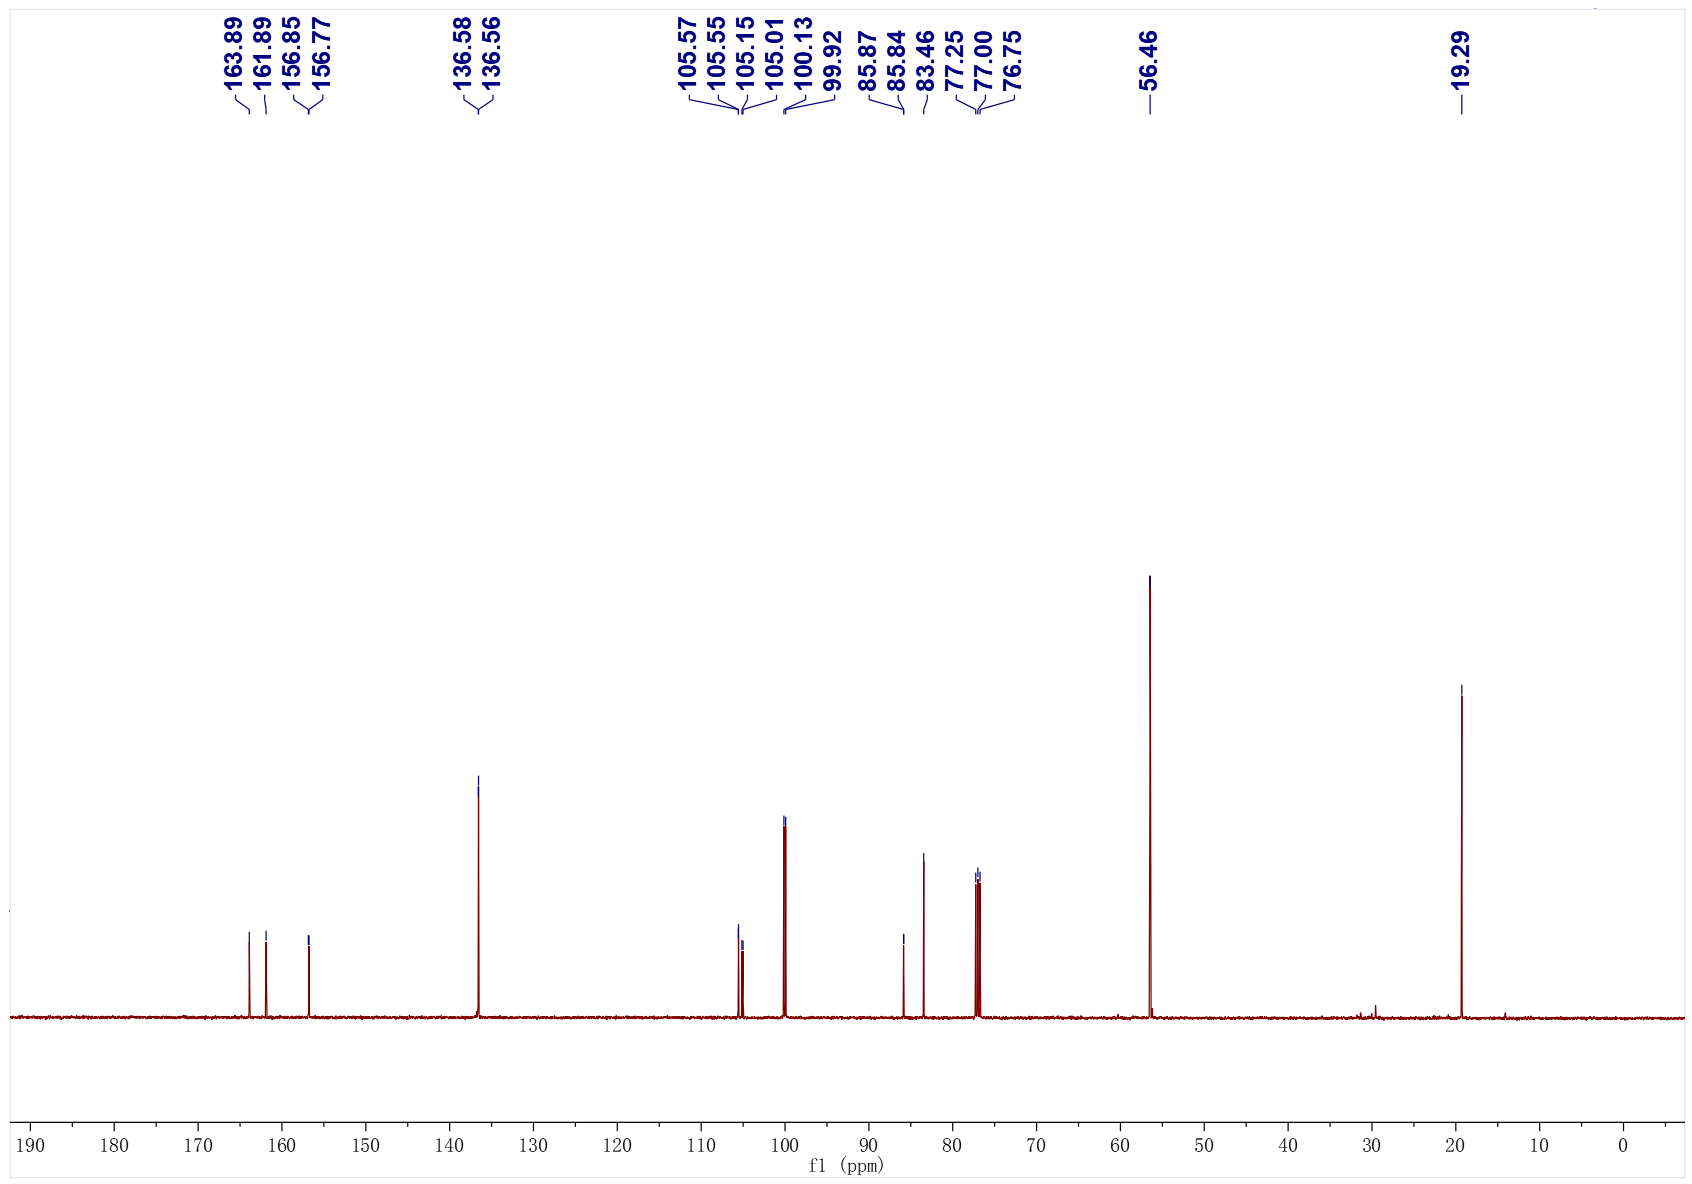


**1ba; 19F NMR (471 MHz, CDCl3)**


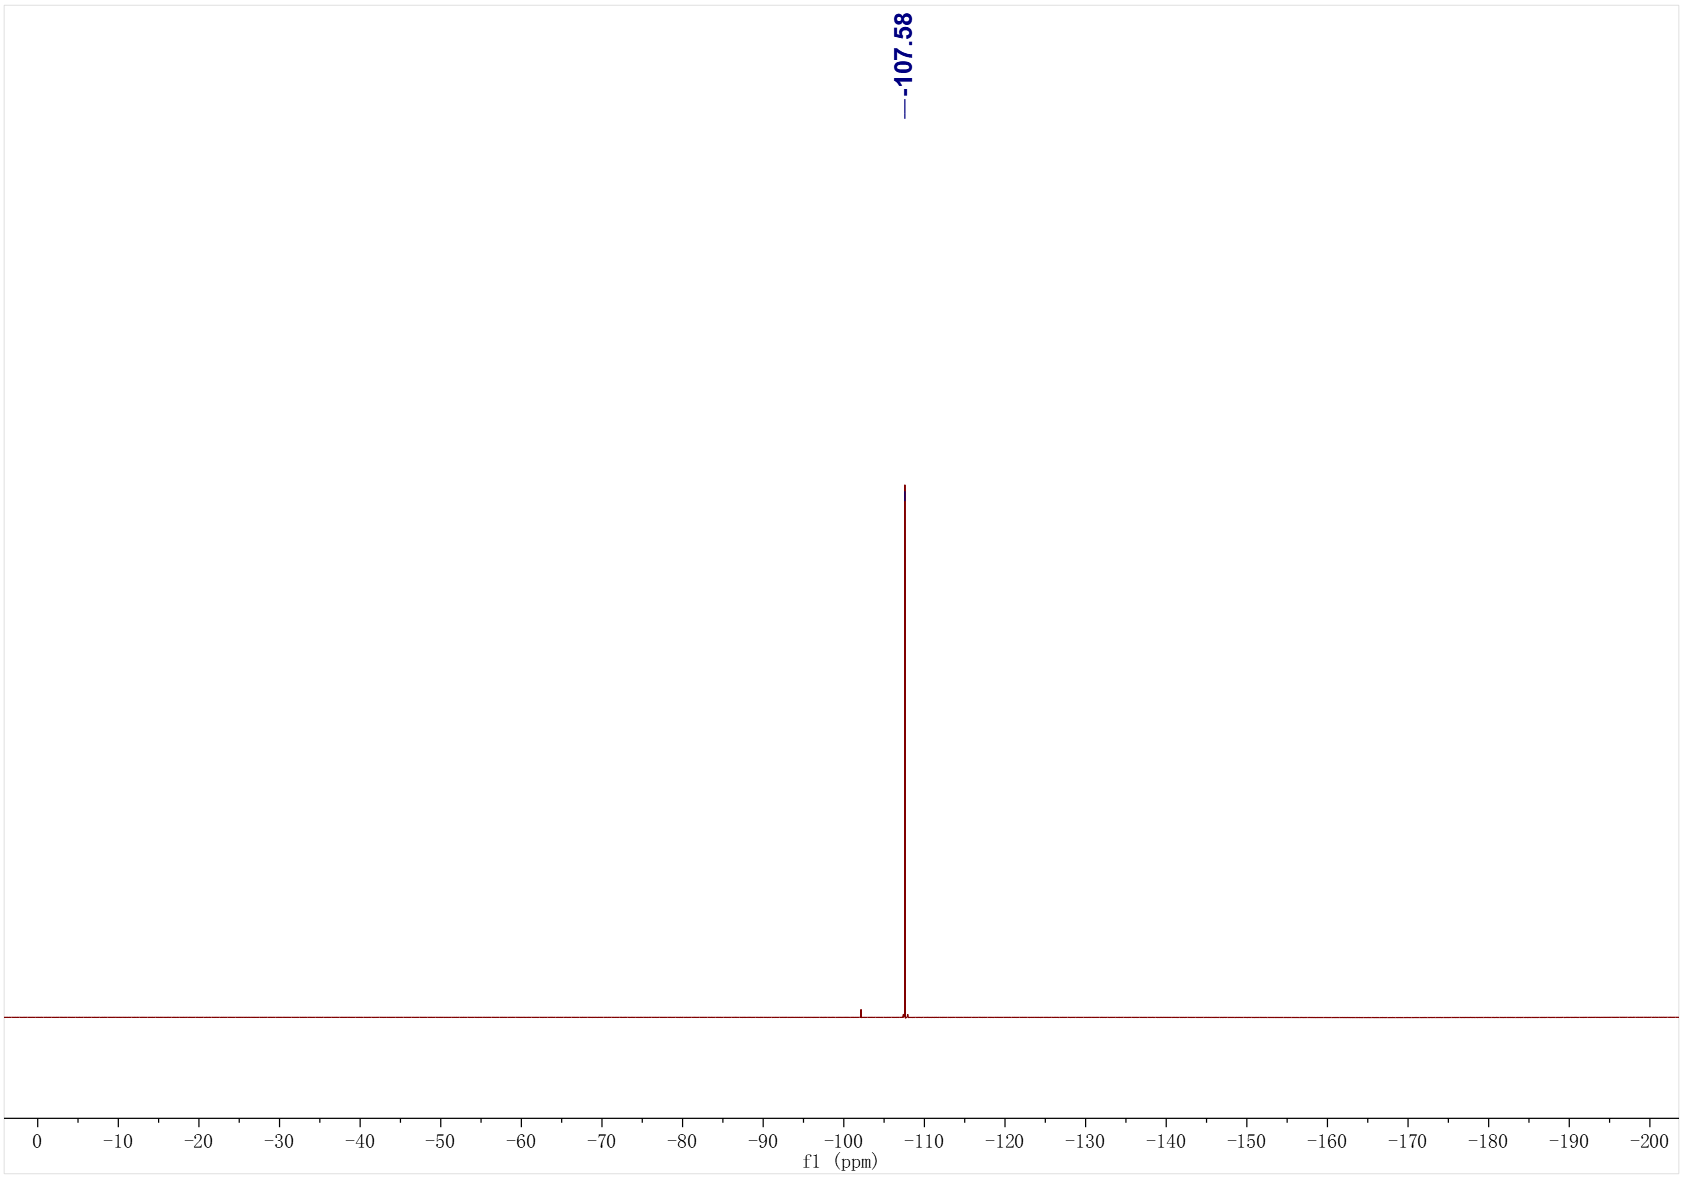


**1bb; 1H NMR (400 MHz, CDCl3); 13C NMR (126 MHz, CDCl3)**


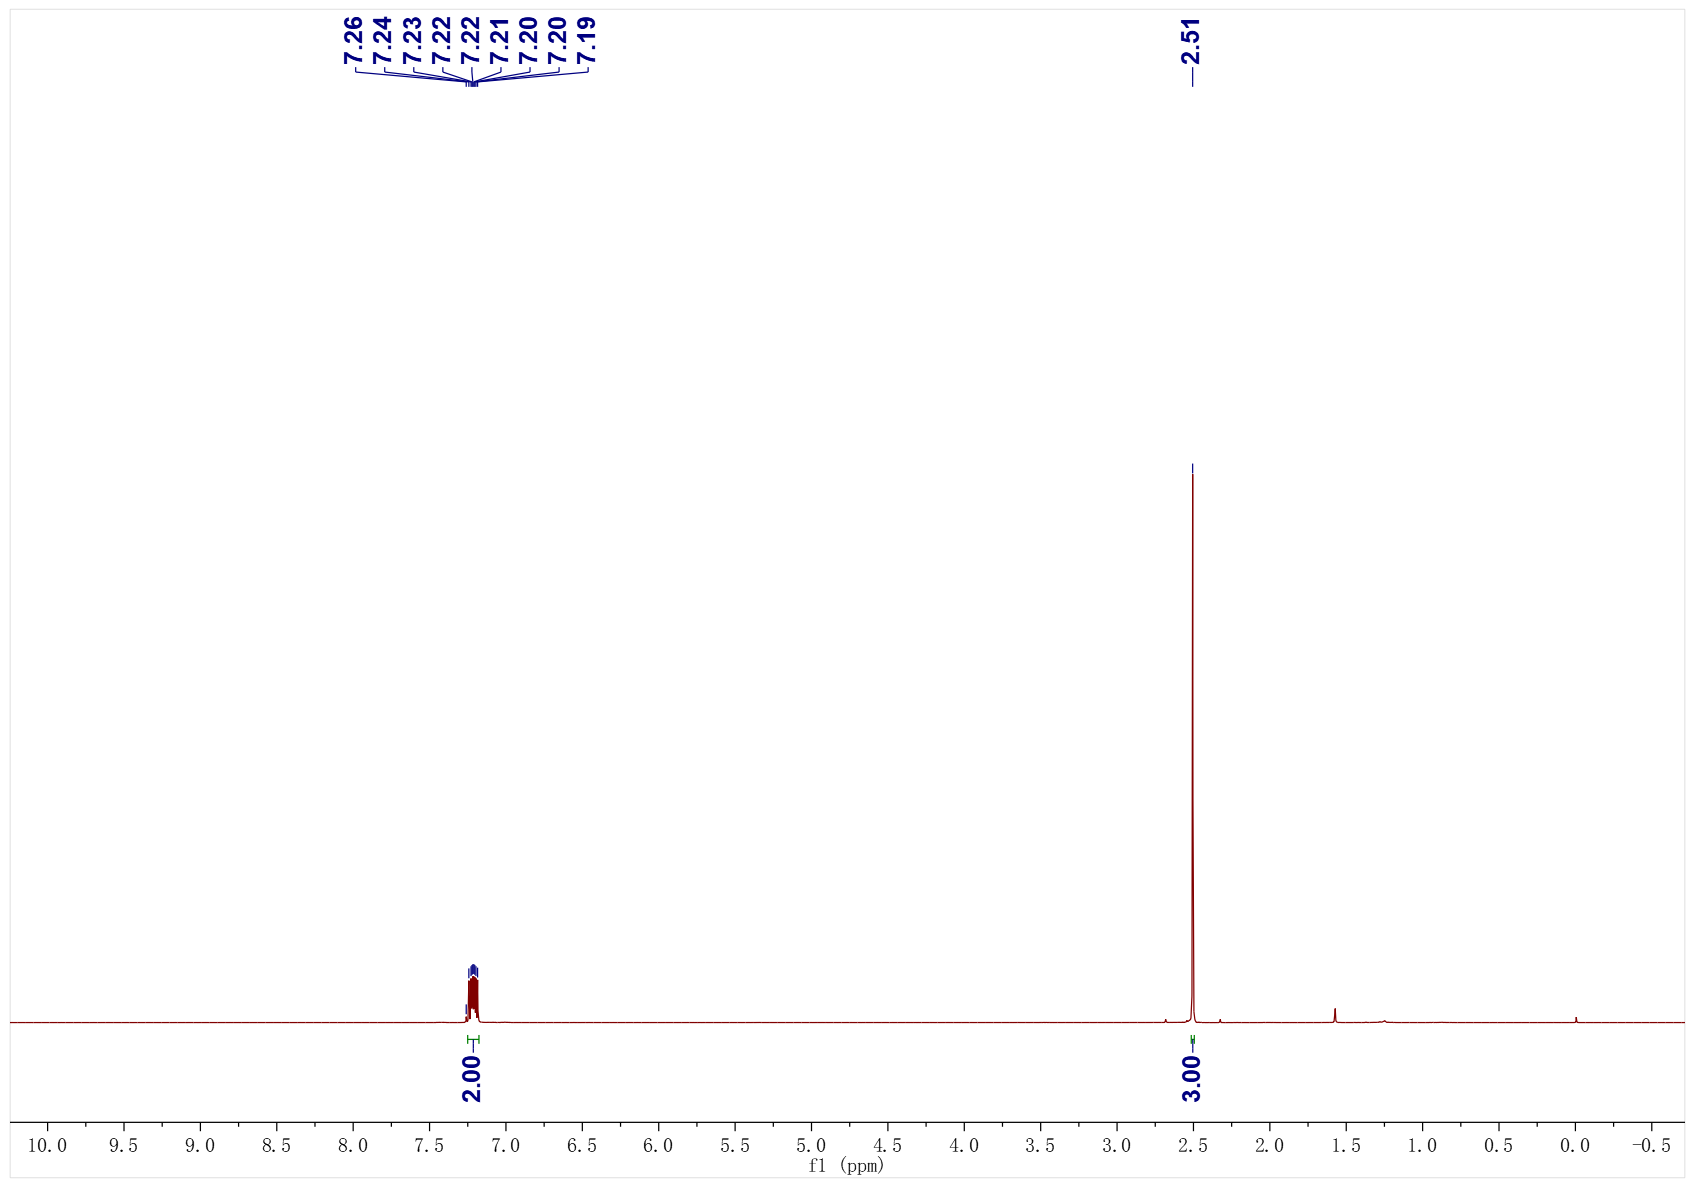

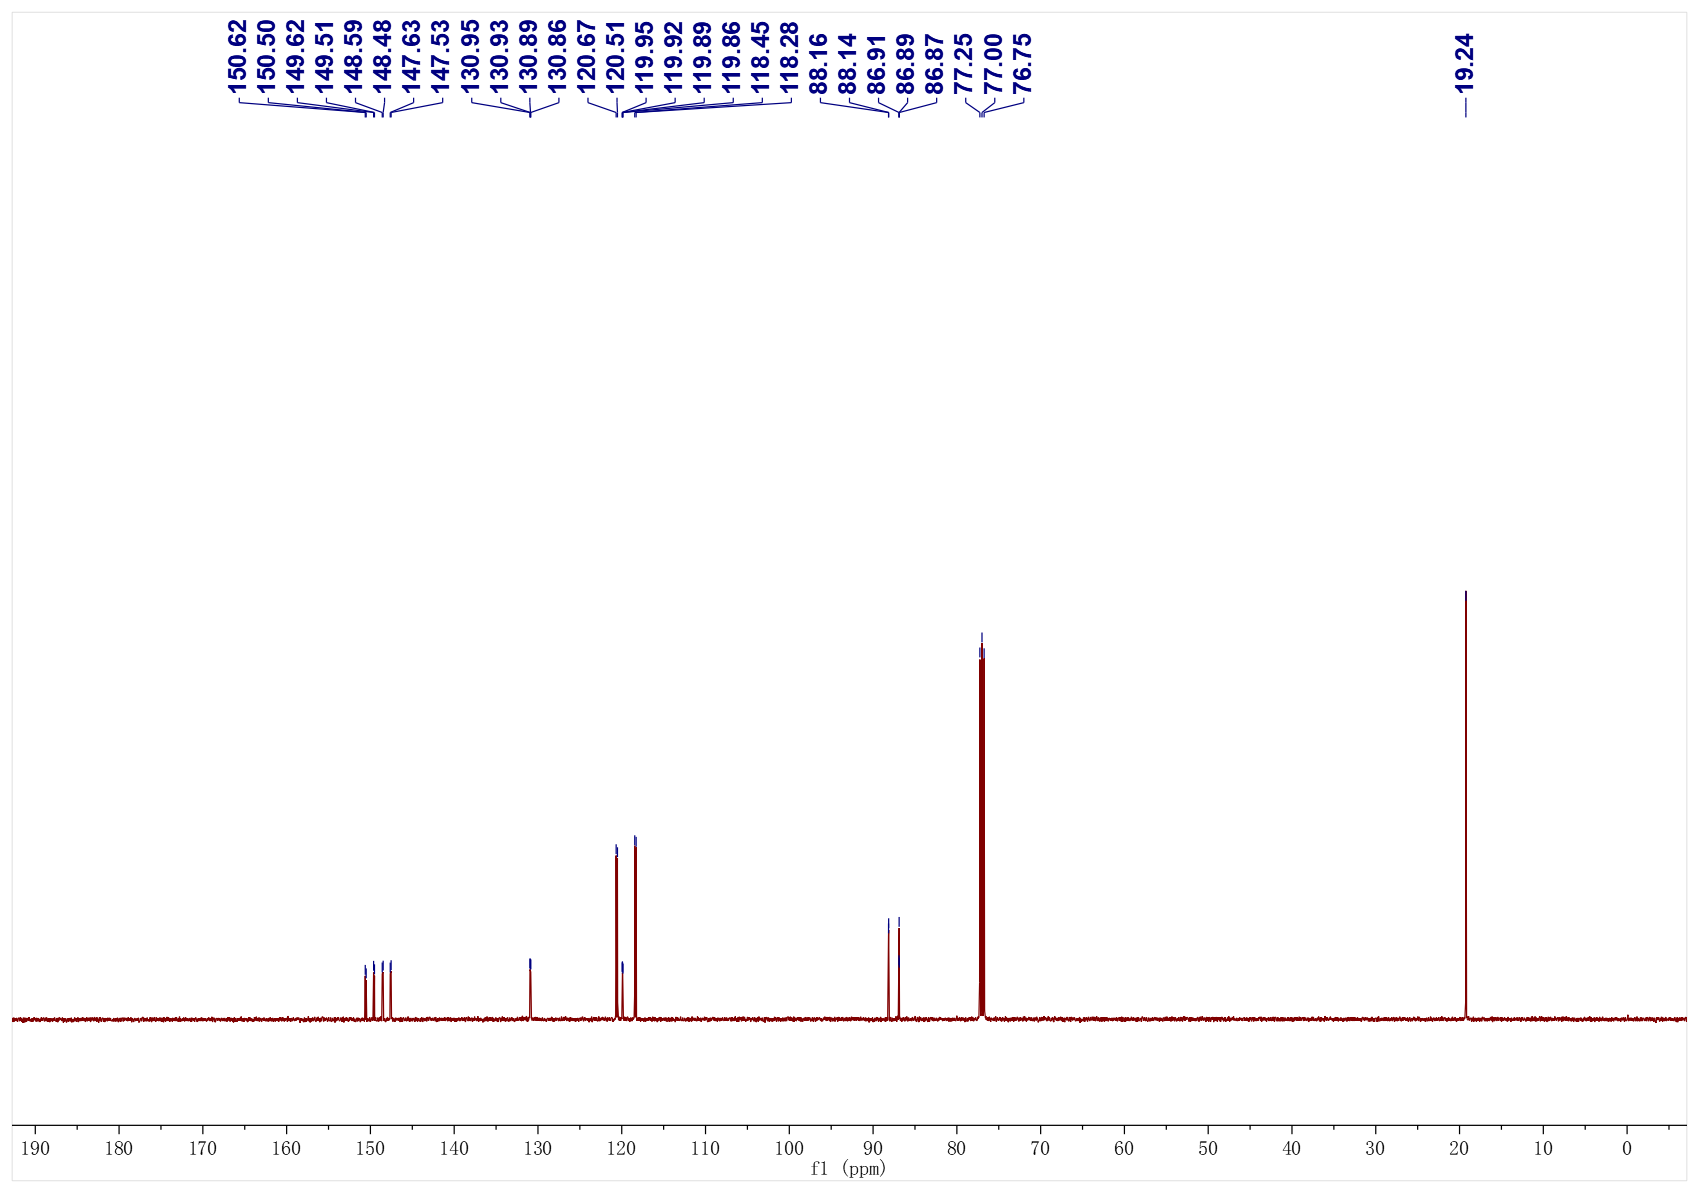


**1bb; 19F NMR (376 MHz, CDCl3)**


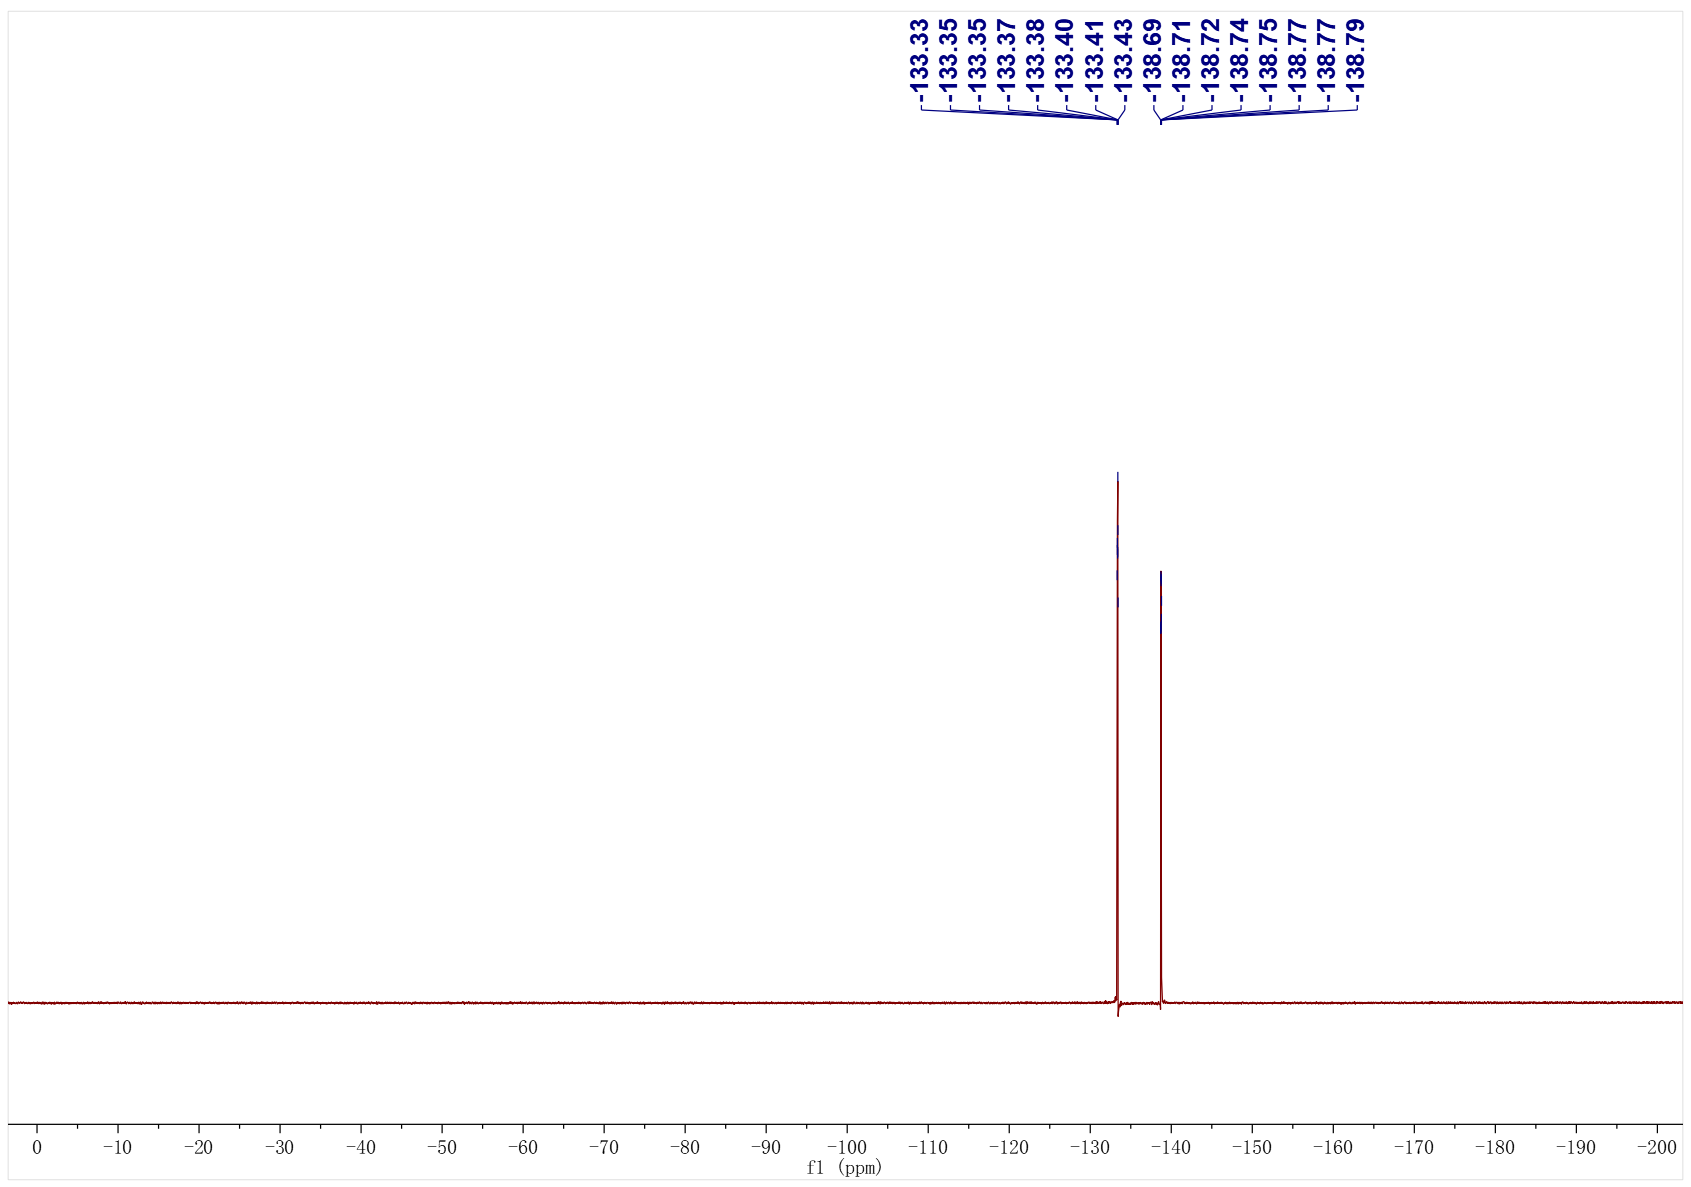


**1bc; 1H NMR (400 MHz, CDCl3); 13C NMR (101 MHz, CDCl3)**


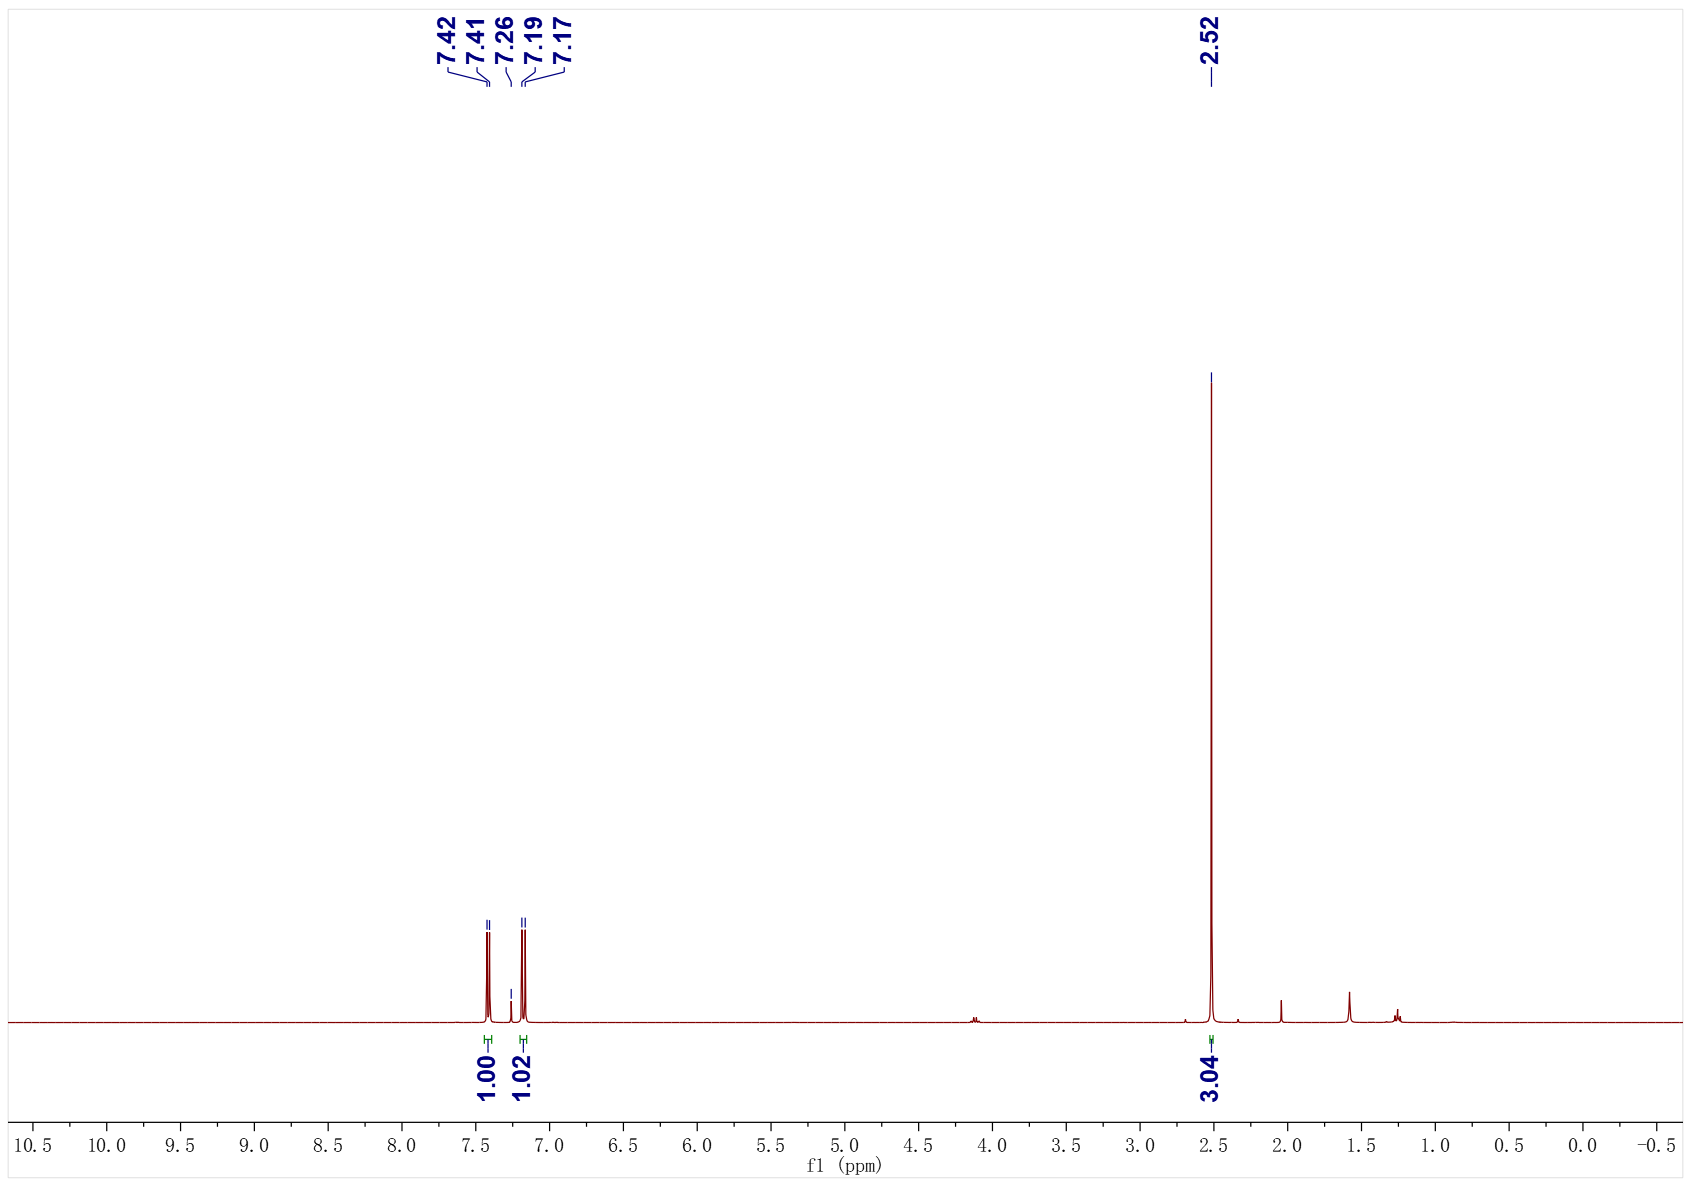

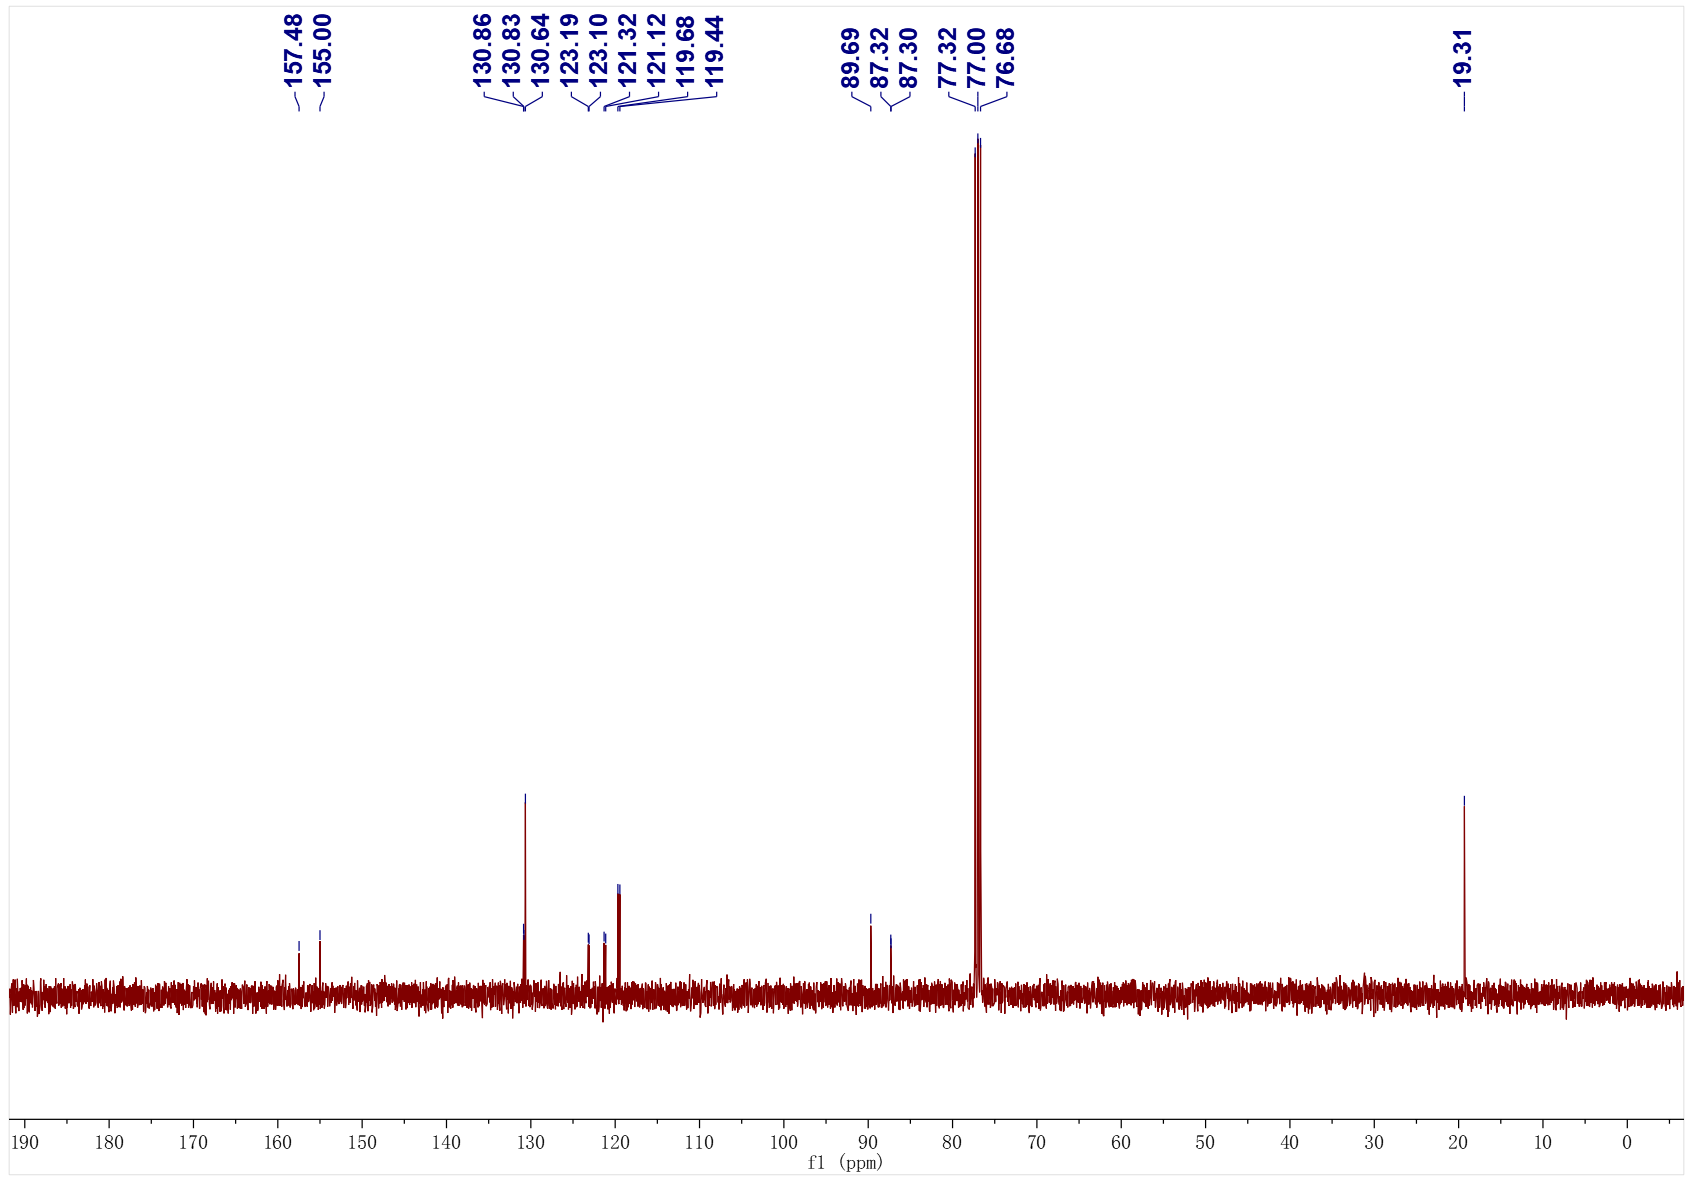


**1bc; 19F NMR (376 MHz, CDCl3)**


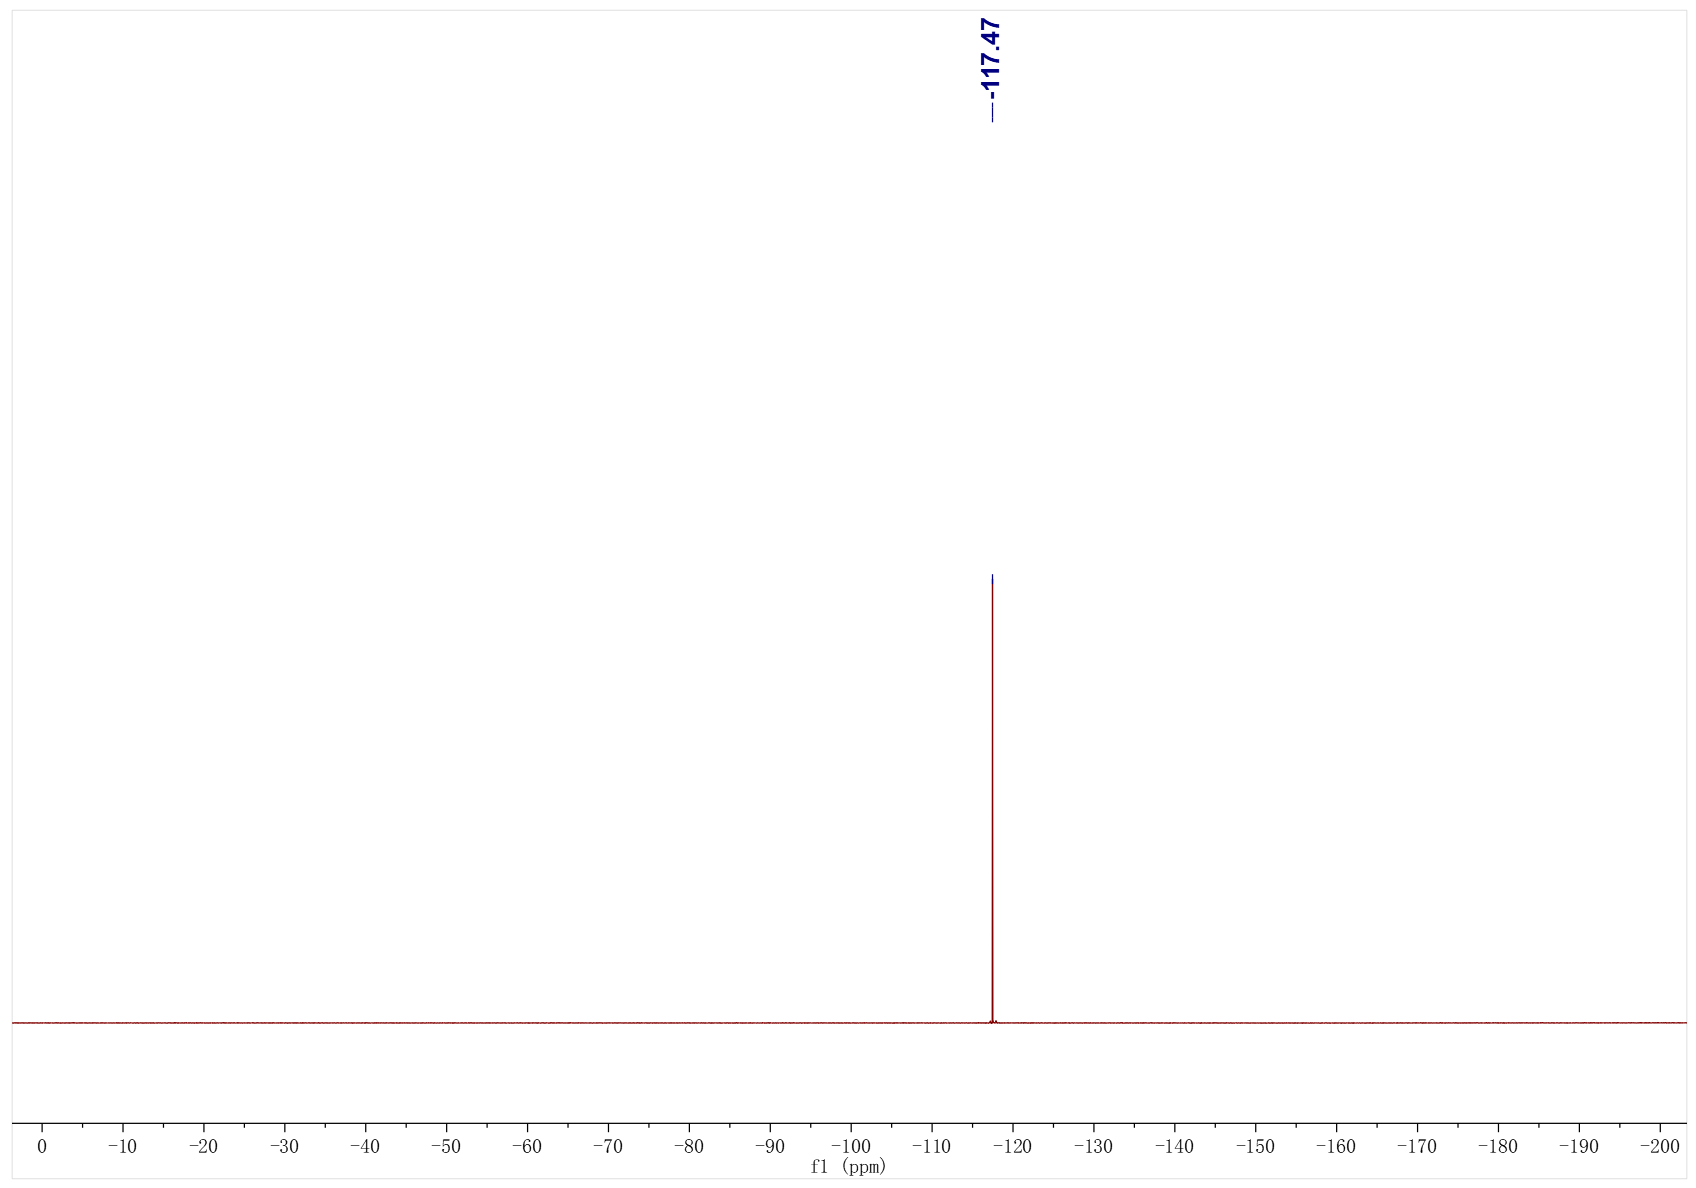


**1be; 1H NMR (500 MHz, CDCl3); 13C NMR (126 MHz, CDCl3)**


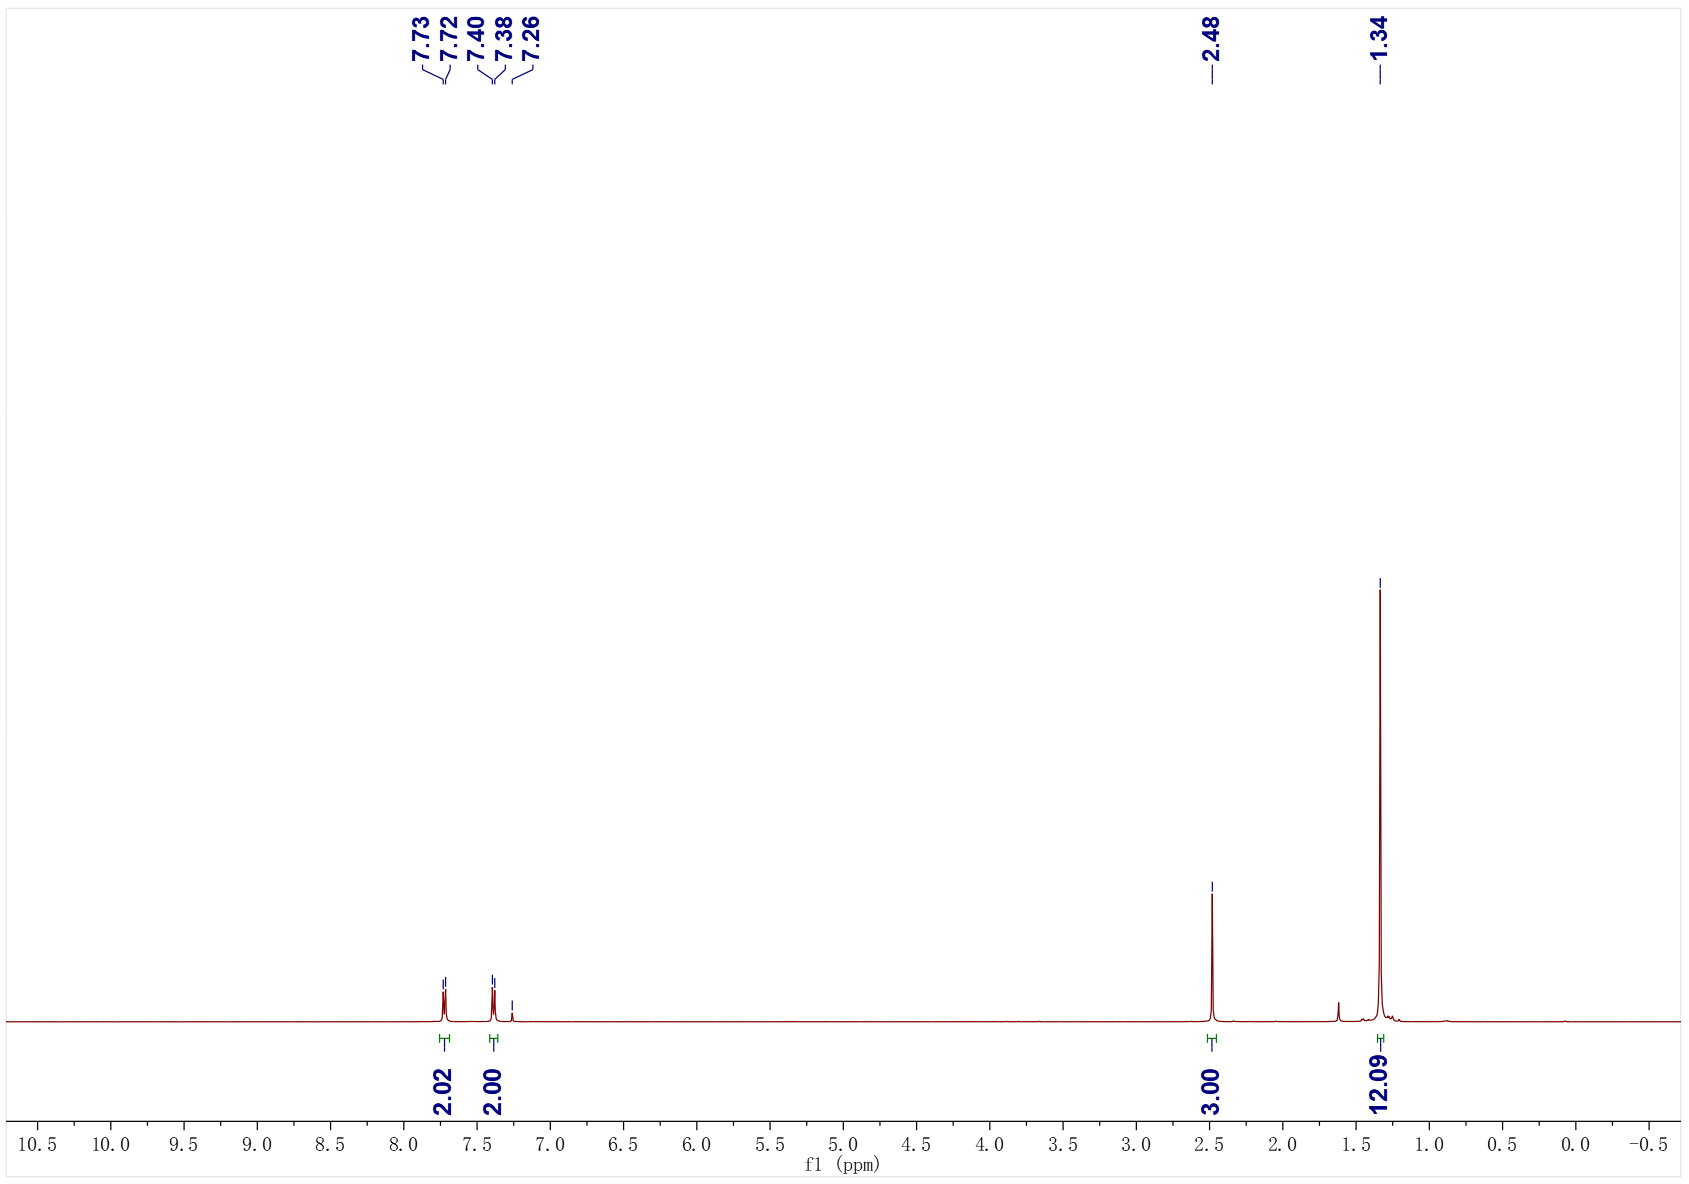

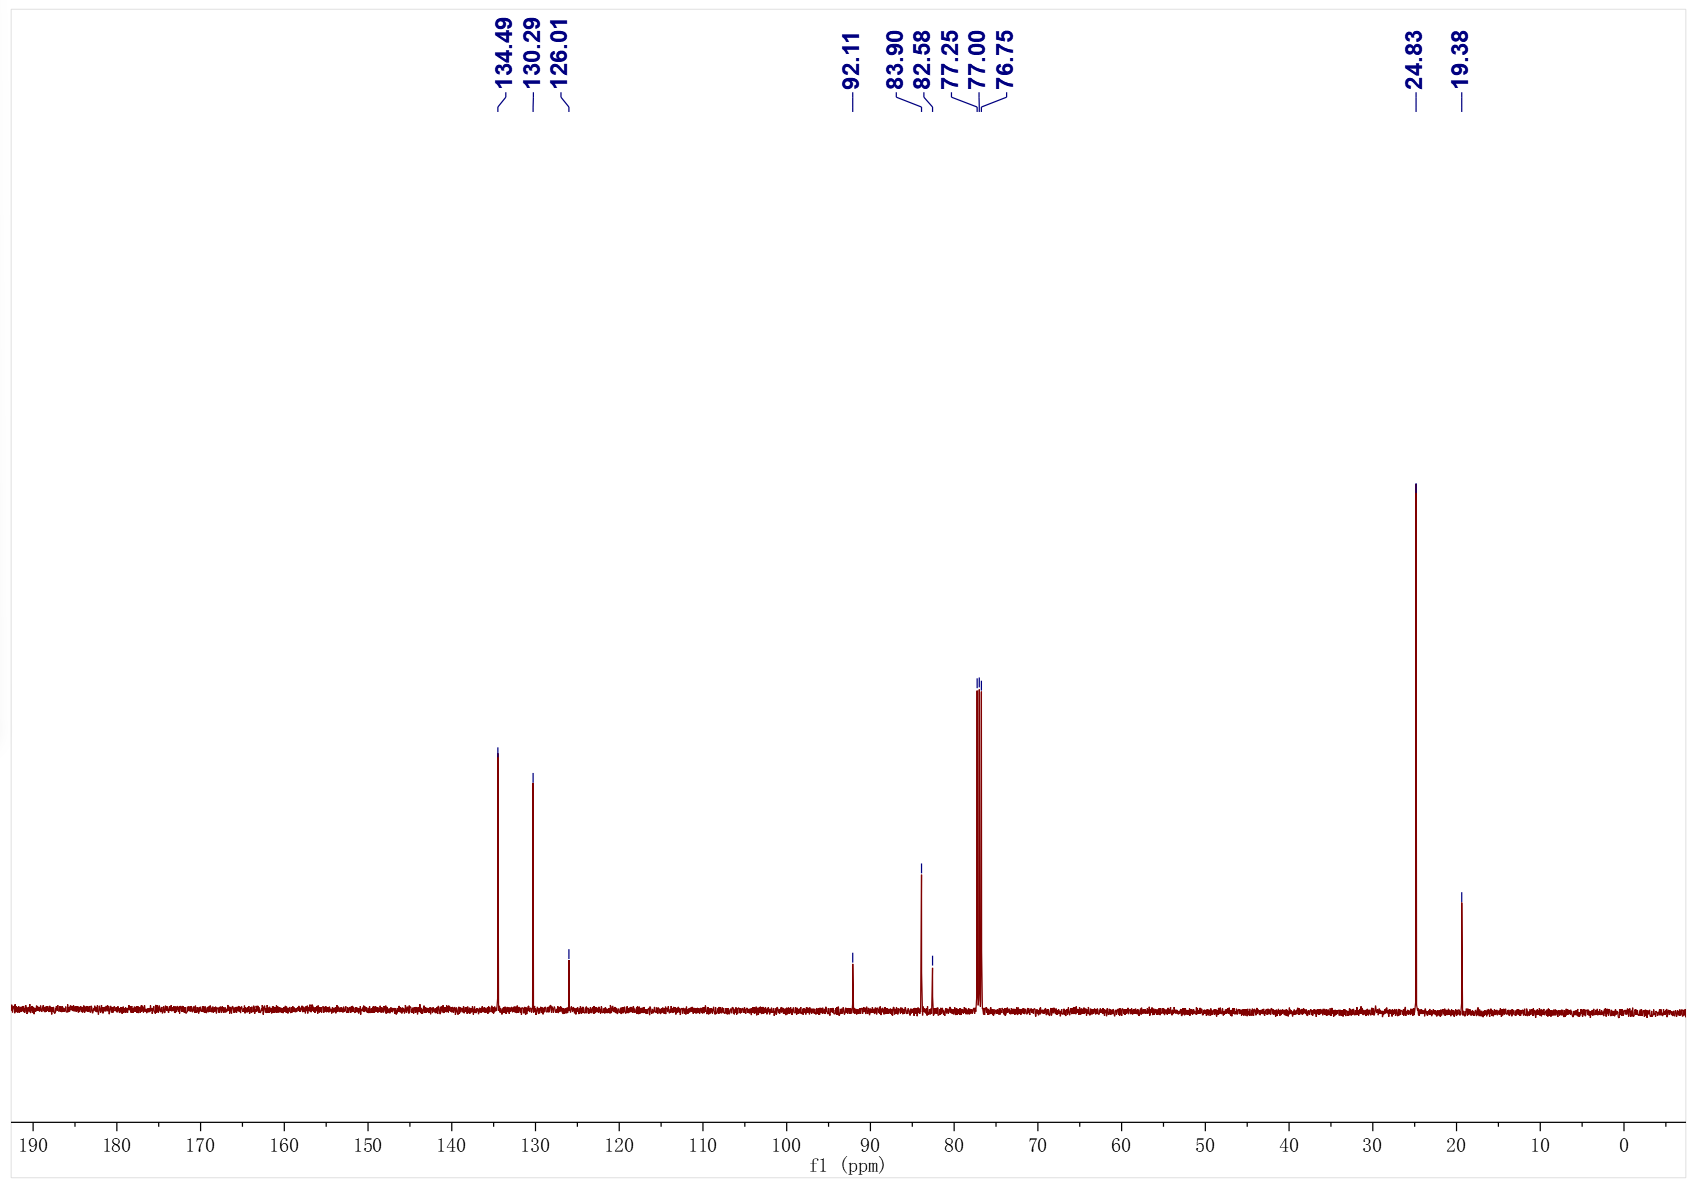


**3a; 1H NMR (500 MHz, CDCl3); 13C NMR (126 MHz, CDCl3)**


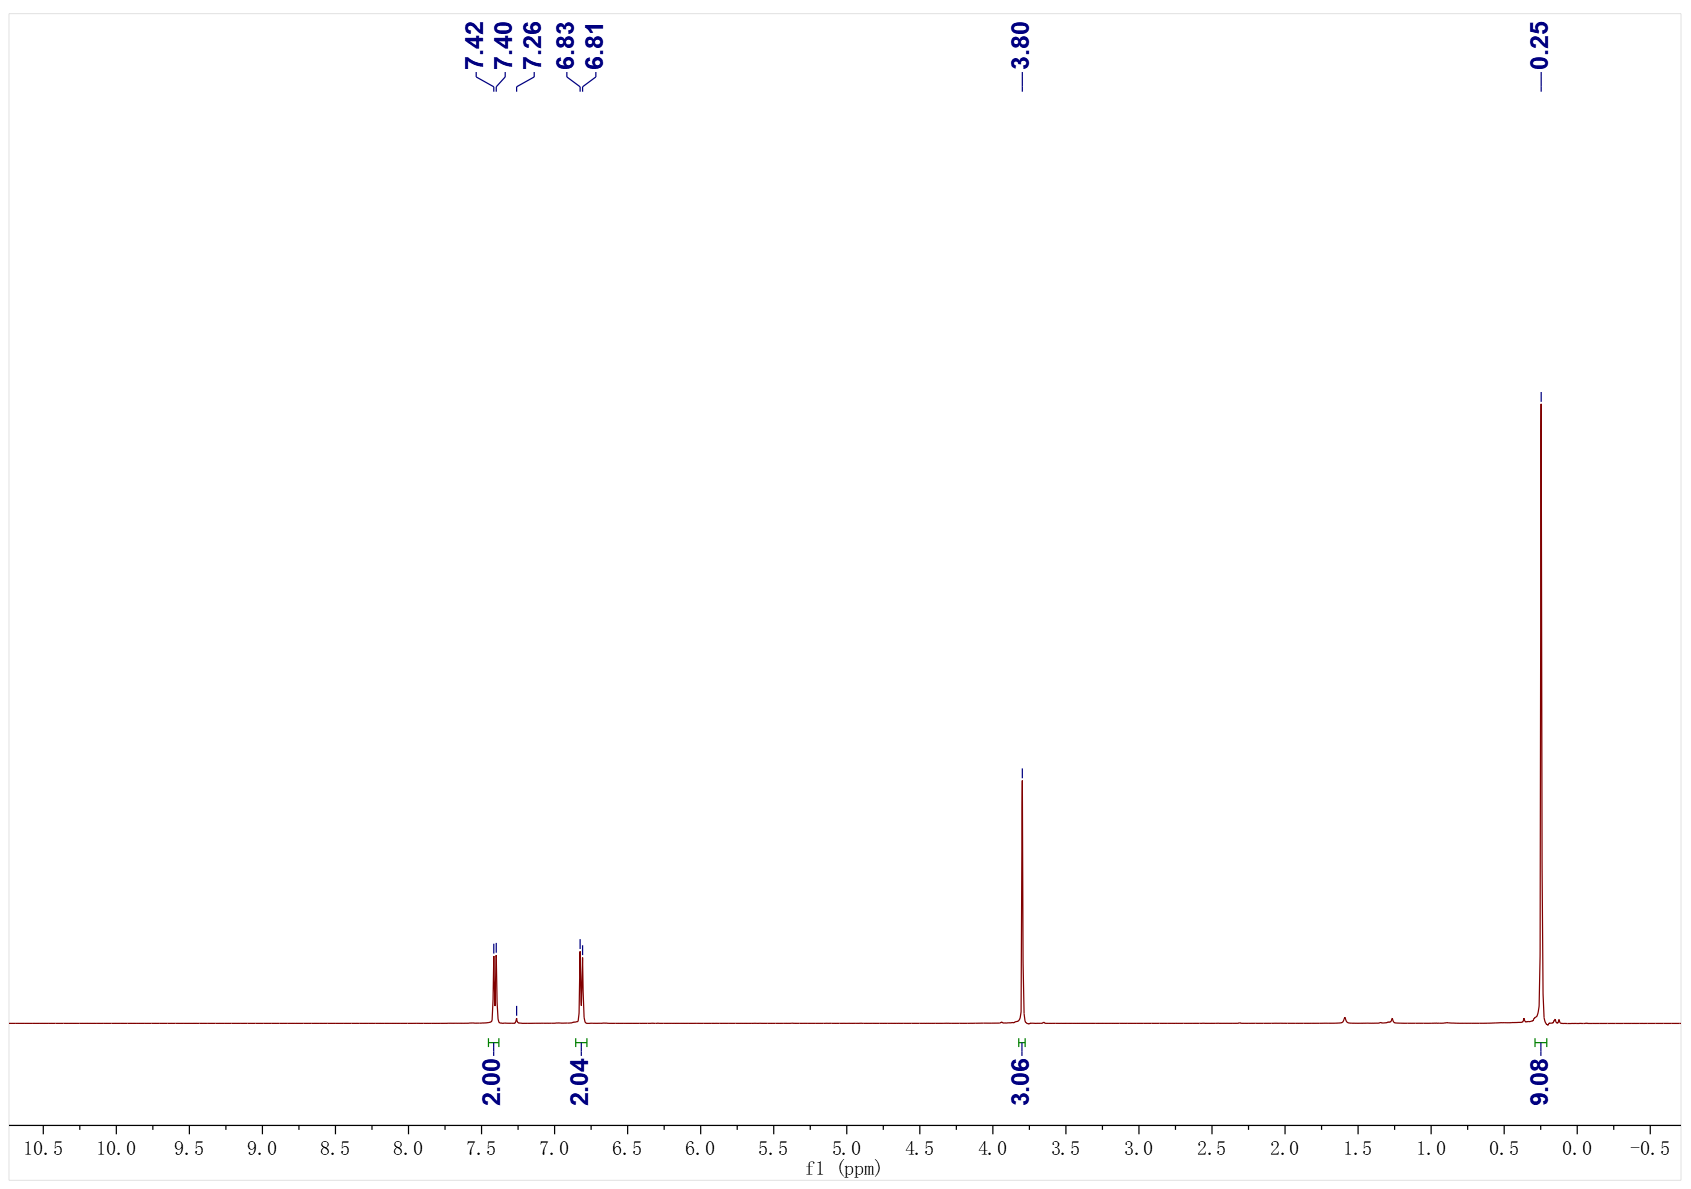


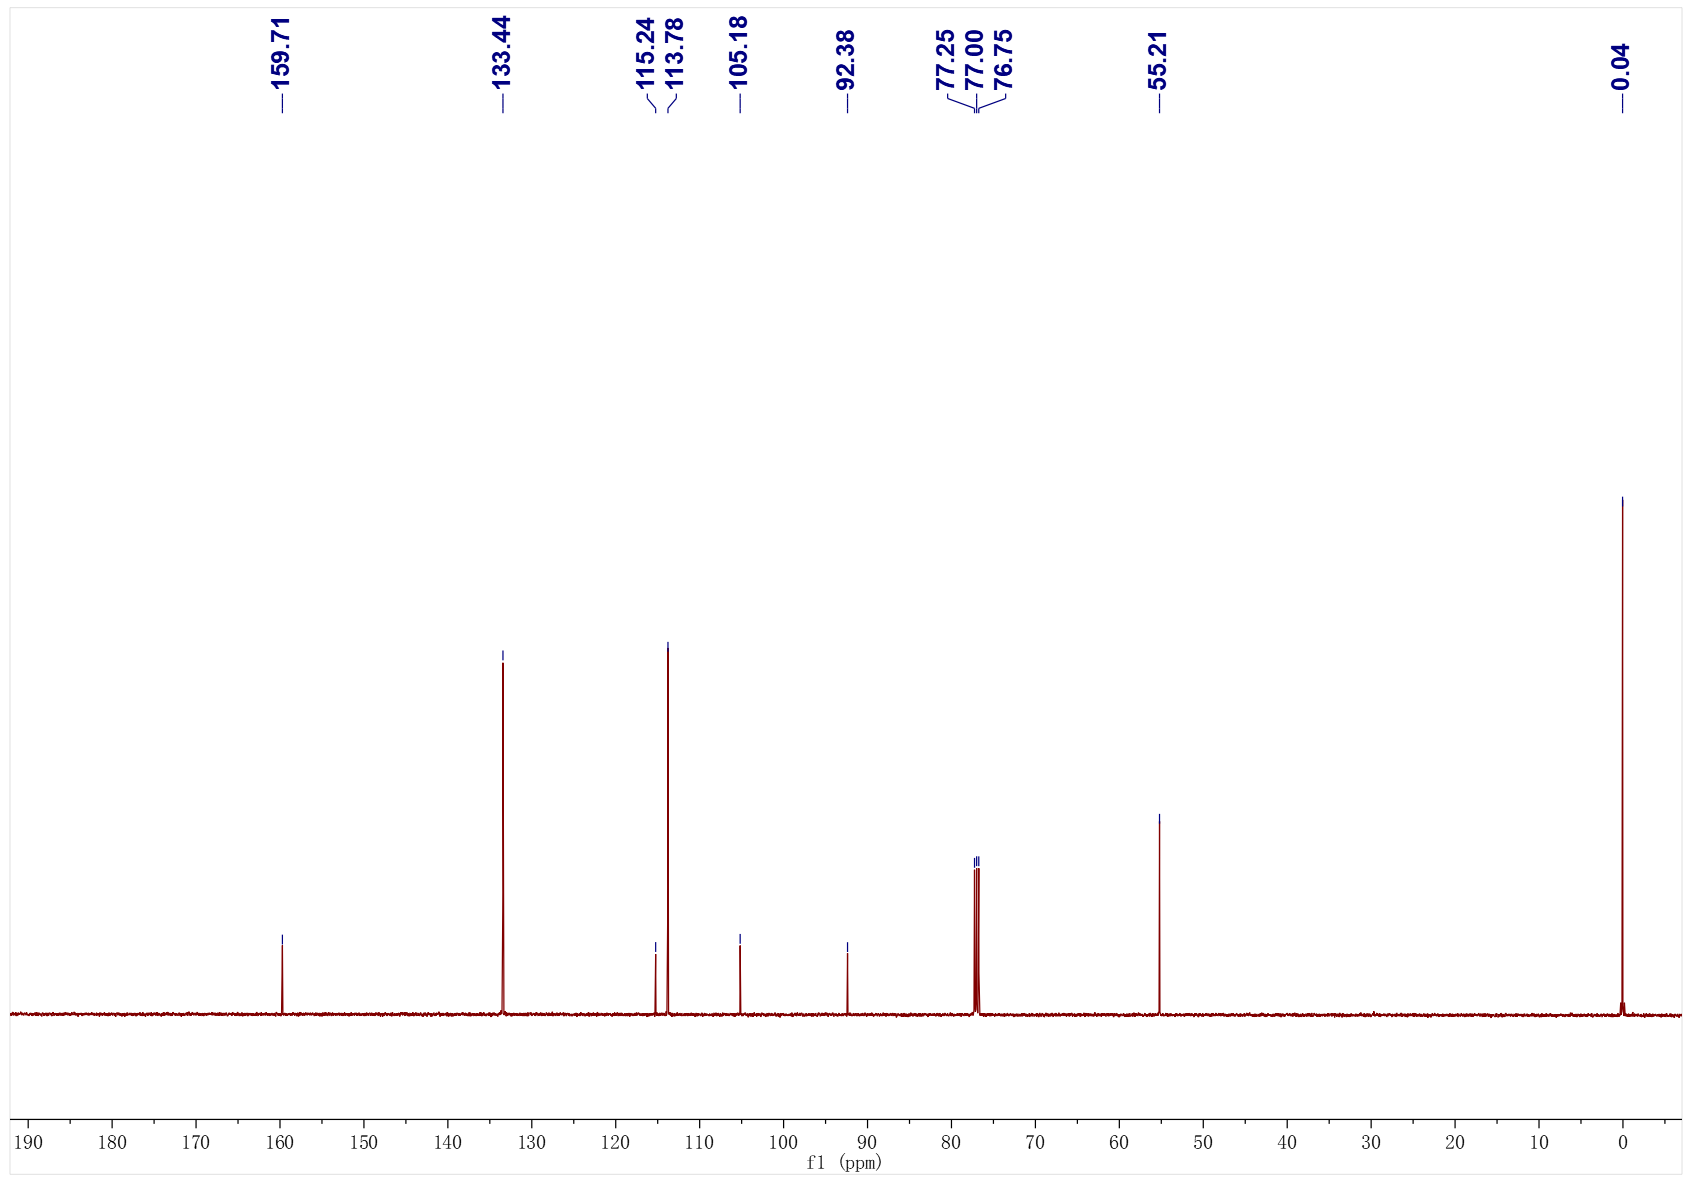


**3b; 1H NMR (400 MHz, CDCl3); 13C NMR (126 MHz, CDCl3)**


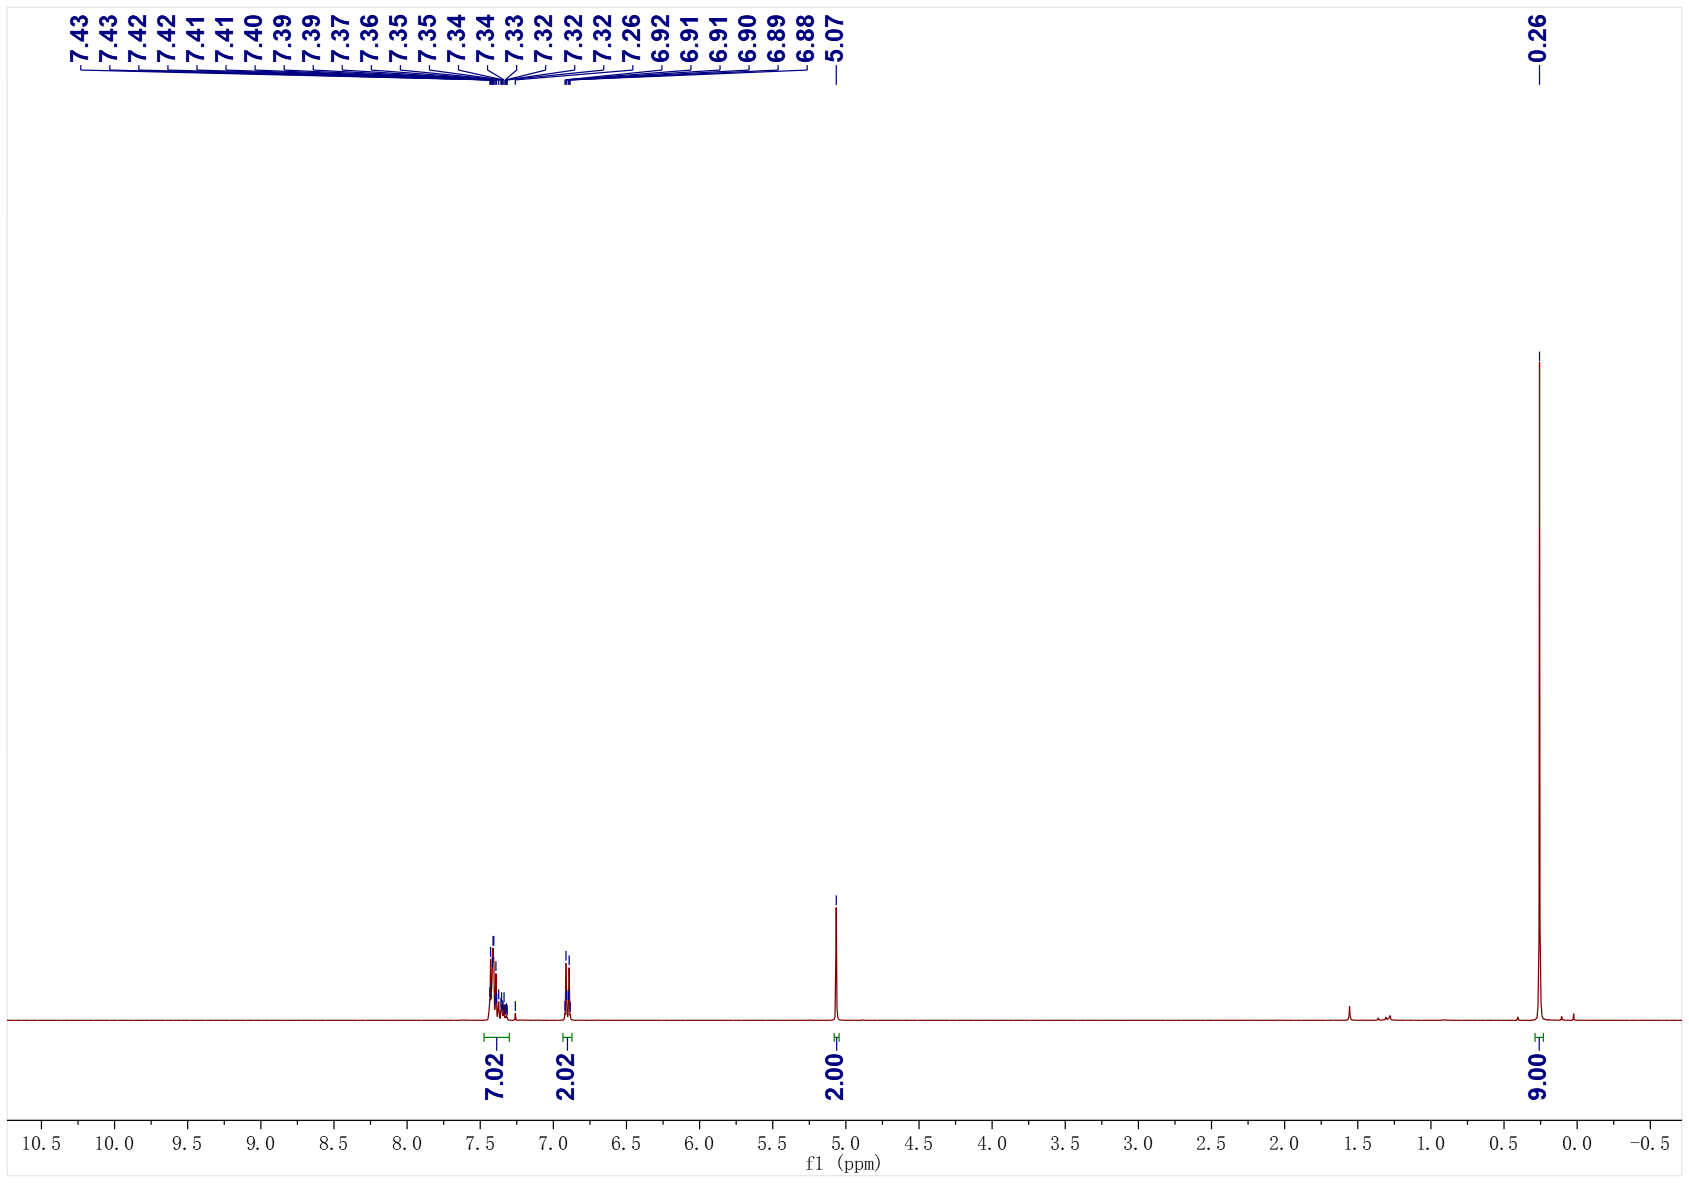


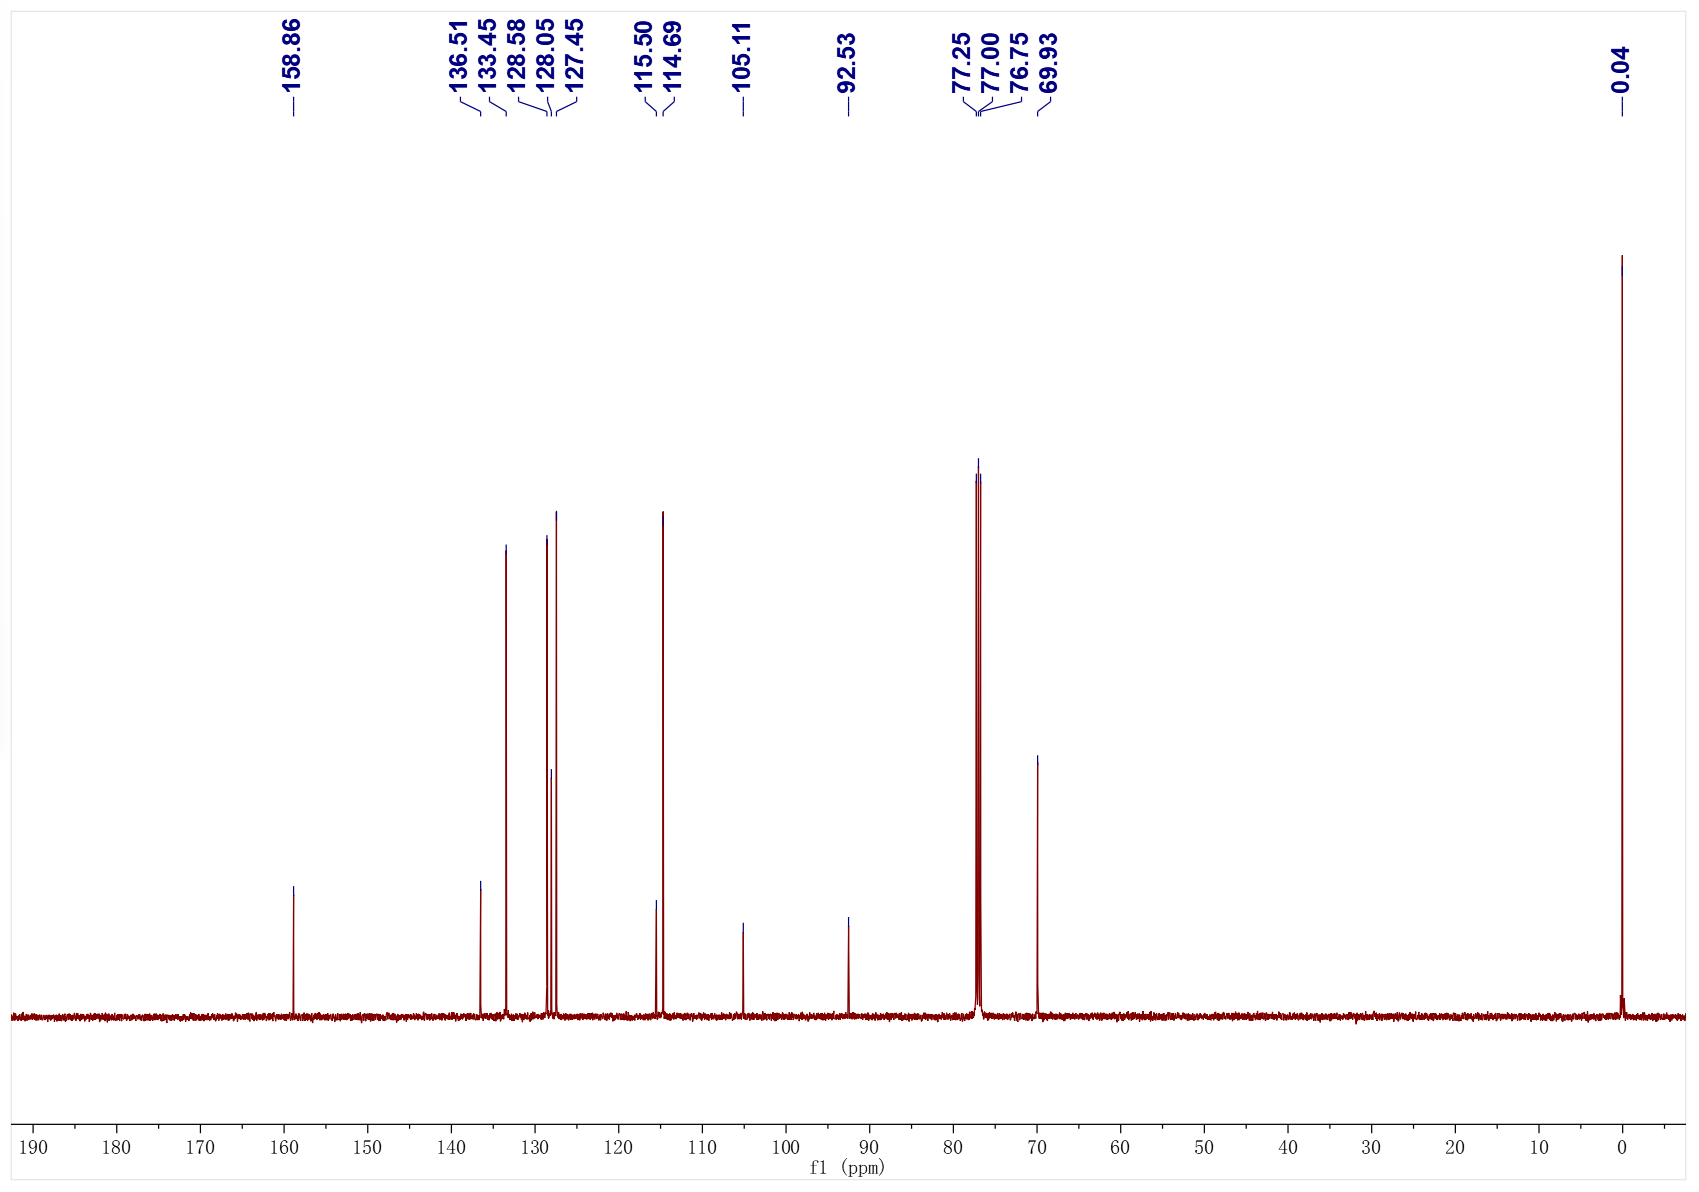
**3c; 1H NMR (400 MHz, CDCl3); 13C NMR (101 MHz, CDCl3)**


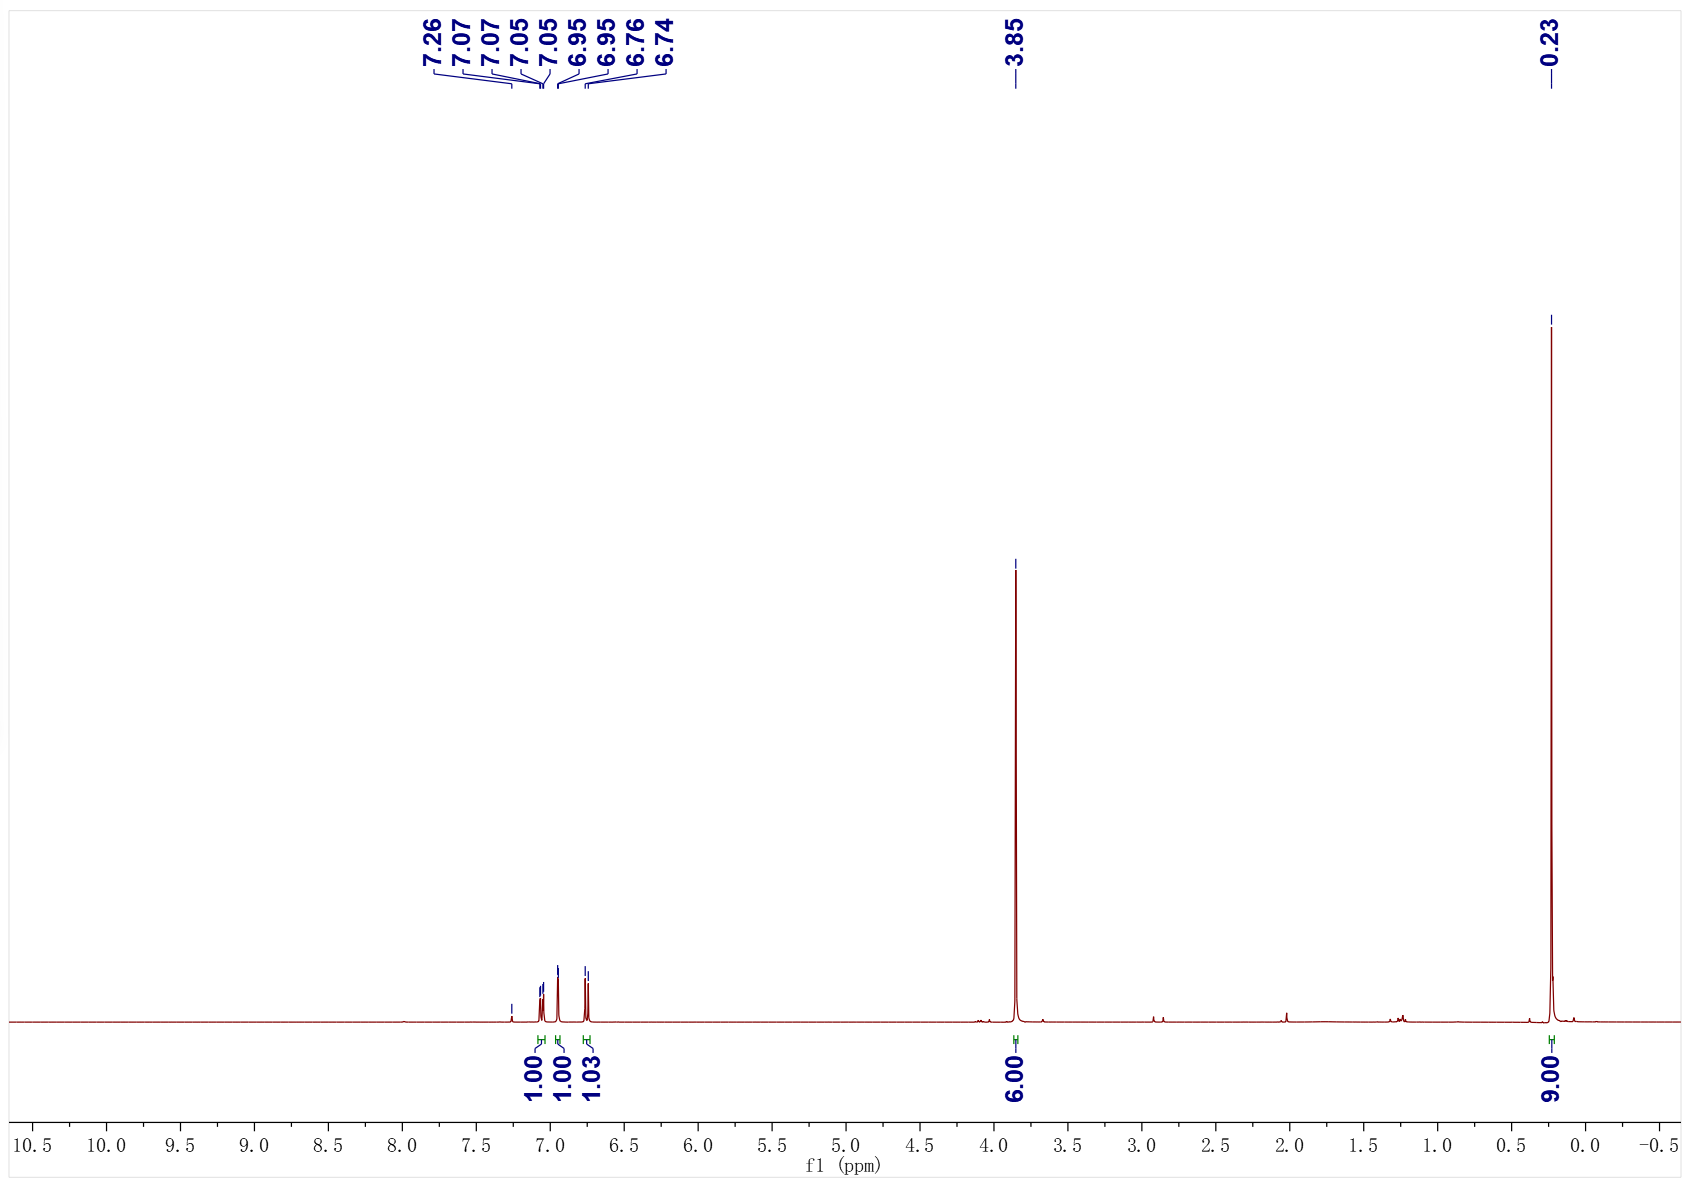

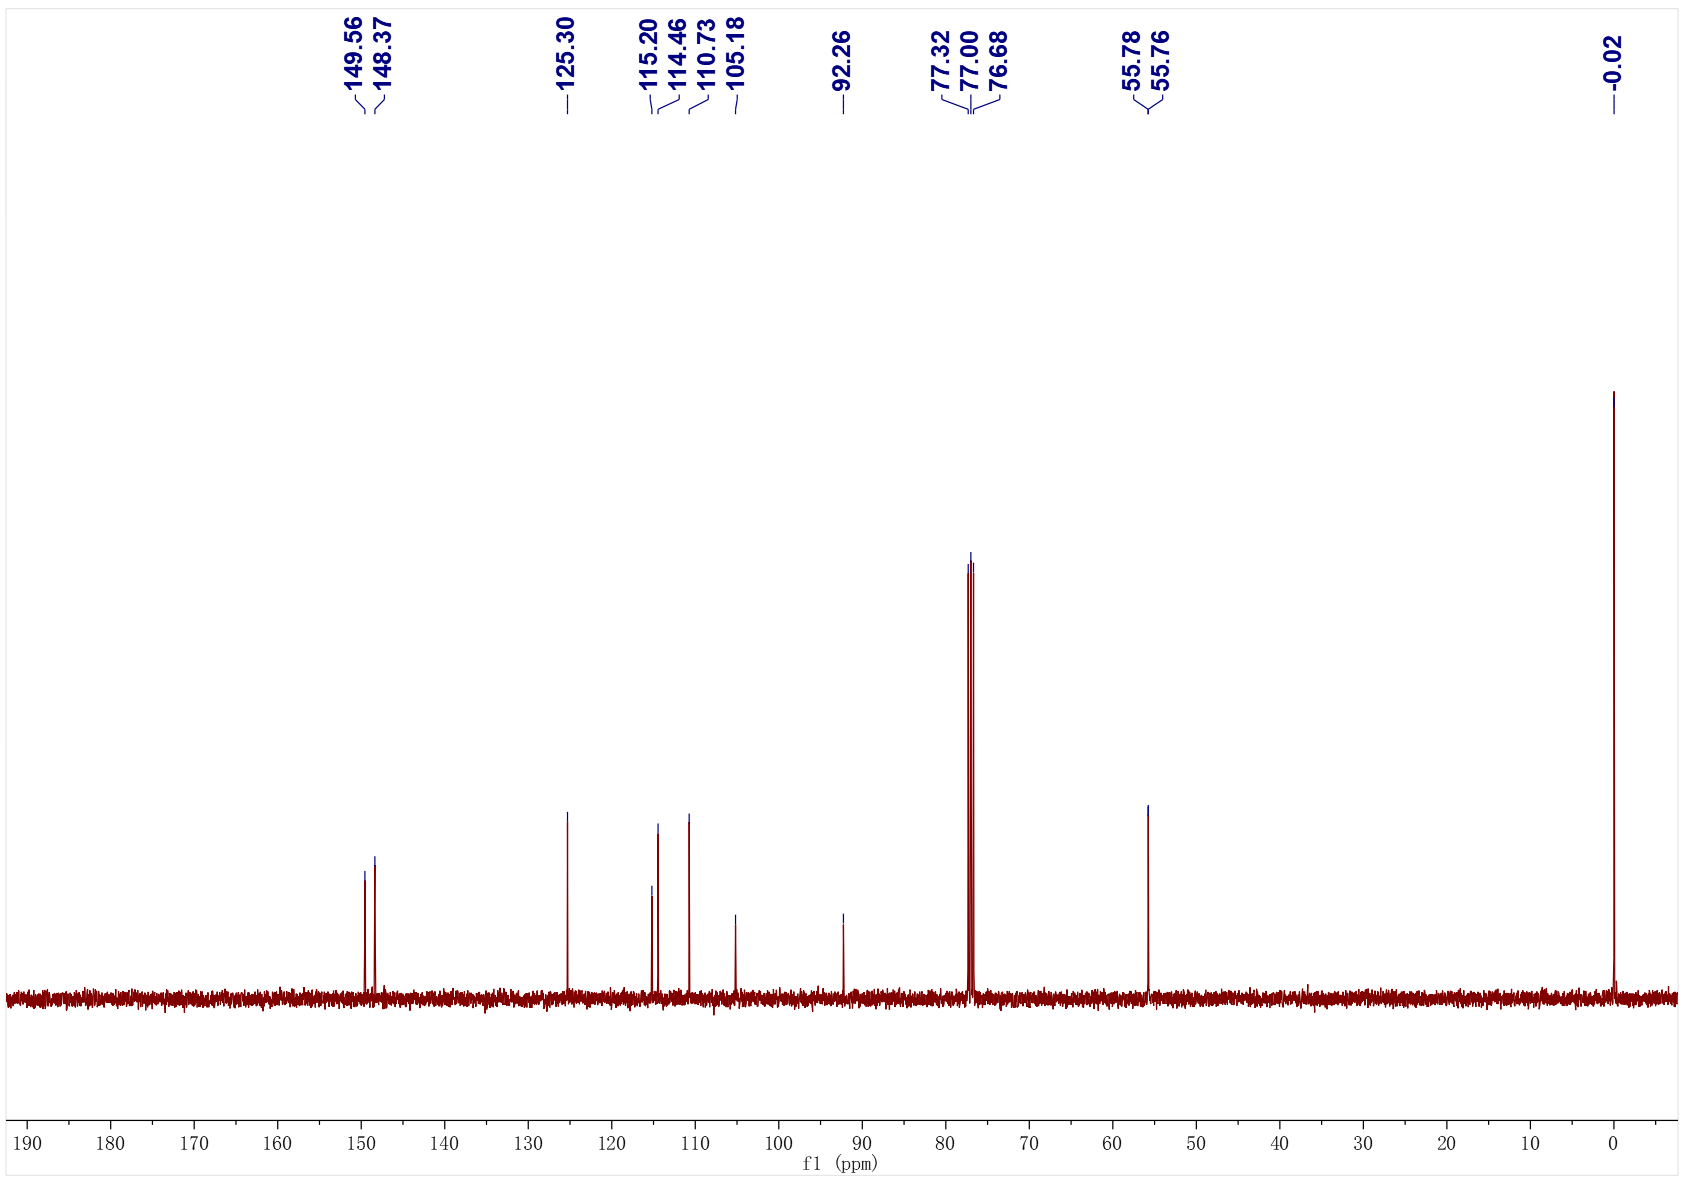


**3d; 1H NMR (500 MHz, CDCl3); 13C NMR (126 MHz, CDCl3)**


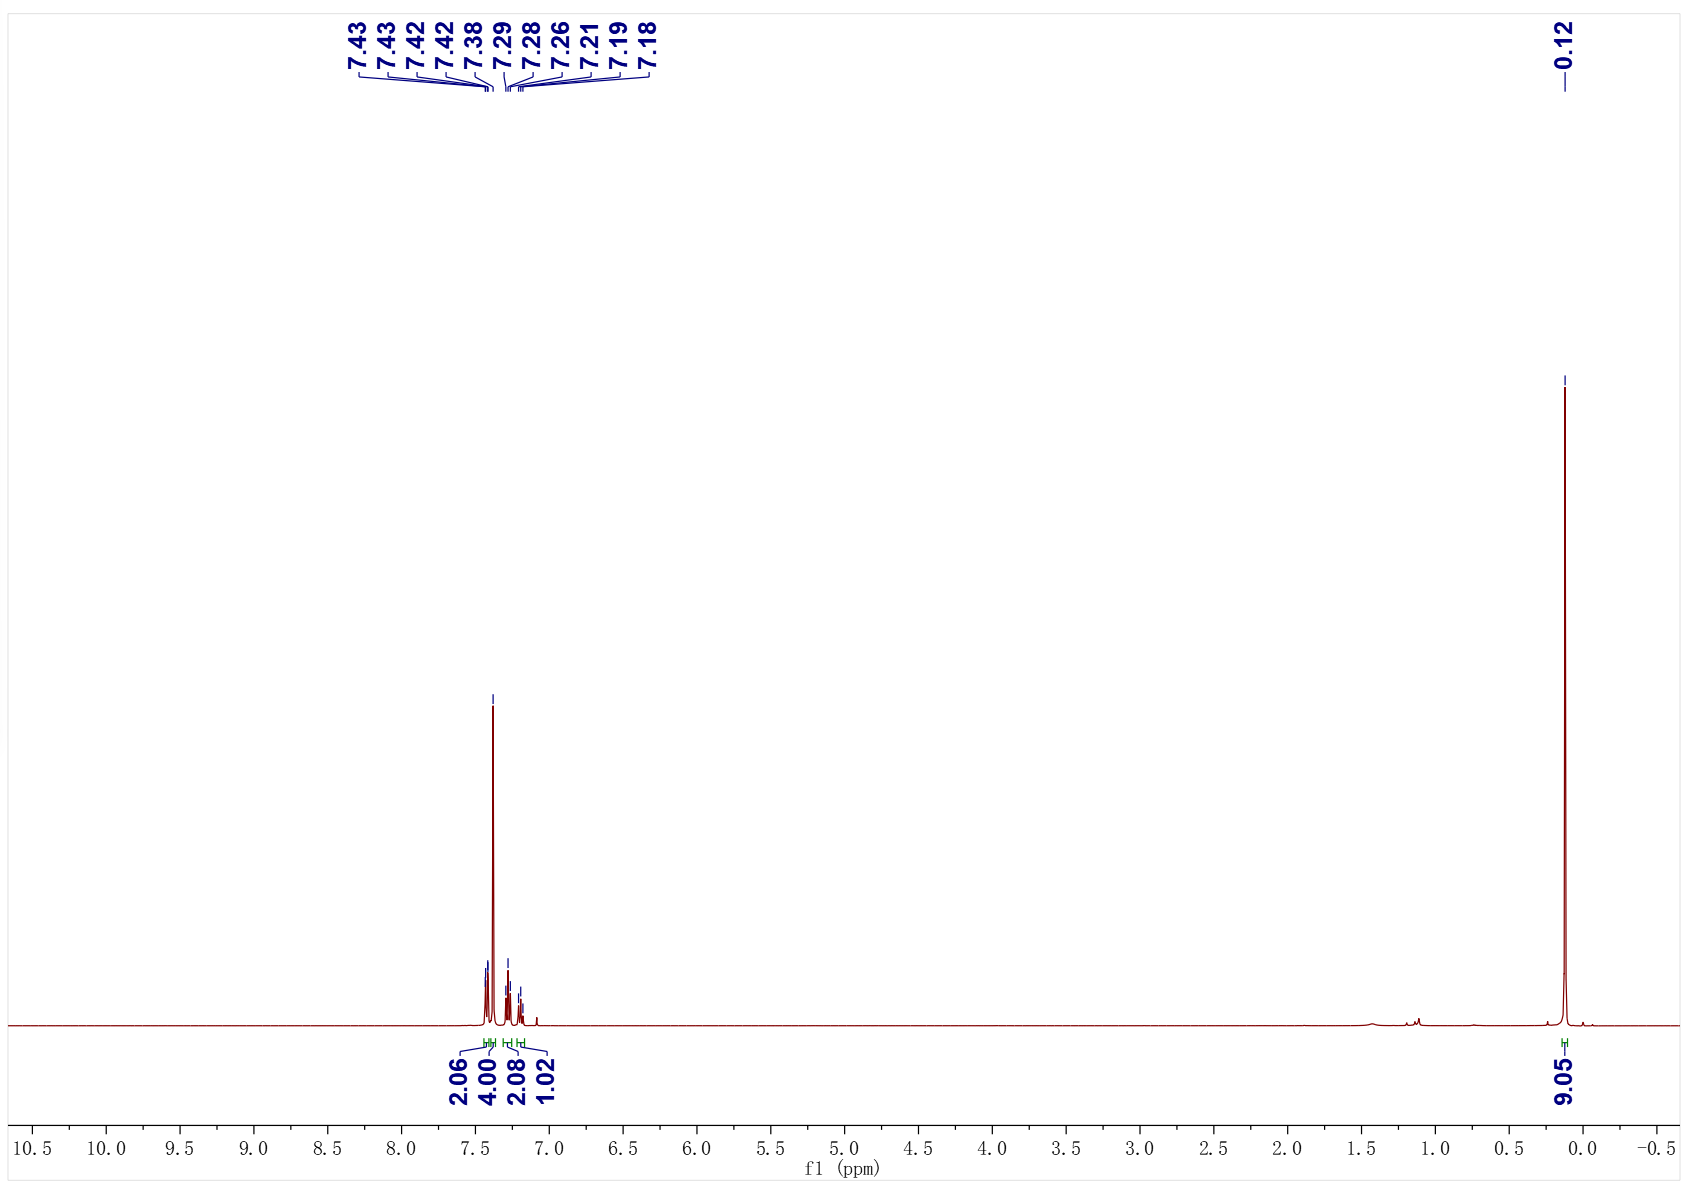


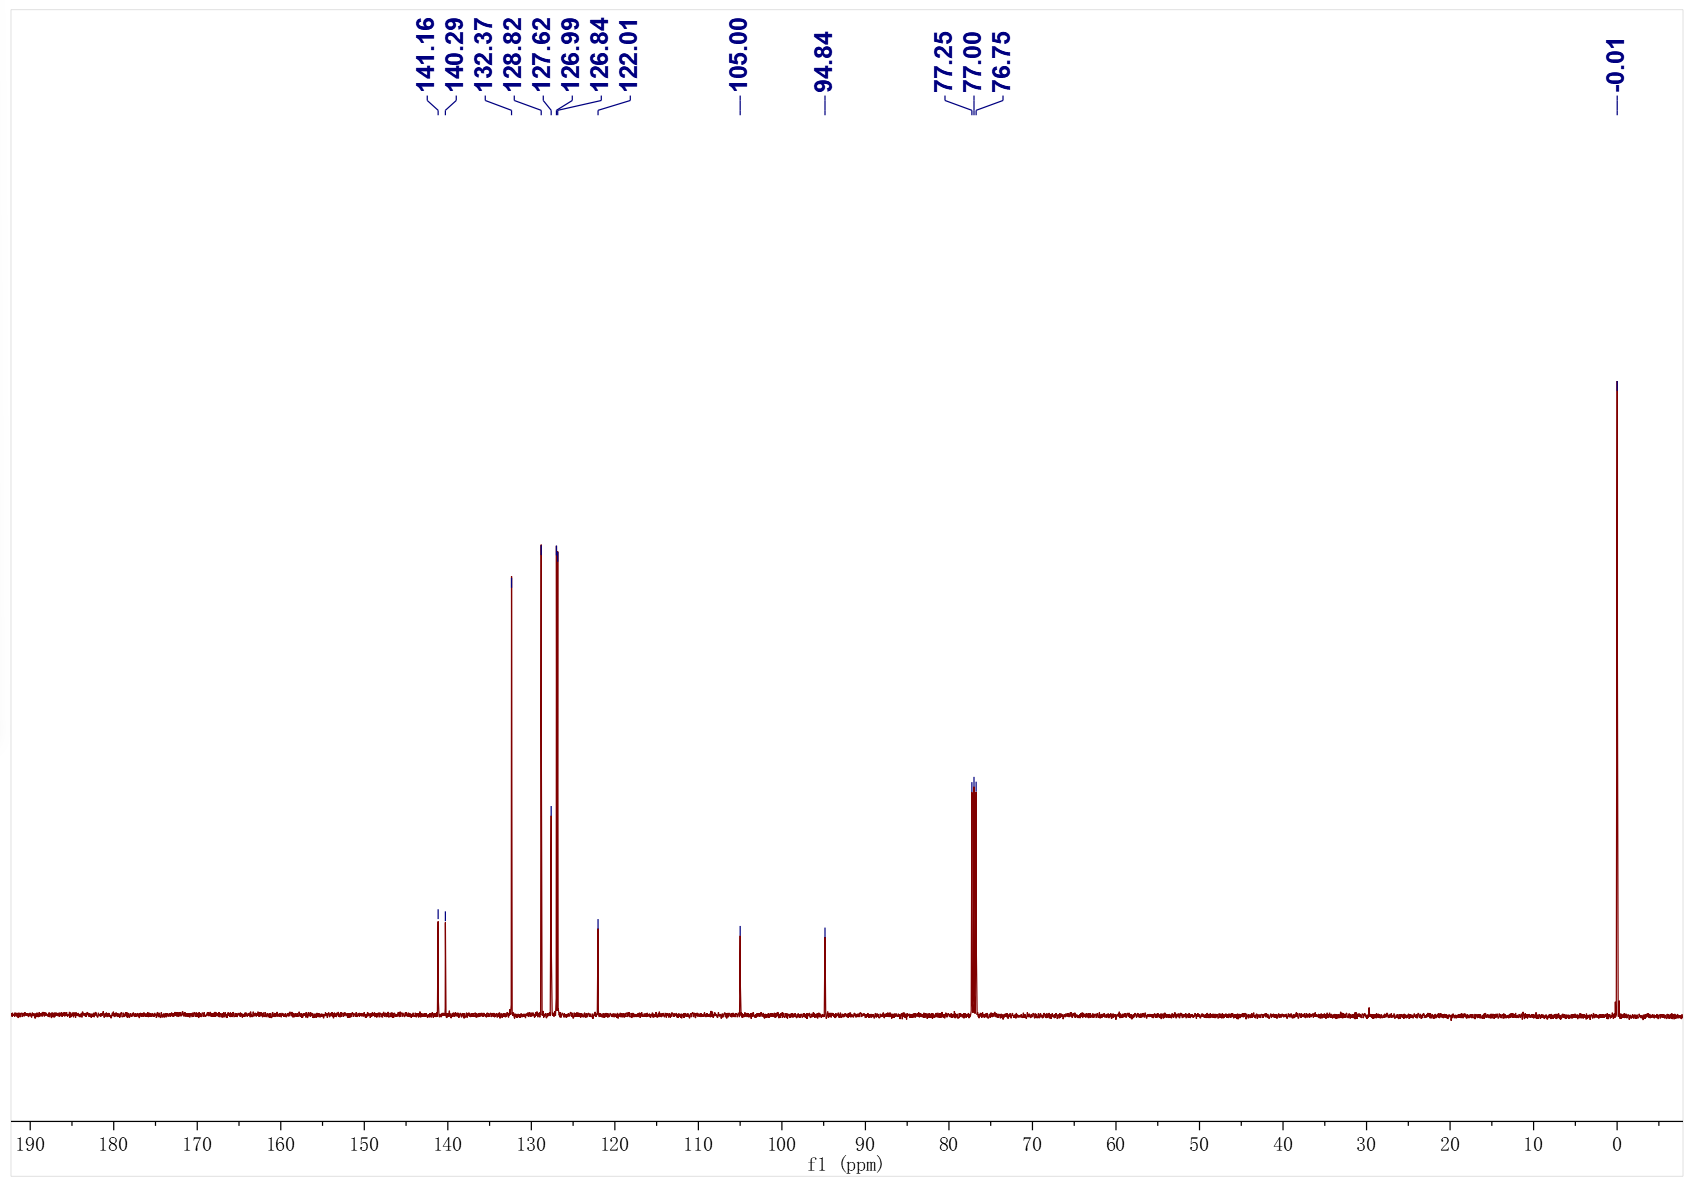


**3e; 1H NMR (500 MHz, CDCl3); 13C NMR (126 MHz, CDCl3)**


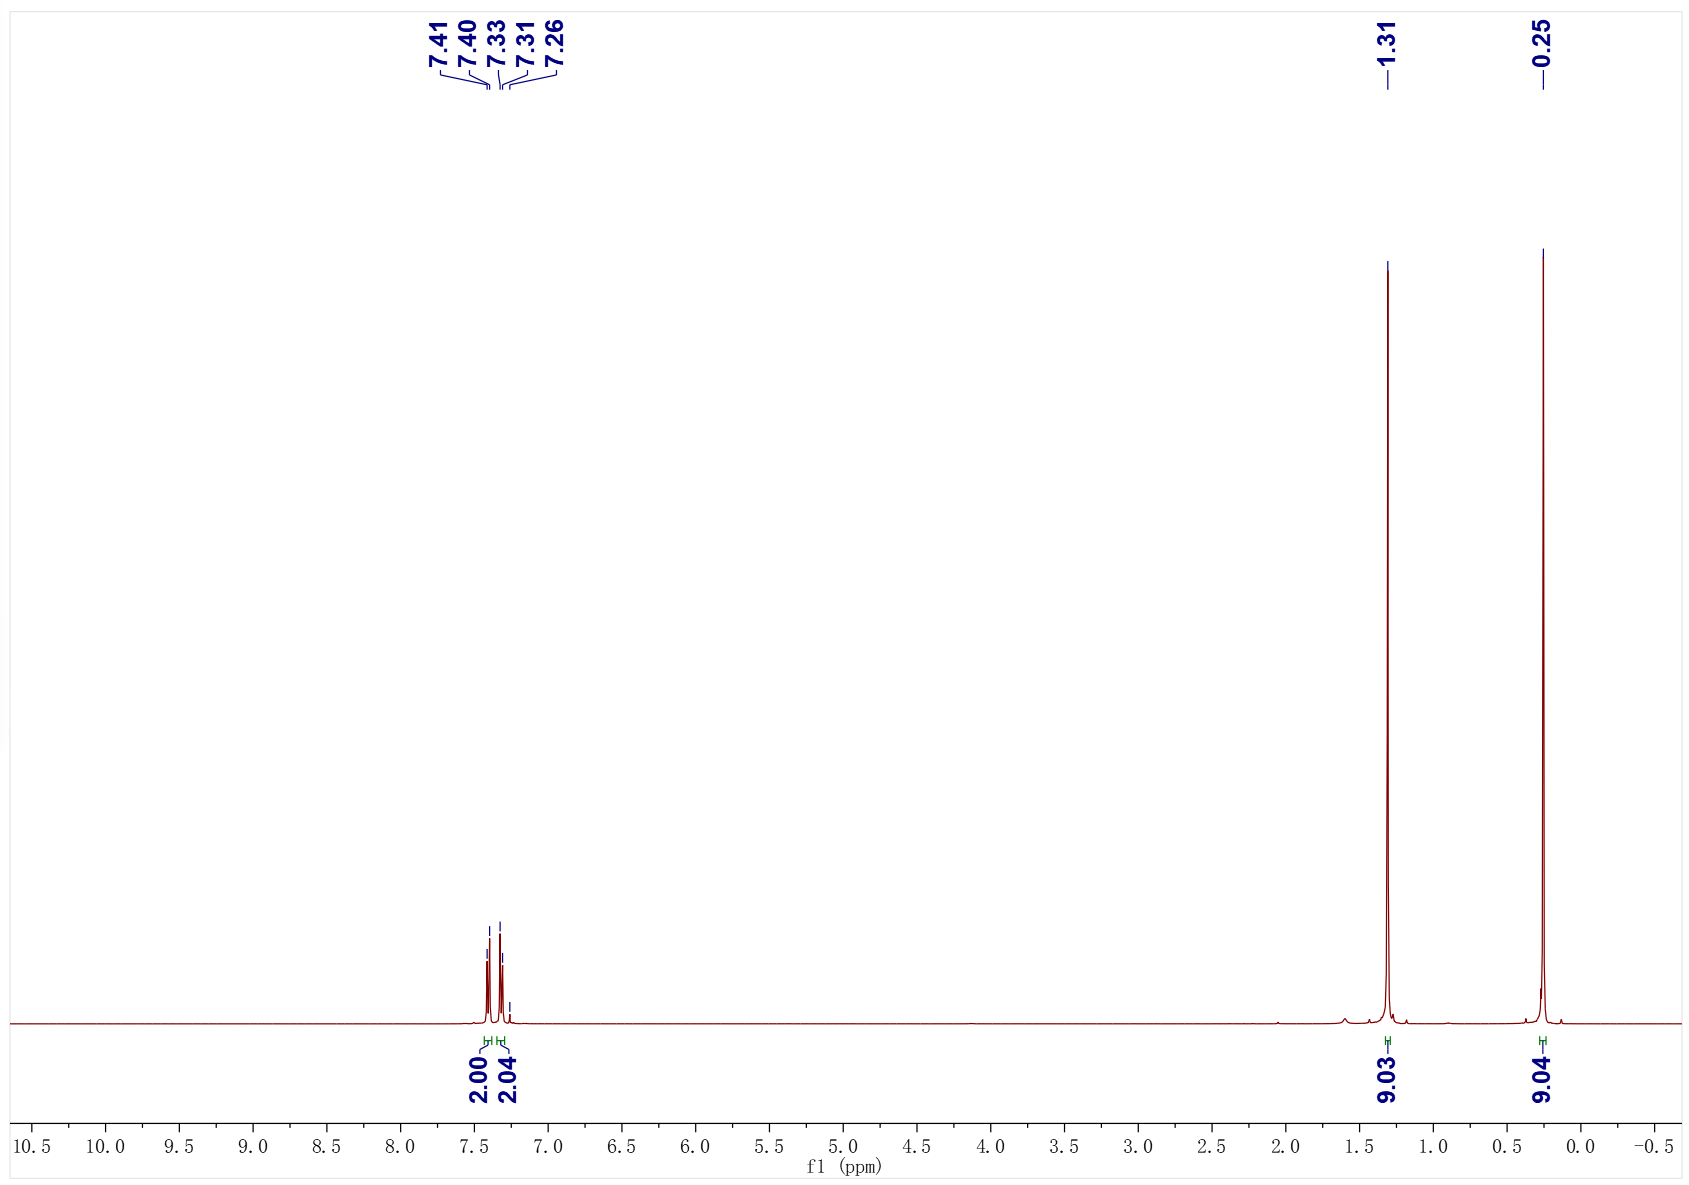

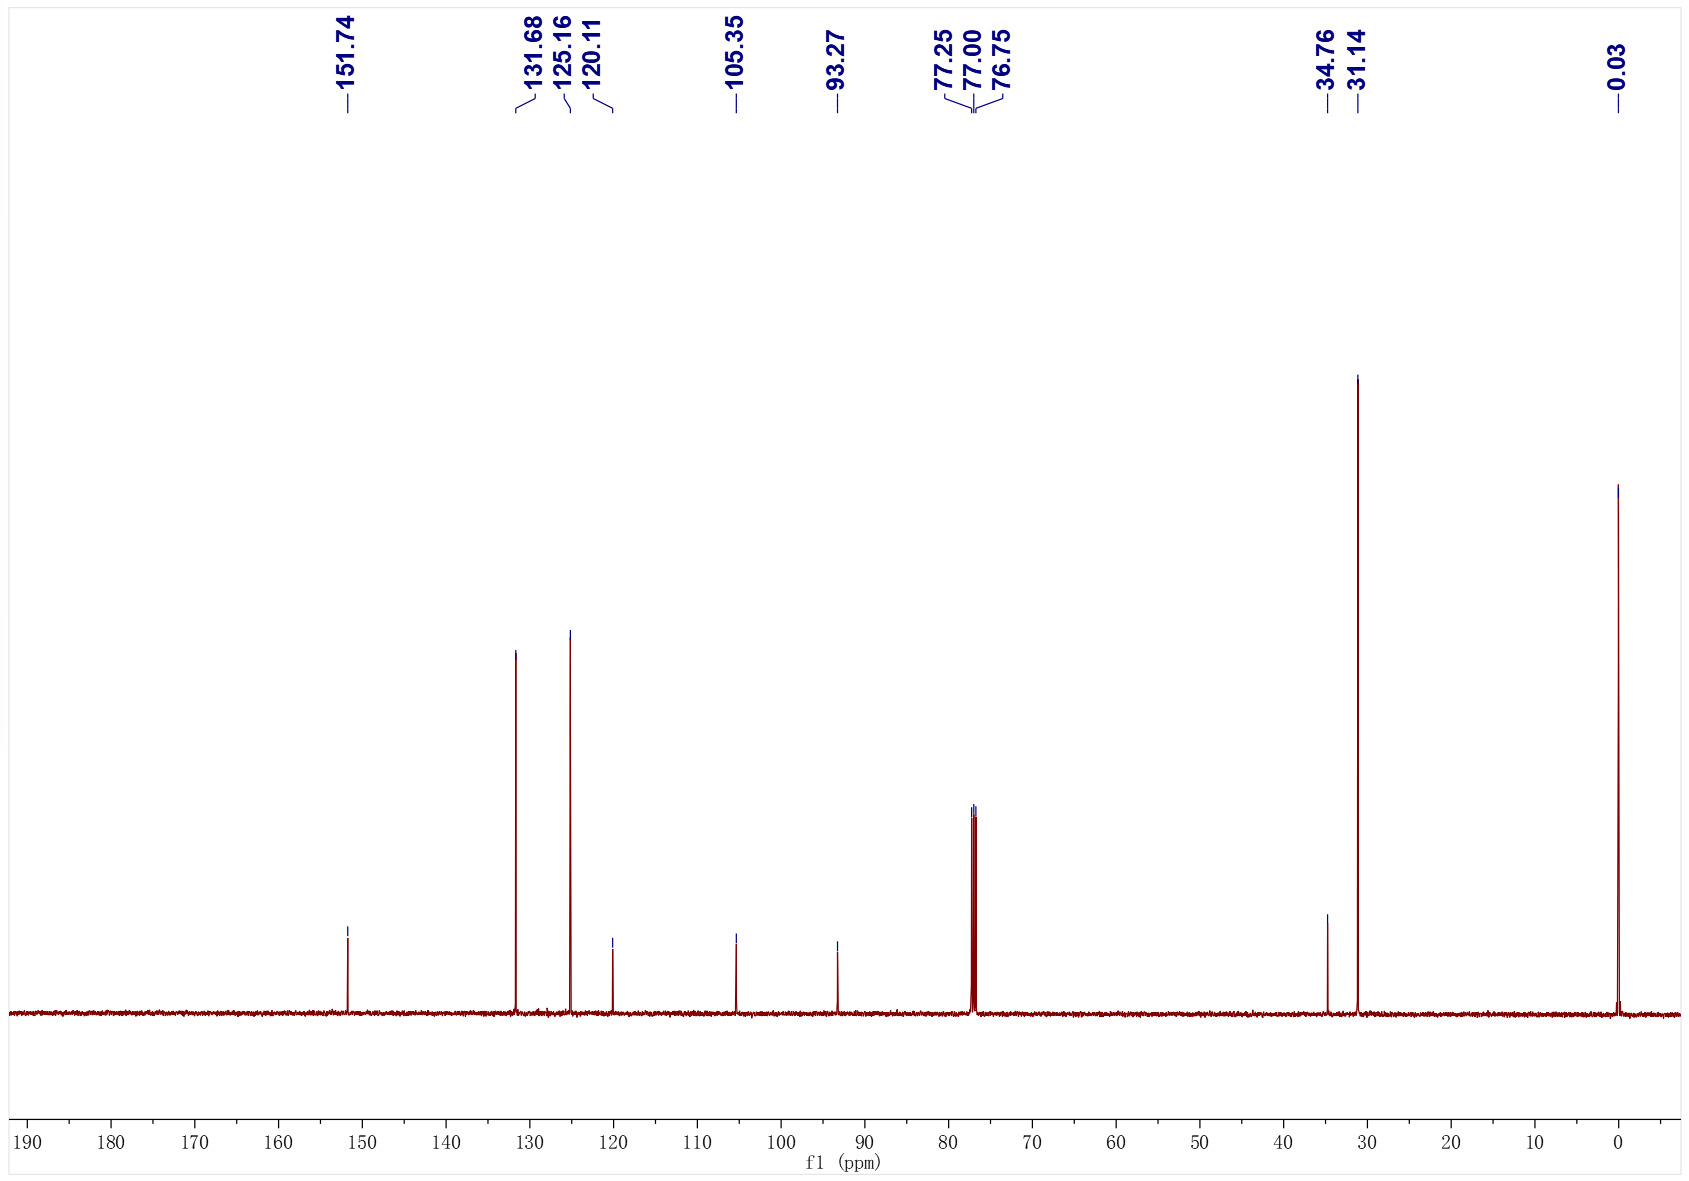


**3f; 1H NMR (500 MHz, CDCl3); 13C NMR (126 MHz, CDCl3)**


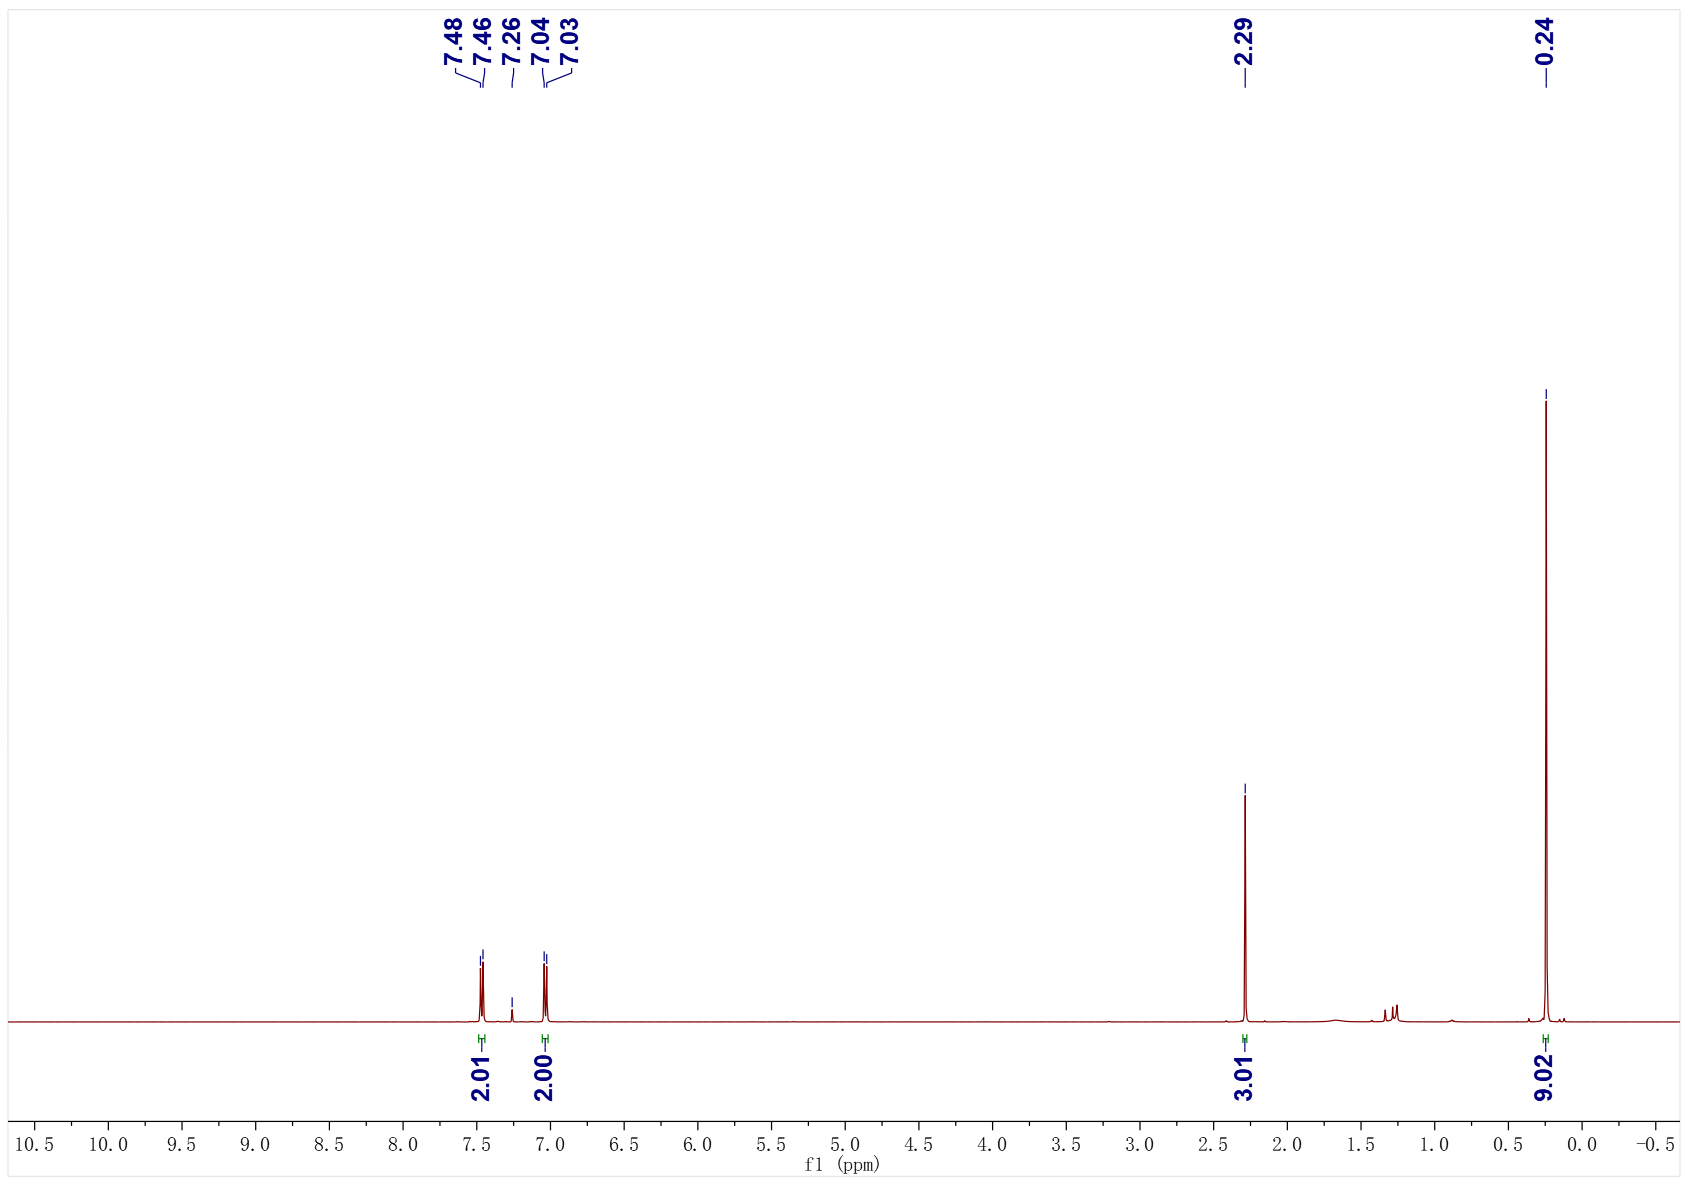

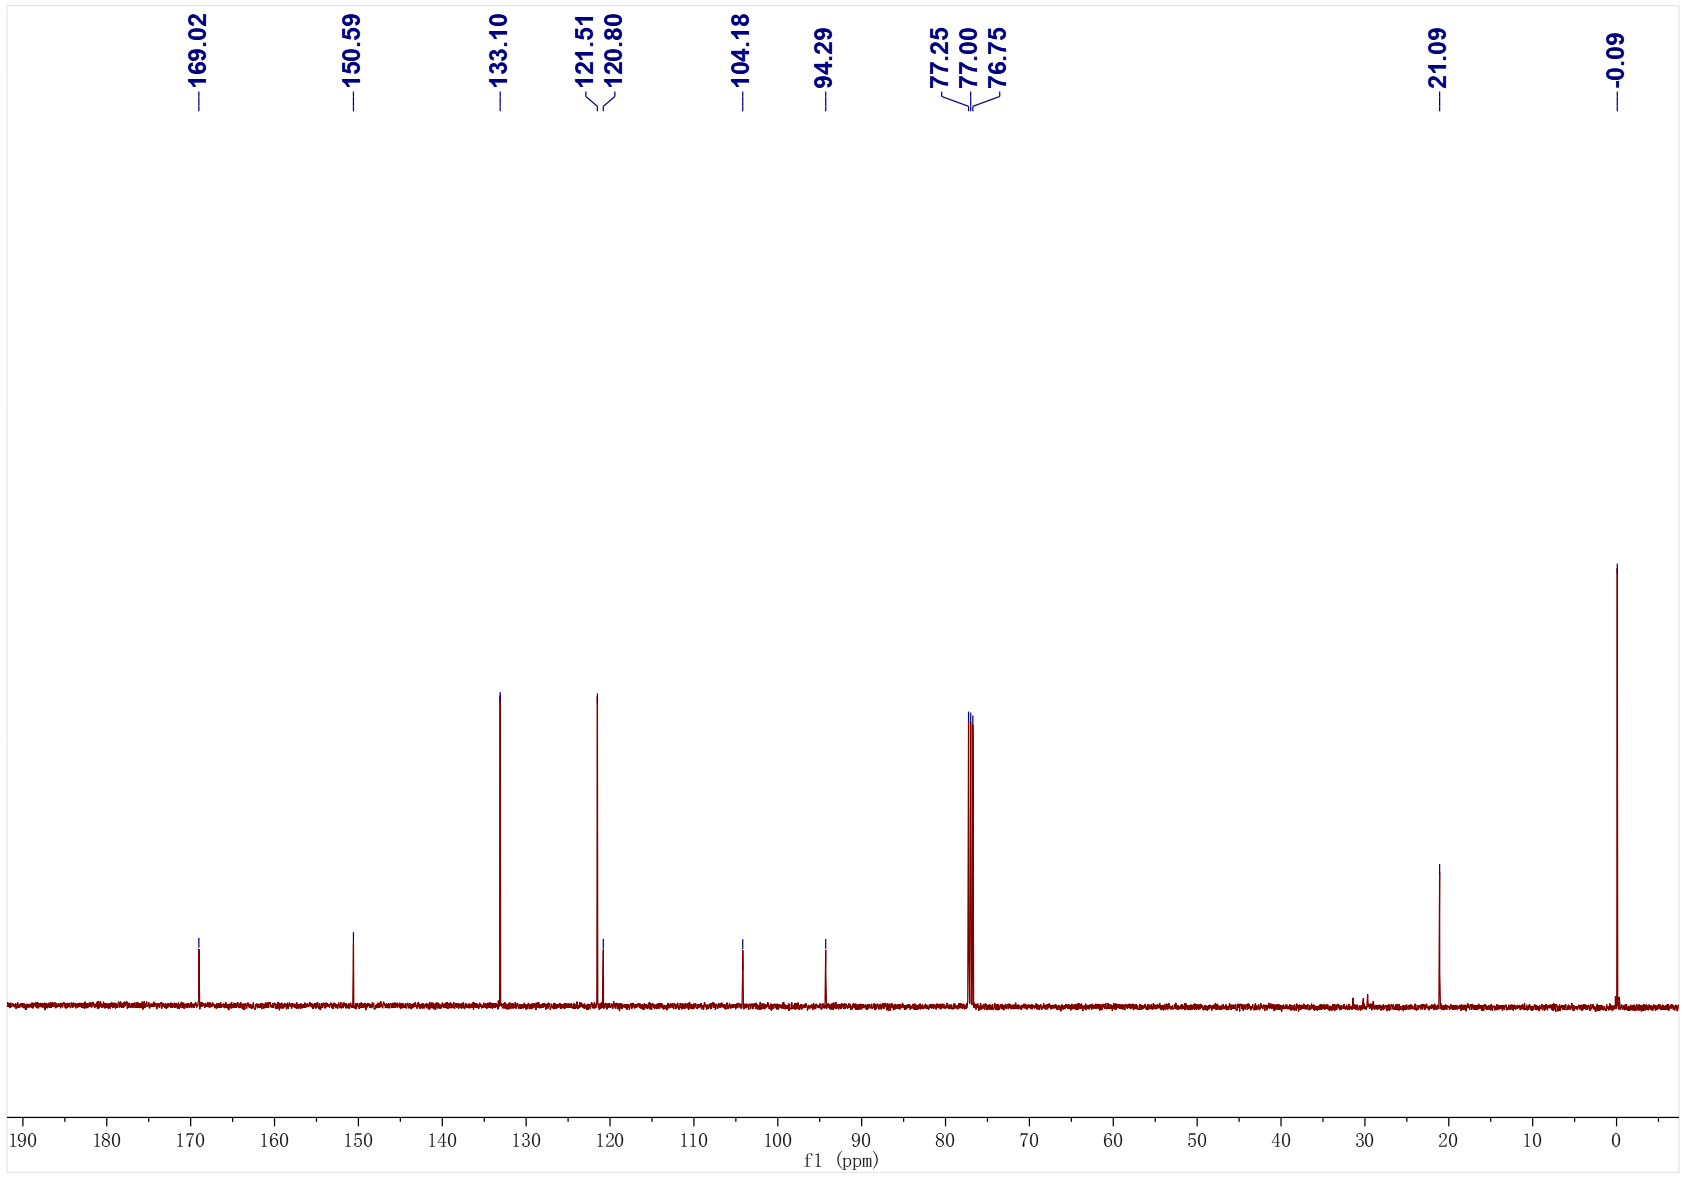


**3g; 1H NMR (500 MHz, CDCl3); 13C NMR (126 MHz, CDCl3)**


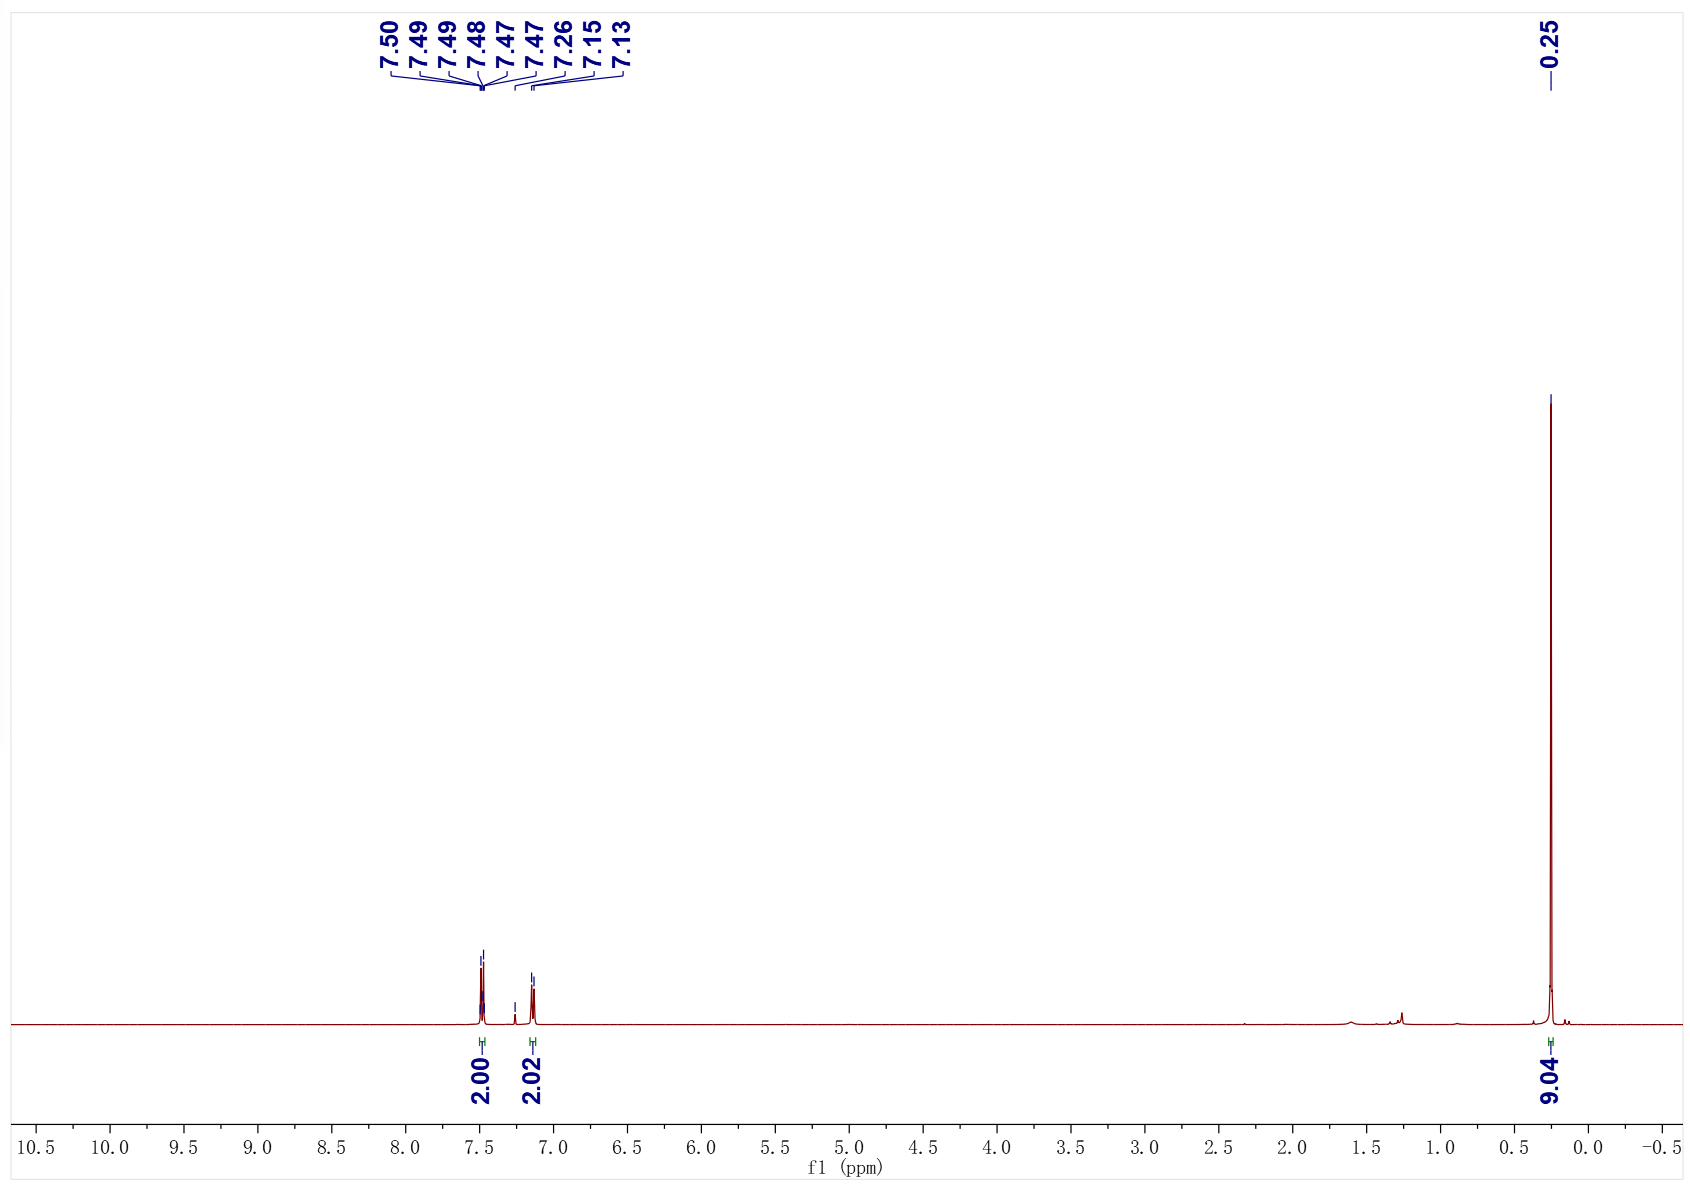

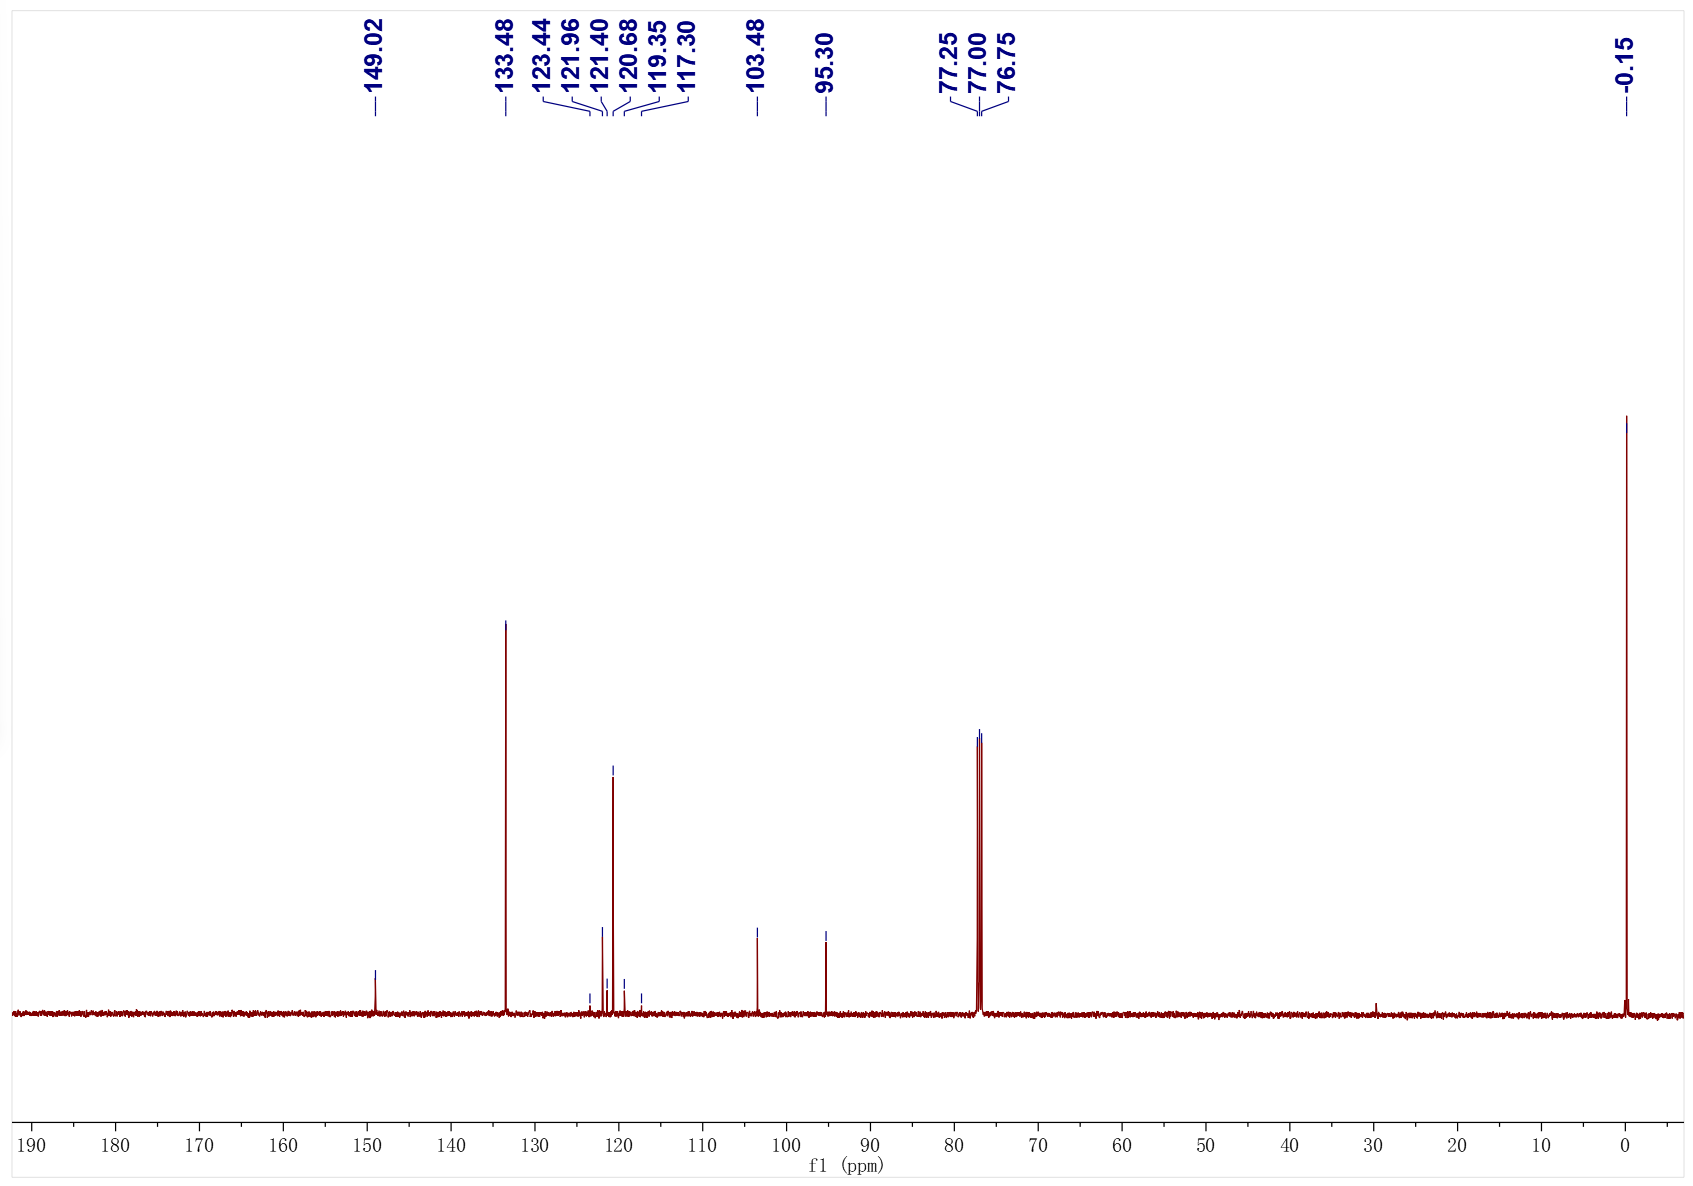


**3g; 19F NMR (471 MHz, CDCl3)**
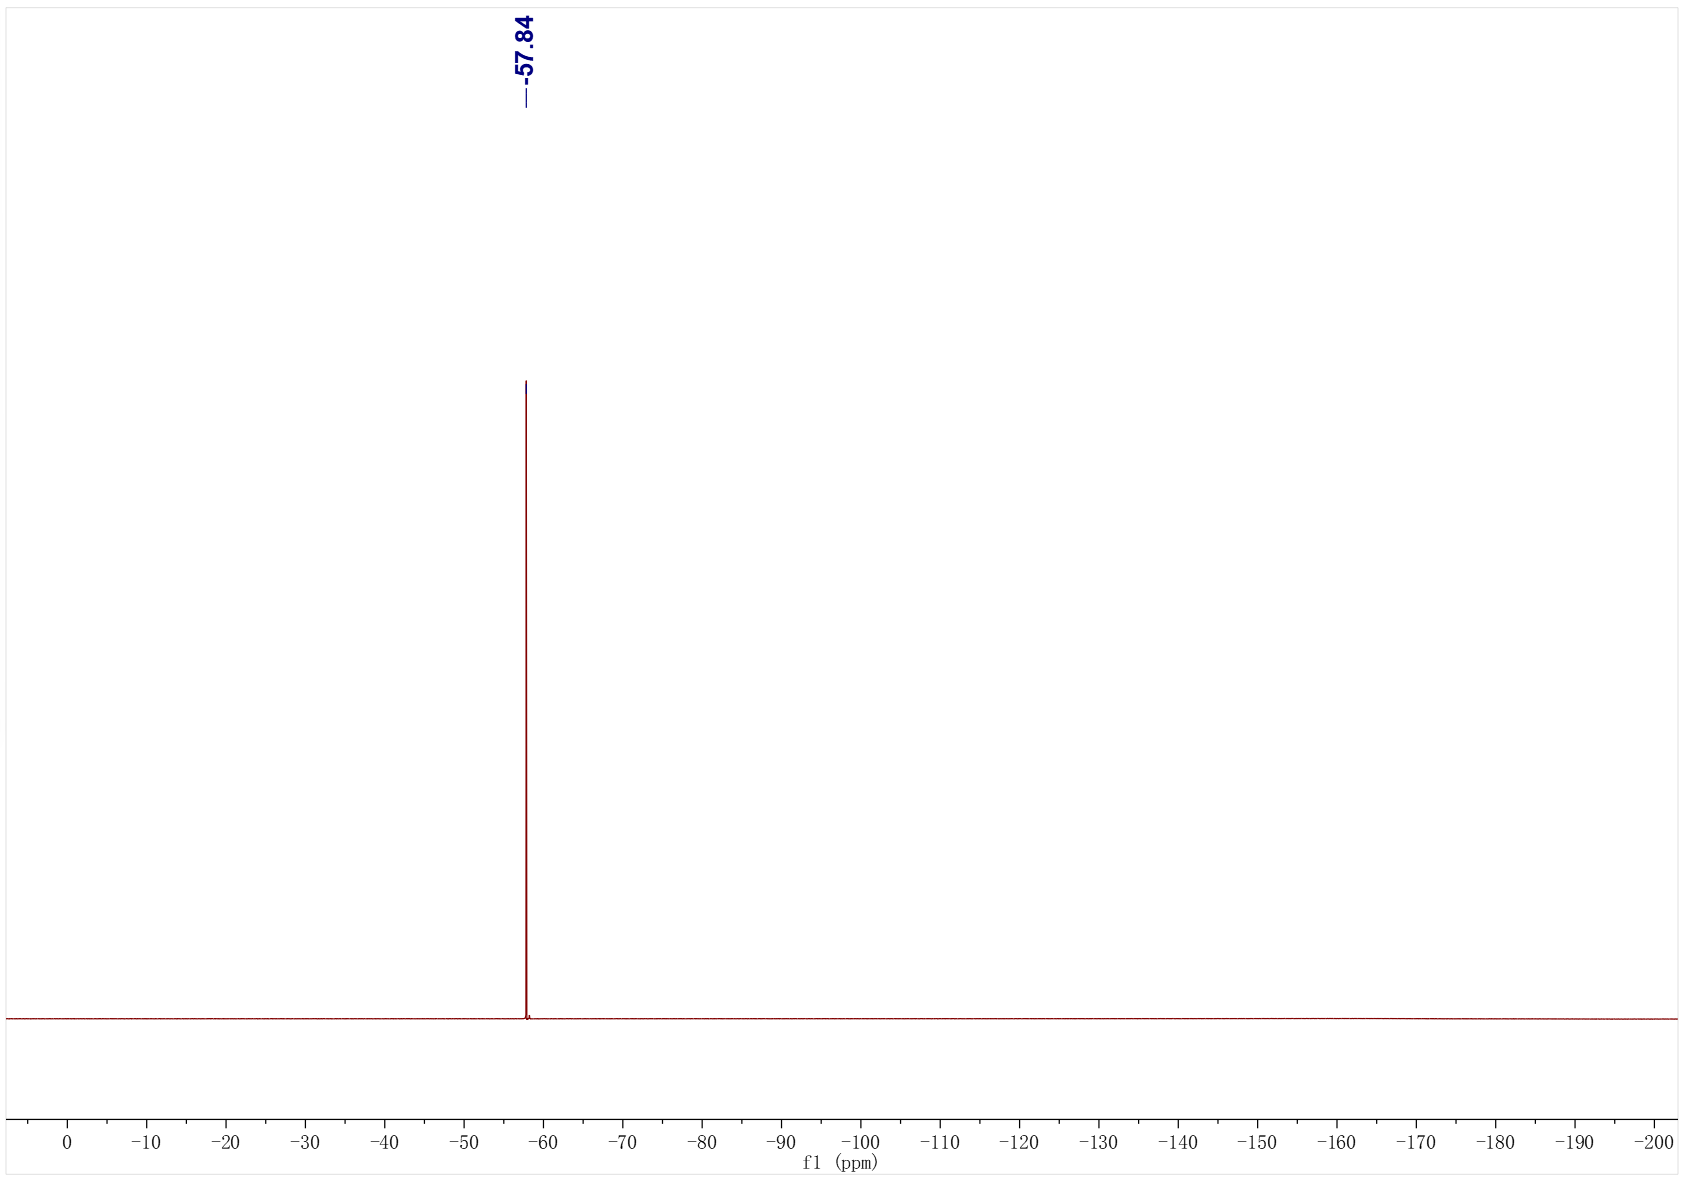


**3h; 1H NMR (500 MHz, CDCl3); 13C NMR (126 MHz, CDCl3)**


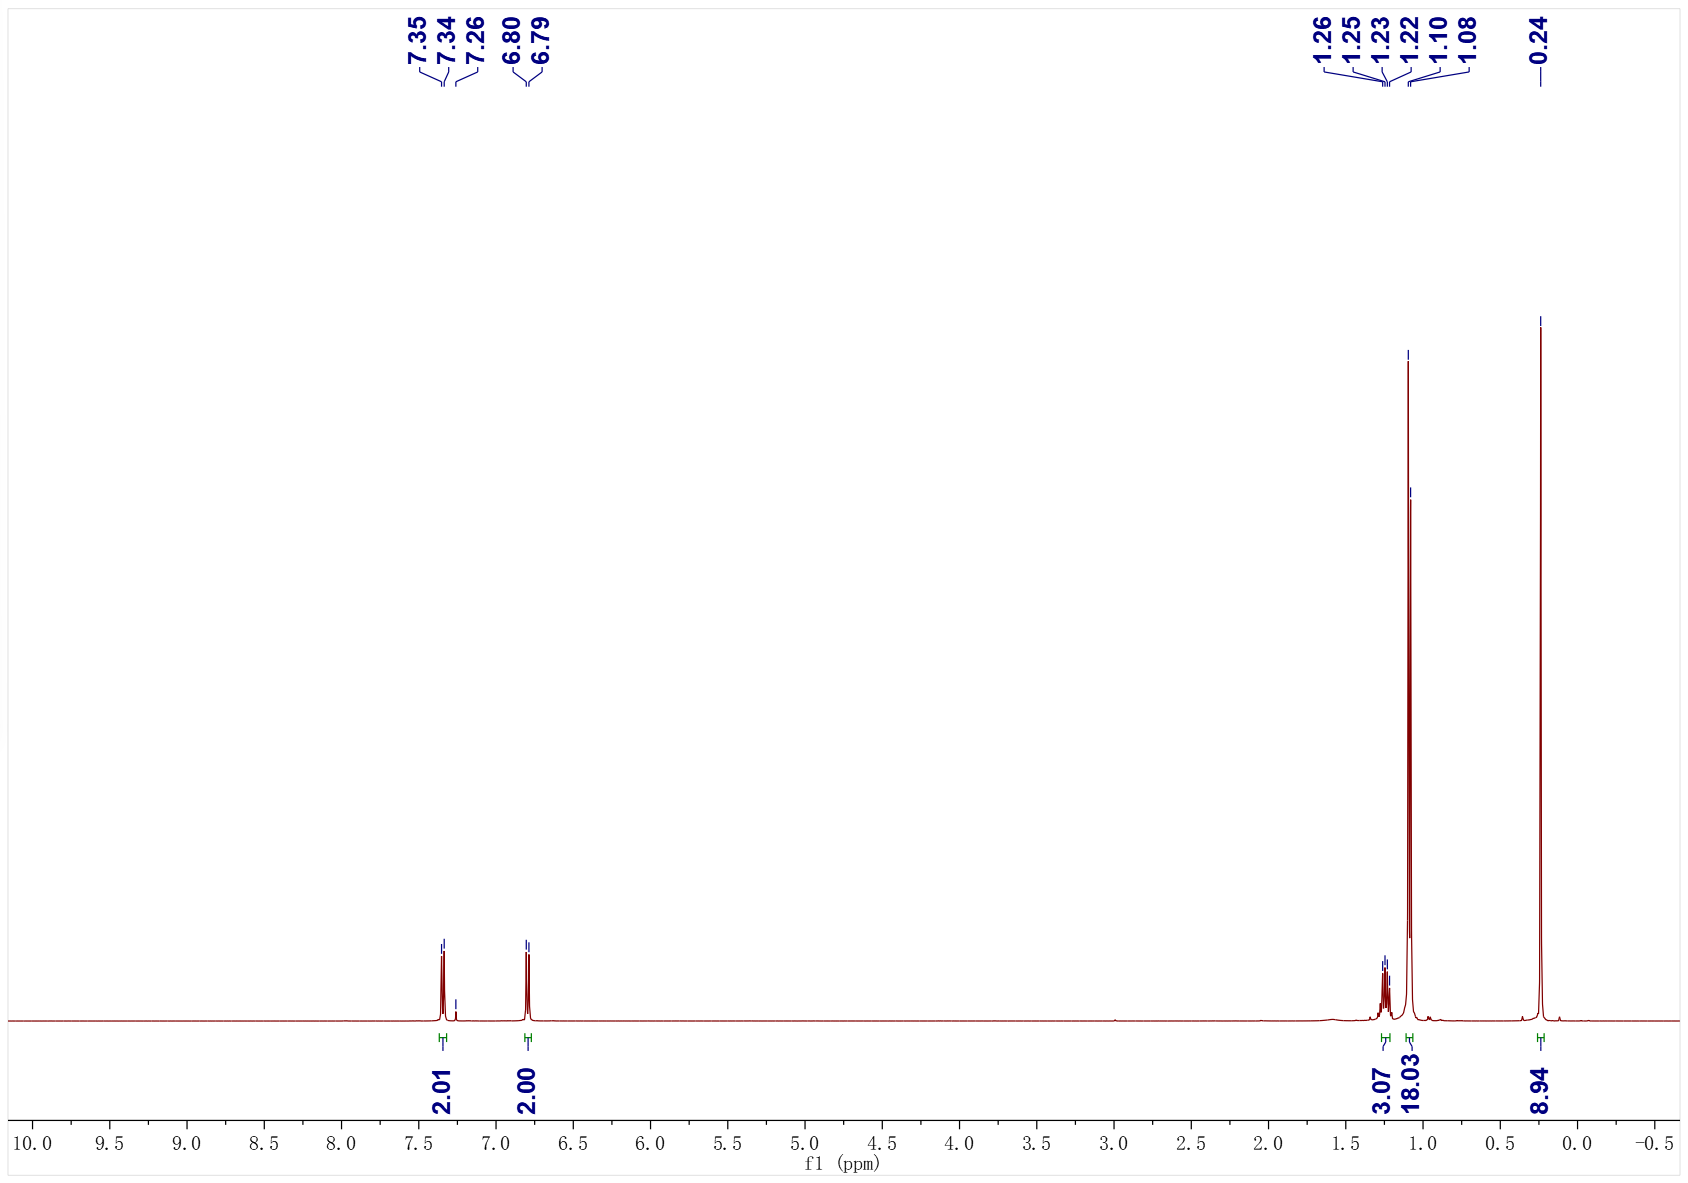

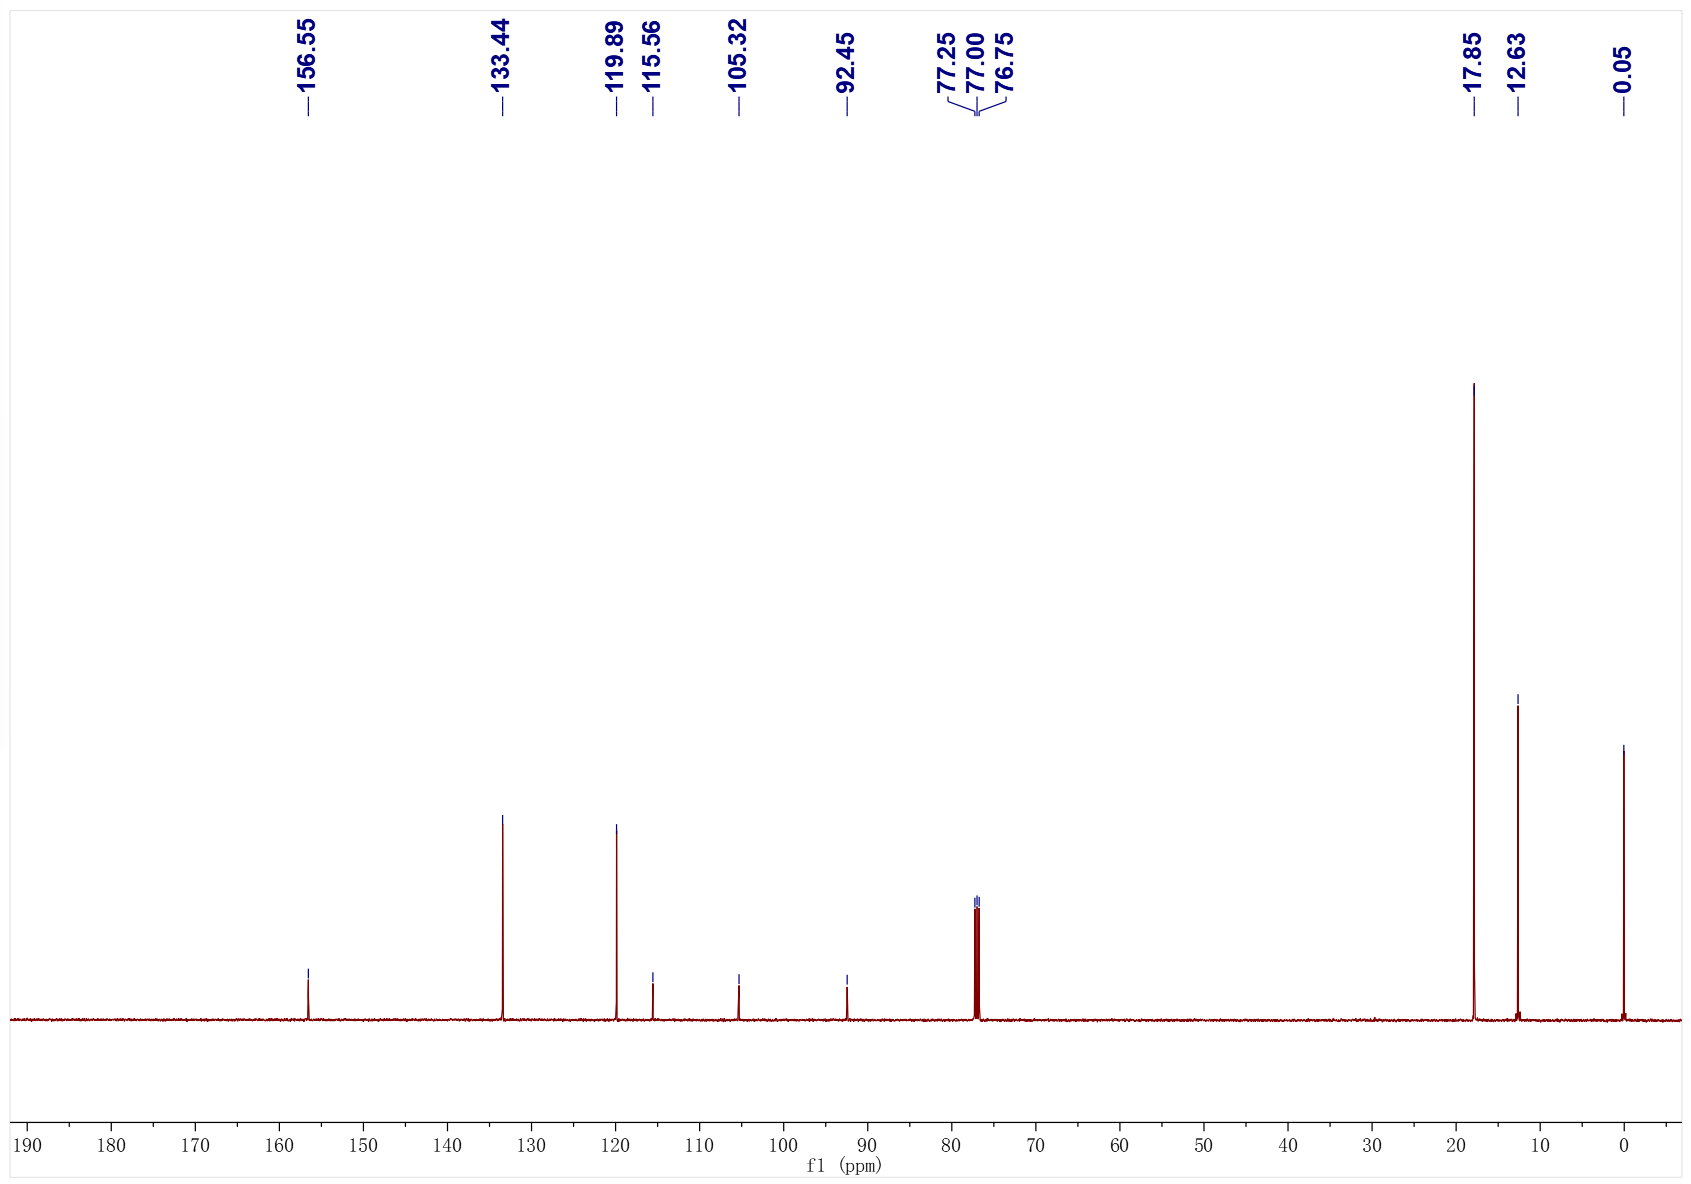


**3i; 1H NMR (500 MHz, CDCl3); 13C NMR (126 MHz, CDCl3)**


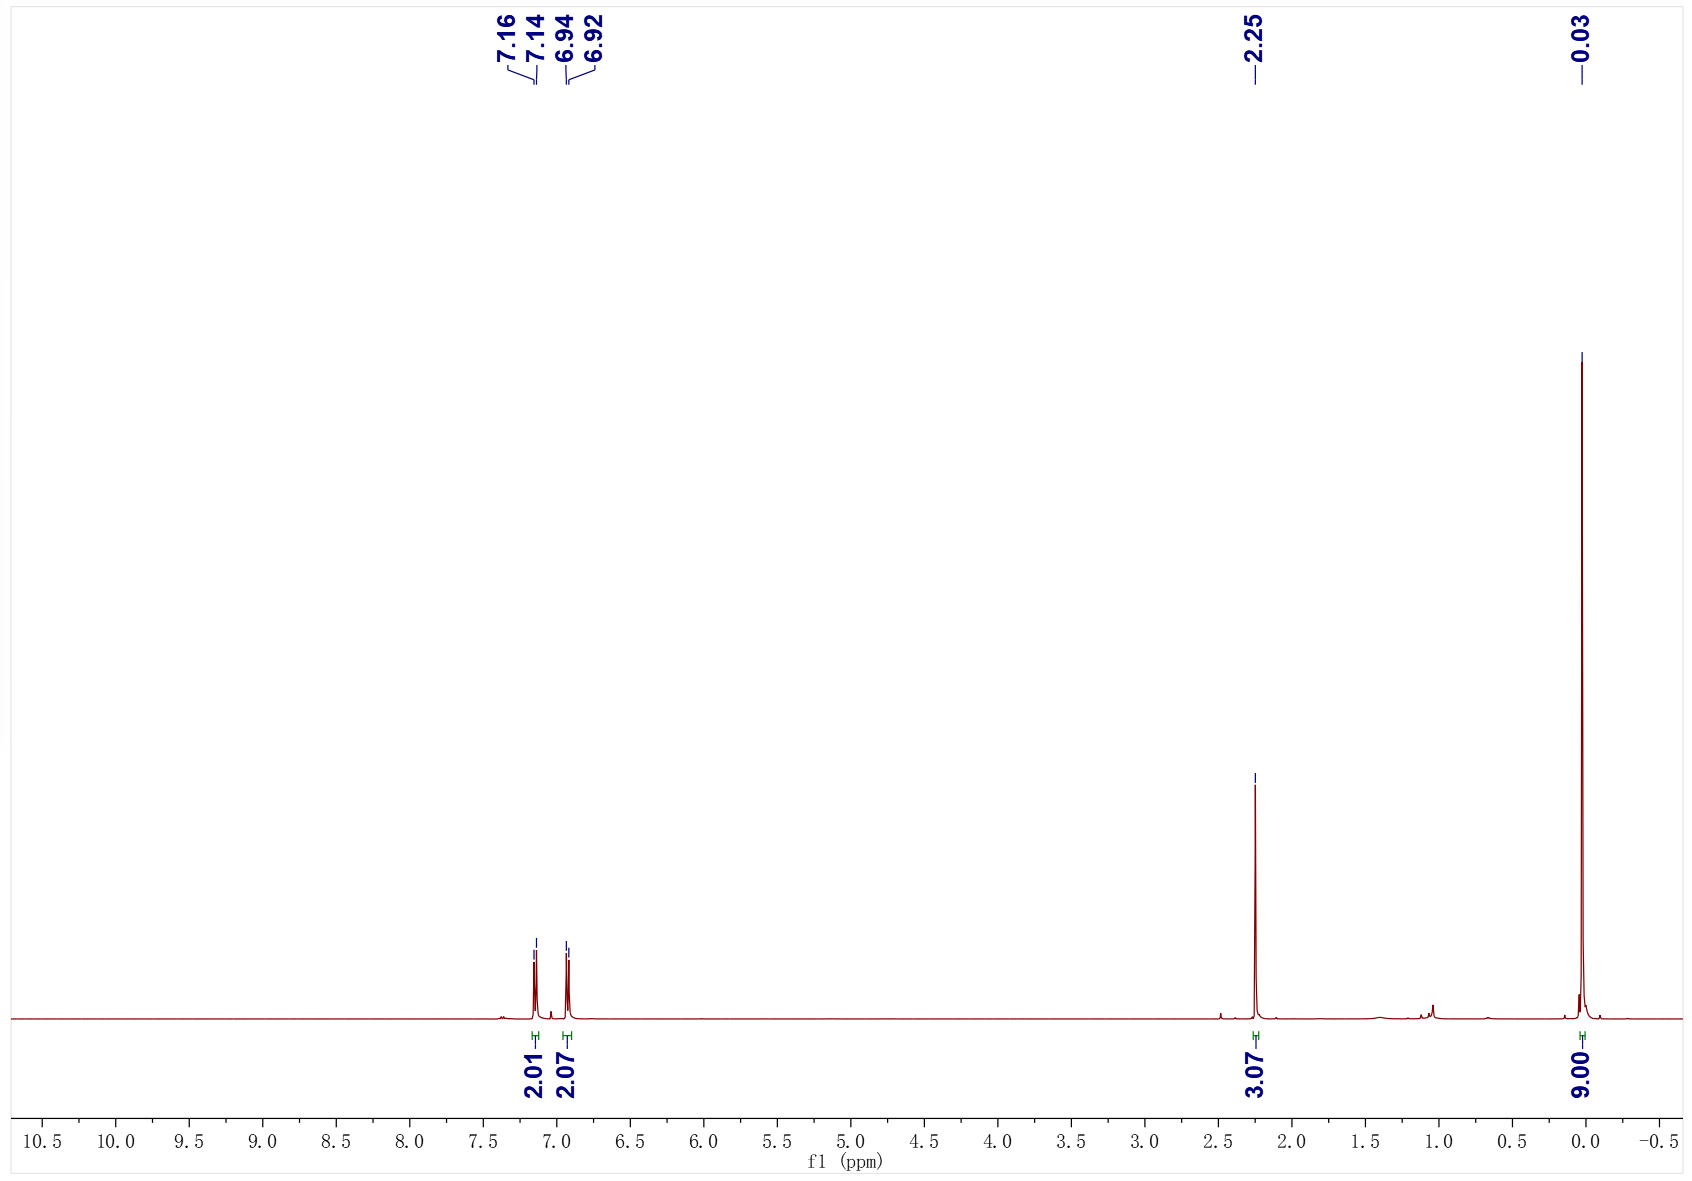

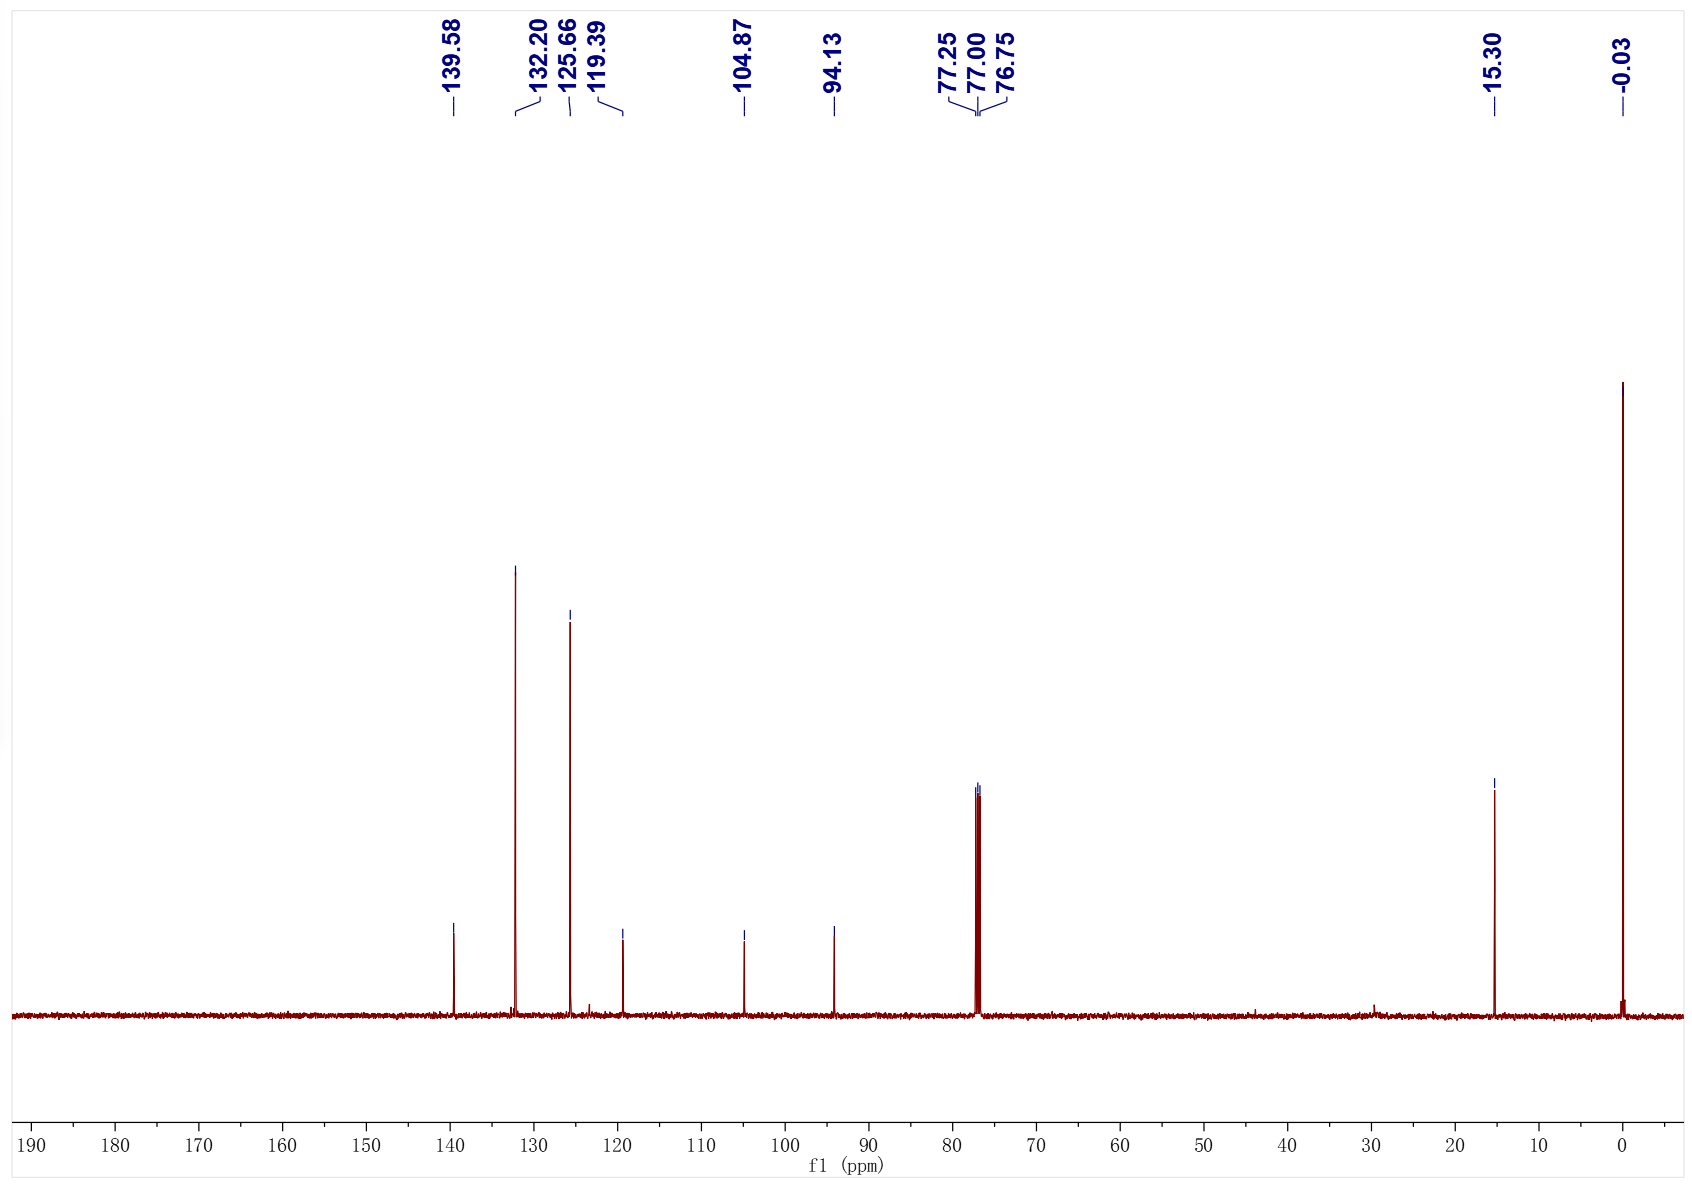


**3j; 1H NMR (500 MHz, CDCl3); 13C NMR (126 MHz, CDCl3)**


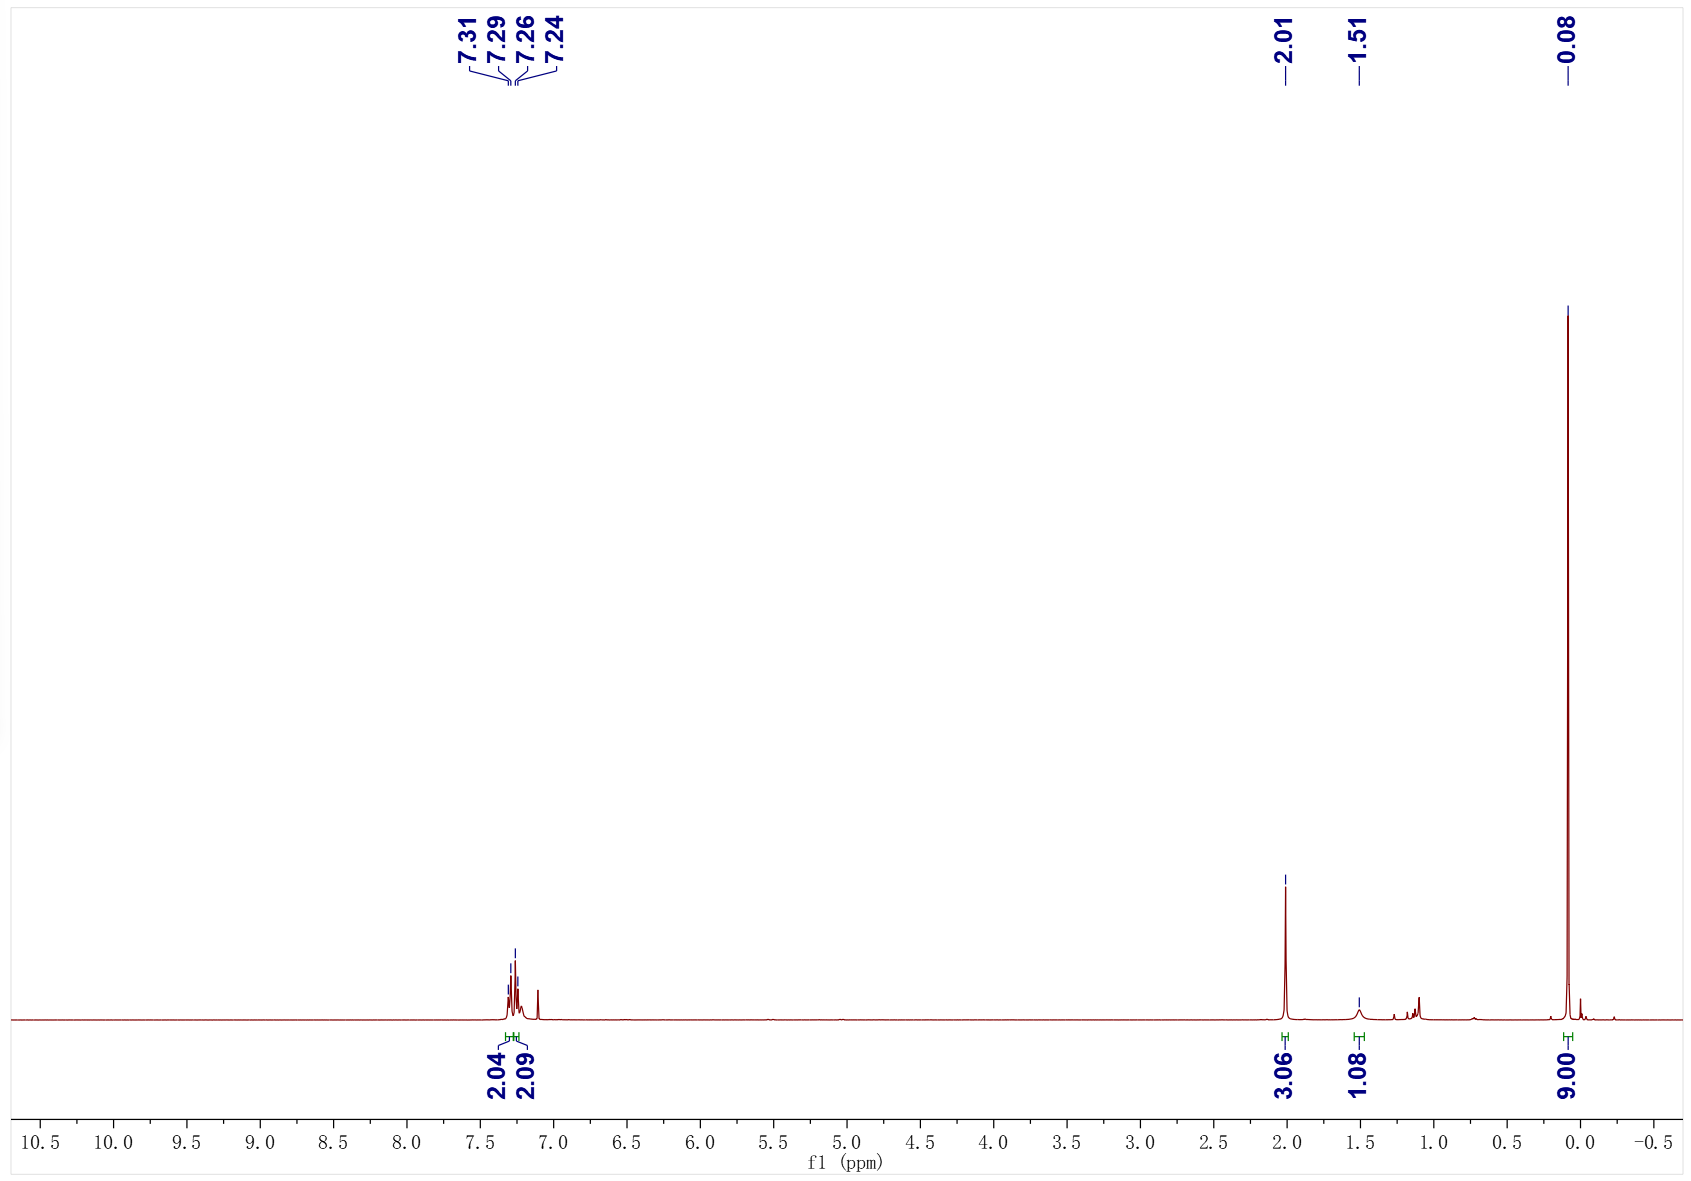

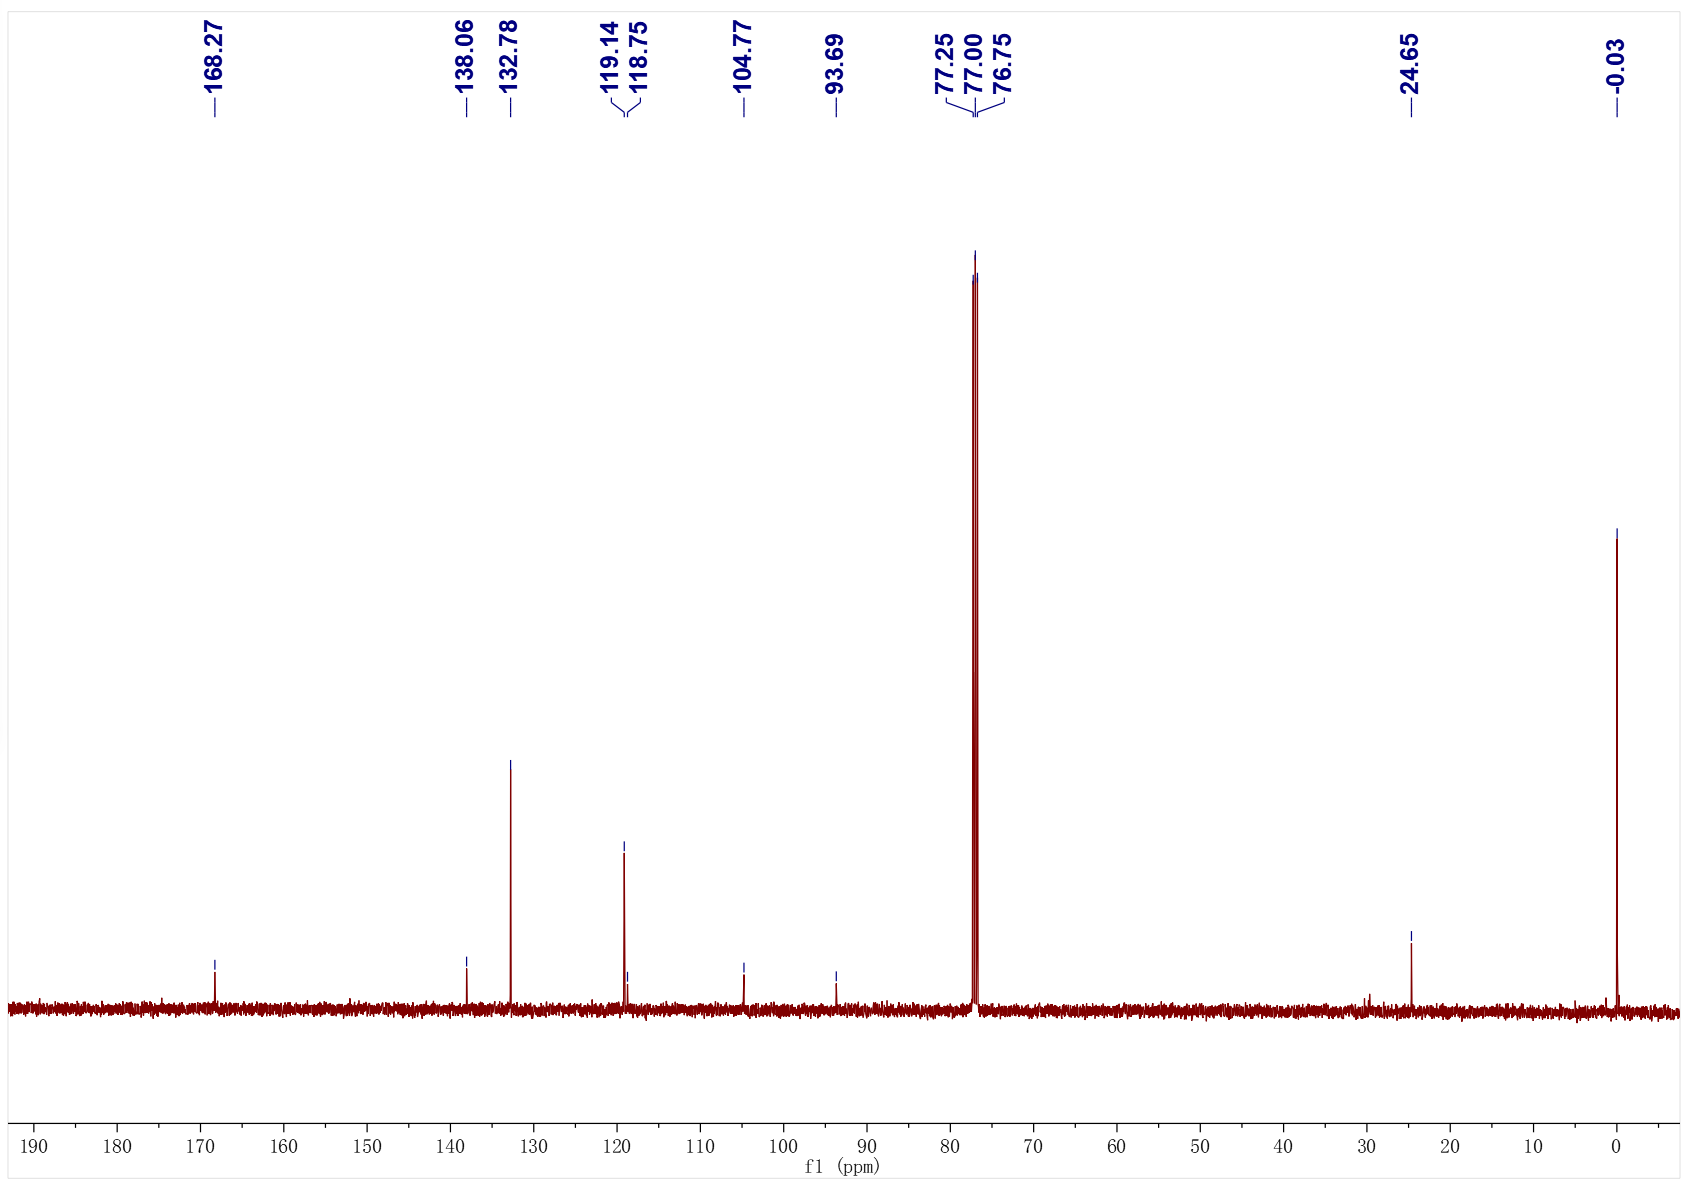


**3k; 1H NMR (400 MHz, CDCl3); 13C NMR (126 MHz, CDCl3)**


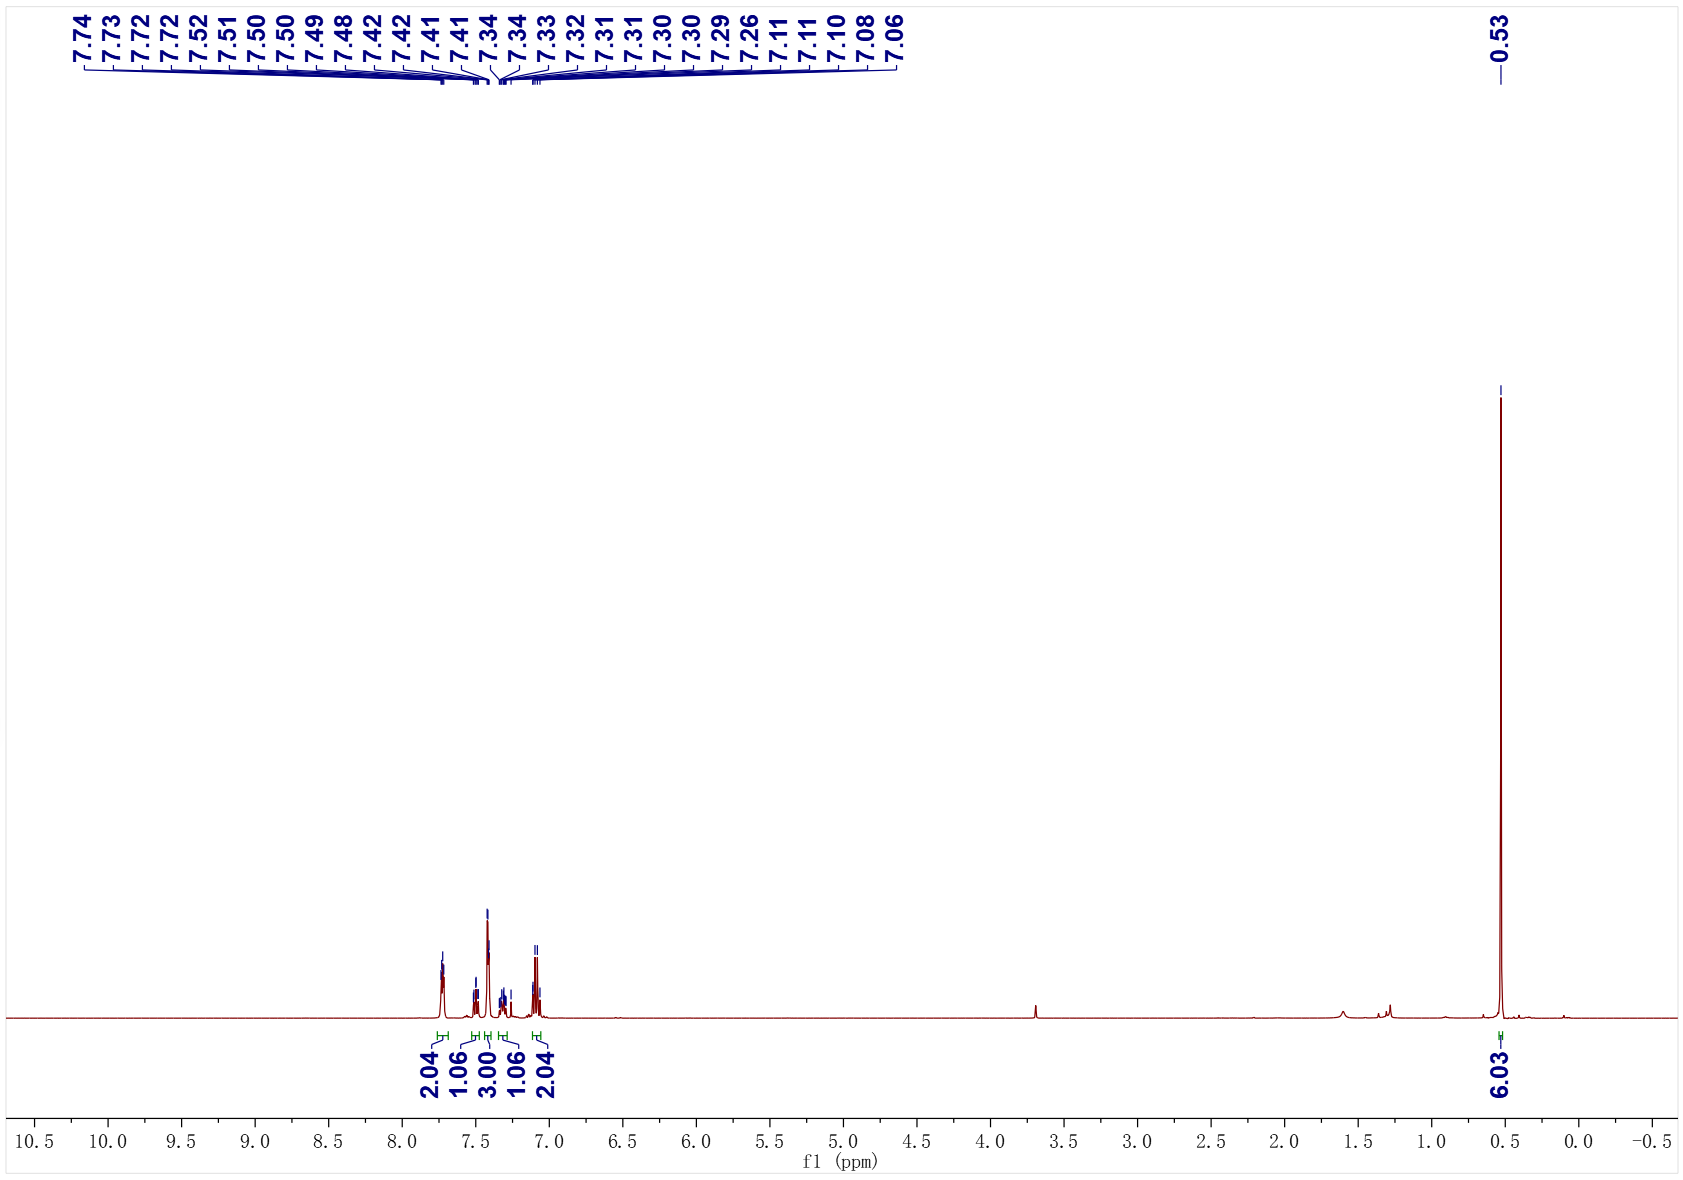

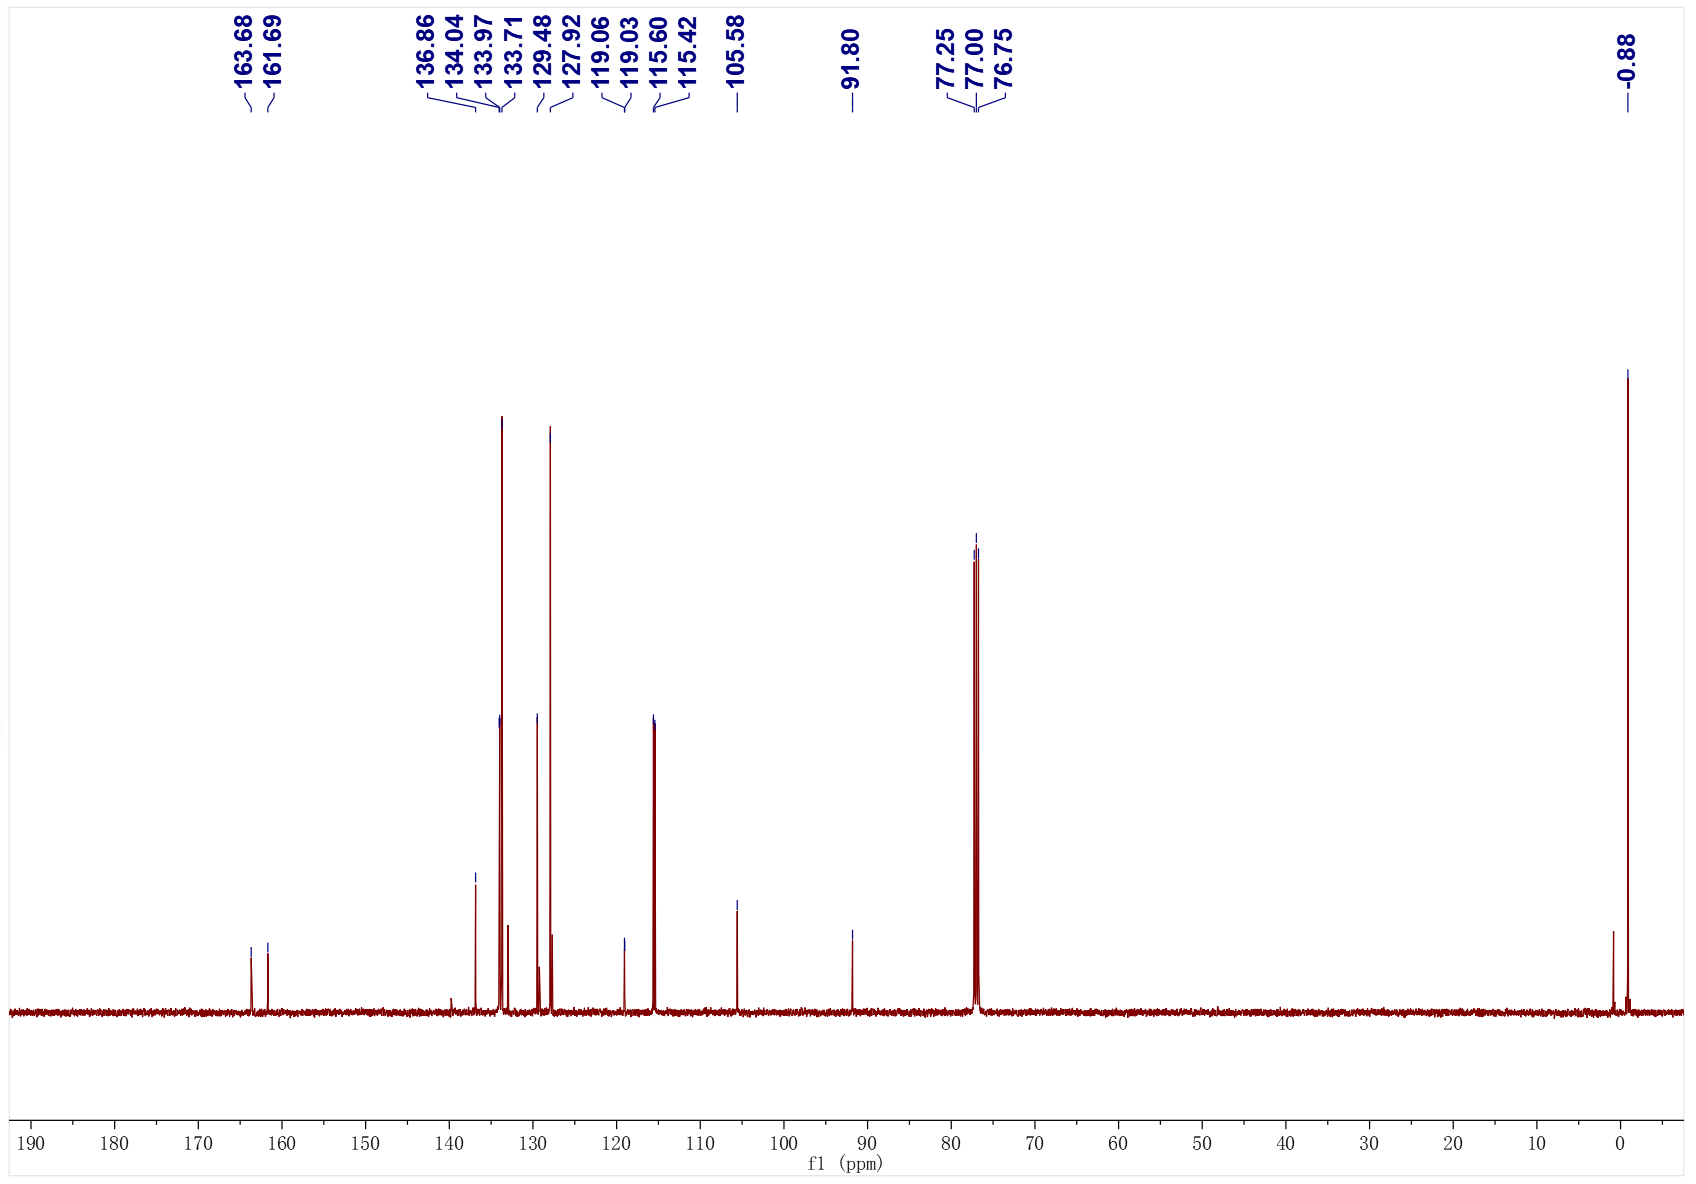


**3k; 19F NMR (471 MHz, CDCl3)**
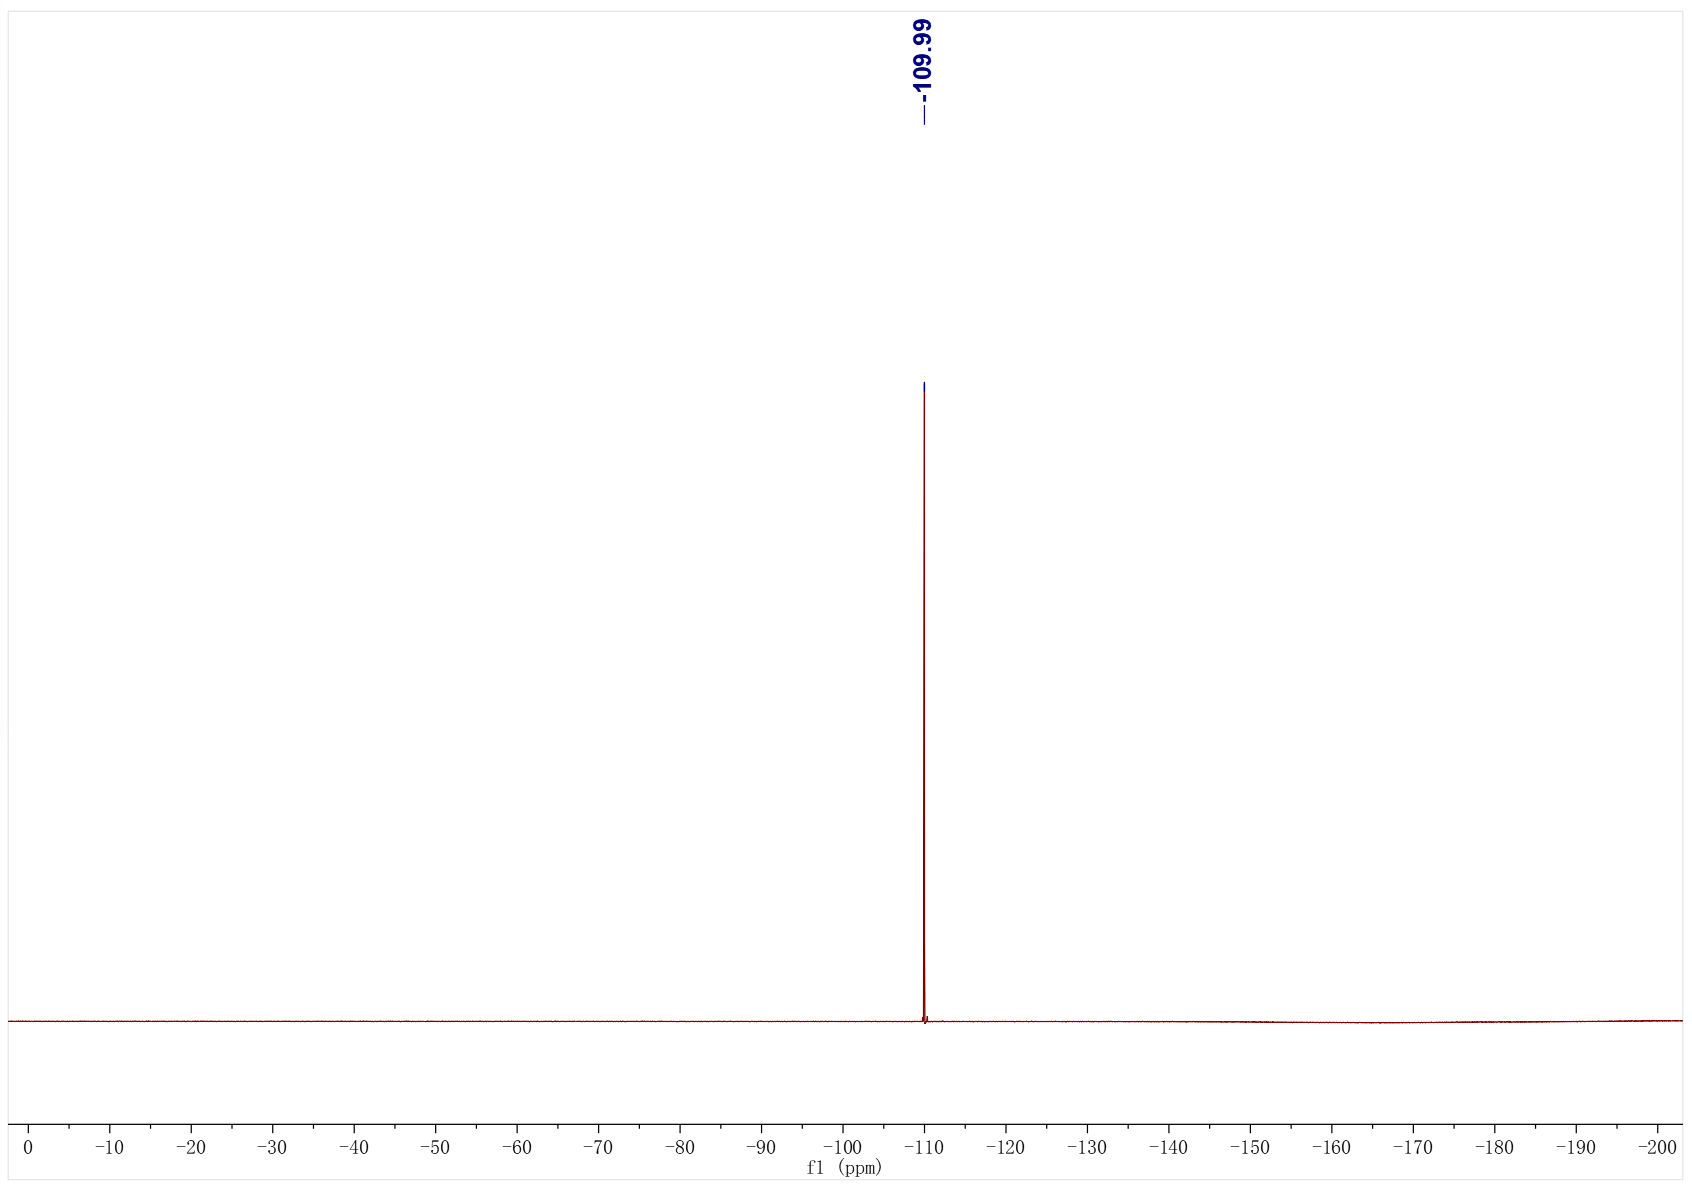


**3l; 1H NMR (500 MHz, CDCl3); 13C NMR (126 MHz, CDCl3)**
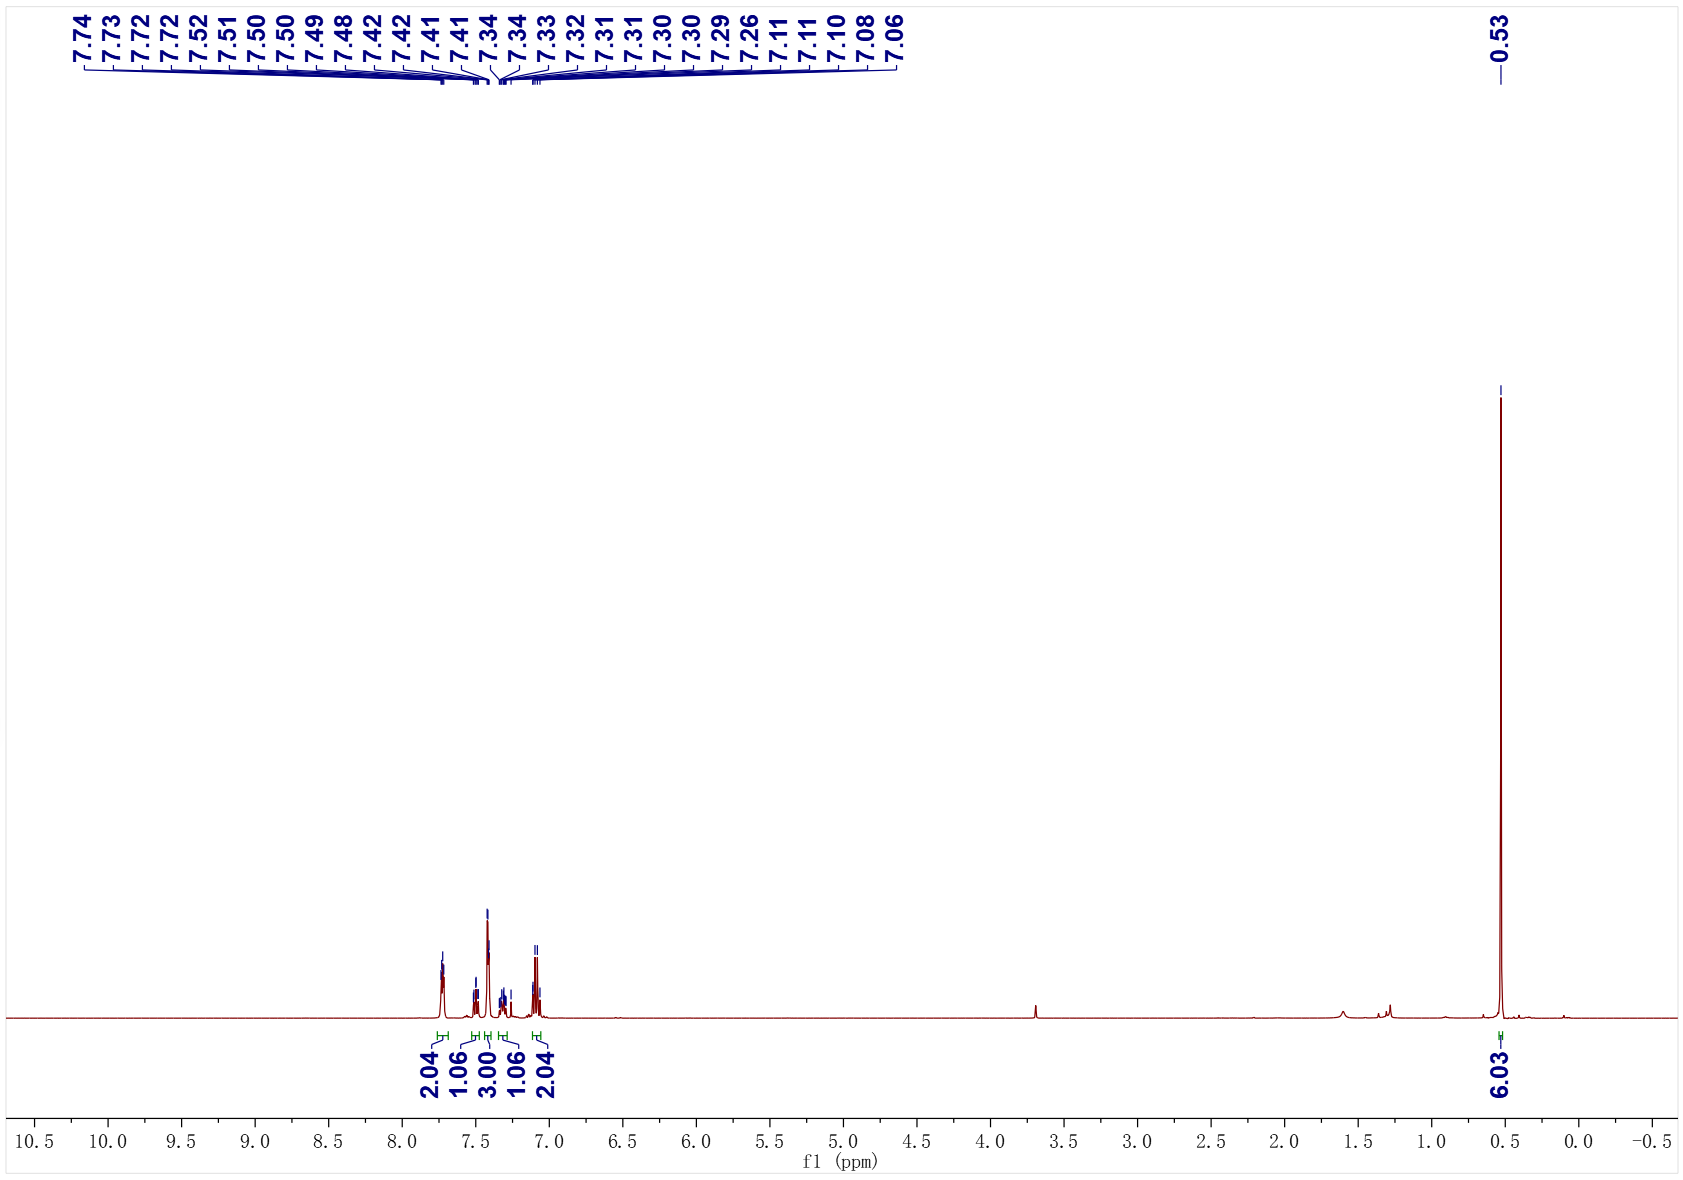

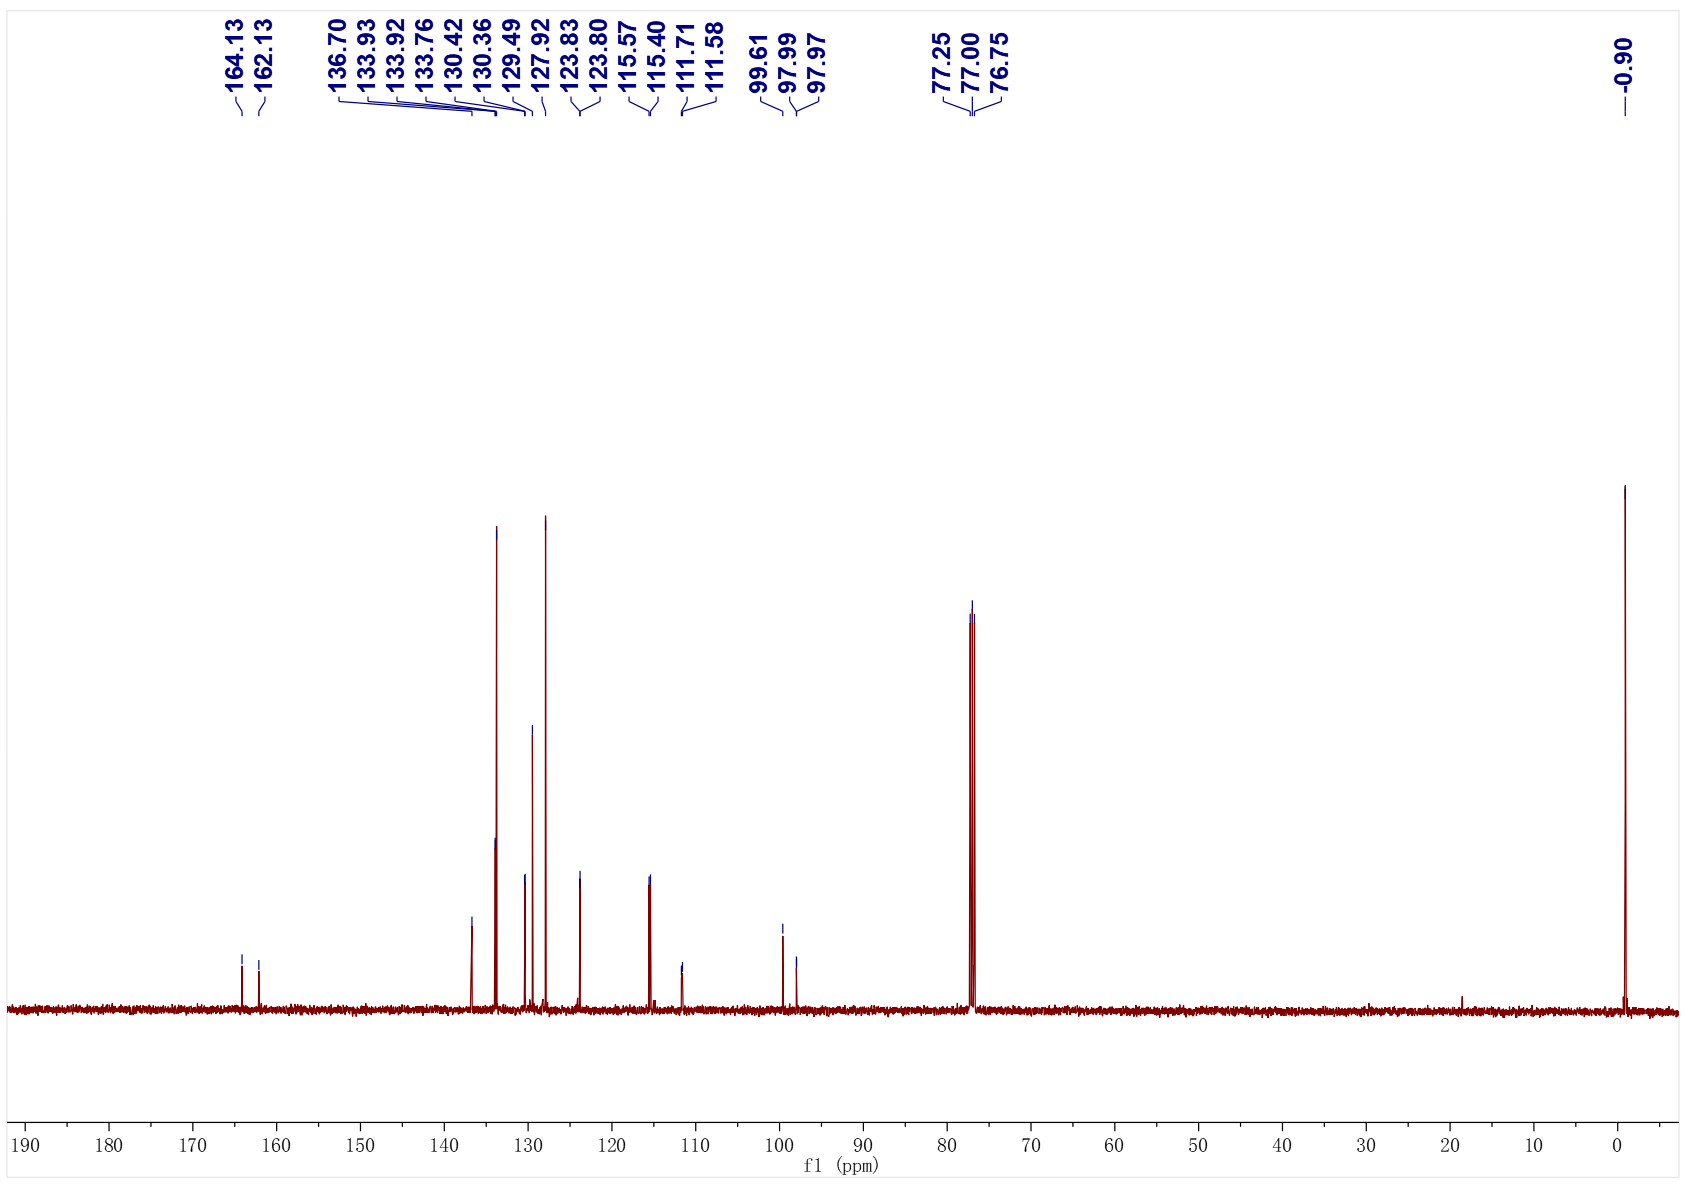


**3l; 19F NMR (471 MHz, CDCl3)**


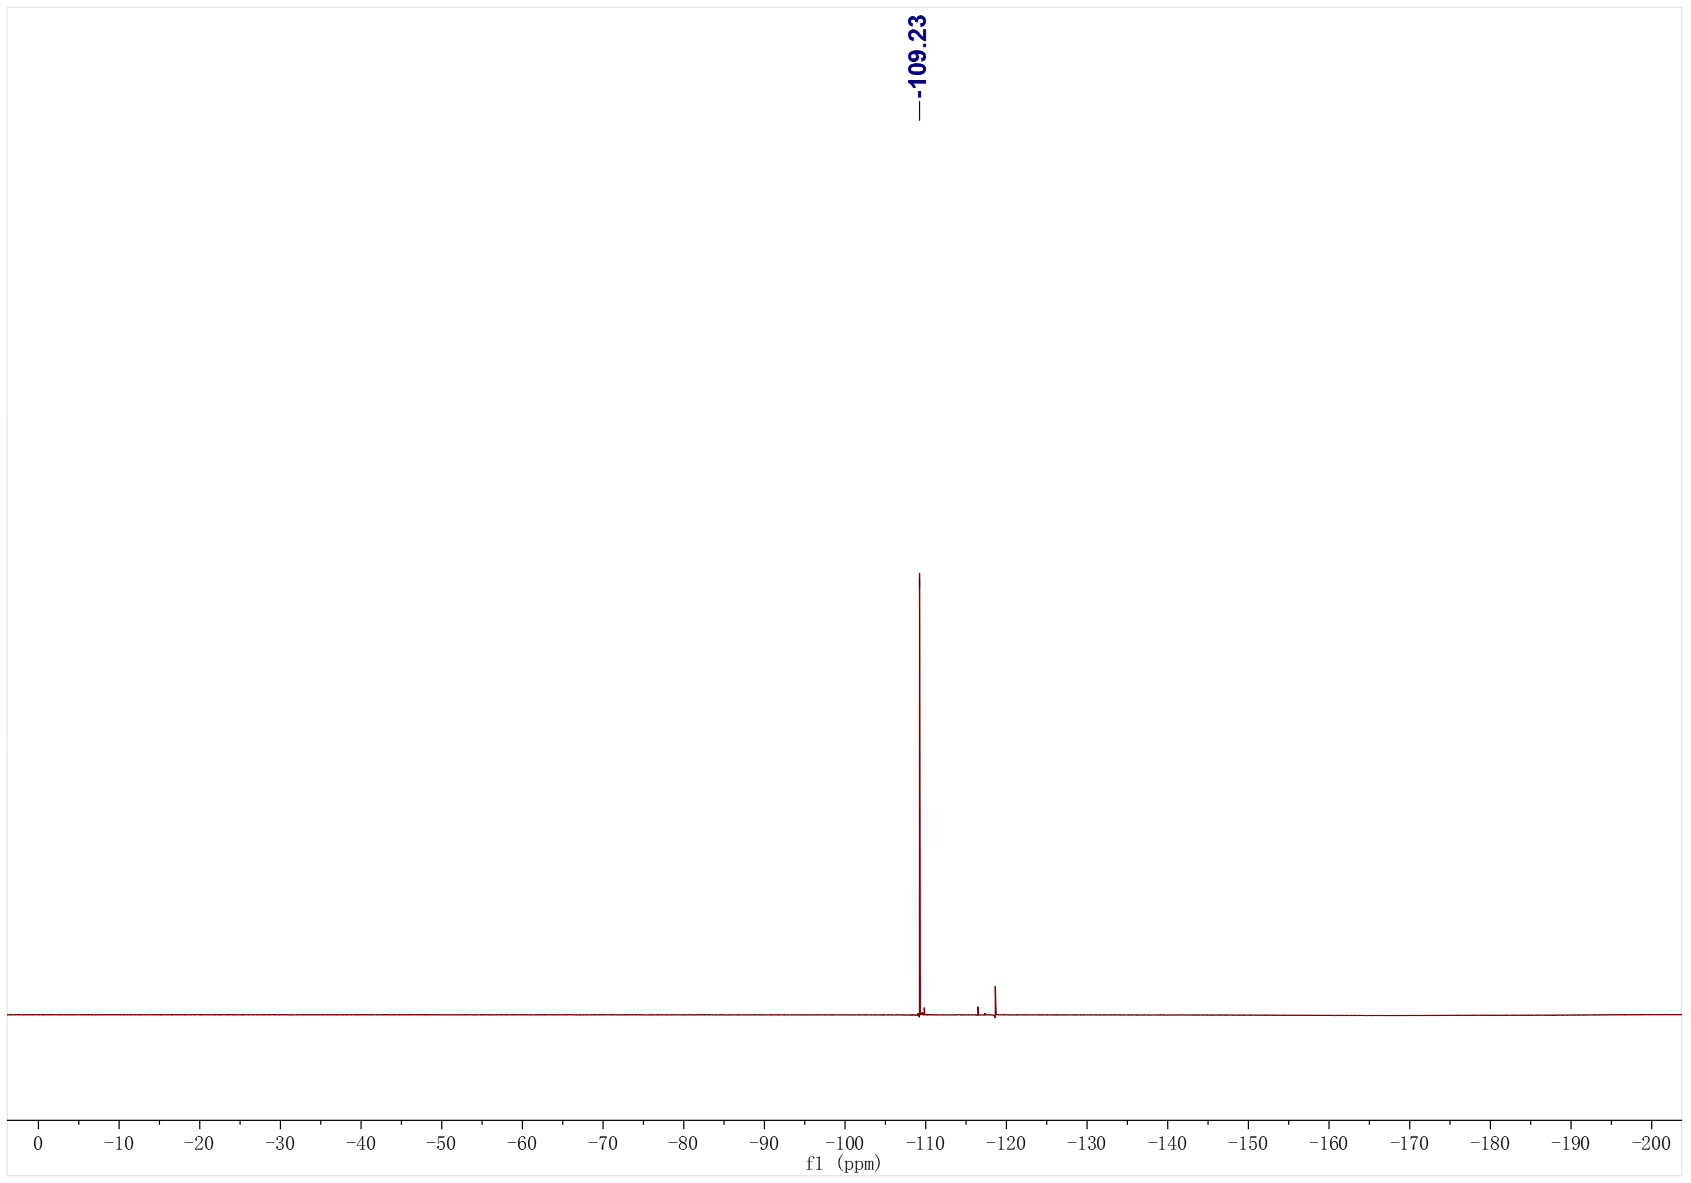


**3m; 1H NMR (500 MHz, CDCl3); 13C NMR (126 MHz, CDCl3)**
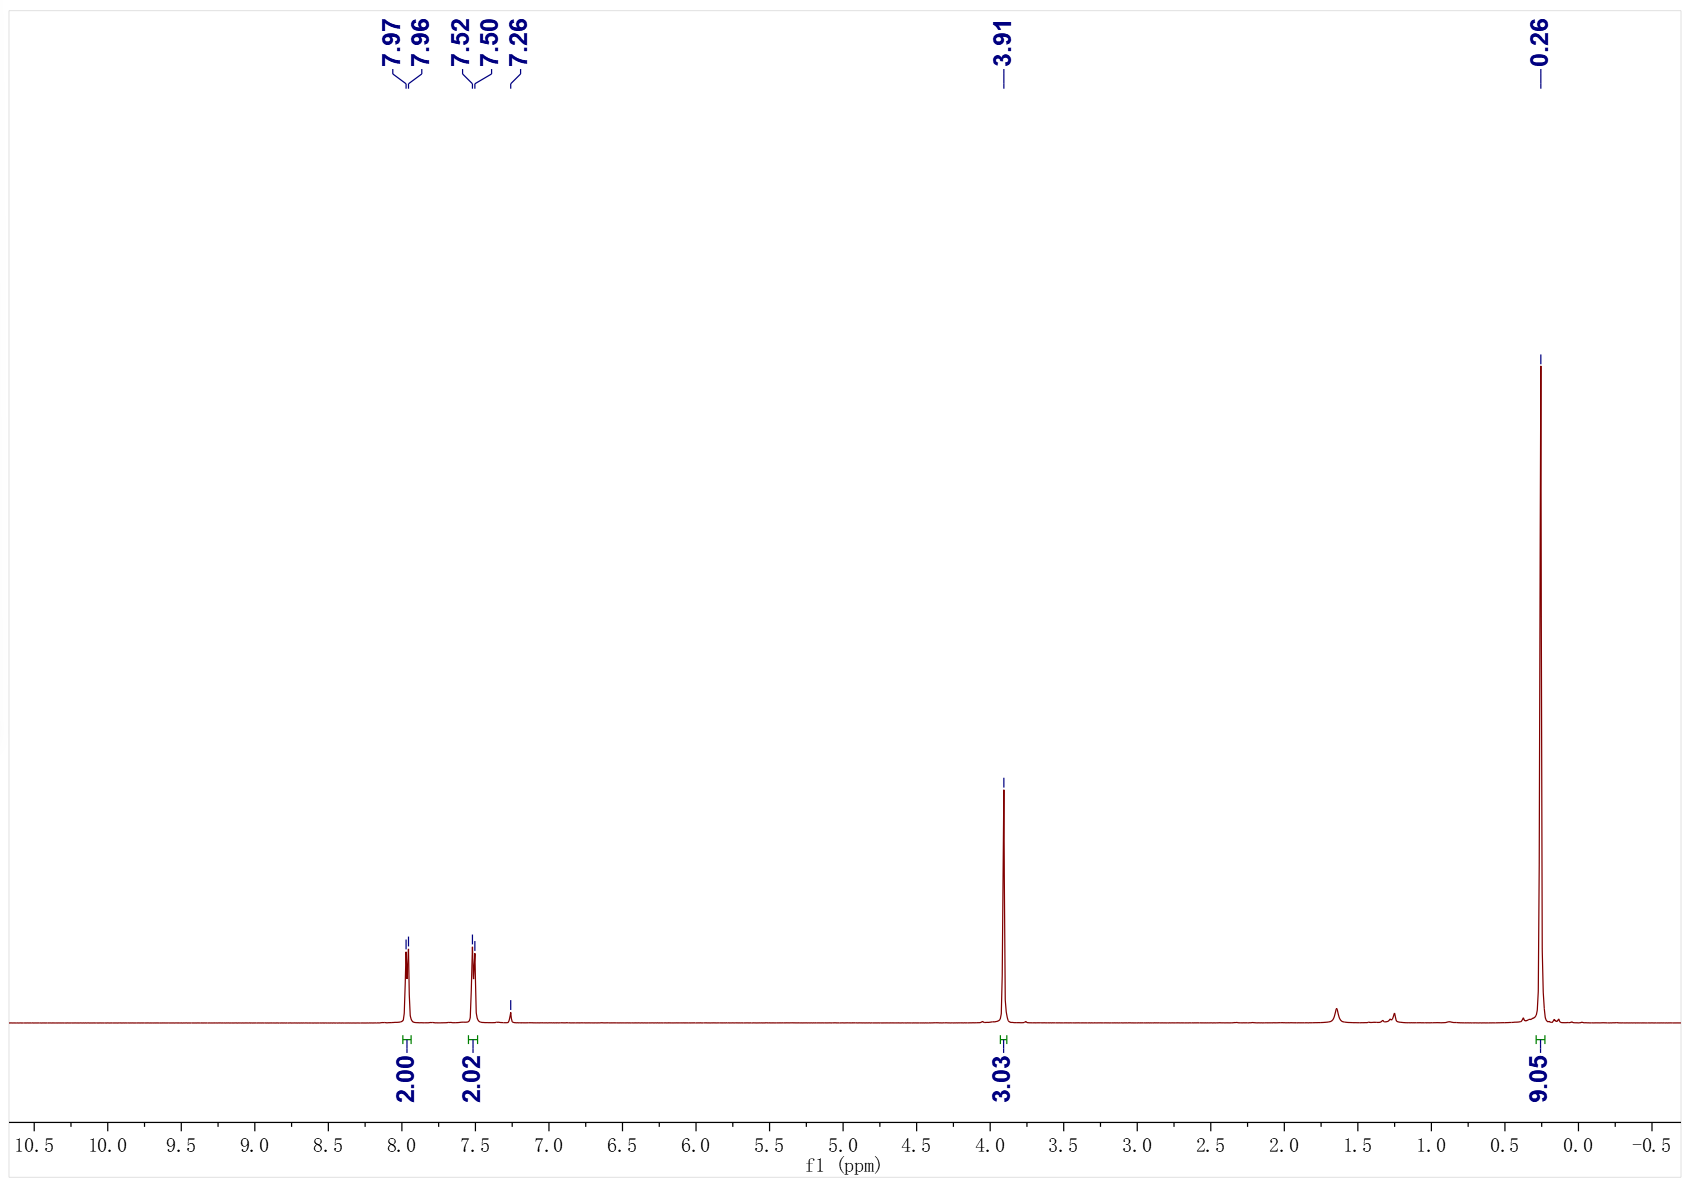

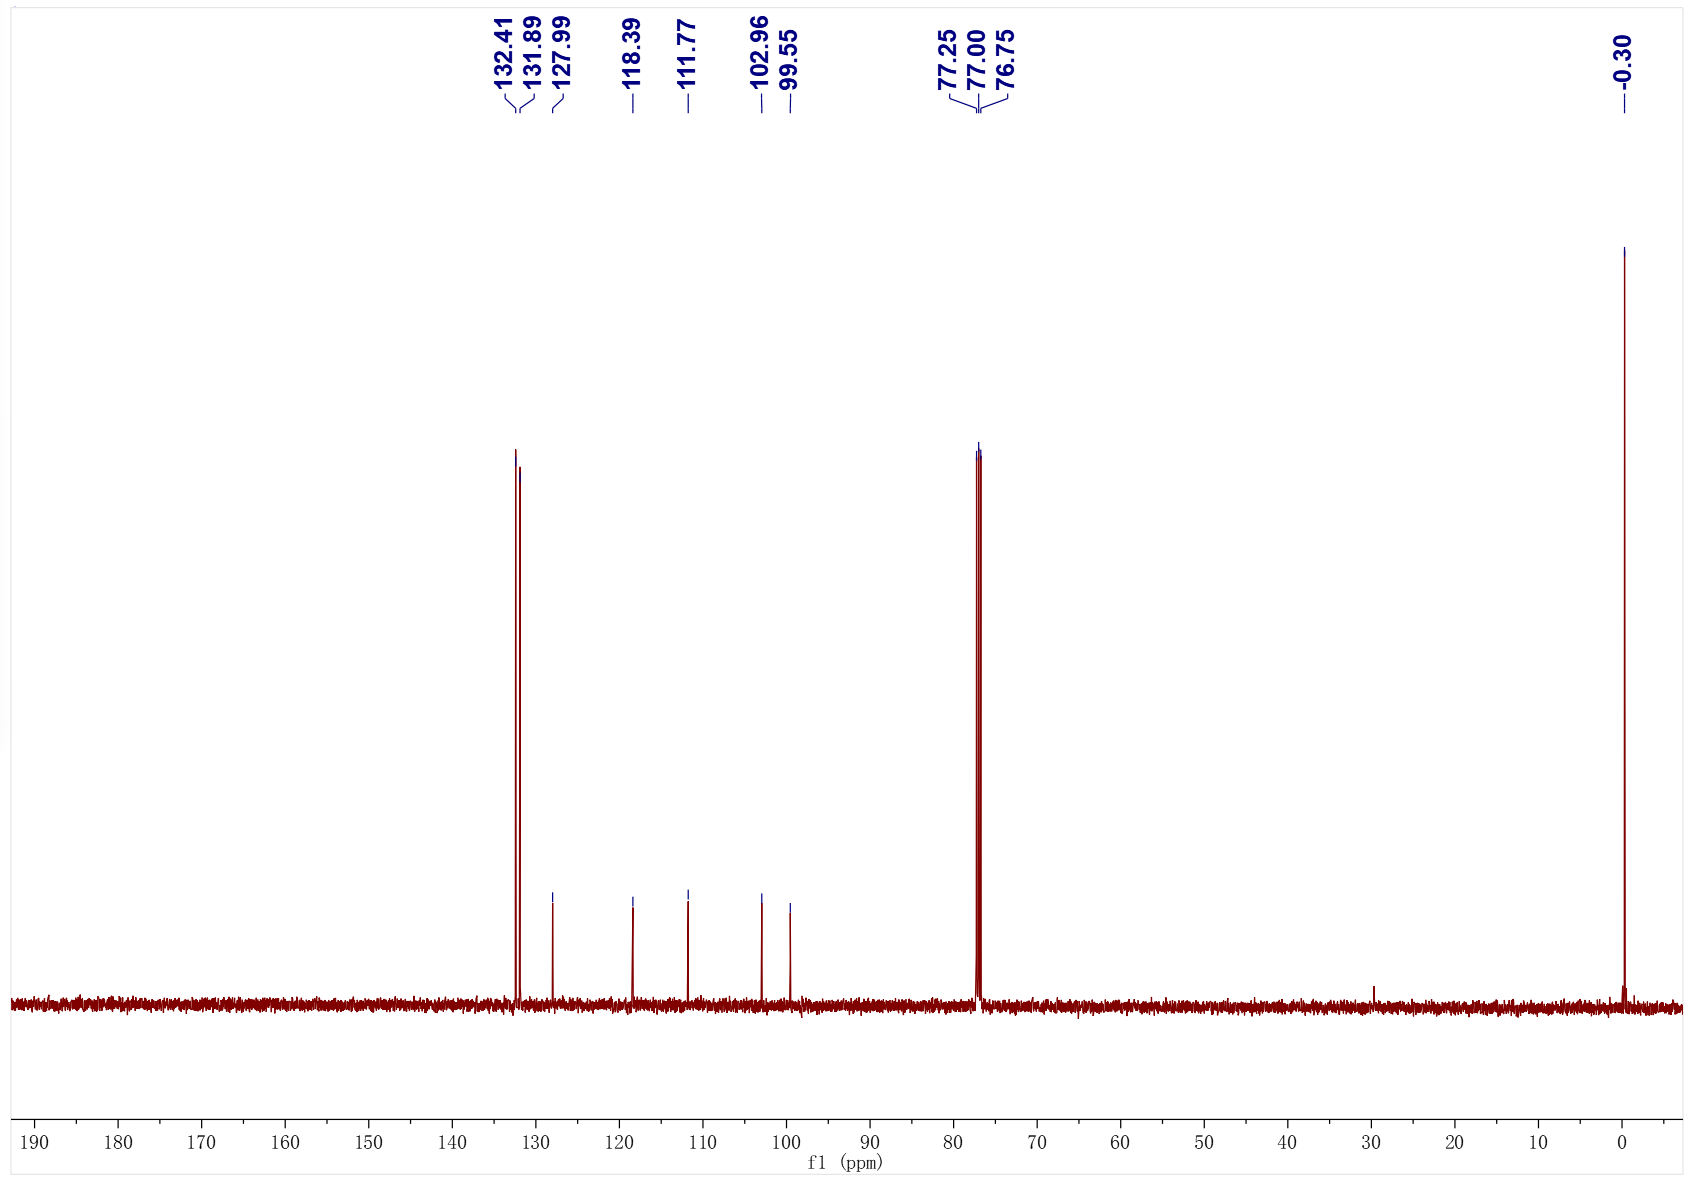


**3n; 1H NMR (500 MHz, CDCl3); 13C NMR (126 MHz, CDCl3)**


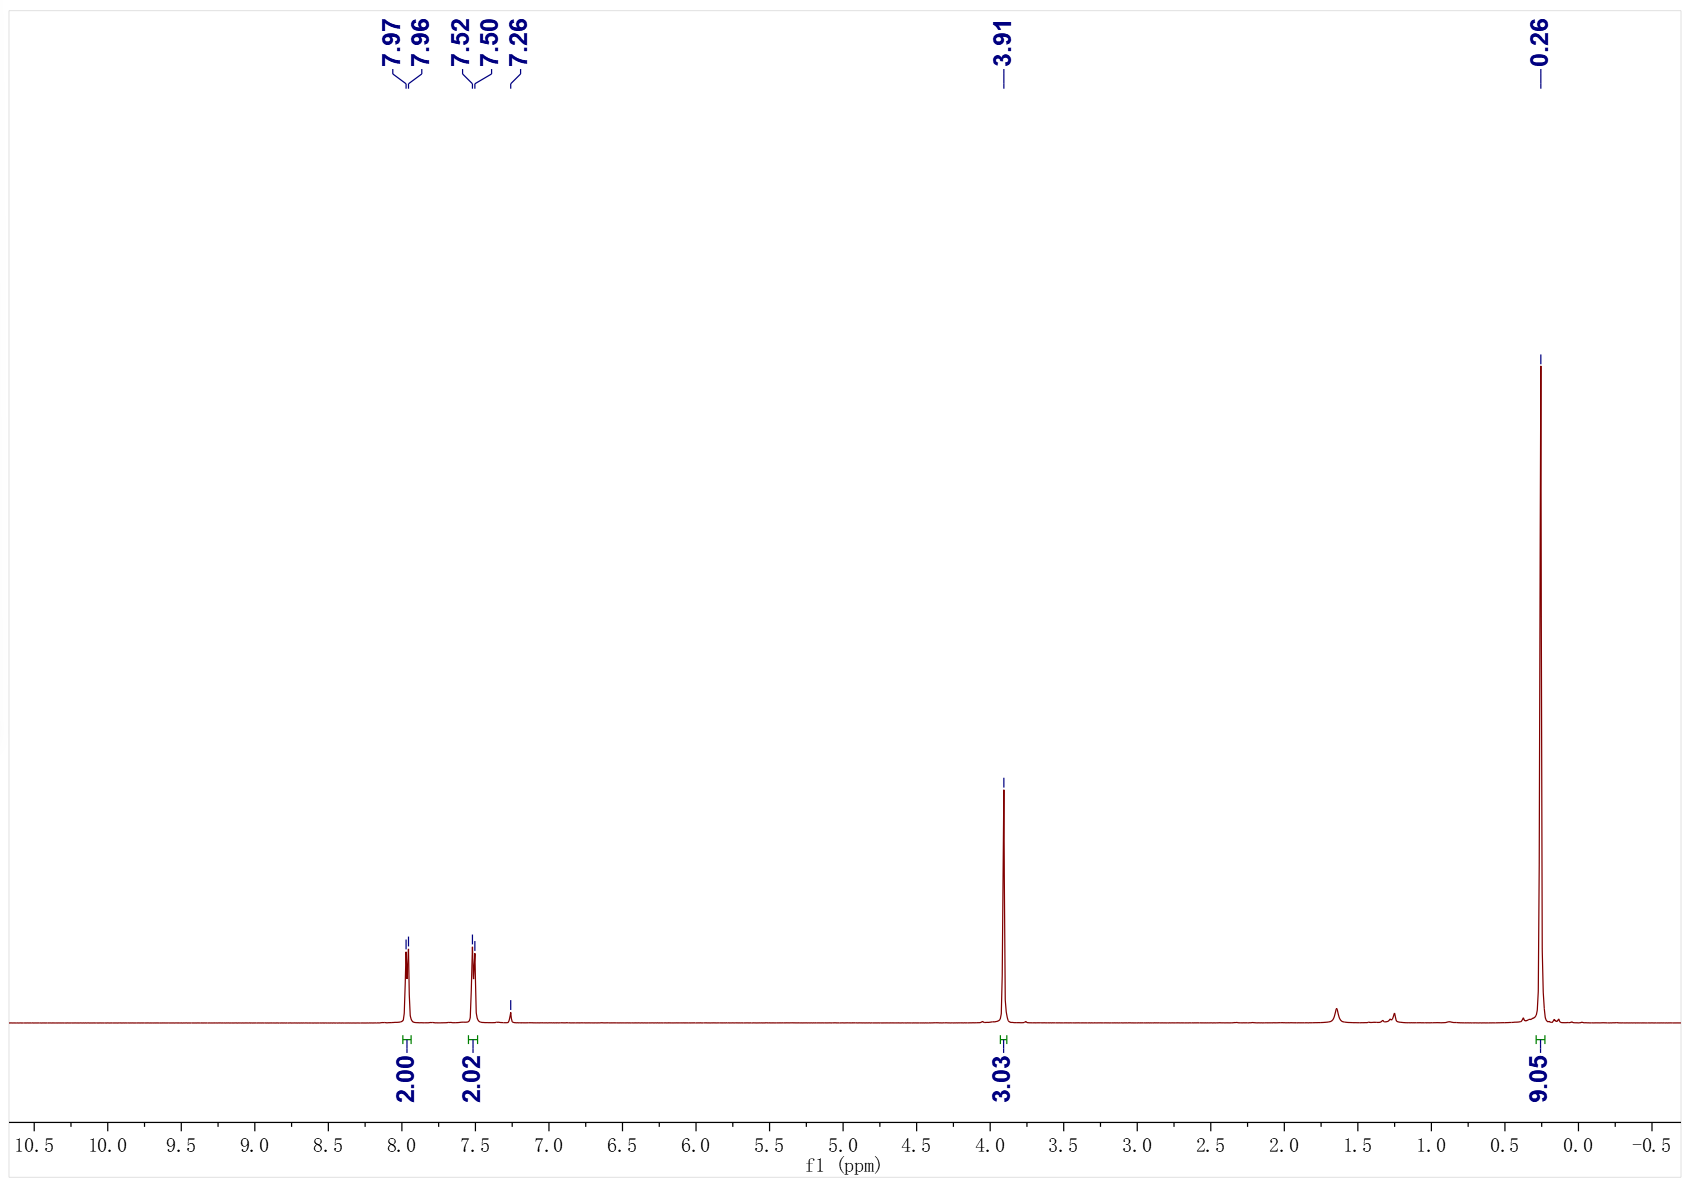

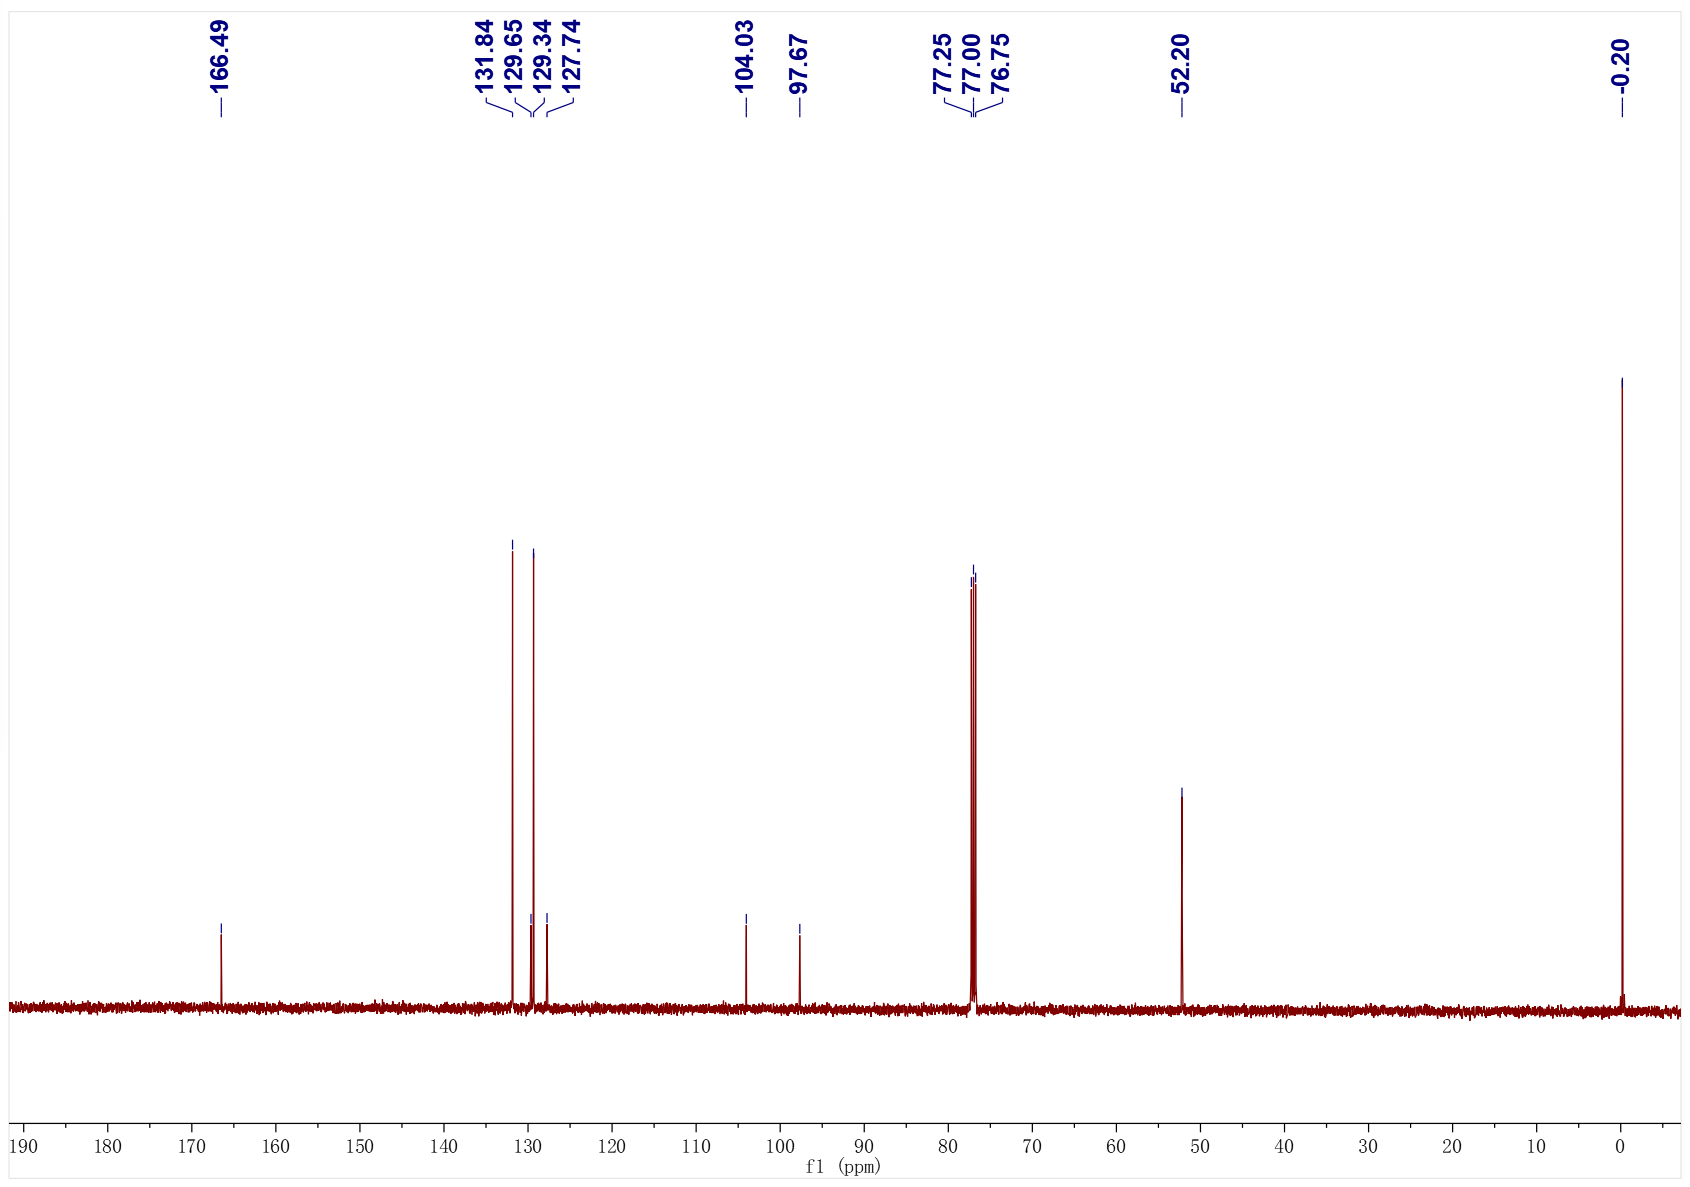


**3o; 1H NMR (500 MHz, CDCl3); 13C NMR (126 MHz, CDCl3)**


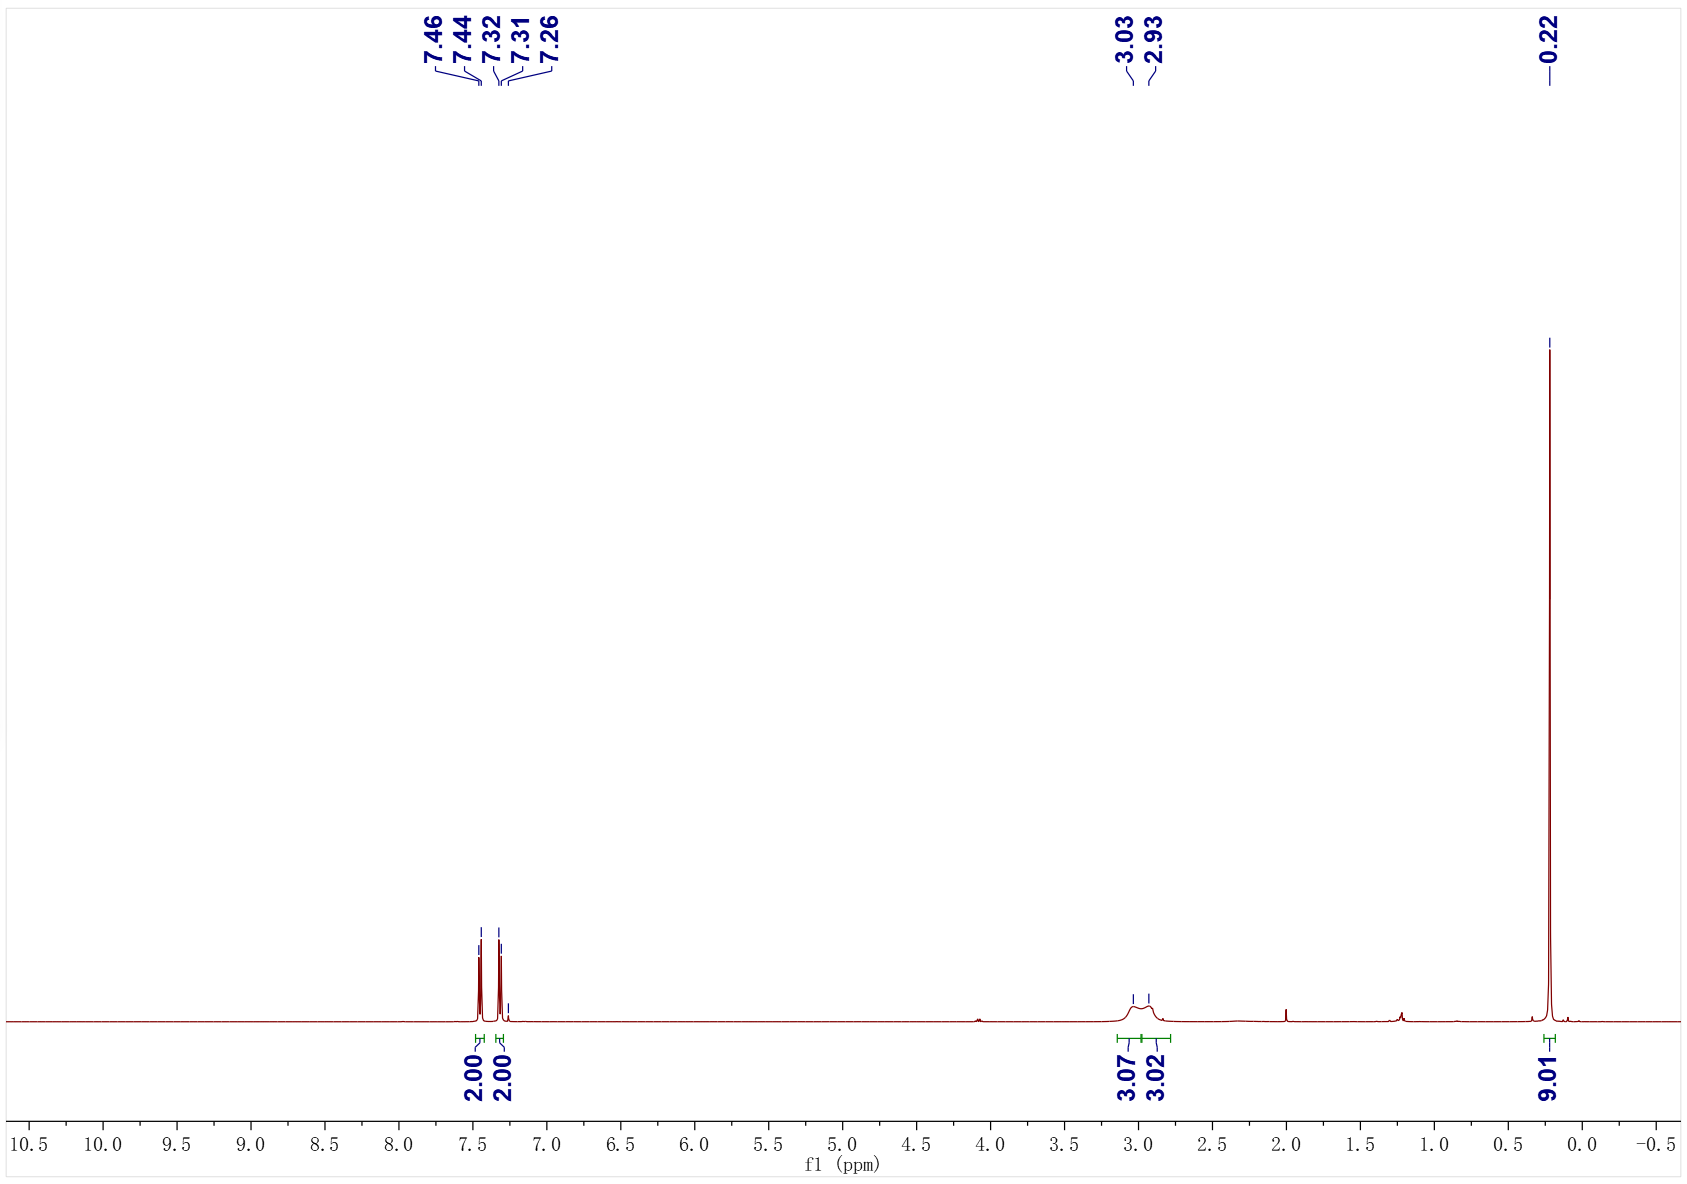

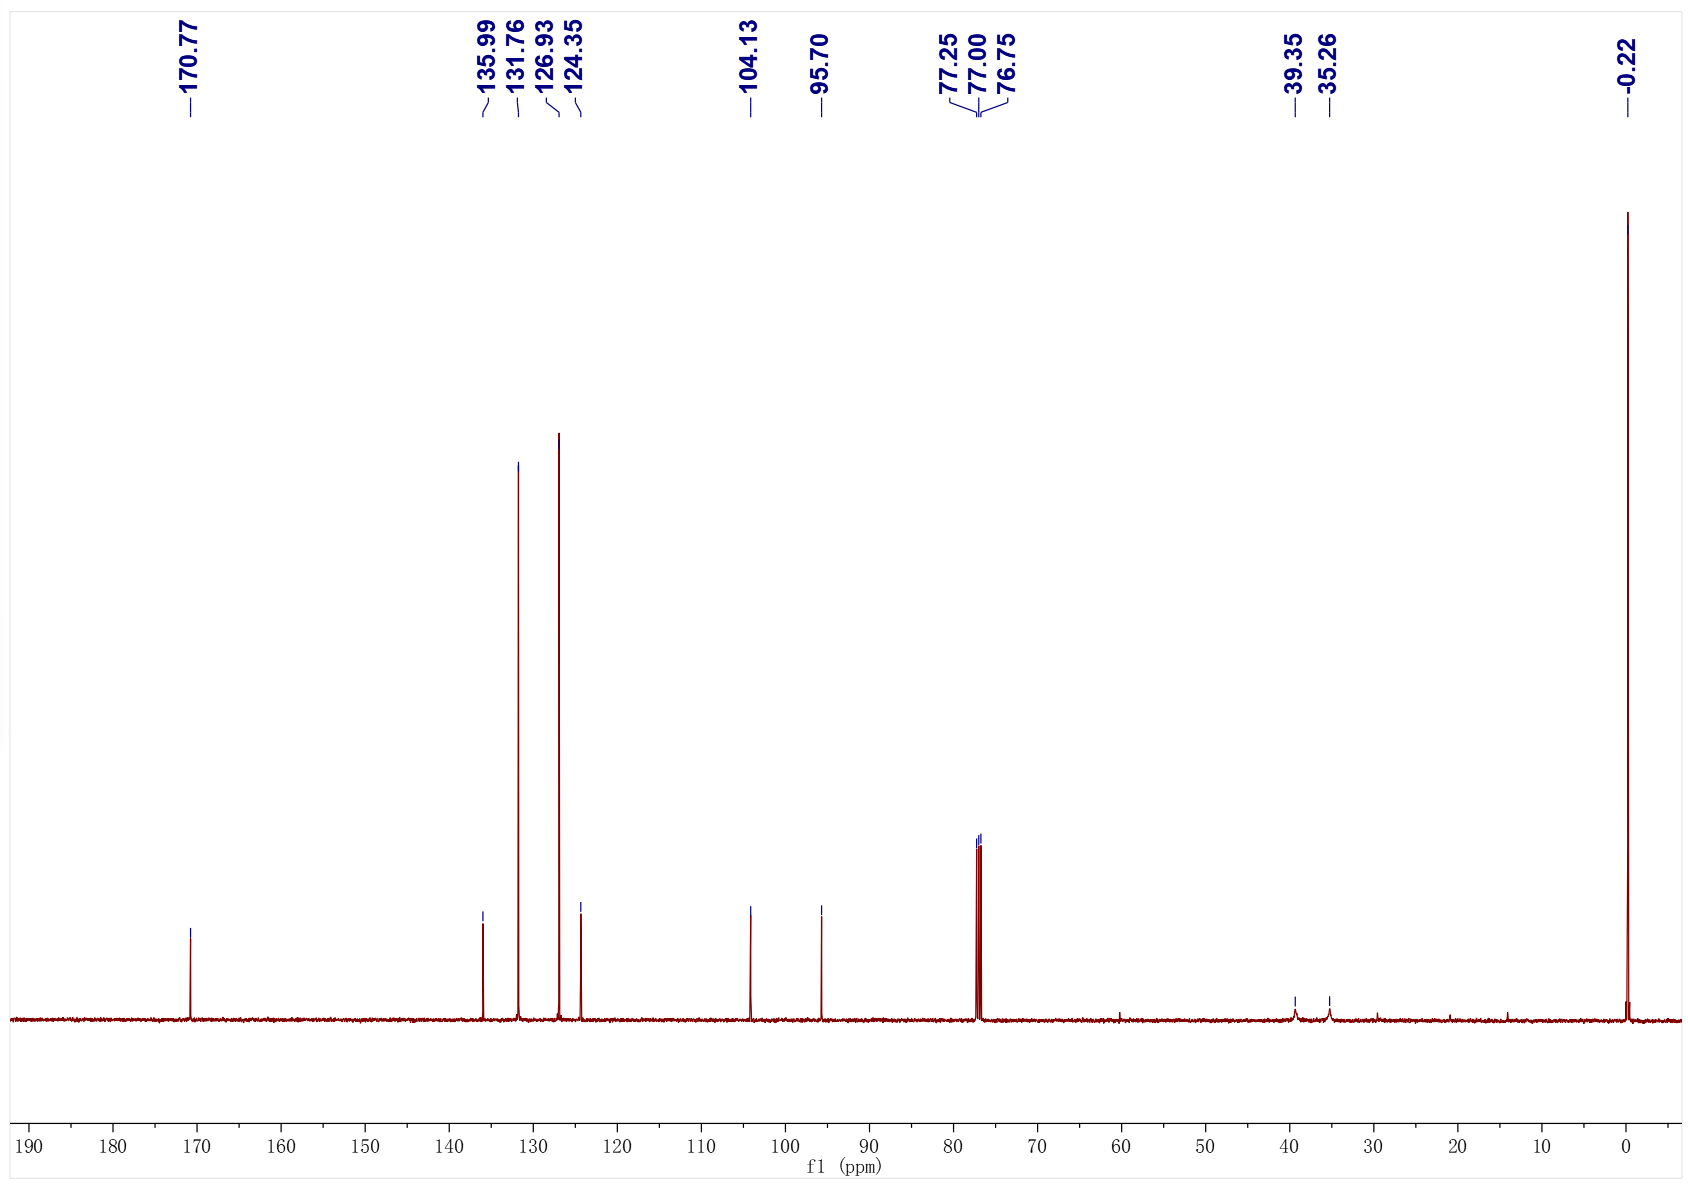


**3p; 1H NMR (500 MHz, CDCl3); 13C NMR (126 MHz, CDCl3)**


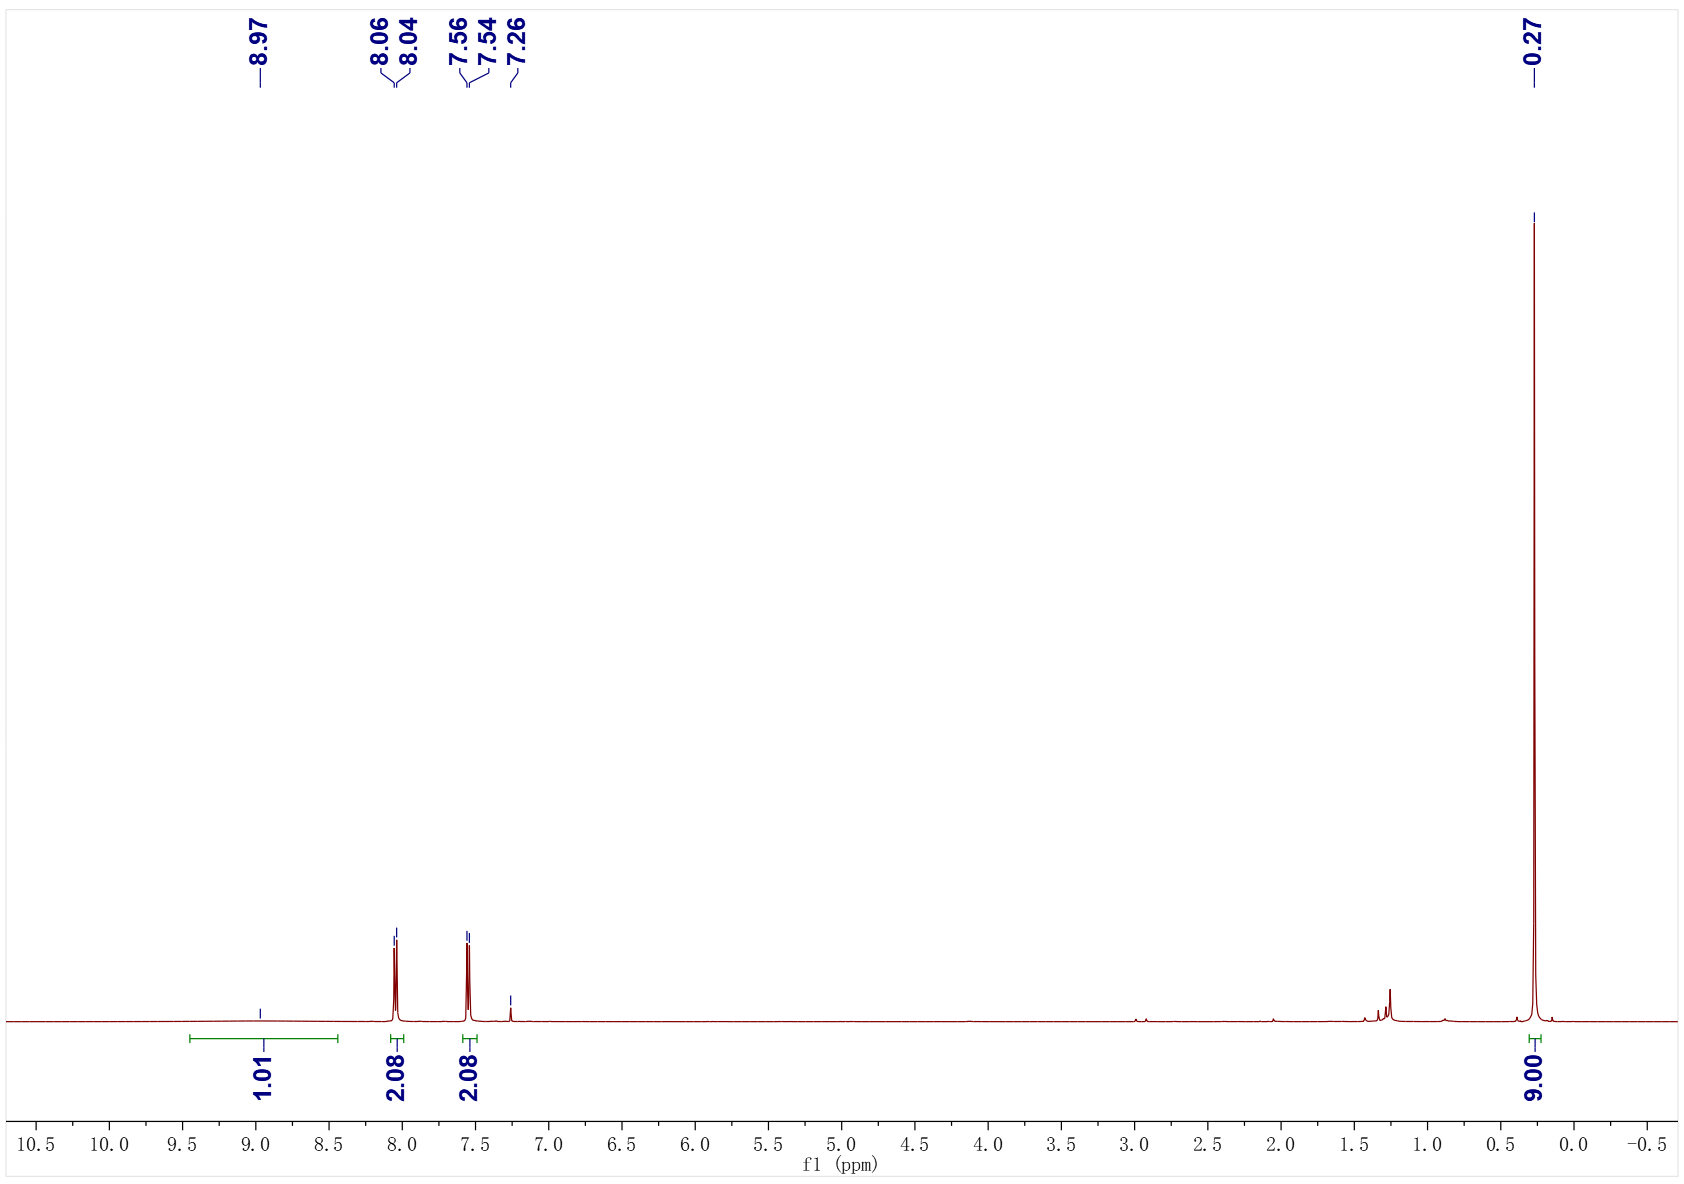

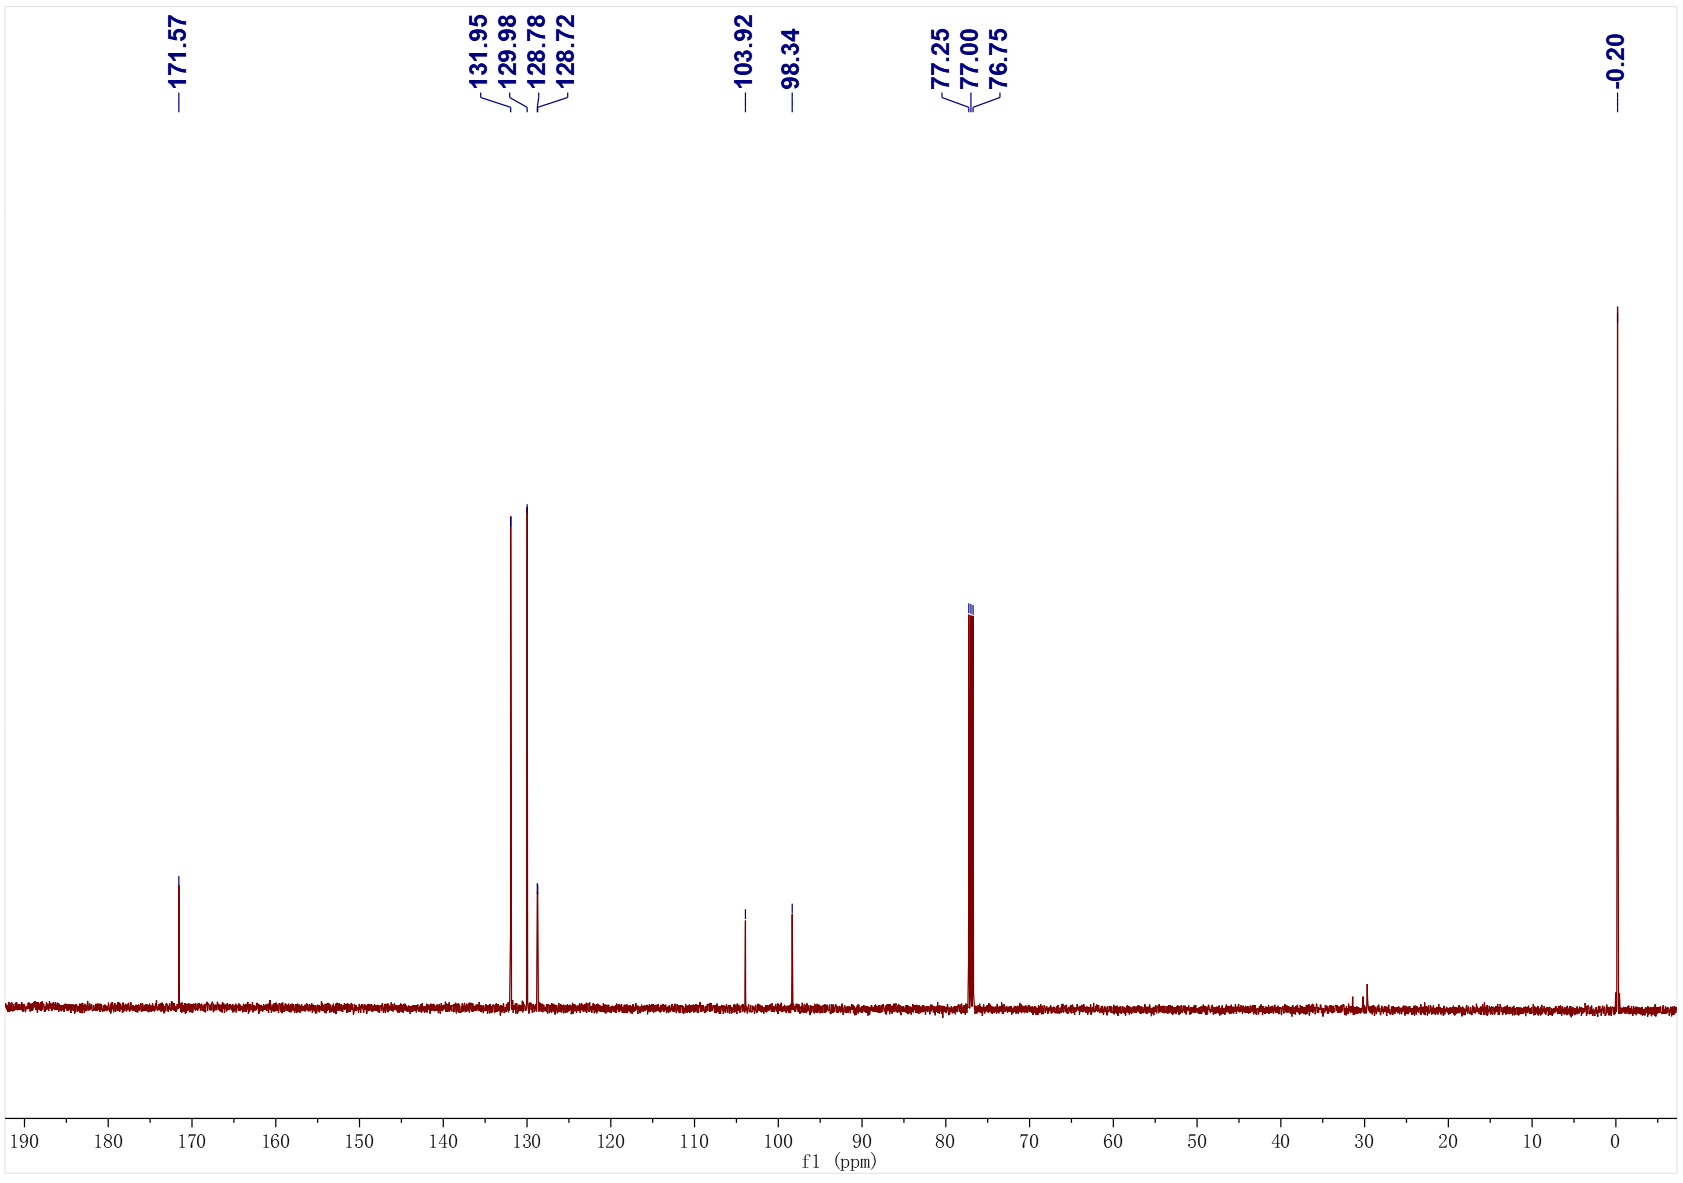


**3q; 1H NMR (500 MHz, CDCl3); 13C NMR (126 MHz, CDCl3)**


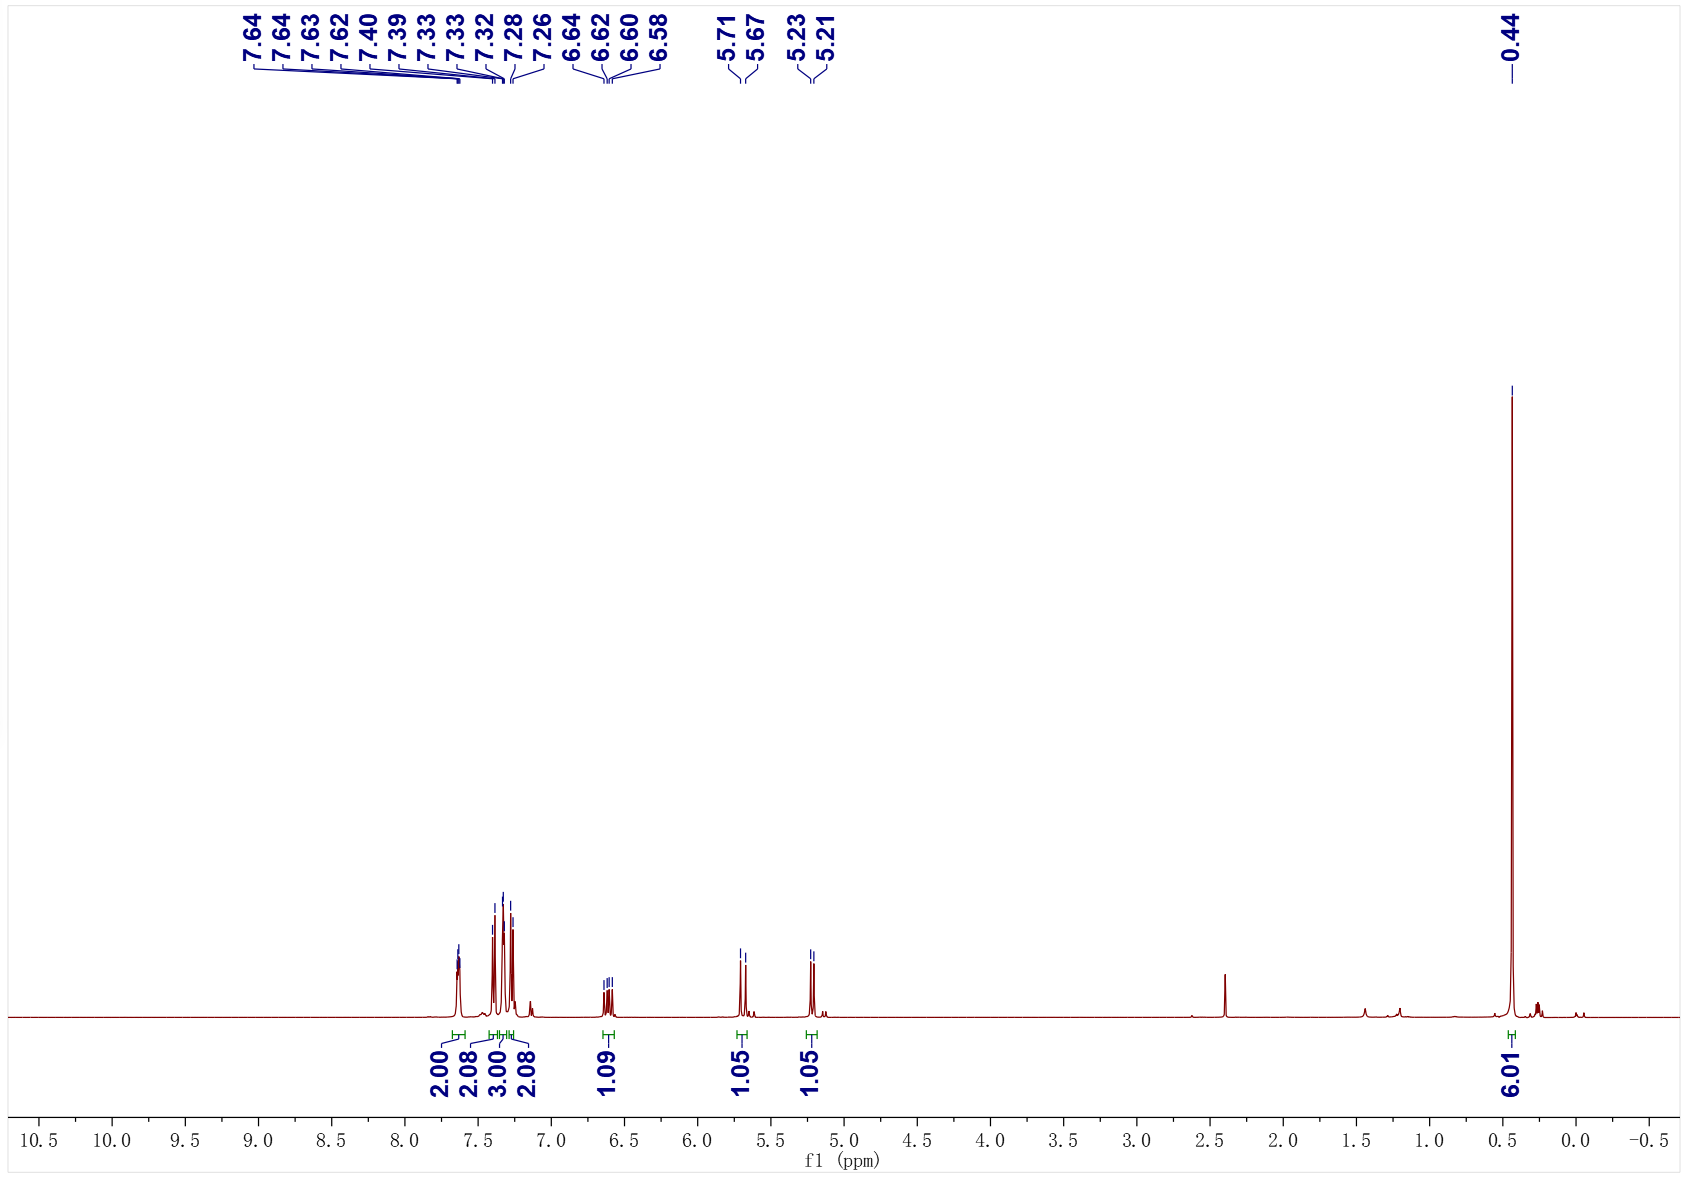

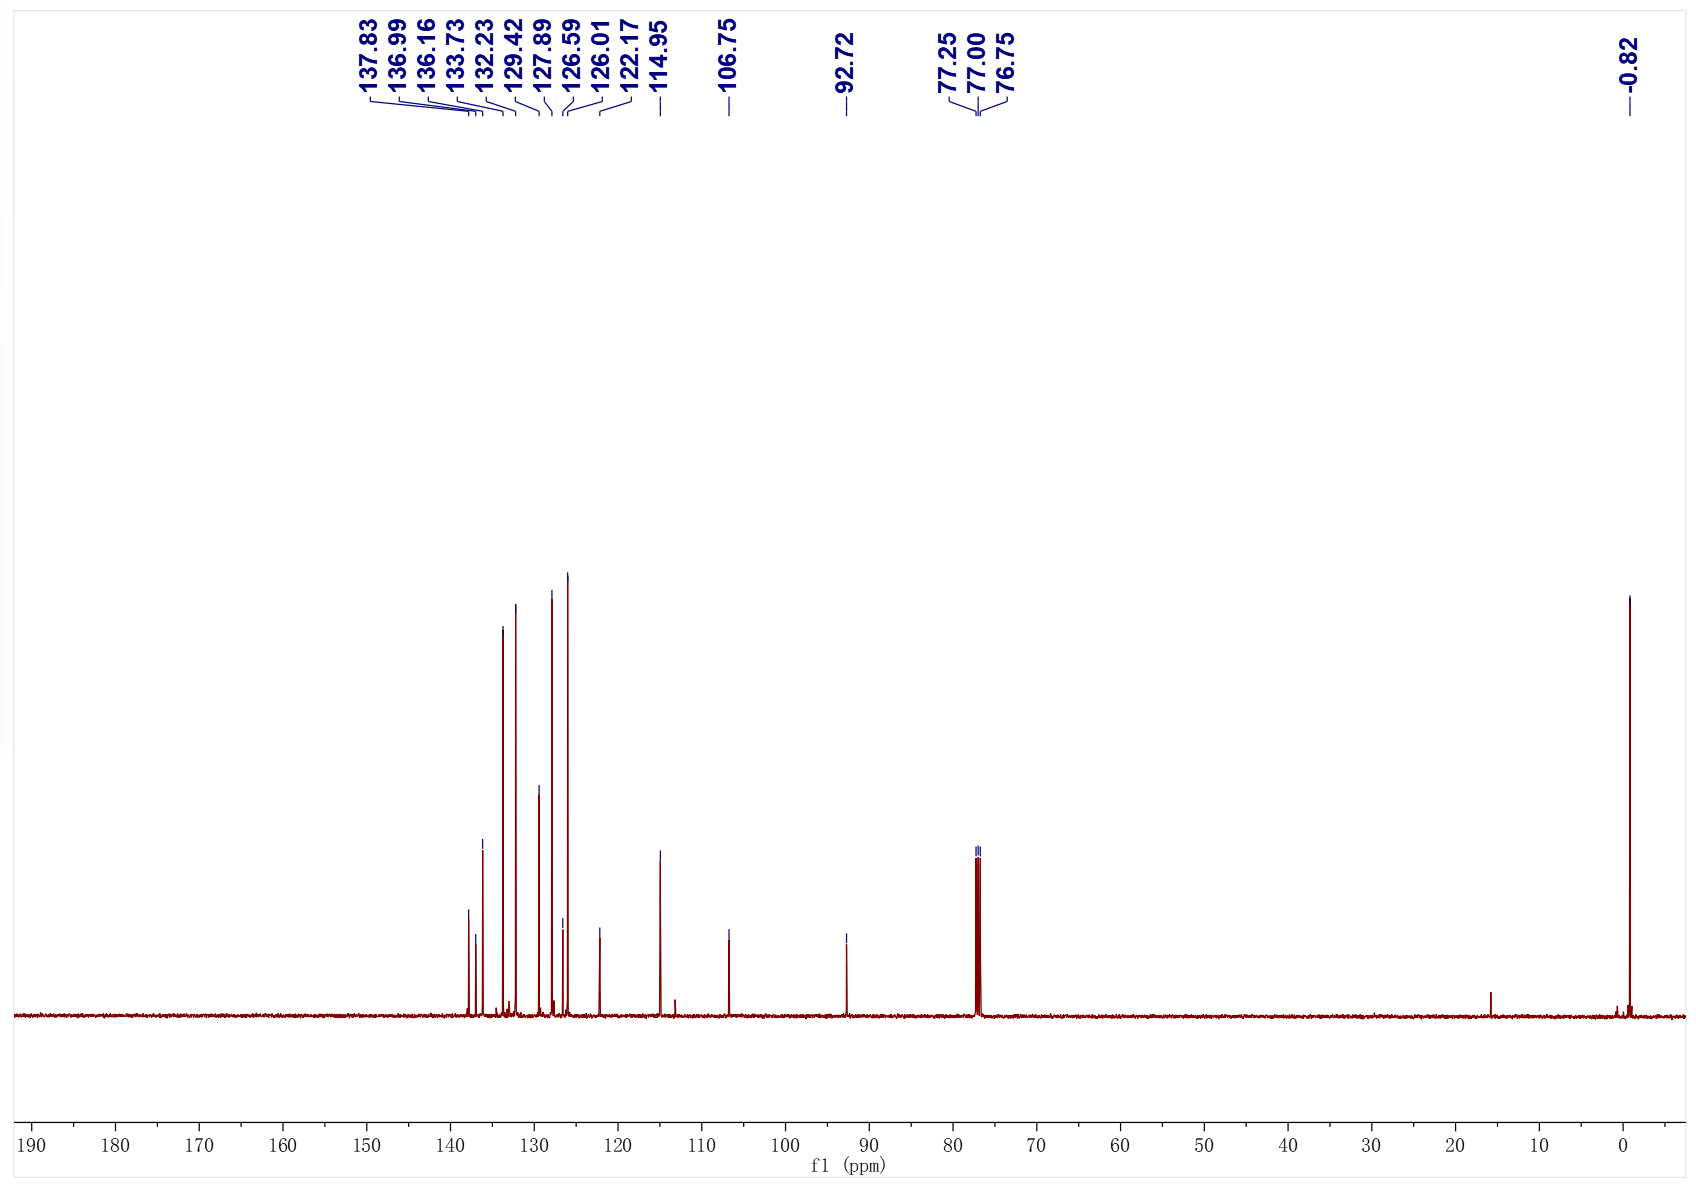


**3r; 1H NMR (400 MHz, CDCl3); 13C NMR (126 MHz, CDCl3)**


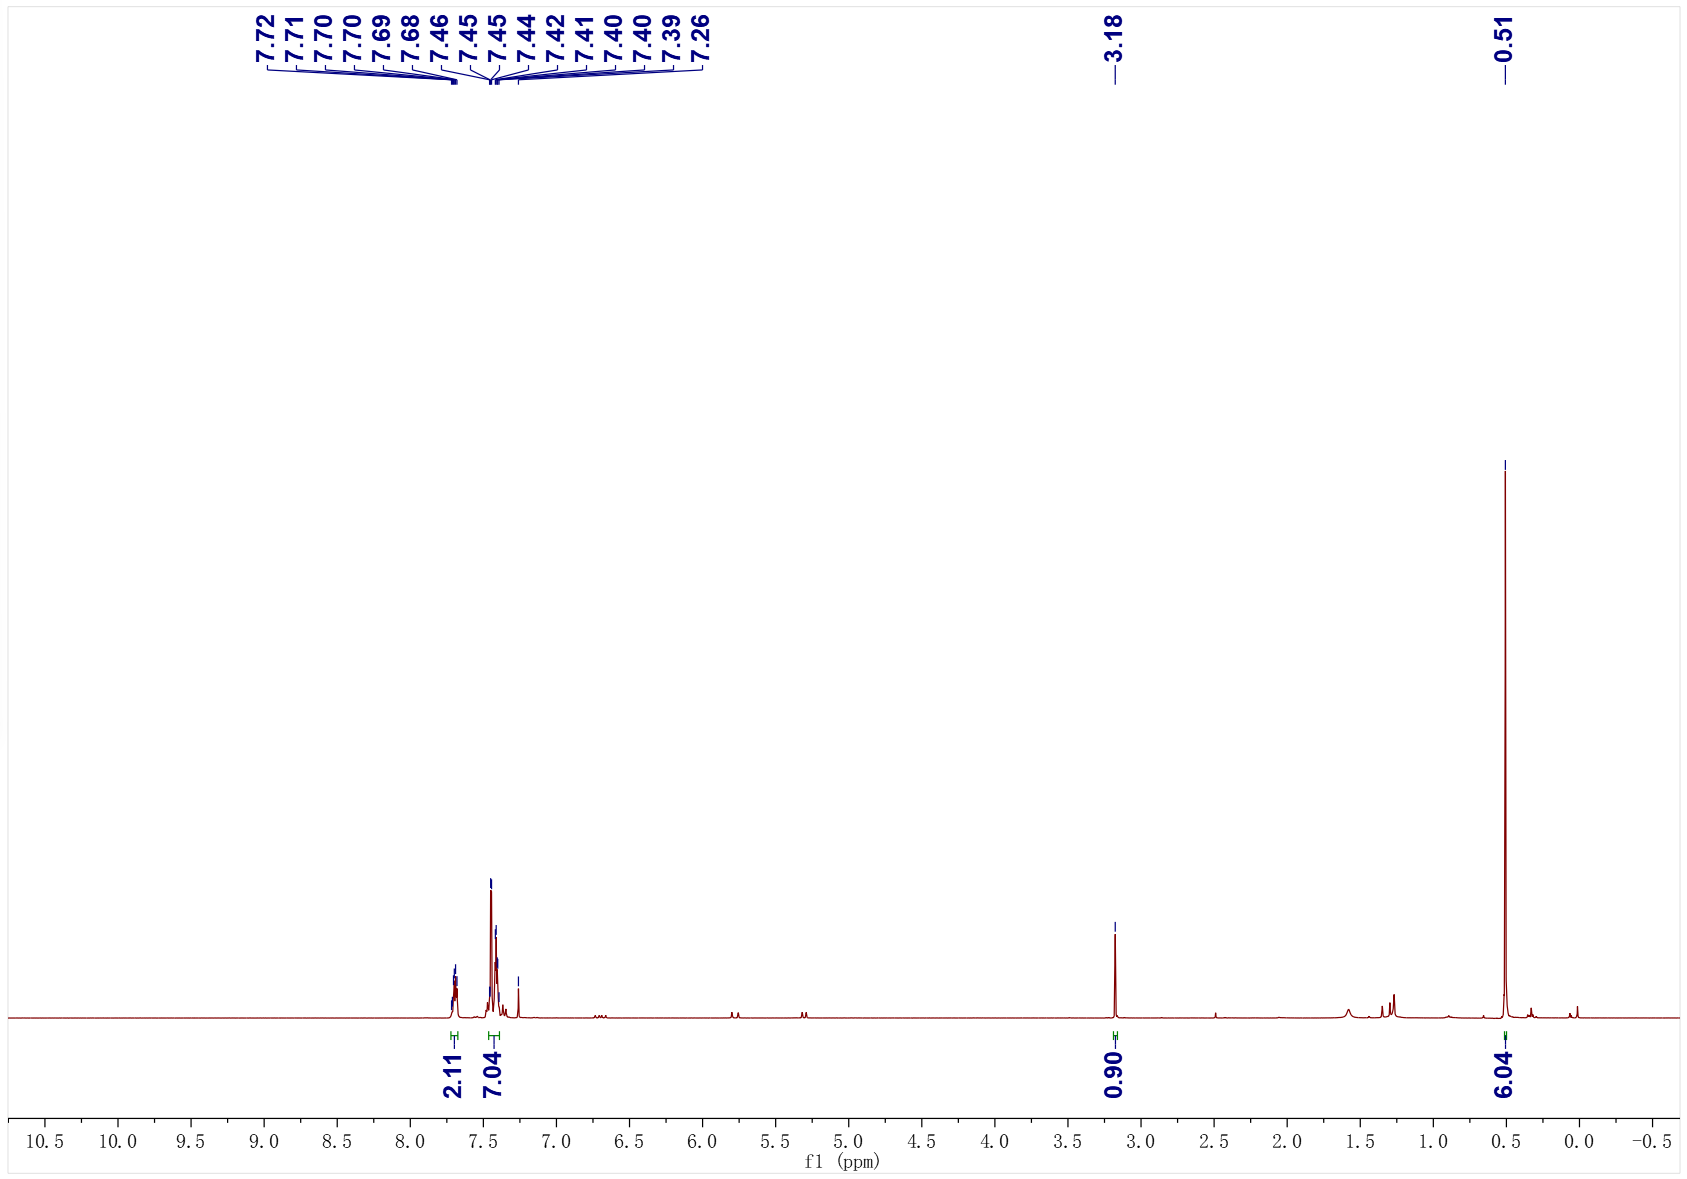

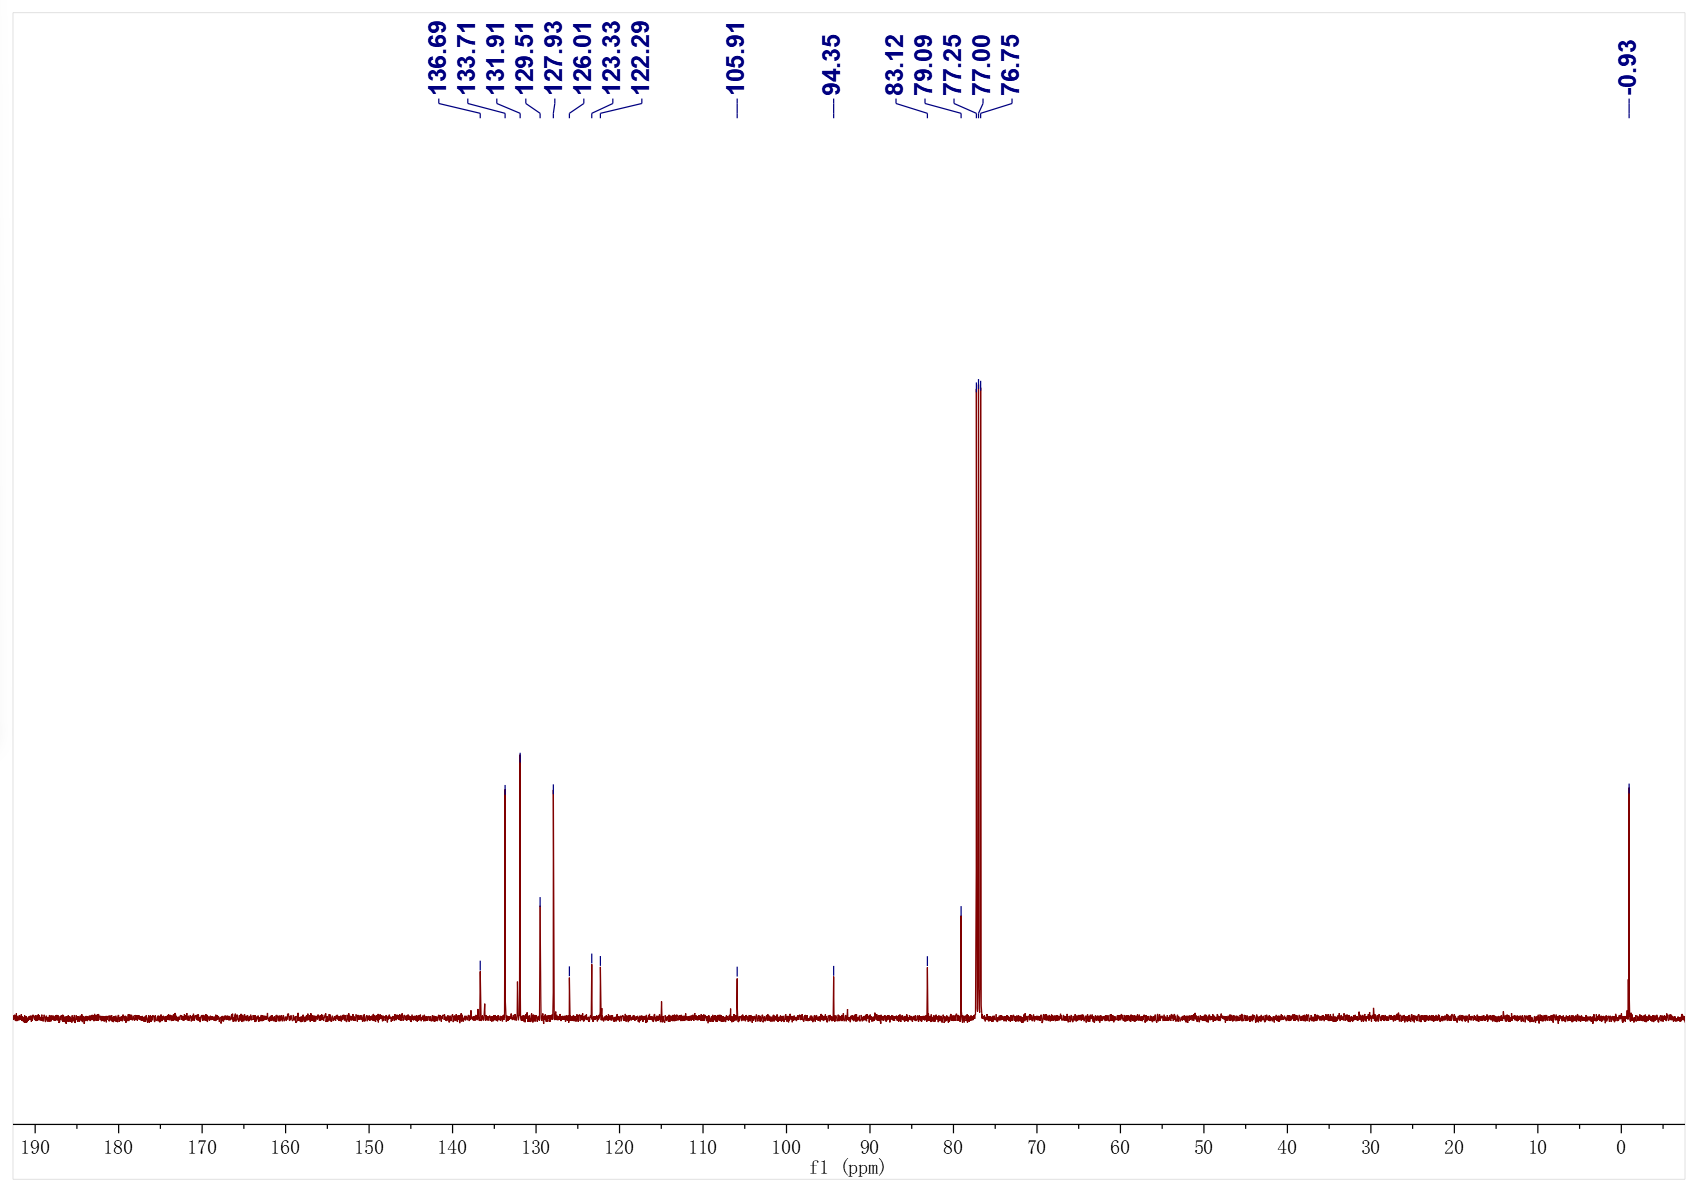


**3s; 1H NMR (400 MHz, CDCl3); 13C NMR (126 MHz, CDCl3)**


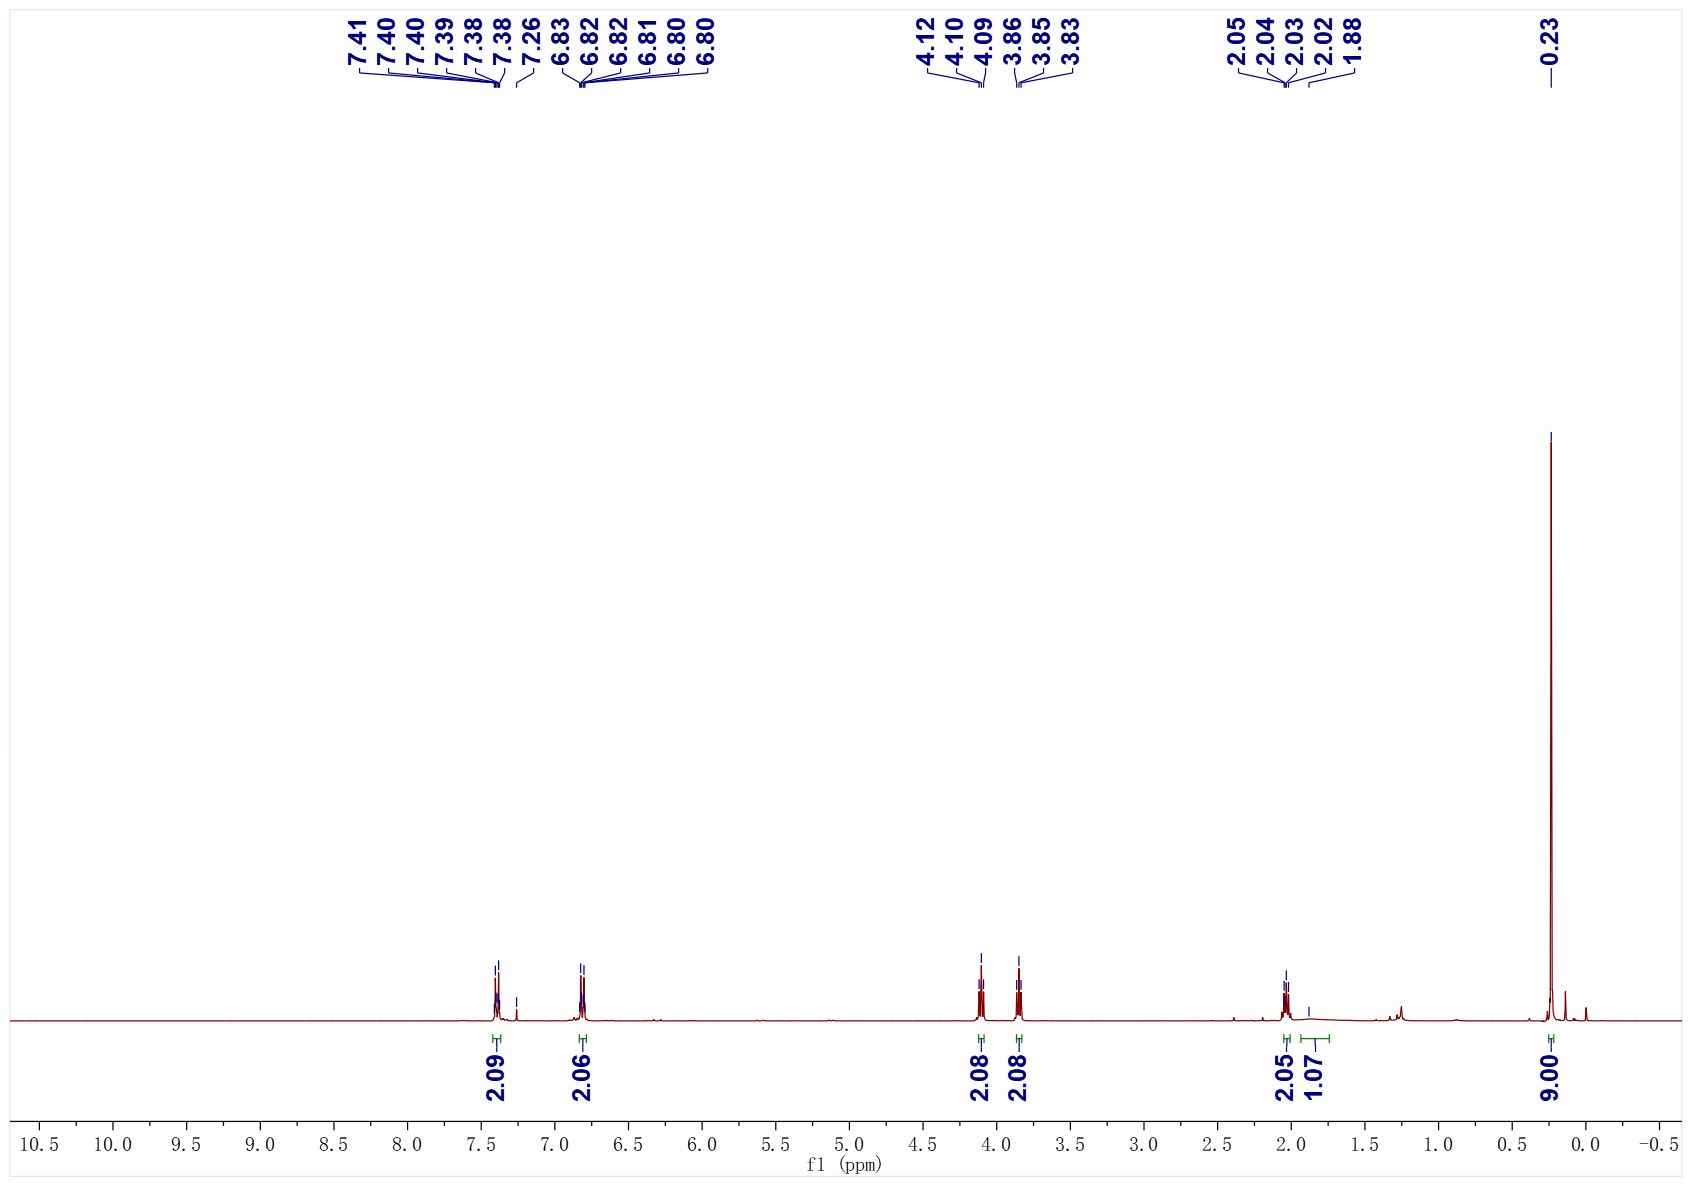

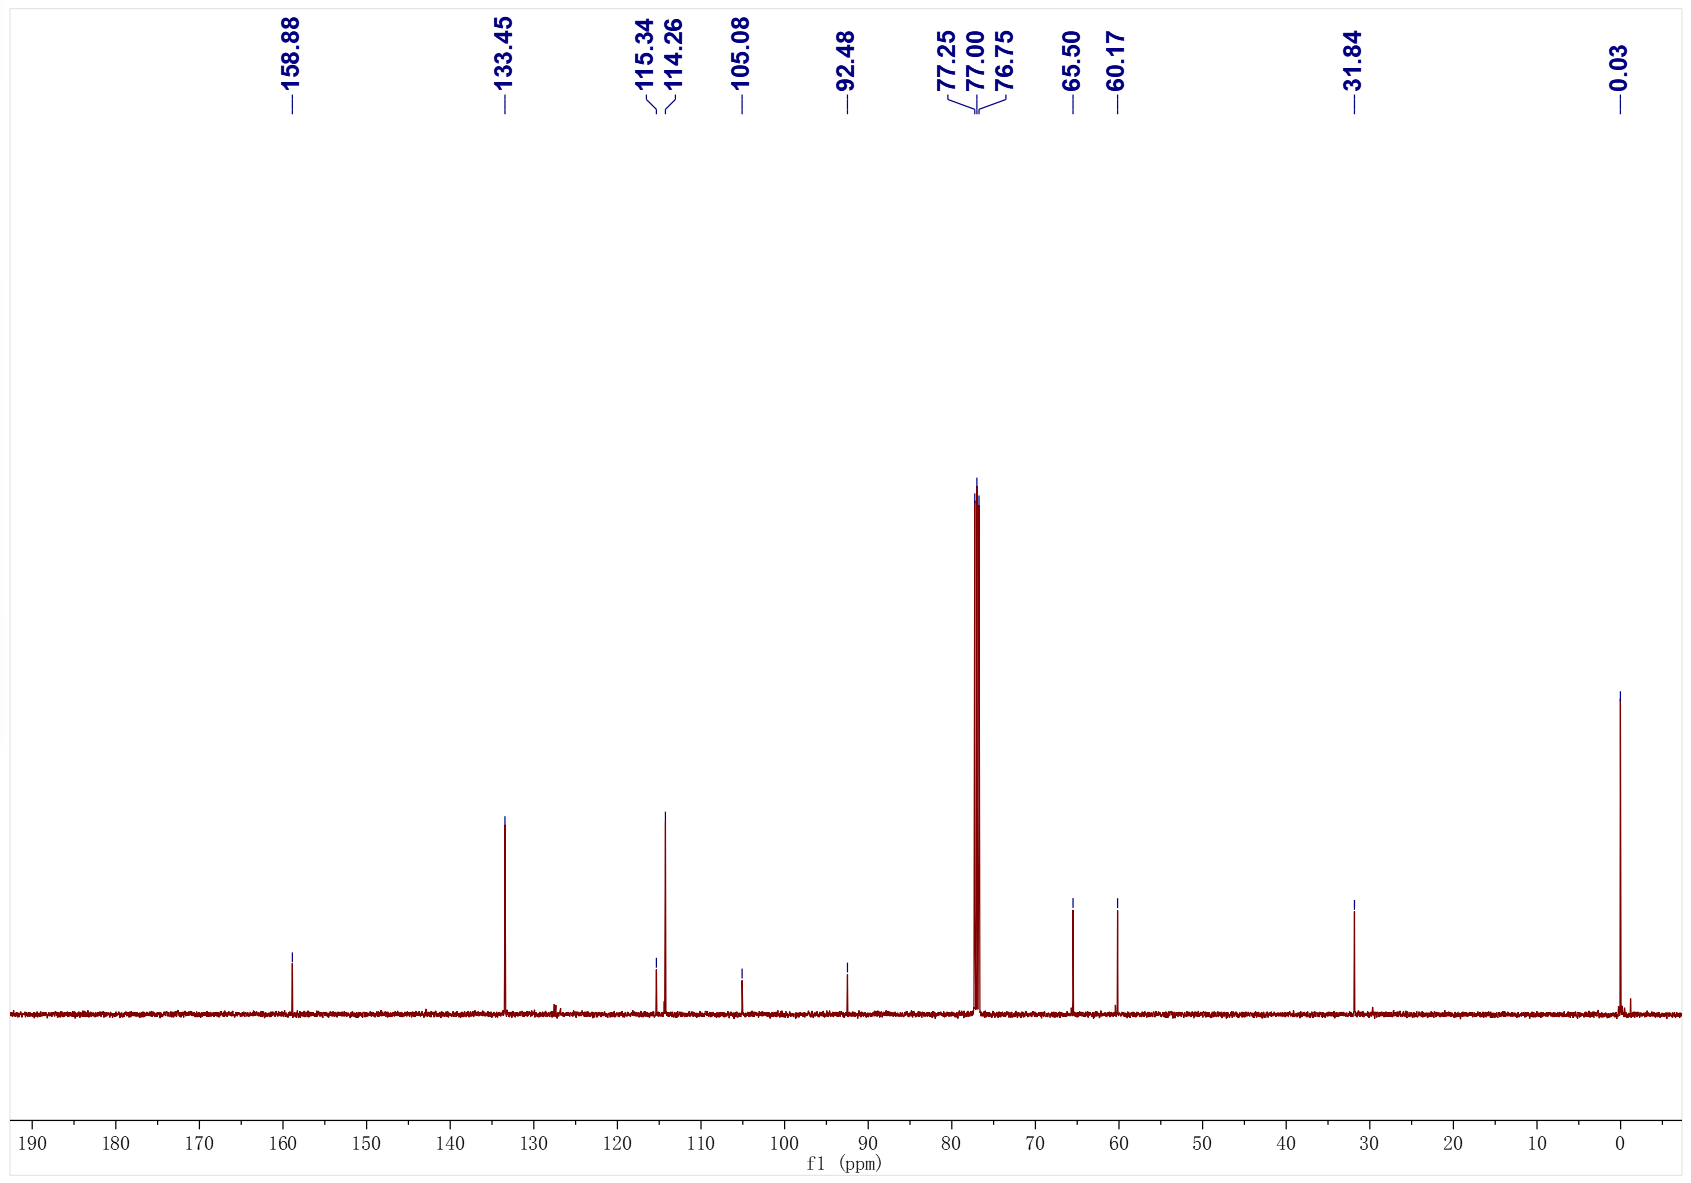


**3t; 1H NMR (500 MHz, CDCl3); 13C NMR (126 MHz, CDCl3)**


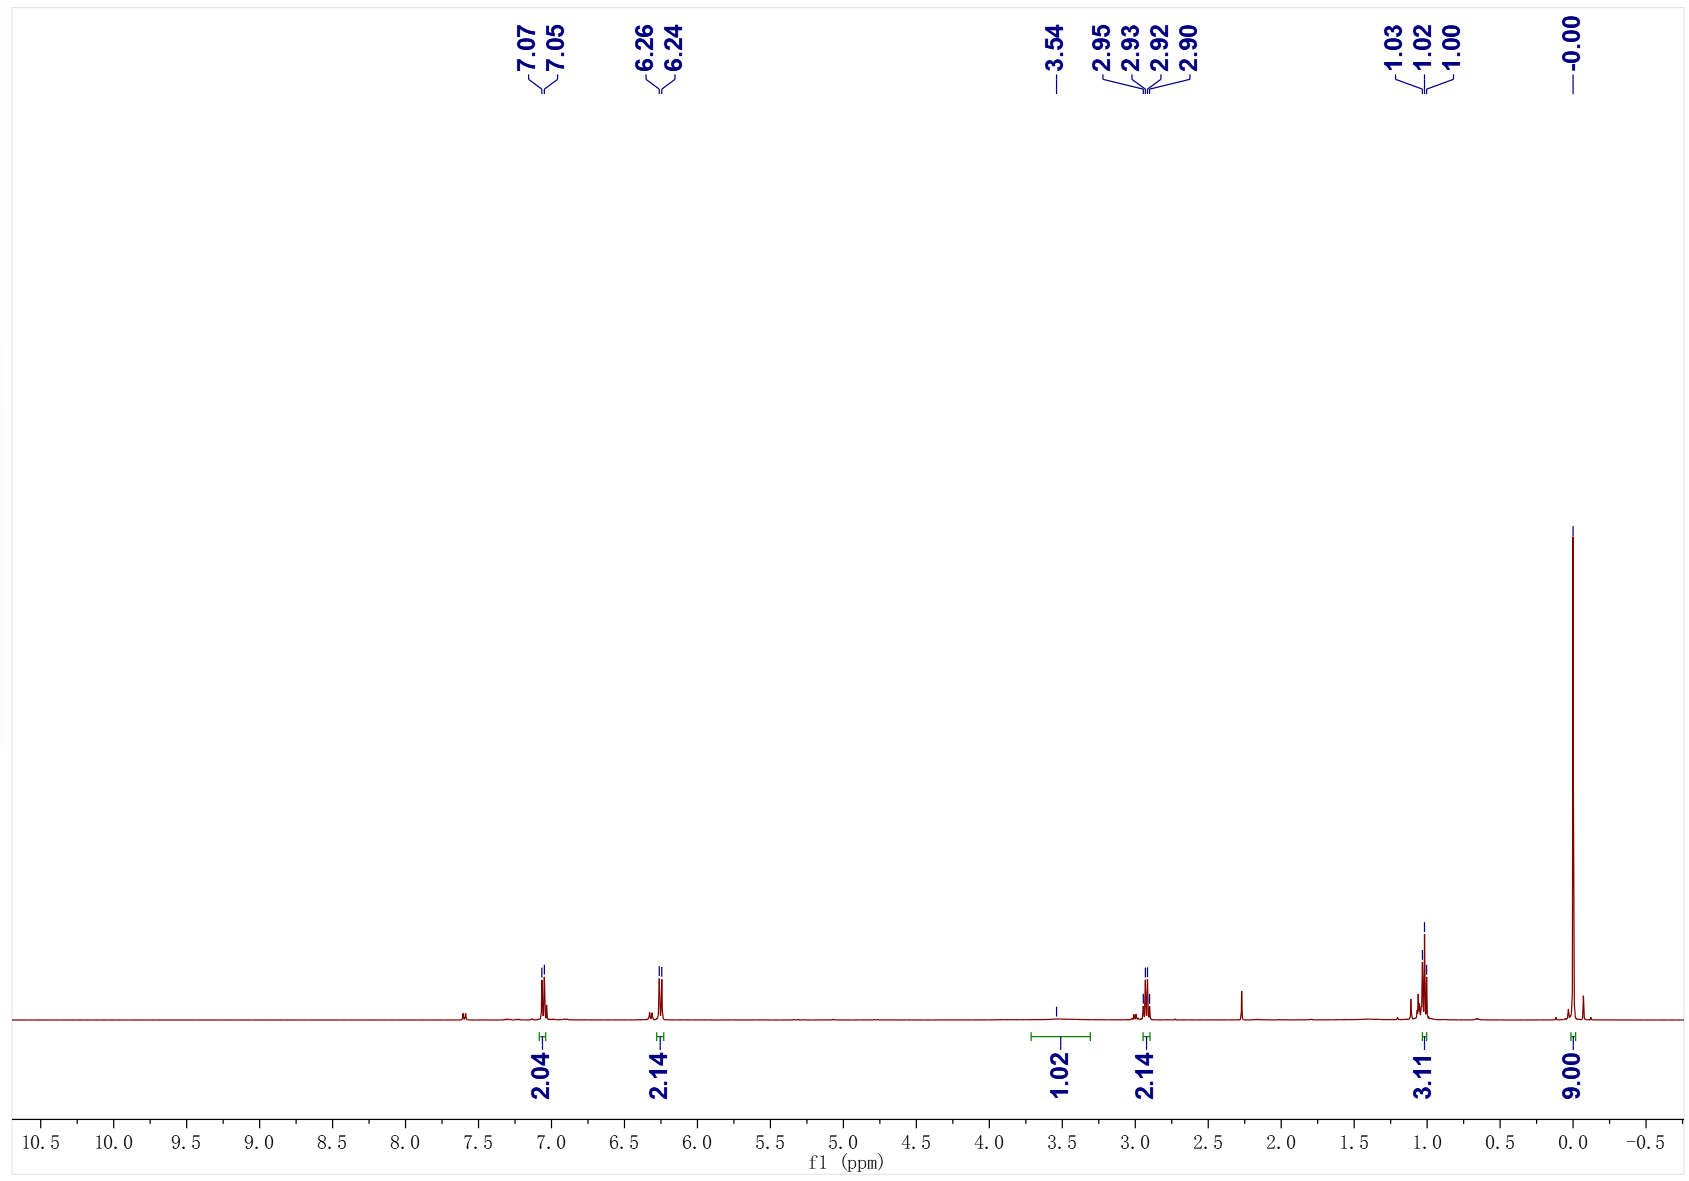


**3u; 1H NMR (500 MHz, CDCl3); 13C NMR (126 MHz, CDCl3)**

**3v; 1H NMR (400 MHz, CDCl3); 13C NMR (101 MHz, CDCl3)**

**3w; 1H NMR (400 MHz, CDCl3); 13C NMR (101 MHz, CDCl3)**

**3x; 1H NMR (400 MHz, CDCl3); 13C NMR (101 MHz, CDCl3)**

**3y; 1H NMR (500 MHz, CDCl3); 13C NMR (126 MHz, CDCl3)**

**3z; 1H NMR (500 MHz, CDCl3); 13C NMR (126 MHz, CDCl3)**

**3aa; 1H NMR (500 MHz, CDCl3); 13C NMR (126 MHz, CDCl3)**

**3ab; 1H NMR (400 MHz, CDCl3); 13C NMR (126 MHz, CDCl3)**

**3ac; 1H NMR (500 MHz, CDCl3); 13C NMR (126 MHz, CDCl3)**

**3ad; 1H NMR (500 MHz, CDCl3); 13C NMR (126 MHz, CDCl3)**

**3ae; 1H NMR (500 MHz, CDCl3); 13C NMR (126 MHz, CDCl3)**

**3af; 1H NMR (500 MHz, CDCl3); 13C NMR (126 MHz, CDCl3)**

**3ag; 1H NMR (500 MHz, CDCl3); 13C NMR (126 MHz, CDCl3)**

**3ah; 1H NMR (500 MHz, CDCl3); 13C NMR (126 MHz, CDCl3)**

**3ai; 1H NMR (500 MHz, CDCl3); 13C NMR (126 MHz, CDCl3)**

**3aj; 1H NMR (500 MHz, CDCl3); 13C NMR (126 MHz, CDCl3)**

**3ak; 1H NMR (500 MHz, CDCl3); 13C NMR (126 MHz, CDCl3)**

**3al; 1H NMR (500 MHz, CDCl3); 13C NMR (126 MHz, CDCl3)**

**3am; 1H NMR (500 MHz, CDCl3); 13C NMR (126 MHz, CDCl3)**

**3an; 1H NMR (500 MHz, CDCl3); 13C NMR (126 MHz, CDCl3)**

**3ao; 1H NMR (500 MHz, CDCl3); 13C NMR (126 MHz, CDCl3)**

**3ap; 1H NMR (500 MHz, CDCl3); 13C NMR (126 MHz, CDCl3)**

**3aq; 1H NMR (500 MHz, CDCl3); 13C NMR (126 MHz, CDCl3)**

**3ar; 1H NMR (500 MHz, CDCl3); 13C NMR (126 MHz, CDCl3)**

**3as; 1H NMR (500 MHz, CDCl3); 13C NMR (126 MHz, CDCl3)**

**3at; 1H NMR (500 MHz, CDCl3); 13C NMR (126 MHz, CDCl3)**

**3au; 1H NMR (400 MHz, CDCl3); 13C NMR (101 MHz, CDCl3)**

**3av; 1H NMR (400 MHz, CDCl3); 13C NMR (101 MHz, CDCl3)**

**3aw; 1H NMR (500 MHz, CDCl3); 13C NMR (126 MHz, CDCl3)**

**3aw; 19F NMR (471 MHz, CDCl3)**

**3ax; 1H NMR (500 MHz, CDCl3); 13C NMR (126 MHz, CDCl3)**

**3ax; 19F NMR (471 MHz, CDCl3)**

**3ay; 1H NMR (500 MHz, CDCl3); 13C NMR (126 MHz, CDCl3)**

**3az; 1H NMR (500 MHz, CDCl3); 13C NMR (126 MHz, CDCl3)**

**3ba; 1H NMR (500 MHz, CDCl3); 13C NMR (126 MHz, CDCl3)**

**3ba; 19F NMR (471 MHz, CDCl3)**

**3bb; 1H NMR (400 MHz, CDCl3); 13C NMR (126 MHz, CDCl3)**

**3bb; 19F NMR (376 MHz, CDCl3)**

**3bc; 1H NMR (500 MHz, CDCl3); 13C NMR (126 MHz, CDCl3)**

**3bc; 19F NMR (471 MHz, CDCl3)**

**3bd; 1H NMR (500 MHz, CDCl3); 13C NMR (126 MHz, CDCl3)**

**3be; 1H NMR (500 MHz, CDCl3); 13C NMR (126 MHz, CDCl3)**

**4a; 1H NMR (500 MHz, CDCl3); 13C NMR (126 MHz, CDCl3)**

**4b; 1H NMR (500 MHz, CDCl3); 13C NMR (126 MHz, CDCl3)**

**4c; 1H NMR (500 MHz, CDCl3); 13C NMR (126 MHz, CDCl3)**

**4d; 1H NMR (500 MHz, CDCl3); 13C NMR (126 MHz, CDCl3)**

**4e; 1H NMR (500 MHz, CDCl3); 13C NMR (126 MHz, CDCl3)**

**4f; 1H NMR (500 MHz, CDCl3); 13C NMR (126 MHz, CDCl3)**

**4g; 1H NMR (500 MHz, CDCl3); 13C NMR (126 MHz, CDCl3)**

**4h; 1H NMR (500 MHz, CDCl3); 13C NMR (126 MHz, CDCl3)**

**4i; 1H NMR (500 MHz, CDCl3); 13C NMR (126 MHz, CDCl3)**

**4j; 1H NMR (500 MHz, CDCl3); 13C NMR (126 MHz, CDCl3)**

**4k; 1H NMR (500 MHz, CDCl3); 13C NMR (126 MHz, CDCl3)**

**4l; 1H NMR (500 MHz, CDCl3); 13C NMR (126 MHz, CDCl3)**

**4m; 1H NMR (500 MHz, CDCl3); 13C NMR (126 MHz, CDCl3)**

**4n; 1H NMR (500 MHz, CDCl3); 13C NMR (126 MHz, CDCl3)**

**4o; 1H NMR (400 MHz, CDCl3); 13C NMR (126 MHz, CDCl3)**

**5a; 1H NMR (400 MHz, CDCl3); 13C NMR (126 MHz, CDCl3)**

**5b; 1H NMR (400 MHz, CDCl3); 13C NMR (101 MHz, CDCl3)**

**5c; 1H NMR (400 MHz, CDCl3); 13C NMR (101 MHz, CDCl3)**

**5d; 1H NMR (400 MHz, CDCl3); 13C NMR (101 MHz, CDCl3)**

**5e; 1H NMR (400 MHz, CDCl3); 13C NMR (101 MHz, CDCl3)**

**5f; 1H NMR (400 MHz, CDCl3); 13C NMR (101 MHz, CDCl3)**

**5g; 1H NMR (400 MHz, CDCl3); 13C NMR (101 MHz, CDCl3)**

**5h; 1H NMR (400 MHz, CDCl3); 13C NMR (101 MHz, CDCl3)**

**7. Reference**

[1] a) S. Chang, D. Xing, Y. Zheng, L. Huang, *Org. Lett.* **2023**, *25*, 5350-5355; b) D. Xing, M. Feng, Y. Zheng, B. Huang, H. Jiang, L. Huang, *Org. Chem. Front.* **2023**, *10*, 3603-3611; c) Y. Cao, Y. Huang, P. R. Blakemore, *Eur. J. Org. Chem.* **2022**, e202200498; d) P. E. Simm, P. Sekar, J. Richardson, P. W. Davies, *ACS Catal.* **2021**, *11*, 6357-6362; e) K. Kanemoto, S. Yoshida, T. Hosoya, *Org. Lett.* **2019**, *21*, 3172-3177.

[2] J.-L. Tu, H. Gao, M. Luo, L. Zhao, C. Yang, L. Guo, W. Xia, *Green Chem.* **2022**, *24*, 5553-5558.

[3] W. Liu, Z. Chen, L. Li, H. Wang, C.-J. Li, *Chem. Eur. J.* **2016**, *22*, 5888-5893.

[4] H. Helbert, P. Visser, J. G. H. Hermens, J. Buter, B. L. Feringa, *Nat. Catal.* **2020**, *3*, 664-671.

[5] J. Oliver-Meseguer, I. Dominguez, R. Gavara, A. Leyva-Perez, A. Corma, *ChemCatChem.* **2017**, *9*, 1429-1435.

[6] I. Kownacki, B. Orwat, B. Marciniec, A. Kownacka, *Tetrahedron Lett.* **2014**, *55*, 548-550.

[7] A. A. Rajkiewicz, N. Wojciechowska, M. Kalek, *ACS Catal.* **2020**, *10*, 831-841.

[8] T. Kawatsu, S. Kataoka, N. Fukaya, J.-C. Choi, K. Sato, K. Matsumoto, *Acs Omega* **2021**, *6*, 12853-12857.

[9] S. Lv, F. Xu, Y. Fan, K. Ding, Z. Li, *J. Med. Chem.* **2023**, *66*, 2851-2864.

[10] P. Boehm, N. Kehl, B. Morandi, *Angew. Chem., Int. Ed.* **2023**, *62*, e202214071; *Angew. Chem.* **2023**, *135*, e202214071.

[11] C.-X. Xu, C.-H. Ma, F.-R. Xiao, H.-W. Chen, B. Dai, *Chin. Chem. Lett.* **2016**, *27*, 1683-1685.

[12] A. A. Toutov, K. N. Betz, D. P. Schuman, W.-B. Liu, A. Fedorov, B. M. Stoltz, R. H. Grubbs, *J. Am. Chem. Soc.* **2017**, *139*, 1668-1674.

[13] M. Wissing, A. Studer, *Chem. Eur. J.* **2019**, *25*, 5870-5874.

[14] V. Percec, J. G. Rudick, M. Peterca, M. Wagner, M. Obata, C. M. Mitchell, W. D. Cho, V. S. K. Balagurusamy, P. A. Heiney, *J. Am. Chem. Soc.* **2005**, *127*, 15257-15264.

[15] T. M. El Dine, R. Jimmidi, A. Diaconu, M. Fransolet, C. Michiels, J. De Winter, E. Gillon, A. Imberty, T. Coenye, S. P. Vincent, *J. Med. Chem.* **2021**, *64*, 14728-14744.

[16] S. Picard, E. J. Cueto-Diaz, E. Genin, G. Clermont, F. Acher, D. Ogden, M. Blanchard-Desce, *Chem. Commun.* **2013**, *49*, 10805-10807.

[17] B. Marciniec, B. Dudziec, I. Kownacki, *Angew. Chem., Int. Ed.* **2006**, *45*, 8180-8184.

[18] R. Rossi, A. Carpita, T. Messeri, *synth. Comm.,* **1991**, *21*, 1875-1888.

[19] H. Y. Cho, S. K. Woo, G. T. Hwang, *Molecules* **2012**, *17*, 12061-12071.

[20] G. Albano, F. Zinna, F. Urraci, M. A. M. Capozzi, G. Pescitelli, A. Punzi, L. Di Bari, G. M. Farinola, *Chem. Eur. J.* **2022**, *28*, e202201178.

[21] C. Koerner, P. Starkov, T. D. Sheppard, *J. Am. Chem. Soc.* **2010**, *132*, 5968-+.

[22] K. Nozawa-Kumada, M. Inagi, Y. Kondo, *Asian J. Org. Chem.* **2017**, *6*, 63-66.

[23] S. N. Greszler, H. A. Reichard, G. C. Micalizio, *J. Am. Chem. Soc.* **2012**, *134*, 2766-2774.

[24] T. Tsuchimoto, M. Fujii, Y. Iketani, M. Sekine, *Adv. Synth. Catal.* **2012**, *354*, 2959-2964.

[25] Q.-C. Gan, Z.-Q. Song, C.-H. Tung, L.-Z. Wu, *Org. Lett.* **2022**, *24*, 5192-5196.

[26] V. R. Chintareddy, K. Wadhwa, J. G. Verkade, *J. Org. Chem.* **2011**, *76*, 4482-4488.

[27] N. Sakai, N. Uchida, T. Konakahara, *Tetrahedron Lett.* **2008**, *49*, 3437-3440.

[28] N. Sakai, N. Uchida, T. Konakahara, *Synlett* **2008**, 1515-1519.

[29] M.-M. Xu, X.-Y. You, Y.-Z. Zhang, Y. Lu, K. Tan, L. Yang, Q. Cai, *J. Am. Chem. Soc.* **2021**, *143*, 8993-9001.

[30] N. Asao, K. Takahashi, S. Lee, T. Kasahara, Y. Yamamoto, *J. Am. Chem. Soc.* **2002**, *124*, 12650-12651.

[31] J. Yang, N. Yoshikai, *Angew. Chem., Int. Ed.* **2016**, *55*, 2870-2874; *Angew. Chem.* **2016**, *128*, 2920-2924.

[32] M. Ueda, T. Ueno, Y. Suyama, I. Ryu, *Tetrahedron Lett.* **2017**, *58*, 2972-2974.

[33] M. Ueda, T. Ueno, Y. Suyama, I. Ryu, *Chem. Commun.* **2016**, *52*, 13237-13240.
